# Supplementary material for: Western Diet Deregulates Bile Acid Homeostasis, Cell Proliferation, and Tumorigenesis in Colon
Source: Oxford University Press journal article supplement (doi:10.1158/0008-5472.can-16-2860), 2017-04-17
Supplement: 00085472can162860-sup-172085_2_unknown_upload_3968489_hh1th6.xlsx [file 00085472can162860-sup-172085_2_unknown_upload_3968489_hh1th6.xlsx]

## Sheet: 2D DIGE different comparisons
Table S4. 2D DIGE analysis: Fold changes between different experimental groups
A. Comparson between diet groups at 12 months (12 WD vs. 12 AIN)
Fold change	t-test p-value	UniProt ID	Protein	Entrez Gene Name
1.23	8.04e-07	Q921H8	ACAA1	acetyl-CoA acyltransferase 1
1.51	1.36e-08	Q8VCH0	ACAA1B	acetyl-Coenzyme A acyltransferase 1B
1.09	0.00175	P51174	ACADL	acyl-CoA dehydrogenase, long chain
1.12	0.0015	P50544	ACADVL	acyl-CoA dehydrogenase, very long chain
-1.1	0.000151	Q8QZT1	ACAT1	acetyl-CoA acetyltransferase 1
1.13	0.00115	Q9QYR9	ACOT2	acyl-CoA thioesterase 2
1.17	1.25e-06	Q8VCW8	ACSF2	acyl-CoA synthetase family member 2
-1.06	0.00673	P57780	ACTN4	actinin, alpha 4
-1.11	0.0084	P55264	ADK	adenosine kinase
1.26	0.00121	O88312	AGR2	anterior gradient 2
1.22	0.00308	P24549	ALDH1A1	aldehyde dehydrogenase 1 family, member A1
-1.09	0.00477	P47738	ALDH2	aldehyde dehydrogenase 2 family (mitochondrial)
1.28	1.57e-05	P24270	CAT	catalase
1.27	0.00213	P48758	CBR1	carbonyl reductase 1
-1.15	0.00111	Q9WUM3	CORO1B	coronin, actin binding protein, 1B
1.1	0.000905	P52825	CPT2	carnitine palmitoyltransferase 2
1.18	0.00132	P62897	CYCS	cytochrome c, somatic
1.21	1.27e-05	P31786	DBI	diazepam binding inhibitor (GABA receptor modulator, acyl-CoA binding protein)
-1.14	0.0019	P57776	EEF1D	eukaryotic translation elongation factor 1 delta (guanine nucleotide exchange protein)
1.17	1.46e-05	Q99LC5	ETFA	electron-transfer-flavoprotein, alpha polypeptide
1.39	4.37e-05	P55050	FABP2	fatty acid binding protein 2, intestinal
-4.52	1.81e-07	P51162	FABP6	fatty acid binding protein 6, ileal
-1.1	0.000355	P26443	GLUD1	glutamate dehydrogenase 1
-1.12	0.00144	Q64521	GPD2	glycerol-3-phosphate dehydrogenase 2 (mitochondrial)
-1.17	0.000529	P13020	GSN	gelsolin
1.36	4.12e-05	Q8BMS1	HADHA	hydroxyacyl-CoA dehydrogenase/3-ketoacyl-CoA thiolase/enoyl-CoA hydratase (trifunctional protein), alpha subunit
1.14	0.000884	Q99JY0	HADHB	hydroxyacyl-CoA dehydrogenase/3-ketoacyl-CoA thiolase/enoyl-CoA hydratase (trifunctional protein), beta subunit
-1.1	0.00206	O88569	HNRNPA2B1	heterogeneous nuclear ribonucleoprotein A2/B1
-1.1	0.00243	Q8R081	HNRNPL	heterogeneous nuclear ribonucleoprotein L
1.12	8.21e-05	O88844	IDH1	isocitrate dehydrogenase 1 (NADP+), soluble
1.44	0.000181	P11679	KRT8	keratin 8, type II
1.18	0.00176	P16110	LGALS3	lectin, galactoside-binding, soluble, 3
1.08	0.00602	Q3THS6	MAT2A	methionine adenosyltransferase II, alpha
1.16	0.00761	Q99LC3	NDUFA10	NADH dehydrogenase (ubiquinone) 1 alpha subcomplex, 10, 42kDa
-1.12	0.00194	Q9DCJ5	NDUFA8	NADH dehydrogenase (ubiquinone) 1 alpha subcomplex, 8, 19kDa
-1.11	0.00312	Q02819	NUCB1	nucleobindin 1
-1.17	0.000559	P29758	OAT	ornithine aminotransferase
-1.09	0.000253	Q9D0K2	OXCT1	3-oxoacid CoA transferase 1
-1.21	0.00538	Q99K01	PDXDC1	pyridoxal-dependent decarboxylase domain containing 1
1.17	0.00125	Q9DCD0	PGD	phosphogluconate dehydrogenase
1.25	0.00116	Q9D0F9	PGM1	phosphoglucomutase 1
-1.17	0.00225	P63323	RPS12	ribosomal protein S12
-1.05	0.00715	Q9CQA3	SDHB	succinate dehydrogenase complex, subunit B, iron sulfur (Ip)
-1.13	0.00291	Q6P069	SRI	sorcin
-1.25	0.00197	P52840	SULT1A1	sulfotransferase family 1A, phenol-preferring, member 1
-1.78	0.000461	P37804	TAGLN	transgelin
1.43	0.000861	P07309	TTR	transthyretin
-1.04	0.00249	P62259	YWHAE	tyrosine 3-monooxygenase/tryptophan 5-monooxygenase activation protein, epsilon
B. Comparson between diet groups at 18 months (18 WD vs. 18 AIN)
Fold change	t-test p-value	UniProt ID	Protein	Entrez Gene Name
1.25	1.21e-05	Q921H8	ACAA1	acetyl-CoA acyltransferase 1
1.46	9.25e-06	Q8VCH0	ACAA1B	acetyl-Coenzyme A acyltransferase 1B
1.12	0.000391	Q8BWT1	ACAA2	acetyl-CoA acyltransferase 2
1.16	0.000106	P51174	ACADL	acyl-CoA dehydrogenase, long chain
1.08	0.00231	P45952	ACADM	acyl-CoA dehydrogenase, C-4 to C-12 straight chain
1.13	0.000419	P50544	ACADVL	acyl-CoA dehydrogenase, very long chain
-1.07	0.00274	Q8QZT1	ACAT1	acetyl-CoA acetyltransferase 1
-1.1	0.00709	Q8CAY6	ACAT2	acetyl-CoA acetyltransferase 2
1.14	0.00277	Q9QYR9	ACOT2	acyl-CoA thioesterase 2
1.2	5.92e-05	Q8VCW8	ACSF2	acyl-CoA synthetase family member 2
1.29	9.52e-05	O88312	AGR2	anterior gradient 2
1.26	0.000857	P24270	CAT	catalase
1.19	0.00423	P48758	CBR1	carbonyl reductase 1
1.09	0.00858	Q9DBP5	CMPK1	cytidine monophosphate (UMP-CMP) kinase 1, cytosolic
1.14	0.000977	P52825	CPT2	carnitine palmitoyltransferase 2
1.15	0.00344	P62897	CYCS	cytochrome c, somatic
1.13	0.00018	P31786	DBI	diazepam binding inhibitor (GABA receptor modulator, acyl-CoA binding protein)
1.12	5.89e-06	Q99LC5	ETFA	electron-transfer-flavoprotein, alpha polypeptide
1.1	0.000228	Q9DCW4	ETFB	electron-transfer-flavoprotein, beta polypeptide
1.12	0.00401	Q921G7	ETFDH	electron-transferring-flavoprotein dehydrogenase
1.19	0.00495	P55050	FABP2	fatty acid binding protein 2, intestinal
-1.89	0.00318	P51162	FABP6	fatty acid binding protein 6, ileal
1.07	0.00926	Q9CZD3	GARS	glycyl-tRNA synthetase
-1.04	0.00646	P05202	GOT2	glutamic-oxaloacetic transaminase 2, mitochondrial
1.24	0.00194	Q8BMS1	HADHA	hydroxyacyl-CoA dehydrogenase/3-ketoacyl-CoA thiolase/enoyl-CoA hydratase (trifunctional protein), alpha subunit
1.11	0.0014	Q99JY0	HADHB	hydroxyacyl-CoA dehydrogenase/3-ketoacyl-CoA thiolase/enoyl-CoA hydratase (trifunctional protein), beta subunit
1.33	0.000368	P54869	HMGCS2	3-hydroxy-3-methylglutaryl-CoA synthase 2 (mitochondrial)
-1.11	0.00653	Q3U9G0	HSPA8	heat shock 70kDa protein 8
1.1	0.000489	O88844	IDH1	isocitrate dehydrogenase 1 (NADP+), soluble
1.07	0.000559	Q3THS6	MAT2A	methionine adenosyltransferase II, alpha
-1.14	4.38e-06	Q9D0K2	OXCT1	3-oxoacid CoA transferase 1
-1.26	0.00314	O88428	PAPSS2	3'-phosphoadenosine 5'-phosphosulfate synthase 2
-1.19	0.00199	P52840	SULT1A1	sulfotransferase family 1A, phenol-preferring, member 1
1.11	0.00563	P61089	UBE2N	ubiquitin-conjugating enzyme E2N
-1.17	0.00941	Q9CZ13	UQCRC1	ubiquinol-cytochrome c reductase core protein I
C. Comparson between Western diet groups at 12 and 18 months (12 WD vs. 18 WD)
Fold change	t-test p-value	UniProt ID	Protein	Entrez Gene Name
1.09	0.00631	Q8VCW8	ACSF2	acyl-CoA synthetase family member 2
-1.1	0.00184	P05064	ALDOA	aldolase A, fructose-bisphosphate
1.05	0.00735	Q99PT1	ARHGDIA	Rho GDP dissociation inhibitor (GDI) alpha
3.43	0.000248	P51162	FABP6	fatty acid binding protein 6, ileal
1.17	0.000349	Q9JK07	FBP2	fructose-1,6-bisphosphatase 2
1.04	0.00964	Q61598	GDI2	GDP dissociation inhibitor 2
1.08	0.00808	Q8R081	HNRNPL	heterogeneous nuclear ribonucleoprotein L
1.09	0.00356	P20029	HSPA5	heat shock 70kDa protein 5 (glucose-regulated protein, 78kDa)
-1.14	0.00133	P19001	KRT19	keratin 19, type I
-1.14	0.0037	P08249	MDH2	malate dehydrogenase 2, NAD (mitochondrial)
-1.08	0.00165	Q9D0K2	OXCT1	3-oxoacid CoA transferase 1
-1.13	0.00114	Q9Z2I9	SUCLA2	succinate-CoA ligase, ADP-forming, beta subunit
-1.15	0.000115	P40142	TKT	transketolase
1.07	0.00623	P23591	TSTA3	tissue specific transplantation antigen P35B
D. Comparson between diet groups at 21 months (21 WD vs. 21 AIN)
Fold change	t-test p-value	UniProt ID	Protein	Entrez Gene Name
1.23	0.000151	Q921H8	ACAA1	acetyl-CoA acyltransferase 1
1.6	0.000118	Q8VCH0	ACAA1B	acetyl-Coenzyme A acyltransferase 1B
1.18	0.00584	Q8BWT1	ACAA2	acetyl-CoA acyltransferase 2
1.19	0.00752	P51174	ACADL	acyl-CoA dehydrogenase, long chain
1.11	0.00731	P45952	ACADM	acyl-CoA dehydrogenase, C-4 to C-12 straight chain
1.22	0.00227	P50544	ACADVL	acyl-CoA dehydrogenase, very long chain
1.18	0.00405	Q9QYR9	ACOT2	acyl-CoA thioesterase 2
1.18	0.00657	Q8VCW8	ACSF2	acyl-CoA synthetase family member 2
-1.12	0.00017	P55264	ADK	adenosine kinase
1.33	8.28e-05	O88312	AGR2	anterior gradient 2
-1.08	0.00268	P05064	ALDOA	aldolase A, fructose-bisphosphate
1.33	0.00257	P24270	CAT	catalase
1.23	0.000203	P31786	DBI	diazepam binding inhibitor (GABA receptor modulator, acyl-CoA binding protein)
-1.12	0.00975	O08553	DPYSL2	dihydropyrimidinase-like 2
1.12	0.000707	Q99LC5	ETFA	electron-transfer-flavoprotein, alpha polypeptide
-1.18	0.000889	Q9DCW4	ETFB	electron-transfer-flavoprotein, beta polypeptide
1.19	0.0002	P04117	FABP4	fatty acid binding protein 4, adipocyte
-2.29	5.98e-05	P51162	FABP6	fatty acid binding protein 6, ileal
1.09	0.00154	Q9CZD3	GARS	glycyl-tRNA synthetase
1.16	0.000117	Q9D0E1	HNRNPM	heterogeneous nuclear ribonucleoprotein M
1.11	0.00457	O88844	IDH1	isocitrate dehydrogenase 1 (NADP+), soluble
1.27	0.00428	Q9D312	KRT20	keratin 20, type I
-1.12	0.00227	P29758	OAT	ornithine aminotransferase
-1.11	3.1e-05	Q9D0K2	OXCT1	3-oxoacid CoA transferase 1
-1.41	0.00142	O88428	PAPSS2	3'-phosphoadenosine 5'-phosphosulfate synthase 2
-1.29	0.000122	P52840	SULT1A1	sulfotransferase family 1A, phenol-preferring, member 1
-1.19	0.00553	Q9D939	SULT1C2	sulfotransferase family, cytosolic, 1C, member 2
1.52	0.0031	Q63915	TF	transferrin
E. Comparson between Western diet groups at 18 and 21 months (21 WD vs. 18 WD)
Fold change	t-test p-value	UniProt ID	Protein	Entrez Gene Name
-1.09	0.00238	P97429	ANXA4	annexin A4
-1.33	8.96e-07	P48036	ANXA5	annexin A5
1.06	0.00834	Q61792	LASP1	LIM and SH3 protein 1
-1.22	0.00105	P40142	TKT	transketolase
