# Supplementary material for: Western Diet Deregulates Bile Acid Homeostasis, Cell Proliferation, and Tumorigenesis in Colon
Source: Oxford University Press journal article supplement (doi:10.1158/0008-5472.can-16-2860), 2017-04-17
Supplement: 00085472can162860-sup-172085_2_unknown_upload_3968491_551t59.xlsx [file 00085472can162860-sup-172085_2_unknown_upload_3968491_551t59.xlsx]

## Sheet: LCMS expression data
Table S6. LC-MS analysis: Abundance matrix and fold changes between different experimental groups
Accession	Gene ID	12m AIN_1	12m AIN_2	12m AIN_3	12m WD_1	12m WD_2	12m WD_3	18m AIN_1	18m AIN_2	18m AIN_3	18m WD_1	18m WD_2	18m WD_3	Average 12 AIN	Average 12 WD	Average 18 AIN	Average 18 WD	12 WD / 12 AIN	p value	18 WD / 18AIN	p value	18 WD / 12 WD	p value	18AIN / 12 AIN	p value	Peptide count	Peptides used for quantitation	Confidence score	Description
Q3V3R1	Mthfd1l	1607.99	1541.77	1431.54	0	0	0	1404.86	1365.53	1363.16	1105.62	1209.75	1219.25	1527.1	0	1377.85	1178.21	0	0.00695438	0.855108	0.051401	Inf	0.00462161	0.902265	0.0625051	4	1	21.94	Monofunctional C1-tetrahydrofolate synthase, mitochondrial OS=Mus musculus GN=Mthfd1l
Q9CQ62	Decr1	903.012	760.239	595.929	262.76	286.736	295.881	342.765	423.319	270.936	1177.41	1180.17	859.658	753.06	281.792	345.673	1072.41	0.374197	0.0598702	3.10238	0.0348867	3.80567	0.0302949	0.459025	0.0195063	9	2	44.1625	2,4-dienoyl-CoA reductase, mitochondrial OS=Mus musculus GN=Decr1
O88312	Agr2	240923	240561	241613	154604	153270	152026	190053	189038	183131	236930	228882	230254	241032	153300	187407	232022	0.636014	0.000815691	1.23806	0.00468029	1.51352	0.0029426	0.777519	0.00254523	39	34	88.1964	Anterior gradient protein 2 homolog OS=Mus musculus GN=Agr2
Q64436	Atp4a	8592.01	8362.02	8095.26	1441.91	1469.69	1438.49	8065.27	7807.49	7420.46	6827.33	7245.78	6447.22	8349.76	1450.03	7764.4	6840.11	0.173661	0.00427505	0.880957	0.0751447	4.71721	0.00691829	0.929895	0.0095951	15	1	90.669	Potassium-transporting ATPase alpha chain 1 OS=Mus musculus GN=Atp4a
Q99M74	Krt82	4402.37	4293.73	4458.63	65542.4	66445.5	65404.8	4042.13	3655.27	3733.9	3151.22	3157.39	3534.27	4384.91	65797.6	3810.43	3280.96	15.0055	0.000962008	0.861047	0.0751447	0.0498645	0.00028337	0.868988	0.0379706	9	5	44.7518	Keratin, type II cuticular Hb2 OS=Mus musculus GN=Krt82
P05064	Aldoa	225994	225779	224870	183559	183275	183482	218464	217999	214327	213989	209103	209691	225548	183439	216930	210928	0.813303	0.00109542	0.97233	0.0811025	1.14985	0.00941224	0.961793	0.0132093	46	31	265.211	Fructose-bisphosphate aldolase A OS=Mus musculus GN=Aldoa
Q9D939	Sult1c2	10502.3	11226	10700.1	6604	6696.43	6626.16	12232.8	11159.5	10964.1	10735.8	10268.7	11141.2	10809.5	6642.19	11452.2	10715.3	0.614479	0.0105016	0.935653	0.273604	1.61321	0.0101159	1.05946	0.361464	14	8	107.538	Sulfotransferase 1C2 OS=Mus musculus GN=Sult1c2
O88531	Ppt1	112.18	92.752	125.915	285.392	280.41	234.363	223.802	198.831	126.487	448.298	481.341	502.254	110.283	266.722	183.04	477.298	2.41853	0.0113724	2.60762	0.01563	1.7895	0.00399872	1.65974	0.181968	3	1	18.2747	Palmitoyl-protein thioesterase 1 OS=Mus musculus GN=Ppt1
P62204	Calm1	11213.8	11411.6	9457.1	8240.1	8144.67	7903.97	8216.52	8449.69	8394.26	13478.9	13887	12601.4	10694.1	8096.25	8353.49	13322.4	0.757073	0.0817038	1.59484	0.0204994	1.64551	0.00986222	0.781127	0.0595434	32	6	126.254	Calmodulin OS=Mus musculus GN=Calm1
Q6ZQ06	Cep162	21929.7	20273.4	22107.4	4876.71	5089.18	5277.11	15693.4	15681.8	14819.8	12448.1	11729	12393.7	21436.8	5081	15398.3	12190.3	0.237022	0.00609436	0.791663	0.0101493	2.39919	0.00163439	0.718312	0.0153163	26	4	100.998	Centrosomal protein of 162 kDa OS=Mus musculus GN=Cep162
P01878	Ig alpha chain C region	13572.8	13602.9	13757.6	18671.2	19076.8	18858.9	18904.8	18554.9	19307.5	24392.7	24970.6	25590.8	13644.5	18869	18922.4	24984.7	1.3829	0.00136864	1.32038	0.00585745	1.32412	0.00577208	1.38682	0.000676885	4	3	29.9401	Ig alpha chain C region OS=Mus musculus
P62500	Tsc22d1	3377.46	3330.77	3382.74	11579	11431.2	11074.6	3621.52	3633.61	3681.57	3416.77	3122.13	2872.63	3363.66	11361.6	3645.57	3137.18	3.37775	0.00385664	0.860546	0.132631	0.276121	0.00028337	1.08381	0.00447149	1	1	12.054	TSC22 domain family protein 1 OS=Mus musculus GN=Tsc22d1
Q3TTY5	Krt2	11312.1	10377.5	11514.8	16455.5	16268	16496.9	12075.2	12423.9	12270.8	14435.7	15190.2	15260.2	11068.1	16406.8	12256.6	14962	1.48235	0.0127552	1.22073	0.0201311	0.91194	0.0414488	1.10738	0.116093	28	3	165.207	Keratin, type II cytoskeletal 2 epidermal OS=Mus musculus GN=Krt2
Q6IRU2	Tpm4	51633.1	50438.8	49278.7	69921.6	69126.4	70583.6	34287	35351.6	32671.1	32414.8	33734.3	32961.9	50450.2	69877.2	34103.3	33037	1.38507	0.00190347	0.968734	0.386792	0.472786	0.00028337	0.675978	0.00216491	24	10	145.325	Tropomyosin alpha-4 chain OS=Mus musculus GN=Tpm4
Q70KF4	Cmya5	2812.37	2777.33	2770.61	20262.2	18827.8	19434.7	3895.61	3854.7	4002.35	3180.41	3403.38	3577.58	2786.77	19508.2	3917.55	3387.12	7.0003	0.005135	0.864602	0.0660773	0.173626	0.00240515	1.40577	0.00161043	7	3	24.0686	Cardiomyopathy-associated protein 5 OS=Mus musculus GN=Cmya5
P55012	Slc12a2	23920.2	23714.4	24357.2	26828.7	26933.8	26989.4	22609.8	22520.9	23688.2	19465.4	20143.8	20839.8	23997.3	26917.3	22939.6	20149.7	1.12168	0.0113724	0.878378	0.02617	0.748578	0.00941224	0.955927	0.0359013	25	12	131.166	Solute carrier family 12 member 2 OS=Mus musculus GN=Slc12a2
Q08091	Cnn1	37923.6	37749.6	37380.8	38288.2	37536.9	38565.4	41067	42386.5	44196.5	33541.3	33552.9	32985.3	37684.7	38130.2	42550	33359.8	1.01182	0.346849	0.784014	0.0269349	0.874893	0.00329757	1.12911	0.0416389	18	10	152.747	Calponin-1 OS=Mus musculus GN=Cnn1
P01942	Hba	163161	163825	164552	144031	143872	145205	120729	122105	119787	157725	156175	159705	163846	144369	120874	157868	0.881129	0.000815691	1.30606	0.0023422	1.0935	0.00750806	0.737728	0.000525723	25	19	94.6081	Hemoglobin subunit alpha OS=Mus musculus GN=Hba
Q99KK7	Dpp3	7505.74	7796.5	7438.71	7683.53	7685.92	7753.82	7737.57	7343.67	7736.35	6358.41	6591.48	6065.46	7580.31	7707.76	7605.86	6338.45	1.01681	0.423024	0.833364	0.0176599	0.822347	0.0219834	1.00337	0.927106	7	3	37.2218	Dipeptidyl peptidase 3 OS=Mus musculus GN=Dpp3
Q99JY9	Actr3	23430.7	23594	24249.9	25037.6	24518.5	24298.9	20204.8	19648.4	19925.9	22402.6	21632.1	21888	23758.2	24618.4	19926.4	21974.2	1.0362	0.0981933	1.10277	0.0154974	0.892596	0.00506646	0.838715	0.00662684	10	7	87.1449	Actin-related protein 3 OS=Mus musculus GN=Actr3
P61027	Rab10	5256.7	5330.91	5690.47	8496.26	8955.86	8926.64	6782.35	7389.07	7297.81	6840.3	6693.69	6745.72	5426.03	8792.92	7156.41	6759.91	1.62051	0.00198798	0.944594	0.230709	0.76879	0.00941224	1.3189	0.00803581	12	4	71.9382	Ras-related protein Rab-10 OS=Mus musculus GN=Rab10
Q9R0H0	Acox1	13506	13556	13756.9	24938.4	25034.8	25215.8	18363.9	19672.6	20006.8	30033.9	29846.7	29705	13606.3	25063	19347.7	29861.9	1.84201	7.3149e-05	1.54343	0.0118471	1.19147	0.000303509	1.42197	0.00392437	16	8	125.372	Peroxisomal acyl-coenzyme A oxidase 1 OS=Mus musculus GN=Acox1
F6ZDS4	Tpr	44517.2	43514.1	42692.4	46623.9	46454.1	46921.6	42657	42386.9	41306	44374.7	43311.1	43072.2	43574.6	46666.5	42116.6	43586	1.07096	0.0443517	1.03489	0.108498	0.933989	0.0210377	0.966542	0.019133	61	19	281.854	Nucleoprotein TPR OS=Mus musculus GN=Tpr
Q9D1G1	Rab1b	12671	12206	12212	16395.1	16862.4	16852.5	10909.4	10715.1	10070.3	11342.7	12459.2	12377.9	12363	16703.3	10564.9	12059.9	1.35107	0.001322	1.14151	0.0672858	0.722008	0.00746977	0.854559	0.0134862	19	2	121.42	Ras-related protein Rab-1B OS=Mus musculus GN=Rab1b
P51162	Fabp6	70542.4	68731.4	69320.3	11929.4	12658.4	12028.8	106625	107919	109283	57893.8	57063.6	55182.4	69531.4	12205.5	107942	56713.2	0.17554	0.000815691	0.525404	0.00057607	4.64652	0.00163439	1.55242	0.000928434	16	12	80.588	Gastrotropin OS=Mus musculus GN=Fabp6
O35350	Capn1	14970.7	15258	14938.9	16959.6	17009.1	17250.5	15507	16080.1	15223.4	15564.8	15565.8	15040.6	15055.9	17073.1	15603.5	15390.4	1.13398	0.00232381	0.98634	0.60308	0.901442	0.0100259	1.03637	0.0672404	22	8	127.138	Calpain-1 catalytic subunit OS=Mus musculus GN=Capn1
P63260	Actg1	396508	393796	400212	368835	365561	362778	374826	375071	367596	368473	362562	364748	396838	365725	372498	365261	0.921596	0.00358947	0.980572	0.131495	0.998733	0.875285	0.938664	0.0291784	144	33	423.03	Actin, cytoplasmic 2 OS=Mus musculus GN=Actg1
Q9D7Z6	Clca1	82311.9	80642.4	80232.3	79550.3	78337.6	77150.6	70958.8	69363	67838.6	72542.6	73134.7	72865	81062.2	78346.2	69386.8	72847.5	0.966494	0.0757779	1.04988	0.10069	0.929815	0.0232242	0.855969	0.00154214	39	23	293.366	Calcium-activated chloride channel regulator 1 OS=Mus musculus GN=Clca1
P97351	Rps3a	31640.5	31605.8	30180.4	48072.9	47405.7	46719.6	26702.1	26859.8	25403	21246	21382.8	20468.9	31142.2	47399.4	26321.7	21032.6	1.52203	0.000962008	0.799059	0.011234	0.443731	0.00028337	0.845208	0.000290603	18	9	130.962	40S ribosomal protein S3a OS=Mus musculus GN=Rps3a
Q80X19	Col14a1	8957.65	9175.82	9837.93	9315.77	9758.44	9475.68	12760.6	11683.9	11598.3	10718.7	10598.2	10734.3	9323.8	9516.63	12014.3	10683.7	1.02068	0.619335	0.889253	0.115384	1.12264	0.0165294	1.28856	0.0439478	33	11	157.9	Collagen alpha-1(XIV) chain OS=Mus musculus GN=Col14a1
P01864	Ig gamma-2A chain C region secreted form	13663.8	14408.3	14682.3	10620.2	10892.6	10960.6	14287.5	14697.4	13828.4	21463	20617.6	20848.4	14251.5	10824.5	14271.1	20976.3	0.759533	0.0147633	1.46984	0.00327872	1.93786	0.00153346	1.00138	0.965745	9	6	58.0283	Ig gamma-2A chain C region secreted form OS=Mus musculus
Q60604	Scin	19922	20226.3	20630.8	31136	31478.4	30613	22626.5	22257.1	22916.4	21995.7	23033.5	23530.9	20259.7	31075.8	22600	22853.4	1.53387	0.000815691	1.01121	0.704425	0.735407	0.00294596	1.11551	0.00727044	28	14	187.32	Adseverin OS=Mus musculus GN=Scin
Q64523	Hist2h2ac	168763	166305	158893	100977	101041	103760	112047	110404	112188	106078	112015	116300	164654	101926	111546	111464	0.619034	0.00662314	0.999264	0.983692	1.09358	0.0990298	0.677462	0.00276986	13	12	30.0928	Histone H2A type 2-C OS=Mus musculus GN=Hist2h2ac
Q91W50	Csde1	9948.85	9908.65	10066.4	9400.95	9398.43	9471.82	6131.79	6120.55	5839.21	7424.91	7091.79	6951.55	9974.65	9423.73	6030.52	7156.08	0.944769	0.00957267	1.18665	0.0196956	0.759368	0.00941224	0.604584	0.00166892	18	5	98.4708	Cold shock domain-containing protein E1 OS=Mus musculus GN=Csde1
Q99K01	Pdxdc1	32699.8	32808.3	33654.8	24753.6	24059.7	24172.2	27274.6	27539.1	27641.9	31097	30796.4	30800.5	33054.3	24328.5	27485.2	30898	0.736017	0.00136864	1.12417	0.00221898	1.27003	0.00178451	0.831517	0.00122377	26	12	159.056	Pyridoxal-dependent decarboxylase domain-containing protein 1 OS=Mus musculus GN=Pdxdc1
P09528	Fth1	6772.4	6555.36	6755.05	10608.1	10648.3	10903.5	5837.31	5838.96	5929.47	11387.3	11370.3	10082	6694.27	10720	5868.58	10946.5	1.60136	0.000815691	1.86528	0.0261466	1.02114	0.693315	0.876657	0.00517764	8	5	41.4113	Ferritin heavy chain OS=Mus musculus GN=Fth1
P97816	S100g	4646.75	4458.27	4494.87	9889.1	9190.54	8560.09	4775.36	4638.13	4312.09	5779.62	5675.13	5672.89	4533.3	9213.24	4575.19	5709.21	2.03235	0.0185765	1.24786	0.0337953	0.619675	0.0226348	1.00924	0.769668	7	6	33.3372	Protein S100-G OS=Mus musculus GN=S100g
Q9D309	Fam3b	74.0193	102.701	41.2536	87.4266	127.552	78.0805	407.495	368.492	280.467	381.688	461.203	406.081	72.658	97.6863	352.151	416.324	1.34447	0.403912	1.18223	0.306816	4.26184	0.00413921	4.8467	0.0129893	1	1	5.5315	Protein FAM3B OS=Mus musculus GN=Fam3b
P02535	Krt10	11179.9	12091.1	12028.4	12094.3	12428.9	12694.3	12578.4	12587.7	13604	14696.7	14452.8	14597.4	11766.5	12405.8	12923.4	14582.3	1.05434	0.200424	1.12837	0.0710637	1.17544	0.00826306	1.09832	0.0728455	27	6	172.414	Keratin, type I cytoskeletal 10 OS=Mus musculus GN=Krt10
Q6KCD5	Nipbl	747.02	933.767	762.999	94.529	80.2797	56.9075	67.5365	67.9551	116.952	397.736	631.904	641.445	814.595	77.2387	84.1479	557.028	0.0948185	0.0176252	6.61964	0.0550322	7.21177	0.0404747	0.1033	0.00912335	6	1	22.4321	Nipped-B-like protein OS=Mus musculus GN=Nipbl
Q3V1L6	Mtmr11	1251.4	1272.86	1288.03	1378.75	1352.48	1390.11	1039.8	1017.07	986.613	837.012	910.934	970.945	1270.76	1373.78	1014.49	906.297	1.08107	0.0111482	0.893349	0.145646	0.65971	0.0112229	0.798336	0.0106909	5	1	29.0233	Myotubularin-related protein 11 OS=Mus musculus GN=Mtmr11
P15864	Hist1h1c	51332.3	50620.2	51627.2	46242.3	44308.3	46104.3	25122.7	25417.4	26090.8	28118.7	26586.9	27029.1	51193.2	45551.6	25543.6	27244.9	0.889797	0.0157693	1.0666	0.0820658	0.598111	0.000875601	0.498965	0.000198466	16	4	83.1476	Histone H1.2 OS=Mus musculus GN=Hist1h1c
Q61838	A2m	15215.1	15106.2	14662.1	22356.4	22105	22983.1	17699.6	17991.4	18536.7	17297.4	17412.2	18121.7	14994.5	22481.5	18075.9	17610.4	1.49932	0.00168672	0.974247	0.334316	0.783329	0.0019114	1.20551	0.017129	28	8	149.078	Alpha-2-macroglobulin OS=Mus musculus GN=A2m
Q00896	Serpina1c	6828.68	6639.73	7104.86	7209.08	7124.42	7011.28	9466.53	9385.99	9807.4	7308.11	7063.67	7228.72	6857.76	7114.93	9553.31	7200.17	1.0375	0.242178	0.753683	0.00622043	1.01198	0.451706	1.39307	0.000486885	9	1	70.0765	Alpha-1-antitrypsin 1-3 OS=Mus musculus GN=Serpina1c
Q9CXZ1	Ndufs4	22750.6	22091.5	21707	6373.8	6783.64	6042.63	25137.7	24475.4	23882.2	23650.5	24033.1	23876.2	22183	6400.02	24498.4	23853.2	0.28851	0.000815691	0.973663	0.281737	3.72706	0.000373249	1.10438	0.000417868	8	4	52.6316	NADH dehydrogenase [ubiquinone] iron-sulfur protein 4, mitochondrial OS=Mus musculus GN=Ndufs4
Q91YR1	Twf1	9335.26	9735.32	9636.93	10014.1	10009.7	9500.09	7119.33	7535.56	7456.76	8165.44	7500.01	7527.34	9569.17	9841.27	7370.55	7730.93	1.02844	0.329241	1.04889	0.315479	0.785562	0.00728884	0.770239	0.000350897	14	6	80.5372	Twinfilin-1 OS=Mus musculus GN=Twf1
P01027	C3	6035.41	6104.6	5981.17	6428.08	6364.37	6250.45	6438.21	6524.05	6921.26	4825.42	4849.48	4712.05	6040.39	6347.64	6627.84	4795.65	1.05086	0.0277487	0.723562	0.0192323	0.755502	0.000741137	1.09725	0.0749939	17	5	87.8447	Complement C3 OS=Mus musculus GN=C3
O55137	Acot1	2262.08	2169.19	2525.75	8900.78	8582.43	8991.94	3243.87	3407	3517.48	3994.55	4030.56	4069.35	2319.01	8825.05	3389.45	4031.49	3.80553	0.000771794	1.18942	0.0339139	0.456823	0.00304615	1.4616	0.00890993	6	3	31.3592	Acyl-coenzyme A thioesterase 1 OS=Mus musculus GN=Acot1
Q60974	Ncor1	1092.77	1054.34	1187.74	4666.27	4669.42	5145.33	741.837	979.2	1121.62	1122	755.297	749.231	1111.62	4827	947.553	875.509	4.34232	0.00682854	0.923969	0.741937	0.181377	0.00109801	0.852408	0.248661	8	2	38.642	Nuclear receptor corepressor 1 OS=Mus musculus GN=Ncor1
P40142	Tkt	199211	197004	202582	186358	188179	191823	178709	182833	185904	186224	184056	189003	199599	188787	182482	186428	0.945829	0.0238169	1.02162	0.273604	0.987505	0.380085	0.914243	0.0121631	50	39	264.176	Transketolase OS=Mus musculus GN=Tkt
Q99LB6	Mat2b	987.118	974.942	842.637	158.834	213.952	106.158	598.313	512.24	396.113	1206.93	1133.89	1088.97	934.899	159.648	502.222	1143.26	0.170765	0.00406968	2.27641	0.0124867	7.16115	0.000763151	0.537194	0.0132353	4	1	20.3514	Methionine adenosyltransferase 2 subunit beta OS=Mus musculus GN=Mat2b
Q921I1	Tf	122120	120751	122573	130800	132725	134534	194224	192822	194226	192873	187828	190840	121815	132687	193757	190514	1.08925	0.0121768	0.98326	0.212727	1.43582	0.000512282	1.59059	2.3053e-05	55	41	331.693	Serotransferrin OS=Mus musculus GN=Tf
Q8VDJ3	Hdlbp	21866.4	21995.3	23299.5	22352.7	22253.4	21929.2	39470.3	40718.2	38563.6	35063.7	34517.8	34904.1	22387.1	22178.4	39584	34828.5	0.99068	0.750448	0.879863	0.0368702	1.57038	0.00028337	1.76816	0.0035188	34	11	208.345	Vigilin OS=Mus musculus GN=Hdlbp
Q9CY50	Ssr1	6701.12	6774.05	6588.97	6288.51	6100.06	6224.82	5715.65	5243.93	5691.42	5155.92	5372.23	5555.24	6688.05	6204.46	5550.33	5361.13	0.927694	0.0131468	0.965912	0.459595	0.864076	0.018019	0.829888	0.0325448	4	2	17.981	Translocon-associated protein subunit alpha OS=Mus musculus GN=Ssr1
P01867	Igh-3	5779.7	5529.79	5580.52	6233.36	5720.19	5305.61	12066.7	12653.3	12061.8	7053.4	7023.73	6952.26	5630	5753.05	12260.6	7009.8	1.02186	0.749491	0.571735	0.00977514	1.21845	0.0610893	2.17772	0.00117707	5	4	33.4692	Ig gamma-2B chain C region OS=Mus musculus GN=Igh-3
P43274	Hist1h1e	28352.5	28527.3	29427.6	26584.3	25829.8	27922	12550	13016.8	14925.4	13236.5	14954.5	15164.5	28769.1	26778.7	13497.4	14451.8	0.930815	0.0986438	1.07071	0.449198	0.539676	0.00178383	0.469163	0.00293731	12	1	66.5699	Histone H1.4 OS=Mus musculus GN=Hist1h1e
Q9CQS8	Sec61b	5272.16	5274.64	5399.08	6706.77	6564.15	6540.1	6365.8	6446.45	6568.48	5609.28	5600.11	5720.45	5315.29	6603.67	6460.24	5643.28	1.24239	0.00168624	0.87354	0.00822565	0.854567	0.00202385	1.21541	0.000328044	3	2	24.0571	Protein transport protein Sec61 subunit beta OS=Mus musculus GN=Sec61b
P17879	Hspa1b	11735.7	12193	11768.3	11006.9	10629.7	11104.5	12073.9	12690.8	11735.8	8789.97	8746.61	8439.52	11899	10913.7	12166.8	8658.7	0.917197	0.0235103	0.711666	0.0150036	0.793376	0.00277459	1.02251	0.22878	37	6	227.251	Heat shock 70 kDa protein 1B OS=Mus musculus GN=Hspa1b
Q9R112	Sqrdl	80278.6	79086.4	79674.1	74017.7	74580.5	74746.4	83877.5	82712.2	83231.6	84445.7	84503.4	85736.4	79679.7	74448.2	83273.8	84895.2	0.934344	0.00482599	1.01947	0.0808619	1.14033	0.00200494	1.04511	6.51361e-05	23	16	178.825	Sulfide:quinone oxidoreductase, mitochondrial OS=Mus musculus GN=Sqrdl
P31001	Des	86677.5	86550.8	86568	93957.8	94284.3	93335.8	89376	90835.6	86841.7	78329.8	78646.7	78108.8	86598.8	93859.3	89017.7	78361.7	1.08384	0.00710024	0.880294	0.0339139	0.834885	0.000512282	1.02793	0.172597	56	20	345.362	Desmin OS=Mus musculus GN=Des
Q01149	Col1a2	28614.3	29370.4	29931.6	31424	31224.9	32574.1	36232.8	36416.6	37624.6	39419.7	39100.8	39357	29305.4	31741	36758	39292.5	1.08311	0.0307416	1.06895	0.055595	1.23791	0.00746977	1.25431	0.000738025	30	11	205.633	Collagen alpha-2(I) chain OS=Mus musculus GN=Col1a2
Q8VCT4	Ces1d	23968.9	25169.1	25419	23521.5	22425.6	23108.2	27800.9	28598.6	28582	24831.2	24594	24646.4	24852.3	23018.4	28327.1	24690.5	0.926209	0.0615492	0.871621	0.0168073	1.07264	0.0468834	1.13982	0.004798	23	11	150.628	Carboxylesterase 1D OS=Mus musculus GN=Ces1d
P63158	Hmgb1	36658.2	35890	36362.2	40277.2	41485.3	41577.7	45080.3	45402.2	44517.7	35795.2	35449.3	36421.6	36303.4	41113.4	45000.1	35888.7	1.13249	0.00934692	0.797526	0.00216793	0.87292	0.00460729	1.23955	0.00227177	12	7	81.3812	High mobility group protein B1 OS=Mus musculus GN=Hmgb1
P13634	Ca1	1.14495e+06	1.15609e+06	1.15931e+06	1.30193e+06	1.2987e+06	1.29474e+06	1.49276e+06	1.53295e+06	1.52878e+06	1.41844e+06	1.40785e+06	1.41024e+06	1.15345e+06	1.29846e+06	1.51817e+06	1.41218e+06	1.12571	0.00232381	0.930186	0.0337647	1.08758	0.000741137	1.31619	0.000327562	102	71	181.585	Carbonic anhydrase 1 OS=Mus musculus GN=Ca1
Q8CE72	C5orf42 homolog	34.9504	22.4184	38.8839	32550.2	29219.4	29668.9	5.11623	46.9801	0	12.0014	23.9337	0	32.0843	30479.5	17.3654	11.9784	949.983	0.0070606	0.689782	0.806501	0.000392998	0.00523193	0.541245	0.336962	5	2	22.2409	Uncharacterized protein C5orf42 homolog OS=Mus musculus
O08709	Prdx6	66236.2	70083.1	69709.5	69414.3	67769.5	67819.3	79874.6	79304	79608.1	67835.1	67349	67696.2	68676.3	68334.4	79595.6	67626.8	0.995021	0.855669	0.84963	0.00057607	0.989645	0.363281	1.159	0.0175578	20	15	131.984	Peroxiredoxin-6 OS=Mus musculus GN=Prdx6
P04104	Krt1	18244	18534.4	18946.2	21092.2	21174.1	21467.1	18402	17718.6	18757.2	21028.1	21350.6	21632.9	18574.9	21244.5	18292.6	21337.2	1.14372	0.00705214	1.16644	0.0150219	1.00437	0.716411	0.984805	0.428843	31	4	184.267	Keratin, type II cytoskeletal 1 OS=Mus musculus GN=Krt1
P62874	Gnb1	18546.7	17534.7	16667.1	21407.2	21396.9	20482.7	17013.1	17465.9	15909.2	17571.7	17460.9	15962	17582.8	21095.6	16796.1	16998.2	1.19978	0.0248767	1.01203	0.824388	0.80577	0.0128481	0.955253	0.195289	6	5	43.3675	Guanine nucleotide-binding protein G(I)/G(S)/G(T) subunit beta-1 OS=Mus musculus GN=Gnb1
Q8VCW8	Acsf2	96143.7	96018.5	96887.1	77230.7	78178.2	79711	93676.8	95168.3	96037.8	102205	98666.4	97905	96349.8	78373.3	94961	99592	0.813425	0.00456326	1.04877	0.0956934	1.27074	0.00369398	0.985586	0.125612	29	21	154.513	Acyl-CoA synthetase family member 2, mitochondrial OS=Mus musculus GN=Acsf2
P07309	Ttr	28029	28220.6	28308.3	44158	45399.6	46407.3	36990.5	38206.4	38608.7	37895.6	38177.8	37830	28186	45321.6	37935.2	37967.8	1.60795	0.00711648	1.00086	0.963667	0.837742	0.0155317	1.34589	0.00112552	9	8	55.004	Transthyretin OS=Mus musculus GN=Ttr
P63280	Ube2i	3123.75	3204.45	3167.96	2363.85	2217.05	2299.8	3286.25	3296.05	3277.47	3199.73	3167.72	2961.95	3165.39	2293.56	3286.59	3109.8	0.724576	0.00385664	0.946208	0.204308	1.35588	0.00724202	1.03829	0.0307356	2	2	7.0699	SUMO-conjugating enzyme UBC9 OS=Mus musculus GN=Ube2i
P51661	Hsd11b2	8412.95	7834.04	7672.36	10264.4	11779.7	10852.4	9109.58	9286.62	8888.94	9177.59	8935.96	9116.29	7973.12	10965.5	9095.05	9076.61	1.37531	0.0243259	0.997973	0.924559	0.827742	0.0687022	1.14071	0.0397181	9	3	51.7034	Corticosteroid 11-beta-dehydrogenase isozyme 2 OS=Mus musculus GN=Hsd11b2
O70423	Aoc3	11466.9	11625	11087.3	13076.3	12463	11845	10348	10622.7	9983.77	10487.6	9953.21	9948.45	11393.1	12461.4	10318.2	10129.7	1.09377	0.117847	0.98174	0.579809	0.812889	0.0214106	0.905653	0.00211912	9	5	61.5745	Membrane primary amine oxidase OS=Mus musculus GN=Aoc3
P62137	Ppp1ca	1318.03	1234.95	1307.61	2764.19	2549.9	2821.41	1077.07	967.704	894.981	790.967	908.409	921.963	1286.86	2711.84	979.917	873.78	2.10732	0.00836767	0.891687	0.264042	0.32221	0.00247188	0.761478	0.0358117	3	1	15.7468	Serine/threonine-protein phosphatase PP1-alpha catalytic subunit OS=Mus musculus GN=Ppp1ca
P18572	Bsg	17736	17827.9	18013.8	22958.8	22792.2	23277.2	16077.2	16591.8	16307.2	19059.7	19469.8	19756.9	17859.2	23009.4	16325.4	19428.8	1.28838	0.00136864	1.1901	0.00616304	0.844386	0.00226408	0.914113	0.00990356	12	8	83.8134	Basigin OS=Mus musculus GN=Bsg
Q9CPU4	Mgst3	2232.69	2289.86	2008.66	3207.14	3241.05	3097.69	1881.13	1885.49	1746.9	2593.35	2756.83	2589.85	2177.07	3181.96	1837.84	2646.68	1.46158	0.00957267	1.44011	0.00622043	0.831776	0.0072816	0.844179	0.00874182	2	1	13.2684	Microsomal glutathione S-transferase 3 OS=Mus musculus GN=Mgst3
P48678	Lmna	148361	150026	150459	128775	129061	131592	193733	193623	194414	156771	159196	162415	149615	129809	193923	159461	0.867619	0.00232381	0.822288	0.0124867	1.22842	0.00299607	1.29614	0.000206338	73	41	491.057	Prelamin-A/C OS=Mus musculus GN=Lmna
O88428	Papss2	15043.5	15122.8	15846.5	15583.5	15927.4	15520.1	16898.4	16174.9	16369.8	13741.3	13899.3	13944.6	15337.6	15677	16481.1	13861.7	1.02213	0.380596	0.841069	0.0196335	0.884207	0.00528268	1.07455	0.0975347	20	11	126.234	Bifunctional 3'-phosphoadenosine 5'-phosphosulfate synthase 2 OS=Mus musculus GN=Papss2
P24549	Aldh1a1	57265	56859.4	56346.4	67077.2	65215.2	65786.1	57311.4	56515.4	57615.2	61905.5	60547.2	63034.4	56823.6	66026.1	57147.4	61829	1.16195	0.00587957	1.08192	0.0356389	0.936433	0.0228578	1.0057	0.574716	37	12	221.702	Retinal dehydrogenase 1 OS=Mus musculus GN=Aldh1a1
P01837	Ig kappa chain C region	2191.21	2289.33	1924.92	4645.78	3847.85	4296.27	3828.96	4073.25	3742.55	3102.43	2931.74	2856.23	2135.15	4263.3	3881.59	2963.47	1.99672	0.015502	0.763468	0.0145893	0.695112	0.03692	1.81794	0.00301185	4	2	26.3067	Ig kappa chain C region OS=Mus musculus
Q91WK5	Gcsh	502.834	592.208	469.156	118.041	80.195	52.9794	510.759	314.854	367.801	639.727	715.141	583.426	521.399	83.7383	397.805	646.098	0.160603	0.00921944	1.62416	0.0648511	7.71568	0.00497574	0.762956	0.267219	1	1	5.4431	Glycine cleavage system H protein, mitochondrial OS=Mus musculus GN=Gcsh
Q7TSV4	Pgm2	28460.8	29127.6	29569.5	46421.7	46006	47518.7	28762.5	27566.4	28100.1	25918	25099.6	27057.1	29052.7	46648.8	28143	26024.9	1.60566	0.000942299	0.924738	0.0825335	0.55789	0.000518623	0.968689	0.272362	26	7	142.202	Phosphoglucomutase-2 OS=Mus musculus GN=Pgm2
P61089	Ube2n	11472.8	11964.3	11743.6	8365.92	8607.05	8384.71	9334.73	9596.68	9598.5	10417	10721	10862.2	11726.9	8452.56	9509.97	10666.7	0.720785	0.00314256	1.12164	0.0166734	1.26195	0.00301328	0.810955	0.000731193	7	5	58.4995	Ubiquitin-conjugating enzyme E2 N OS=Mus musculus GN=Ube2n
P11157	Rrm2	1155.67	864.667	950.327	12450	12848.8	13477.6	622.152	1003.53	622.203	388.353	561.824	494.778	990.222	12925.4	749.295	481.651	13.0531	0.0034986	0.642807	0.22368	0.0372638	0.0029426	0.756694	0.325294	1	1	11.2704	Ribonucleoside-diphosphate reductase subunit M2 OS=Mus musculus GN=Rrm2
P29391	Ftl1	5385.41	5020.03	5067.2	6360.93	5706.07	5732.03	3367.75	3629.27	3740.56	5196.28	5125.03	4756.55	5157.55	5933.01	3579.19	5025.95	1.15035	0.0802085	1.40421	0.0108915	0.847117	0.0481144	0.693972	0.019741	3	3	17.6143	Ferritin light chain 1 OS=Mus musculus GN=Ftl1
P48758	Cbr1	26931.4	26245.5	26751.8	25416.1	25649.1	25261.1	28090.8	26077	26242.7	33017.8	32851.8	32903.8	26642.9	25442.1	26803.5	32924.4	0.95493	0.0308519	1.22836	0.0337953	1.29409	0.000697316	1.00603	0.796391	13	8	93.3409	Carbonyl reductase [NADPH] 1 OS=Mus musculus GN=Cbr1
Q99MQ4	Aspn	42593.5	43761.2	44006.3	48149.1	46286.6	48183.6	50216.2	51066.9	51562	42420.4	42675.7	43015.3	43453.7	47539.8	50948.4	42703.8	1.09403	0.0228114	0.838178	0.00690241	0.898275	0.0232242	1.17248	0.000350097	16	11	118.701	Asporin OS=Mus musculus GN=Aspn
B2RWW0	Tagap	4077.83	4420.22	4257.41	5621.27	5529.84	5755.72	4259.55	4498.69	4616.32	3806.62	3696.42	3864.05	4251.82	5635.61	4458.18	3789.03	1.32546	0.00530988	0.849905	0.0361116	0.672337	0.000912042	1.04853	0.123311	4	2	14.4464	T-cell activation Rho GTPase-activating protein OS=Mus musculus GN=Tagap
P61161	Actr2	22027.7	22646.9	23307.8	21077.8	20647.8	20716.4	22890.9	23763.7	23867.7	22840.6	21790.8	21804.2	22660.8	20814	23507.4	22145.2	0.918502	0.0513949	0.942051	0.0826434	1.06396	0.069488	1.03736	0.0352474	15	6	87.086	Actin-related protein 2 OS=Mus musculus GN=Actr2
Q64442	Sord	7926.68	7416.99	7377.82	23916.6	24898.9	21840.7	9767.14	9514.01	9919.24	9509.33	8955.64	9619.54	7573.83	23552.1	9733.46	9361.5	3.10966	0.0105027	0.961785	0.280303	0.397481	0.00882163	1.28514	0.00991007	5	4	32.494	Sorbitol dehydrogenase OS=Mus musculus GN=Sord
P02088	Hbb-b1	224381	224113	218267	228415	231416	231911	187769	188823	182330	215001	218412	222182	222254	230580	186307	218532	1.03747	0.0611826	1.17296	0.00585745	0.947746	0.0261463	0.838264	0.000218539	32	20	109.662	Hemoglobin subunit beta-1 OS=Mus musculus GN=Hbb-b1
Q05793	Hspg2	34791.6	34130.9	34700.8	38483	38339.5	38663.3	37970.7	38060.2	38320.4	38695.5	38415.5	39083.5	34541.1	38495.3	38117.1	38731.5	1.11448	0.0051854	1.01612	0.112554	1.00614	0.39944	1.10353	0.00396493	58	17	309.454	Basement membrane-specific heparan sulfate proteoglycan core protein OS=Mus musculus GN=Hspg2
Q61033	Tmpo	13089.1	12687.9	13027.8	13379	14032.6	14173.4	15217.5	15004.2	15772.3	15828	16298.6	17047.7	12934.9	13861.7	15331.3	16391.4	1.07165	0.0744701	1.06915	0.126436	1.1825	0.0146906	1.18527	0.00474518	15	2	120.193	Lamina-associated polypeptide 2, isoforms alpha/zeta OS=Mus musculus GN=Tmpo
Q9R0H5	Krt71	296.567	391.206	388.02	727.397	817.519	799.455	177.135	45.5754	172.933	63.8867	118.392	224.996	358.598	781.457	131.881	135.758	2.1792	0.00491945	1.0294	0.963667	0.173725	0.00460729	0.367769	0.148046	31	1	204.598	Keratin, type II cytoskeletal 71 OS=Mus musculus GN=Krt71
P12787	Cox5a	13098.2	12597.8	13044.6	18966.5	19505.2	19490.4	9925.04	10712.9	10462.8	10096.2	10437.9	9871.61	12913.5	19320.7	10366.9	10135.2	1.49616	0.000934275	0.977651	0.542403	0.524579	0.00028337	0.802796	0.0221453	10	5	85.6871	Cytochrome c oxidase subunit 5A, mitochondrial OS=Mus musculus GN=Cox5a
P97372	Psme2	17813.4	17927.5	18458.5	15678.8	15599.9	16122.4	16435.1	17641.1	17190.5	15615.1	15829.9	15079.7	18066.5	15800.3	17088.9	15508.2	0.874567	0.006857	0.907504	0.0584553	0.981513	0.399287	0.945891	0.10849	11	4	60.9109	Proteasome activator complex subunit 2 OS=Mus musculus GN=Psme2
P35283	Rab12	3379.92	3367.28	3092.36	5395.41	5138.43	5464.49	4519.94	4598.76	5032.01	3327.11	3635.59	3514.36	3279.85	5332.78	4716.91	3492.35	1.62592	0.00232381	0.740391	0.0237679	0.654884	0.00182457	1.43815	0.0281202	7	2	44.2558	Ras-related protein Rab-12 OS=Mus musculus GN=Rab12
Q61765	Krt31	3156.27	3696.49	3655.17	11616.7	11117.1	10217.5	3775.41	3850.72	4230.4	4133.92	4270.32	3930.3	3502.64	10983.8	3952.18	4111.51	3.13586	0.00592315	1.04032	0.489345	0.374326	0.00797336	1.12834	0.0995444	22	5	138.507	Keratin, type I cuticular Ha1 OS=Mus musculus GN=Krt31
Q8K4Z5	Sf3a1	2705.64	2728.18	2921.06	2610.52	2557.05	2533.8	2422.86	2344.69	2649.61	2651.58	2523.68	2383.14	2784.96	2567.12	2472.39	2519.47	0.921781	0.112956	1.01904	0.766417	0.981437	0.64978	0.887765	0.0179454	10	2	63.8129	Splicing factor 3A subunit 1 OS=Mus musculus GN=Sf3a1
Q9ERE2	Krt81	62.5526	16.9625	0	8758.69	9875.08	10292.3	77.73	192.198	183.658	158.812	179.896	55.9862	26.505	9642.04	151.195	131.565	363.781	0.010197	0.870163	0.778213	0.0136449	0.00770027	5.7044	0.22736	28	2	88.4814	Keratin, type II cuticular Hb1 OS=Mus musculus GN=Krt81
Q497I4	Krt35	1223.89	1367.55	1513.66	46708.2	47564.6	48839.3	566.077	591.477	907.603	828.409	951.056	1030	1368.37	47704	688.386	936.487	34.862	0.00244688	1.36041	0.202729	0.0196312	0.00178451	0.503072	0.0192836	14	3	73.9308	Keratin, type I cuticular Ha5 OS=Mus musculus GN=Krt35
Q76MZ3	Ppp2r1a	21054.1	21173.8	21103.3	20494.9	20412.4	20738	25962.1	25650.9	25334	32100.8	32023.1	30776.7	21110.4	20548.4	25649	31633.5	0.973379	0.040481	1.23332	0.0119232	1.53946	0.00459974	1.21499	0.00163207	19	8	116.75	Serine/threonine-protein phosphatase 2A 65 kDa regulatory subunit A alpha isoform OS=Mus musculus GN=Ppp2r1a
P12367	Prkar2a	14637.8	14545.7	14641.1	14662	14736.1	14702.2	13822.4	15358.3	15230.4	15030.2	14906.4	14263	14608.2	14700.1	14803.7	14733.2	1.00629	0.121812	0.995236	0.92822	1.00225	0.915149	1.01338	0.761317	8	4	59.9726	cAMP-dependent protein kinase type II-alpha regulatory subunit OS=Mus musculus GN=Prkar2a
Q9CQR4	Acot13	42180.3	41136.6	42262.2	43934	42933.8	44790.2	104198	105691	106813	95096.6	96780.1	97859.3	41859.7	43886	105567	96578.7	1.04841	0.0725313	0.914853	0.0102922	2.20067	0.00028337	2.52194	0.000151616	14	6	59.2166	Acyl-coenzyme A thioesterase 13 OS=Mus musculus GN=Acot13
P32261	Serpinc1	4140.17	4044.4	3774.54	2924.26	2751.36	2686.94	3267.43	3294.07	3081.55	3007.82	2966.61	2729.95	3986.37	2787.52	3214.35	2901.46	0.699263	0.00825548	0.902659	0.0905279	1.04088	0.412122	0.806335	0.00257276	10	3	70.3906	Antithrombin-III OS=Mus musculus GN=Serpinc1
Q91ZJ5	Ugp2	23627.2	23961.9	25057.3	28102	28753.8	29766.3	24932.4	25579	26625.7	23110.3	23552.2	24160.1	24215.4	28874.1	25712.4	23607.5	1.19238	0.00972333	0.918138	0.0646508	0.817603	0.00662052	1.06182	0.00311568	20	9	91.8865	UTP--glucose-1-phosphate uridylyltransferase OS=Mus musculus GN=Ugp2
P28654	Dcn	27854.2	28036.1	28528.9	26845.3	26163.3	26125.2	38639.1	38171.4	39212.7	29073.1	27917.1	29221	28139.7	26377.9	38674.4	28737.1	0.937391	0.0169383	0.743051	0.00339339	1.08944	0.0258156	1.37437	0.000287716	15	8	76.768	Decorin OS=Mus musculus GN=Dcn
Q3UNX5	Acsm3	8572.42	9114.58	9160.75	6582.94	6249.26	6741.82	11493.6	11988.4	12843.8	9807.13	9334.9	10056.9	8949.25	6524.67	12108.6	9732.99	0.729075	0.00558409	0.803808	0.0366469	1.49172	0.00301328	1.35303	0.00390941	12	6	68.9972	Acyl-coenzyme A synthetase ACSM3, mitochondrial OS=Mus musculus GN=Acsm3
O08638	Myh11	402855	395833	382137	416134	407613	397802	436066	432483	416938	400886	398600	388078	393609	407183	428496	395854	1.03449	0.219944	0.923823	0.0387036	0.972178	0.2028	1.08863	0.00116864	198	93	1341.56	Myosin-11 OS=Mus musculus GN=Myh11
P68040	Gnb2l1	28578.8	29154.9	28697.7	29079	28410.2	29294.3	35906.2	36406	35075.8	30985	31054.2	30680.5	28810.5	28927.8	35796	30906.6	1.00407	0.781759	0.863409	0.0180346	1.0684	0.0188409	1.24247	0.00147727	17	10	103.474	Guanine nucleotide-binding protein subunit beta-2-like 1 OS=Mus musculus GN=Gnb2l1
Q99JI6	Rap1b	3682.96	3910.75	3988.91	3582.67	3944.37	4095.26	4910.3	4886.65	4890.42	4295	4133.78	4216.42	3860.87	3874.1	4895.79	4215.07	1.00343	0.960889	0.860958	0.0190085	1.08801	0.179399	1.26805	0.0111797	12	1	80.9034	Ras-related protein Rap-1b OS=Mus musculus GN=Rap1b
Q9WUA3	Pfkp	15553.3	15039.6	14761.1	12888.4	12636.3	12580.7	16335	16643.1	16872.2	14102.5	14507	15178.5	15118	12701.8	16616.8	14596	0.840176	0.0144717	0.878388	0.0345369	1.14913	0.0333817	1.09914	0.0616268	11	5	81.7296	6-phosphofructokinase type C OS=Mus musculus GN=Pfkp
A2CG49	Kalrn	3220.84	3652.4	3876.92	623.923	773.596	580.535	4218.69	3929.5	4262.51	3633.18	3507.05	3477.62	3583.38	659.351	4136.9	3539.28	0.184002	0.0103575	0.85554	0.0435972	5.36783	0.000316715	1.15447	0.143854	6	1	26.4463	Kalirin OS=Mus musculus GN=Kalrn
Q7TMK9	Syncrip	2578.44	2458.27	2698.6	7883.25	7957.45	8360.36	2018.5	2200.77	1954.9	1909.91	1516.81	1654.8	2578.44	8067.02	2058.06	1693.84	3.12865	0.0020503	0.823028	0.112628	0.209971	0.000411535	0.798181	0.0674335	11	3	53.8452	Heterogeneous nuclear ribonucleoprotein Q OS=Mus musculus GN=Syncrip
Q61646	Hp	7098.85	7145.41	7334.72	11689	11593.6	12129.4	7893.7	8233.55	7998.29	9682.14	9535.43	9567.72	7192.99	11804	8041.85	9595.1	1.64104	0.00335471	1.19315	0.0100688	0.812869	0.0100897	1.11801	0.0203218	14	5	88.4173	Haptoglobin OS=Mus musculus GN=Hp
P61620	Sec61a1	12525.9	13133.5	12601.8	33624.5	33151.7	34320.8	15174.8	14825.6	15510.8	13699.2	13800.2	13747.2	12753.7	33699	15170.4	13748.9	2.64228	0.000816077	0.906295	0.0451138	0.40799	0.00227097	1.18949	0.0226697	7	5	45.8676	Protein transport protein Sec61 subunit alpha isoform 1 OS=Mus musculus GN=Sec61a1
Q8BK48	Ces2e	31099.4	31304	30403.3	30786.8	31673.4	30608.3	29540.3	29383.5	27825.8	33924	33007.4	34433.9	30935.6	31022.8	28916.5	33788.4	1.00282	0.883281	1.16848	0.0155401	1.08915	0.0170606	0.934734	0.025145	16	6	112.124	Pyrethroid hydrolase Ces2e OS=Mus musculus GN=Ces2e
P60867	Rps20	1693.57	1833.02	1787.13	411.915	512.393	446.239	674.673	775.002	488.067	849.224	849.414	878.317	1771.24	456.849	645.914	858.985	0.257926	0.00117472	1.32988	0.186023	1.88024	0.00867248	0.364668	0.0173173	2	1	17.3659	40S ribosomal protein S20 OS=Mus musculus GN=Rps20
O35129	Phb2	13209.3	13097.2	13712.7	14525.2	15013.7	14882.1	16877.8	16740.6	17282.1	15113.3	15108.3	15584.8	13339.7	14807	16966.8	15268.8	1.10999	0.015502	0.89992	0.0119232	1.03119	0.127682	1.2719	0.000371512	14	6	63.638	Prohibitin-2 OS=Mus musculus GN=Phb2
O35841	Api5	1868.37	1547.41	1732.15	1621.04	1665.06	1846.15	914.493	873.053	815.622	824.213	856.856	771.845	1715.98	1710.75	867.723	817.638	0.996954	0.976239	0.94228	0.331352	0.477941	0.00867248	0.505672	0.0064716	7	2	33.4479	Apoptosis inhibitor 5 OS=Mus musculus GN=Api5
Q62095	Ddx3y	4350.91	4095.22	3707.19	4275.21	4780.17	4589.26	5788.55	5786.96	5687.2	5047.07	4906.16	5227.18	4051.1	4548.21	5754.24	5060.14	1.12271	0.153677	0.879376	0.0334388	1.11256	0.0745077	1.42041	0.0133964	14	1	84.1747	ATP-dependent RNA helicase DDX3Y OS=Mus musculus GN=Ddx3y
Q9D0E1	Hnrnpm	27769.1	28108.9	27385.1	24908.8	23366	23977.5	26181.8	26234.5	26560.8	31109.4	31952.5	32111.5	27754.4	24084.1	26325.7	31724.5	0.867759	0.0194125	1.20507	0.010059	1.31724	0.00247188	0.948526	0.0443181	42	13	310.533	Heterogeneous nuclear ribonucleoprotein M OS=Mus musculus GN=Hnrnpm
Q3V3R4	Itga1	3426.96	3573.67	3503.97	3161.06	3147.55	3108.67	4235.81	3824.57	3974.92	3213.51	3277.73	3257.94	3501.53	3139.1	4011.76	3249.73	0.896492	0.0215965	0.81005	0.0522676	1.03524	0.0232242	1.14572	0.0837859	6	2	32.5801	Integrin alpha-1 OS=Mus musculus GN=Itga1
P51855	Gss	5137.24	4742.96	5165.77	4429.31	4619.11	4619.51	5230.01	5387.04	5668.21	4490.83	4538.52	5256.54	5015.32	4555.98	5428.42	4761.96	0.908412	0.0953321	0.877228	0.150879	1.04521	0.539145	1.08237	0.133352	12	4	94.0902	Glutathione synthetase OS=Mus musculus GN=Gss
Q8BP47	Nars	29111.3	30312	31080.2	34080.2	35619.8	37068	41530	40235.6	41186.9	37527.2	37214	38172.3	30167.8	35589.3	40984.2	37637.8	1.17971	0.0242863	0.91835	0.0166734	1.05756	0.163548	1.35854	0.00622376	14	6	89.177	Asparagine--tRNA ligase, cytoplasmic OS=Mus musculus GN=Nars
P15331	Prph	6534.72	6937.78	7150.38	3627.56	3711.87	3663.06	2608.14	2836.32	2544.15	3444.63	3765.52	4057.55	6874.29	3667.5	2662.87	3755.9	0.533509	0.0113724	1.41047	0.036551	1.0241	0.703917	0.387367	0.00203442	34	8	220.169	Peripherin OS=Mus musculus GN=Prph
P30275	Ckmt1	72733.8	72881.7	74546.5	63002.7	62095.7	63226.1	65265.6	63003.5	66055.5	67720.4	67030.6	68490.3	73387.3	62774.8	64774.9	67747.1	0.855391	0.00406968	1.04589	0.110771	1.07921	0.00462161	0.882644	0.00760023	31	15	191.71	Creatine kinase U-type, mitochondrial OS=Mus musculus GN=Ckmt1
Q9JJ06	C1galt1	5021.87	5080.26	5035.27	4711.47	4829.2	4978.5	5255.37	5470.95	5183.56	4891.2	4846.53	4752.57	5045.8	4839.72	5303.29	4830.1	0.959159	0.154845	0.910774	0.0460157	0.998012	0.928606	1.05103	0.0639896	10	5	75.4022	Glycoprotein-N-acetylgalactosamine 3-beta-galactosyltransferase 1 OS=Mus musculus GN=C1galt1
Q61233	Lcp1	7586.46	6872.33	7177.02	7198.75	7224.24	6990.62	9137.12	8516.3	8079.25	9480.86	9907.13	9645.16	7211.94	7137.87	8577.55	9677.72	0.989729	0.806291	1.12826	0.0968703	1.35583	0.00221325	1.18935	0.0260691	22	7	136.237	Plastin-2 OS=Mus musculus GN=Lcp1
Q9ERD7	Tubb3	1075.79	887.685	793.477	591.993	536.451	599.629	223.474	197.37	178.87	62.5618	63.292	146.719	918.983	576.024	199.905	90.8577	0.626806	0.0789725	0.454505	0.0808875	0.157732	0.00230666	0.217528	0.000275707	12	1	122.753	Tubulin beta-3 chain OS=Mus musculus GN=Tubb3
P15947	Klk1	6780.2	6731.54	6883.94	7229.74	6940.56	6945.83	8885.41	8296.36	9151.81	8776.57	8795.71	9233.4	6798.56	7038.71	8777.86	8935.23	1.03532	0.157498	1.01793	0.686352	1.26944	0.00464791	1.29114	0.00821364	2	1	25.5712	Kallikrein-1 OS=Mus musculus GN=Klk1
P62897	Cycs	38824.3	42602.5	44486.1	56891.3	55117.3	56798	48281.1	47494.3	49214	35874.8	35205.9	35901.2	41970.9	56268.9	48329.8	35660.6	1.34066	0.0223398	0.73786	0.00559771	0.633754	0.00181251	1.15151	0.0636017	16	9	110.127	Cytochrome c, somatic OS=Mus musculus GN=Cycs
Q9R0K7	Atp2b2	2902.29	2767.41	2895.35	2604.92	2634.58	2581.25	1960.46	1977.28	2060.41	1680.67	1657.46	1836.06	2855.02	2606.92	1999.38	1724.73	0.913101	0.0418543	0.862631	0.0522081	0.661598	0.00810731	0.700306	0.00256565	6	2	37.814	Plasma membrane calcium-transporting ATPase 2 OS=Mus musculus GN=Atp2b2
O35114	Scarb2	3980.36	3801.17	3563.11	5747.25	5617.95	5585.86	4358.35	3824.19	4187.05	4189.18	4415.28	4656.22	3781.55	5650.35	4123.2	4420.23	1.49419	0.00765674	1.07204	0.2997	0.782292	0.014945	1.09035	0.195386	6	1	30.918	Lysosome membrane protein 2 OS=Mus musculus GN=Scarb2
Q9DB77	Uqcrc2	83695.6	82871.5	82951.8	66581.8	68329	69393.3	88004.1	89841.9	88894.2	87400.8	89252.8	84526.3	83173	68101.4	88913.4	87060	0.818792	0.00754668	0.979155	0.387601	1.27839	0.00441987	1.06902	0.017369	28	15	188.077	Cytochrome b-c1 complex subunit 2, mitochondrial OS=Mus musculus GN=Uqcrc2
Q91YQ5	Rpn1	35488.6	36344.6	36115	32760.7	32397	33551.5	37234	36760	38219.1	35414.5	35143	35112.2	35982.7	32903.1	37404.4	35223.2	0.914412	0.0110863	0.941687	0.0666727	1.07052	0.0280759	1.03951	0.108262	33	15	204.43	Dolichyl-diphosphooligosaccharide--protein glycosyltransferase subunit 1 OS=Mus musculus GN=Rpn1
P70398	Usp9x	2113.24	2171.65	2077.6	2555.83	2566.95	2836.92	4949.13	5272.92	5708.71	5276.75	5333.77	5524.7	2120.83	2653.23	5310.25	5378.41	1.25103	0.0432072	1.01283	0.829873	2.02712	0.000741137	2.50386	0.00277644	9	3	41.4271	Probable ubiquitin carboxyl-terminal hydrolase FAF-X OS=Mus musculus GN=Usp9x
Q61081	Cdc37	8727.6	8590.68	8797.47	8764.09	8800.16	8711.48	9878.93	9897.77	9503	8498.95	8142.72	8476.91	8705.25	8758.58	9759.9	8372.86	1.00613	0.542891	0.857884	0.0107426	0.955961	0.0978409	1.12115	0.0272035	9	4	66.6673	Hsp90 co-chaperone Cdc37 OS=Mus musculus GN=Cdc37
P32020	Scp2	48750.8	49321.6	51233.6	56621.2	54690.8	57083.6	52230.1	52953.2	53354.8	52421.2	52265.2	53065.8	49768.7	56131.9	52846	52584.1	1.12786	0.0141103	0.995043	0.63143	0.936795	0.0472713	1.06183	0.0256405	32	8	213.466	Non-specific lipid-transfer protein OS=Mus musculus GN=Scp2
Q99LC5	Etfa	72715.7	70023.6	67700.7	64794.6	63175	63480	69610.4	69194.8	66886.7	74981.2	75134.1	74282.2	70146.7	63816.5	68564	74799.2	0.909758	0.0665956	1.09094	0.0362702	1.1721	0.00231802	0.977437	0.165976	25	16	195.209	Electron transfer flavoprotein subunit alpha, mitochondrial OS=Mus musculus GN=Etfa
Q8C8R3	Ank2	2472.41	2302.62	2190.83	3228.29	3413.66	2996.98	2498.18	2313.56	2652.78	2282.31	2282.26	2369.86	2321.95	3212.98	2488.17	2311.48	1.38374	0.0178995	0.928986	0.27834	0.719419	0.0256142	1.07159	0.378162	17	6	70.8258	Ankyrin-2 OS=Mus musculus GN=Ank2
Q8K0C5	Zg16	28063.6	28233.2	28720.8	27796	27472.1	28726.3	28127.9	28297.7	27708	31672.7	31737.4	32163.5	28339.2	27998.1	28044.5	31857.9	0.987965	0.539282	1.13597	0.00346415	1.13786	0.0110508	0.989602	0.49818	11	7	70.6038	Zymogen granule membrane protein 16 OS=Mus musculus GN=Zg16
Q9WVA4	Tagln2	67330.1	66173.9	64798.8	61896.6	61878.6	62417.2	79068.3	78141.2	75989.2	69935.5	69654.7	70722.4	66100.9	62064.1	77732.9	70104.2	0.93893	0.0500968	0.90186	0.0280068	1.12954	0.00178451	1.17597	0.00017015	19	16	150.619	Transgelin-2 OS=Mus musculus GN=Tagln2
P38647	Hspa9	105423	105518	105433	108560	109093	110504	119883	121281	121764	110149	109981	108321	105458	109386	120976	109484	1.03724	0.0426876	0.905006	0.00443764	1.0009	0.92232	1.14715	0.00110831	50	28	354.777	Stress-70 protein, mitochondrial OS=Mus musculus GN=Hspa9
Q9QYR6	Map1a	4556.34	4267.38	4313.59	4219.81	4328.38	4513.79	4858.38	4383.29	4174.76	4159.87	3725.34	3851.17	4379.1	4353.99	4472.14	3912.13	0.994266	0.883281	0.874776	0.144673	0.898514	0.0773837	1.02125	0.562312	6	3	19.8161	Microtubule-associated protein 1A OS=Mus musculus GN=Map1a
Q9QXK3	Copg2	581.144	679.593	676.566	775.96	720.178	767.291	735.34	613.737	692.55	540.879	595.915	701.351	645.768	754.476	680.542	612.715	1.16834	0.0932926	0.900334	0.396159	0.812107	0.107372	1.05385	0.648559	1	1	4.1442	Coatomer subunit gamma-2 OS=Mus musculus GN=Copg2
P80315	Cct4	24880.9	25333.9	25069.2	42722.4	40832.4	41600.4	20031.8	20132.6	20563.1	18854.5	18475.5	18326.2	25094.7	41718.4	20242.5	18552.1	1.66244	0.00517112	0.91649	0.0119232	0.444697	0.00213855	0.806646	0.00182293	21	10	126.102	T-complex protein 1 subunit delta OS=Mus musculus GN=Cct4
Q80Z19	Muc2	84223.6	82325.4	86690.1	108597	110645	112712	107256	110313	111875	95134.7	94765.2	96211.3	84413	110651	109815	95370.4	1.31083	0.00232381	0.868467	0.0215449	0.861901	0.00867248	1.30092	0.00333745	45	31	258.286	Mucin-2 (Fragments) OS=Mus musculus GN=Muc2
O55142	Rpl35a	2757.69	2801.53	2820.92	2496.15	2532.71	2603.7	1325.68	1414.03	1293.41	1328.54	1621.69	1485.16	2793.38	2544.19	1344.37	1478.47	0.910792	0.0170035	1.09974	0.324241	0.581116	0.00880976	0.481271	0.00143212	2	2	12.944	60S ribosomal protein L35a OS=Mus musculus GN=Rpl35a
Q6PB66	Lrpprc	53329.9	51831.7	50303.5	37469.4	37813.5	38722.6	55452.6	54627.1	50591.6	56530.4	54788.3	53642.6	51821.7	38001.8	53557.1	54987.1	0.733319	0.0070606	1.0267	0.54116	1.44696	0.00329903	1.03349	0.14509	38	17	237.156	Leucine-rich PPR motif-containing protein, mitochondrial OS=Mus musculus GN=Lrpprc
P26883	Fkbp1a	15322.3	14943.9	14564.4	16213.2	16831.5	17068.2	20900.5	19689.1	21930.8	17948.1	17607.9	17957.9	14943.5	16704.3	20840.2	17838	1.11783	0.0205889	0.855943	0.0777153	1.06787	0.0486426	1.39459	0.014226	8	3	47.0005	Peptidyl-prolyl cis-trans isomerase FKBP1A OS=Mus musculus GN=Fkbp1a
P17156	Hspa2	3766.12	3929.02	3934.15	4800.12	4997.88	4817.91	3337.59	4166.03	3890.68	4041.71	4167.06	4504.09	3876.43	4871.97	3798.1	4237.62	1.25682	0.00397065	1.11572	0.280988	0.869796	0.0454405	0.979793	0.68569	48	4	316.16	Heat shock-related 70 kDa protein 2 OS=Mus musculus GN=Hspa2
O35855	Bcat2	2785.76	2830.06	2646.1	2796.28	2658.64	2823.34	1756.59	2200.85	1768.06	1671.54	1699.34	1697.27	2753.97	2759.42	1908.5	1689.39	1.00198	0.960889	0.88519	0.347152	0.612226	0.00678599	0.692998	0.0271116	5	3	28.0481	Branched-chain-amino-acid aminotransferase, mitochondrial OS=Mus musculus GN=Bcat2
Q8VIJ6	Sfpq	26248.2	27898.9	27861.8	25968.9	26025.6	26019	27274.5	28625.2	28581.9	29319.5	29382	27873.1	27336.3	26004.5	28160.5	28858.2	0.951281	0.181781	1.02478	0.430008	1.10974	0.0454266	1.03015	0.0196475	18	10	107.979	Splicing factor, proline- and glutamine-rich OS=Mus musculus GN=Sfpq
Q64310	Surf4	772.393	851.837	754.456	626.423	571.341	608.761	1422.05	1296.7	1199.36	1067.01	1118.66	1142.04	792.895	602.175	1306.04	1109.24	0.759463	0.0267009	0.849314	0.13057	1.84205	0.00144426	1.64718	0.0130885	2	1	12.4816	Surfeit locus protein 4 OS=Mus musculus GN=Surf4
P31809	Ceacam1	4090.46	4167.29	3873.31	3165.15	3111.64	2762.49	6301.14	5874.29	5674.42	6048.62	6077.4	6215.27	4043.69	3013.09	5949.95	6113.76	0.745135	0.014296	1.02753	0.547224	2.02907	0.0029426	1.47142	0.00440775	8	2	53.4924	Carcinoembryonic antigen-related cell adhesion molecule 1 OS=Mus musculus GN=Ceacam1
P29758	Oat	31212.7	30875.4	32007.9	24977	26179	26066.8	34652.3	35023.7	35981.4	27585.5	28014	28171	31365.3	25740.9	35219.1	27923.5	0.820681	0.00427505	0.79285	0.00844209	1.08479	0.0297968	1.12287	0.00288755	21	12	156.614	Ornithine aminotransferase, mitochondrial OS=Mus musculus GN=Oat
Q9D8W5	Psmd12	2450.25	2203.94	2320.2	2464.38	2329.15	2509.67	2843.09	2732.49	2848.16	2657.89	2408.31	2510.33	2324.8	2434.4	2807.91	2525.51	1.04715	0.349866	0.899425	0.0784798	1.03742	0.418209	1.20781	0.0116383	7	2	41.2102	26S proteasome non-ATPase regulatory subunit 12 OS=Mus musculus GN=Psmd12
Q68FD5	Cltc	85454.7	85616.2	83393.2	76230.6	78192.5	77158.1	91176	90023.6	88149.4	96955	95359.5	94005.9	84821.4	77193.7	89783	95440.1	0.910074	0.00765674	1.06301	0.0326148	1.23637	0.00178451	1.0585	0.00560335	55	29	414.53	Clathrin heavy chain 1 OS=Mus musculus GN=Cltc
P26039	Tln1	42749.9	43449.4	41844.4	43028.6	42287.6	42111.5	47064	45476.8	43781.3	37692.8	37572	39143.3	42681.2	42475.9	45440.7	38136.1	0.995189	0.776248	0.839249	0.0245805	0.897828	0.0114047	1.06465	0.066324	76	21	492.822	Talin-1 OS=Mus musculus GN=Tln1
P24369	Ppib	74287.8	75984.6	75325.2	73094.4	70103.4	72306.9	90999.5	89825.6	89194.8	78190.4	78894.5	80450.5	75199.2	71834.9	90006.6	79178.5	0.955262	0.0743584	0.879696	0.00577314	1.10223	0.0102881	1.19691	0.00413011	23	14	166.426	Peptidyl-prolyl cis-trans isomerase B OS=Mus musculus GN=Ppib
P11352	Gpx1	439.172	355.793	64.6142	28.599	36.297	14.947	78.9601	0	23.5413	600.288	608.39	548.525	286.527	26.6143	34.1671	585.735	0.0928861	0.198354	17.1432	0.00339339	22.0082	0.00289479	0.119246	0.218204	5	1	30.8532	Glutathione peroxidase 1 OS=Mus musculus GN=Gpx1
Q80XN0	Bdh1	22650	22144.1	21859.8	15382.2	14766.5	14678	25326.2	25526.2	23962.9	25543.4	25639.2	24518.1	22218	14942.2	24938.4	25233.6	0.67253	0.000962008	1.01183	0.712317	1.68874	0.00122153	1.12244	0.0157269	9	4	66.2436	D-beta-hydroxybutyrate dehydrogenase, mitochondrial OS=Mus musculus GN=Bdh1
O08529	Capn2	2917.37	2666.24	2933.42	2700.44	2641.39	2782.92	3182.12	3258.15	3025.99	2592.81	2591.71	2807.83	2839.01	2708.25	3155.42	2664.12	0.953941	0.329241	0.844298	0.0274473	0.983704	0.66957	1.11145	0.16699	3	2	16.0557	Calpain-2 catalytic subunit OS=Mus musculus GN=Capn2
Q99KQ4	Nampt	2828.67	2957.18	2645.42	1831.47	1832.13	1970.32	1506.11	1351.3	1405.29	1530.26	1807.52	1629.33	2810.42	1877.97	1420.9	1655.7	0.668217	0.0115062	1.16525	0.132631	0.881643	0.121347	0.505581	0.00545629	8	3	36.5936	Nicotinamide phosphoribosyltransferase OS=Mus musculus GN=Nampt
Q91WG8	Gne	13106.8	14214.7	13615	12019.9	12100.8	12859.3	12677.4	13544.6	13569.7	14710.3	14231.9	14755.7	13645.5	12326.7	13263.9	14566	0.90335	0.064735	1.09817	0.0612813	1.18166	0.010851	0.972034	0.165449	19	9	109.417	Bifunctional UDP-N-acetylglucosamine 2-epimerase/N-acetylmannosamine kinase OS=Mus musculus GN=Gne
O89053	Coro1a	5894.07	5896.08	6322.97	5662.22	5691.09	5547.17	6779.51	6882.8	7447.45	5018.58	5167.69	5244.76	6037.71	5633.49	7036.59	5143.68	0.933051	0.136901	0.730991	0.0263468	0.913054	0.0138802	1.16544	0.00204335	6	4	41.8648	Coronin-1A OS=Mus musculus GN=Coro1a
Q9ET01	Pygl	1899.1	1945.99	1774.68	2409.75	2422.61	2220.65	1971.39	2105.81	2172.12	2923.5	2932.11	2853.44	1873.26	2351	2083.11	2903.01	1.25503	0.0177524	1.3936	0.0119232	1.2348	0.0166537	1.11202	0.165032	5	1	28.7639	Glycogen phosphorylase, liver form OS=Mus musculus GN=Pygl
O35639	Anxa3	13902.4	13225.6	13161.5	14238.3	14304.8	14575.4	13304.7	13129.6	12855.6	13333.3	12218.5	12406.3	13429.8	14372.8	13096.6	12652.7	1.07022	0.0718682	0.966106	0.404734	0.880323	0.0468334	0.975189	0.143249	22	13	140.055	Annexin A3 OS=Mus musculus GN=Anxa3
P27601	Gna13	3984.67	3839.5	4374.57	4886.8	5118.21	4983.44	5652.53	5849.32	5825.06	5224.85	5232.71	5124.81	4066.25	4996.15	5775.64	5194.12	1.22869	0.0363067	0.899316	0.0168073	1.03962	0.105366	1.42039	0.0119621	10	4	55.3293	Guanine nucleotide-binding protein subunit alpha-13 OS=Mus musculus GN=Gna13
P27659	Rpl3	16883.5	17307.5	17837.7	14743.7	14891.1	15087	8812.07	9485.6	8887.02	9679.76	9824.55	10641.8	17342.9	14907.2	9061.56	10048.7	0.859558	0.0208605	1.10894	0.106382	0.674081	0.0067714	0.522493	0.00179207	15	11	73.2097	60S ribosomal protein L3 OS=Mus musculus GN=Rpl3
Q91VC3	Eif4a3	3970.55	3716.68	3104.94	3100.49	3206.42	2860.34	4451.23	4131.59	4561.64	5381.13	4955	4783.55	3597.39	3055.75	4381.48	5039.89	0.849435	0.208958	1.15027	0.0842849	1.64931	0.00691829	1.21796	0.158652	19	4	130.463	Eukaryotic initiation factor 4A-III OS=Mus musculus GN=Eif4a3
P06728	Apoa4	5153.31	5132.68	5092.65	8502.34	7723.1	7395.91	4705.07	4959.15	5123.7	8407.21	8770.91	8061.54	5126.21	7873.78	4929.31	8413.22	1.53598	0.0317417	1.70678	0.00629086	1.06851	0.290278	0.961588	0.293274	22	6	147.025	Apolipoprotein A-IV OS=Mus musculus GN=Apoa4
Q09199	B4galnt2	20917.5	20721	20773.7	16733.9	17092.4	17333.7	23197	23855.4	24116.4	21347.3	22057.6	22108.6	20804.1	17053.3	23723	21837.8	0.819711	0.00598206	0.920535	0.0262736	1.28056	0.00188345	1.1403	0.0113143	22	12	138.02	Beta-1,4 N-acetylgalactosaminyltransferase 2 OS=Mus musculus GN=B4galnt2
P17563	Selenbp1	185426	186695	185347	182415	185400	186897	201298	200763	200038	206163	208839	200261	185823	184904	200700	205088	0.995057	0.623614	1.02186	0.295872	1.10916	0.0142012	1.08006	0.00128427	34	24	198.141	Selenium-binding protein 1 OS=Mus musculus GN=Selenbp1
P03921	Mtnd5	1872.97	1842.2	2011.27	1727.21	1646.98	1719.19	1531.85	1866.83	1749.37	1465.5	1526.15	1330.17	1908.81	1697.79	1716.02	1440.61	0.889449	0.0668357	0.839506	0.140268	0.848518	0.0493467	0.898997	0.228983	1	1	6.1545	NADH-ubiquinone oxidoreductase chain 5 OS=Mus musculus GN=Mtnd5 PE=3
Q99LX0	Park7	13281.3	13502.4	13420.2	11786.1	12872.8	12501	9831.77	10291.6	10082.1	12294	12668.2	12596.3	13401.3	12386.6	10068.5	12519.5	0.924284	0.121812	1.24344	0.0045547	1.01073	0.755854	0.751306	0.00086658	16	11	88.175	Protein DJ-1 OS=Mus musculus GN=Park7
Q9QYC0	Add1	9148.34	9176.77	8862.3	10181.1	9843.95	9762.31	10789.4	10469.3	10930.6	8918.16	9140.02	8941.04	9062.47	9929.1	10729.8	8999.74	1.09563	0.0210653	0.838763	0.0113696	0.9064	0.0165294	1.18398	0.0174445	12	6	62.5781	Alpha-adducin OS=Mus musculus GN=Add1
P50580	Pa2g4	36096.7	35771.2	36440.1	53426.7	54159.2	55503.4	35081.9	35896.2	35803.9	36241.3	35261.2	36633.5	36102.7	54363.1	35594	36045.3	1.50579	0.00428133	1.01268	0.488907	0.663048	0.000923599	0.985909	0.269404	15	10	91.9696	Proliferation-associated protein 2G4 OS=Mus musculus GN=Pa2g4
P26645	Marcks	5297.38	5223.55	5752.03	6509.6	6630.76	6387.28	7155.99	7846.25	7477.93	6392.9	6231.54	5813.07	5424.32	6509.21	7493.39	6145.84	1.2	0.0296433	0.820168	0.0267246	0.944176	0.194205	1.38144	0.01739	8	7	55.9482	Myristoylated alanine-rich C-kinase substrate OS=Mus musculus GN=Marcks
P31230	Aimp1	12298.2	11775.8	11978.1	5524.84	5100.99	4873.98	11235.6	11766.4	10930.5	10403.6	10344.6	10077.2	12017.4	5166.6	11310.8	10275.1	0.429928	0.000942299	0.908434	0.0734243	1.98876	0.00178451	0.941206	0.179946	9	3	68.429	Aminoacyl tRNA synthase complex-interacting multifunctional protein 1 OS=Mus musculus GN=Aimp1
P14148	Rpl7	2678.88	2810.98	2681.08	1478.1	1582.8	1478.43	266.534	500.763	307.544	890.04	1056.98	1052.51	2723.65	1513.11	358.281	999.841	0.555546	0.001322	2.79067	0.0155758	0.660784	0.00873099	0.131544	0.00712461	7	2	52.2293	60S ribosomal protein L7 OS=Mus musculus GN=Rpl7
Q9EQ06	Hsd17b11	6721.96	7214.19	7069.51	8301.29	7945.94	7598.59	6789.94	6903.86	6804.65	9142.28	8874.53	8875.56	7001.89	7948.61	6832.82	8964.13	1.13521	0.0457926	1.31192	0.00639739	1.12776	0.0391018	0.975854	0.295715	7	4	44.5165	Estradiol 17-beta-dehydrogenase 11 OS=Mus musculus GN=Hsd17b11
Q8CI43	Myl6b	7451.7	7656.11	7978.31	4815.21	5319.91	4757.42	3810.49	3707.79	3949.64	16023.6	15812.2	16292.4	7695.37	4964.18	3822.64	16042.8	0.645086	0.00406968	4.19677	0.000972234	3.2317	0.00028337	0.496745	0.000509351	17	4	126.503	Myosin light chain 6B OS=Mus musculus GN=Myl6b
Q9WU78	Pdcd6ip	45432.1	45550.1	47532.5	47679.9	46262.9	46622	46726.3	46888.4	46211.6	47243.9	46989.4	48507.7	46171.6	46854.9	46608.8	47580.3	1.0148	0.510699	1.02084	0.228554	1.01548	0.36107	1.00947	0.661383	31	16	192.749	Programmed cell death 6-interacting protein OS=Mus musculus GN=Pdcd6ip
Q8BTM8	Flna	292294	295397	300262	295293	289505	290138	309997	312280	313087	282144	281660	280973	295984	291645	311788	281592	0.985339	0.276077	0.903153	0.00555029	0.965532	0.0452657	1.05339	0.00985001	115	61	784.084	Filamin-A OS=Mus musculus GN=Flna
Q5FWK3	Arhgap1	7361.41	7139.75	6929.35	7683.73	7745.38	7439.58	8674.72	8615.04	8950.31	7029.71	7012.16	7431.44	7143.5	7622.9	8746.69	7157.77	1.06711	0.0714206	0.81834	0.00954242	0.938983	0.0789134	1.22443	0.0179284	10	4	44.2969	Rho GTPase-activating protein 1 OS=Mus musculus GN=Arhgap1
G5E870	Trip12	2810.16	2972.68	2823.08	2224.48	2098.51	2272.7	1969.76	2101.31	2094.96	3361.17	3187.64	3457.48	2868.64	2198.56	2055.34	3335.43	0.766412	0.00587957	1.62281	0.00790326	1.5171	0.00349332	0.716487	0.00282882	9	3	29.8962	E3 ubiquitin-protein ligase TRIP12 OS=Mus musculus GN=Trip12
Q9CQ19	Myl9	17107.8	17281.7	17210.4	19488.7	19299.4	19910	18962.7	18263.5	18134.3	14686.1	14923.6	15801.2	17200	19566	18453.5	15137	1.13756	0.0135992	0.820276	0.0127671	0.773636	0.00557864	1.07288	0.050582	25	3	185.55	Myosin regulatory light polypeptide 9 OS=Mus musculus GN=Myl9
Q9DCN2	Cyb5r3	6787.91	6491.48	6715.02	7023.8	7451.42	7060.09	8535.55	8345.07	8163.26	7486.66	6800.76	6914.07	6664.81	7178.44	8347.96	7067.16	1.07707	0.0733711	0.846574	0.0377457	0.984499	0.718423	1.25254	0.00516684	8	4	56.4998	NADH-cytochrome b5 reductase 3 OS=Mus musculus GN=Cyb5r3
O88342	Wdr1	50076.9	50922.9	51176.5	49573.8	49709.8	49688	61211.3	63907.6	65083.8	53582.3	53487.9	55027.4	50725.4	49657.2	63400.9	54032.5	0.978941	0.123207	0.852236	0.0257378	1.08811	0.0237208	1.24988	0.00272082	27	17	189.384	WD repeat-containing protein 1 OS=Mus musculus GN=Wdr1
Q6PDN3	Mylk	50183.7	48390.6	47565.4	38107.1	38251.3	37761.9	44109	42841.2	41210.9	45412.9	46034	42969	48713.2	38040.1	42720.4	44805.3	0.780899	0.014872	1.0488	0.24053	1.17784	0.0299939	0.876977	0.00232553	52	16	327.482	Myosin light chain kinase, smooth muscle OS=Mus musculus GN=Mylk
P06745	Gpi	51994.7	50644	52096.8	50489.6	50550.4	51721.3	59931.4	61545.5	59781.2	60063.4	58462.5	57500.4	51578.5	50920.4	60419.4	58675.4	0.987241	0.405288	0.971136	0.205811	1.1523	0.00849789	1.17141	0.0132927	26	12	155.374	Glucose-6-phosphate isomerase OS=Mus musculus GN=Gpi
Q8C2K5	Rasal3	4147.17	3860.91	4355.55	4079.6	4031.02	4391.63	3628.04	3819.49	3801.25	3453.95	3568.27	3473.12	4121.21	4167.41	3749.59	3498.45	1.01121	0.853928	0.93302	0.0696235	0.839477	0.0339227	0.909829	0.152253	9	2	41.9275	RAS protein activator like-3 OS=Mus musculus GN=Rasal3
P01887	B2m	4468.31	4790.72	4643.24	4105.92	3677.08	3550.66	7829.62	7282.2	6938.47	6323.29	6294.18	6101.08	4634.09	3777.88	7350.1	6239.52	0.815237	0.0403068	0.848902	0.0811876	1.65159	0.00629417	1.58609	0.0118036	3	2	36.9985	Beta-2-microglobulin OS=Mus musculus GN=B2m
Q9WTL2	Rab25	4802.5	4753.94	4951.59	4674.52	4777.53	4554.88	4172.11	4336.57	4179.36	3807.37	3683.86	4041.19	4836.01	4668.98	4229.35	3844.14	0.96546	0.17731	0.90892	0.0870009	0.823337	0.0125327	0.874553	0.0274172	3	1	15.9971	Ras-related protein Rab-25 OS=Mus musculus GN=Rab25
Q4U4S6	Xirp2	17615.8	17932.1	18707.8	21171.5	20612.5	21686.1	32212.6	34760.9	34927.7	30243.9	30024.3	31720	18085.2	21156.7	33967.1	30662.7	1.16983	0.0105452	0.902719	0.0812668	1.44932	0.00291009	1.87817	0.00073366	23	5	87.7223	Xin actin-binding repeat-containing protein 2 OS=Mus musculus GN=Xirp2
A2A863	Itgb4	13705.7	13139.1	13346.6	15504.2	16229.7	17195.3	16346.6	15868.7	16147.3	15863.2	15539.9	16274.3	13397.1	16309.7	16120.9	15892.5	1.2174	0.0394186	0.985834	0.504429	0.974418	0.539145	1.20331	0.000590521	12	4	57.6693	Integrin beta-4 OS=Mus musculus GN=Itgb4
Q62468	Vil1	164256	163851	165248	175246	178430	178931	201335	203835	202908	181820	183321	187596	164452	177536	202692	184246	1.07956	0.0141103	0.908991	0.0177052	1.03779	0.0586486	1.23253	0.000498726	68	43	467.916	Villin-1 OS=Mus musculus GN=Vil1
Q9R0N0	Galk1	2833.03	3457.23	3788.69	4399.82	4537.1	4616.38	8508.89	9089.22	9219.85	7195.57	7268.52	7528.89	3359.65	4517.76	8939.32	7330.99	1.34471	0.0797305	0.820084	0.0286285	1.6227	0.00127795	2.66079	0.00386791	4	1	17.8705	Galactokinase OS=Mus musculus GN=Galk1
P27773	Pdia3	337102	329816	330859	306579	312380	306113	355094	352515	338076	339962	336683	335050	332592	308358	348562	337232	0.927134	0.00776627	0.967495	0.223523	1.09364	0.00321738	1.04802	0.0719002	77	57	406.763	Protein disulfide-isomerase A3 OS=Mus musculus GN=Pdia3
Q80YN3	Bcas1	12817	13137.1	12731.7	13129.4	13449.7	13831.7	11067.8	11467.6	11209.8	11692.6	12330.6	12904	12895.2	13470.3	11248.4	12309.1	1.04459	0.127624	1.09429	0.132252	0.913794	0.0825386	0.872292	0.00168796	14	9	77.6762	Breast carcinoma-amplified sequence 1 homolog OS=Mus musculus GN=Bcas1
P35564	Canx	34798	35079.4	34399.4	28497.6	26958.8	28384.9	38562.9	38576.7	38257.4	47669.6	47160	45590.5	34758.9	27947.1	38465.7	46806.7	0.804026	0.00949954	1.21684	0.0204994	1.67483	0.000741137	1.10664	0.00107405	17	7	123.576	Calnexin OS=Mus musculus GN=Canx
Q6IFZ6	Krt77	14197.4	14068	14669.5	17424.7	17577.5	17783.4	17958.7	17840.5	18481.4	18364.6	18672.2	18408.2	14311.6	17595.2	18093.6	18481.7	1.22944	0.00427505	1.02145	0.246298	1.05038	0.0100214	1.26426	6.6616e-05	40	5	220.465	Keratin, type II cytoskeletal 1b OS=Mus musculus GN=Krt77
P19536	Cox5b	45802.5	46223	47493.7	42794.8	44251	43676.1	61816.8	62735.8	64731.6	58719.7	59909.5	59274.6	46506.4	43573.9	63094.7	59301.2	0.936945	0.0297035	0.939876	0.0696235	1.36093	0.000512282	1.35669	8.69269e-05	16	9	92.2526	Cytochrome c oxidase subunit 5B, mitochondrial OS=Mus musculus GN=Cox5b
P62835	Rap1a	3136.01	3627.1	3507.07	4498.62	4211.36	4524.89	5221.89	5290.34	5572.27	3835.35	3443.49	3802.64	3423.39	4411.62	5361.5	3693.83	1.28867	0.0221308	0.688954	0.00759756	0.837295	0.0238689	1.56614	0.00733967	9	2	67.8886	Ras-related protein Rap-1A OS=Mus musculus GN=Rap1a
Q6ZWV3	Rpl10	4908.35	5333.01	5172.08	3201.18	3604.7	3234.6	4745.17	4659.59	4354.17	5237.76	5355.65	5327.73	5137.82	3346.83	4586.31	5307.05	0.651411	0.00492969	1.15715	0.0479121	1.58569	0.00849789	0.892658	0.110736	5	1	37.8342	60S ribosomal protein L10 OS=Mus musculus GN=Rpl10
P21614	Gc	8338.78	8256.71	8678.44	11689.6	11416	12214.5	10388.5	10446.2	10874.6	10201.6	10462	10871.3	8424.64	11773.4	10569.8	10511.7	1.39749	0.00621531	0.994504	0.862534	0.892833	0.0281365	1.25462	0.000393295	10	4	55.6537	Vitamin D-binding protein OS=Mus musculus GN=Gc
Q9DCS2	UPF0585 protein C16orf13 homolog	929.863	844.271	919.605	517.755	610.076	588.084	734.172	638.518	669.015	930.887	951.061	956.506	897.913	571.971	680.568	946.151	0.637001	0.00688298	1.39024	0.0269349	1.65419	0.00986222	0.757944	0.00715591	1	1	5.0477	UPF0585 protein C16orf13 homolog OS=Mus musculus
Q8C2Q3	Rbm14	12810.6	13496.8	12207.3	4977.35	5617.01	5509.59	5318.98	5481.56	5551.49	9475.82	9273.89	9243.72	12838.3	5367.98	5450.68	9331.14	0.418124	0.00406968	1.71192	0.00076382	1.7383	0.00443467	0.424565	0.00163077	9	5	43.8475	RNA-binding protein 14 OS=Mus musculus GN=Rbm14
Q62009	Postn	45975.1	45965.7	44981.5	43715.4	44621.2	44154.4	48783.1	48557.4	47607.8	42823.7	41814.8	43916.9	45640.8	44163.6	48316.1	42851.8	0.967636	0.0513949	0.886905	0.0172426	0.970296	0.185903	1.05862	0.000507831	38	20	237.997	Periostin OS=Mus musculus GN=Postn
B1AY13	Usp24	9403.85	9282.54	8979.21	8334.8	8552	8668.6	7776.12	8433.81	8090.76	7151.89	7315.6	6532.42	9221.87	8518.47	8100.23	6999.97	0.923725	0.0310937	0.864169	0.0563154	0.821741	0.0257786	0.878372	0.0496288	5	1	32.6916	Ubiquitin carboxyl-terminal hydrolase 24 OS=Mus musculus GN=Usp24
P17751	Tpi1	98308.5	99614.8	102619	94961.1	93745.2	94512.5	126729	126598	129311	117388	117856	112401	100181	94406.3	127546	115881	0.942361	0.0668357	0.908546	0.0322224	1.22748	0.0128481	1.27316	0.000753257	26	16	193.89	Triosephosphate isomerase OS=Mus musculus GN=Tpi1
Q8R081	Hnrnpl	10033.9	9571.73	9334.8	7579.75	7838.61	7706	10357.4	10069.8	9121.58	10237.8	10534.7	10111.5	9646.81	7708.12	9849.6	10294.7	0.799033	0.0185765	1.04519	0.432951	1.33556	0.00219303	1.02102	0.465738	13	5	92.4278	Heterogeneous nuclear ribonucleoprotein L OS=Mus musculus GN=Hnrnpl
P20029	Hspa5	270940	265611	258070	265655	266725	265902	319620	325503	319995	307498	307346	302140	264874	266094	321706	305661	1.00461	0.817252	0.950127	0.0177198	1.1487	0.00603447	1.21456	0.00592604	71	38	450.162	78 kDa glucose-regulated protein OS=Mus musculus GN=Hspa5
P62962	Pfn1	153275	151527	153531	163919	165477	166587	162691	165243	167176	156487	156298	148962	152778	165328	165037	153916	1.08215	0.00380518	0.932616	0.0616933	0.930974	0.052577	1.08024	0.0126811	29	24	128.289	Profilin-1 OS=Mus musculus GN=Pfn1
Q9QXV0	Pcsk1n	1499.95	1477.64	1630.67	1237.52	1095.47	1098.43	1185.84	1270.78	1361.2	712.116	768.553	870.037	1536.09	1143.81	1272.61	783.569	0.744624	0.0152506	0.615718	0.0131793	0.685054	0.0136706	0.828475	0.0166092	2	1	10.1321	ProSAAS OS=Mus musculus GN=Pcsk1n
P17710	Hk1	10322.9	9801.94	9911.2	11457.1	11075.7	11057.8	10317.4	10764.7	10208.7	9457.12	8895.39	9059.64	10012	11196.9	10430.3	9137.38	1.11834	0.0169797	0.876042	0.0232364	0.816066	0.00431689	1.04178	0.278751	24	5	122.188	Hexokinase-1 OS=Mus musculus GN=Hk1
Q99KP3	Cryl1	14925.2	15364.7	15512.9	14739.5	14625.9	14588.8	13238.6	13125.2	14410.4	16126	15914.1	16174.1	15267.6	14651.4	13591.4	16071.4	0.959641	0.101745	1.18247	0.0543012	1.09692	0.00295887	0.89021	0.04029	11	9	62.5109	Lambda-crystallin homolog OS=Mus musculus GN=Cryl1
Q9CQX2	Cyb5b	5349.73	5205.15	5219.73	3177.28	3671.31	3741.91	7291.55	7295.18	7678.56	7690.2	7688.14	7828.5	5258.2	3530.17	7421.76	7735.61	0.671364	0.0216579	1.04229	0.182886	2.19129	0.00464791	1.41146	0.00416423	6	3	32.7869	Cytochrome b5 type B OS=Mus musculus GN=Cyb5b
Q99LF4	Rtcb	31336.2	31783	32405.7	38447.3	38782.1	39423.9	39705.9	39976.9	40338.4	34132	34283.8	35459.8	31841.6	38884.4	40007.1	34625.2	1.22118	0.00198798	0.865476	0.0130209	0.890465	0.00711696	1.25644	0.000508377	11	7	77.2141	tRNA-splicing ligase RtcB homolog OS=Mus musculus GN=Rtcb
Q60668	Hnrnpd	21146.5	20796.7	21196.1	22349.3	22427.4	21842.7	22197.6	21398	21909.1	18905.3	17781.2	18451.7	21046.4	22206.5	21834.9	18379.4	1.05512	0.0235103	0.841746	0.0113696	0.827661	0.00647592	1.03746	0.0261372	9	5	74.5112	Heterogeneous nuclear ribonucleoprotein D0 OS=Mus musculus GN=Hnrnpd
Q61545	Ewsr1	14512.3	15131	15603.3	12938.7	12106.9	11980.8	14925.2	15396.2	15261.9	14946.4	14418.9	14147.1	15082.2	12342.2	15194.5	14504.1	0.818325	0.0131032	0.954566	0.129367	1.17517	0.0140329	1.00744	0.661294	10	3	81.0395	RNA-binding protein EWS OS=Mus musculus GN=Ewsr1
Q61147	Cp	1414.76	1472.73	1295.35	1596.06	1630.2	1504.48	2080.56	1992.88	1761.03	2119.29	2027.41	1950.75	1394.28	1576.91	1944.82	2032.48	1.13099	0.0861492	1.04507	0.547444	1.2889	0.00790438	1.39486	0.00655649	12	2	62.7087	Ceruloplasmin OS=Mus musculus GN=Cp
P50247	Ahcy	67174	65455.8	68675.2	74333.6	75839.9	77438.1	74954.3	76771.9	77512.7	72002.3	71087.4	71671	67101.7	75870.5	76413	71586.9	1.13068	0.0107731	0.936843	0.0426107	0.943541	0.0503244	1.13876	0.0131843	31	22	199.366	Adenosylhomocysteinase OS=Mus musculus GN=Ahcy
P24270	Cat	13436.6	13797.9	12971	14640.8	14029.6	13605.8	12477.5	12715.8	12226.6	20765.6	19802.5	19879	13401.8	14092.1	12473.3	20149	1.0515	0.200106	1.61537	0.00577314	1.42981	0.00178451	0.930715	0.00845852	17	10	110.305	Catalase OS=Mus musculus GN=Cat
Q9JKR6	Hyou1	45284.2	45719.5	45827.4	43789.6	41805.2	41694	39173.3	41409.1	38902.6	43031	40714	42809.4	45610.3	42429.6	39828.3	42184.8	0.930263	0.0657733	1.05917	0.149927	0.99423	0.839077	0.873231	0.0194535	24	14	171.957	Hypoxia up-regulated protein 1 OS=Mus musculus GN=Hyou1
Q62000	Ogn	20641.5	20978.3	21357.9	16304	16025.4	16274.6	21553.3	21019.6	20836.5	16317.1	15638.5	15657.2	20992.6	16201.3	21136.5	15870.9	0.771764	0.0043165	0.750878	0.00339339	0.979607	0.319314	1.00685	0.762786	13	8	71.0526	Mimecan OS=Mus musculus GN=Ogn
Q8K0Y2	Krt33a	16.1406	87.523	27.9362	2398.15	2490.81	2184.04	81.2091	82.6863	64.2123	99.8761	106.383	69.6796	43.8666	2357.67	76.0359	91.9796	53.7463	0.00619388	1.20969	0.377355	0.0390129	0.00578793	1.73334	0.240768	11	1	77.0137	Keratin, type I cuticular Ha3-I OS=Mus musculus GN=Krt33a
Q99J99	Mpst	8918.58	8814.72	8393.94	5886.28	5635.16	5390.44	6474.13	6084.84	5579.97	8527.74	7887	7834.95	8709.08	5637.29	6046.31	8083.23	0.647289	0.00258301	1.33689	0.0199158	1.43389	0.00631211	0.694254	0.0048049	11	4	67.653	3-mercaptopyruvate sulfurtransferase OS=Mus musculus GN=Mpst
O55111	Dsg2	16950.4	18350.1	18318.2	16895.3	16990.2	17184	16549.6	16518.8	16200	16062.1	16174.8	16903.8	17872.9	17023.2	16422.8	16380.2	0.952459	0.258825	0.99741	0.918123	0.96223	0.157542	0.918864	0.110222	25	8	140.738	Desmoglein-2 OS=Mus musculus GN=Dsg2
P10922	H1f0	804.395	757.597	882.245	797.507	886.469	748.939	535.293	312.778	608.594	515.558	557.974	677.868	814.746	810.972	485.555	583.8	0.995368	0.96141	1.20234	0.478278	0.719877	0.0396762	0.595959	0.0786838	3	1	19.5927	Histone H1.0 OS=Mus musculus GN=H1f0
Q8CI94	Pygb	28025.6	28366	28282.3	28665.5	29271.6	28935.2	38744.3	38953.9	39675.9	44042	44768.3	44154.3	28224.6	28957.5	39124.7	44321.5	1.02596	0.0600542	1.13283	0.0045547	1.53057	0.00028337	1.38619	0.000371634	32	13	197.49	Glycogen phosphorylase, brain form OS=Mus musculus GN=Pygb
Q9D0F9	Pgm1	18152	17490.1	17168.8	19920.2	19509.5	18810.6	19562.1	20418.3	20552.6	20399.9	20127.3	19864.6	17603.6	19413.4	20177.6	20130.6	1.10281	0.0328977	0.997668	0.924559	1.03694	0.178103	1.14622	0.0498796	25	11	126.263	Phosphoglucomutase-1 OS=Mus musculus GN=Pgm1
P23492	Pnp	9055.04	9564.67	9069.99	6789.6	7453.87	7104.96	8566.7	7639.48	6795.63	7876.92	7369.65	7159.02	9229.9	7116.14	7667.27	7468.53	0.770988	0.00711648	0.974079	0.791258	1.04952	0.332408	0.830699	0.112408	8	2	48.9222	Purine nucleoside phosphorylase OS=Mus musculus GN=Pnp
Q8BWT1	Acaa2	71081.9	71496.1	70845.8	74410.3	74191.3	72987	73448.5	73784.4	71178.6	90696.9	90216.1	91151.2	71141.3	73862.9	72803.8	90688.1	1.03826	0.0326575	1.24565	0.00862033	1.22779	0.000741137	1.02337	0.128739	24	15	205.526	3-ketoacyl-CoA thiolase, mitochondrial OS=Mus musculus GN=Acaa2
P56959	Fus	28767.8	28723	29654.9	30820.2	30961.6	31451.3	38259.6	39511.2	38776.1	31776.6	30848.9	31467.1	29048.6	31077.7	38849	31364.2	1.06985	0.0227071	0.807338	0.00414629	1.00922	0.486594	1.33738	0.00261736	13	7	102.561	RNA-binding protein FUS OS=Mus musculus GN=Fus
P24452	Capg	2197.87	2216.04	2438.43	2578.2	2391.67	2304.96	2651.88	3053.29	3215.72	2255.98	2250.64	2181.41	2284.11	2424.94	2973.63	2229.34	1.06166	0.334513	0.749703	0.0839594	0.919338	0.159275	1.30188	0.0215477	3	1	16.6341	Macrophage-capping protein OS=Mus musculus GN=Capg
P58774	Tpm2	13264.6	12154.6	11836	16753.9	16306.8	15516.5	9881.5	9135.85	8995.6	7381.72	6931.39	7209.97	12418.4	16192.4	9337.65	7174.36	1.30391	0.0117689	0.768326	0.025535	0.44307	0.0031905	0.751922	0.000413308	54	7	337.808	Tropomyosin beta chain OS=Mus musculus GN=Tpm2
Q9JMG2	C1galt1c1	2149.11	2317.18	2179.35	2673.5	2550.66	2415.58	2724.53	2909.7	2732.36	2622.27	2477.2	2573.32	2215.21	2546.58	2788.86	2557.6	1.14958	0.0509915	0.917075	0.0789493	1.00433	0.917684	1.25896	0.000226815	6	1	33.696	C1GALT1-specific chaperone 1 OS=Mus musculus GN=C1galt1c1
P03930	Mtatp8	9398.72	10300.4	10796	9222.76	8974.92	9291.09	13394.6	13029.9	14319.9	10375.7	10415.7	11450.7	10165	9162.92	13581.5	10747.4	0.901417	0.17512	0.791326	0.0234118	1.17292	0.0575126	1.3361	0.0139217	4	2	36.1939	ATP synthase protein 8 OS=Mus musculus GN=Mtatp8
P30999	Ctnnd1	3325.58	3554.44	3855.63	4673.33	4429.12	4368.03	3438.38	3945.97	3588.65	4163.84	4076.83	4106.17	3578.55	4490.16	3657.67	4115.61	1.25474	0.0287741	1.1252	0.14189	0.916585	0.069958	1.02211	0.708876	26	5	147.997	Catenin delta-1 OS=Mus musculus GN=Ctnnd1
Q9CZW5	Tomm70a	1451.68	1262.84	1425.72	2573.09	2670.38	2456.87	1545.78	1785.78	1596.46	1413.63	1279.08	1610.72	1380.08	2566.78	1642.67	1434.48	1.85988	0.00259014	0.873258	0.230709	0.558862	0.00546657	1.19027	0.184519	3	1	14.4944	Mitochondrial import receptor subunit TOM70 OS=Mus musculus GN=Tomm70a
P23116	Eif3a	3489.07	3440.14	3615.91	4420.43	4309.47	4692.73	3389	3710.15	3196.89	2786.18	2597.83	2772.06	3515.04	4474.21	3432.01	2718.69	1.27288	0.0186018	0.792156	0.0616933	0.607637	0.00420576	0.97638	0.699553	29	4	136.451	Eukaryotic translation initiation factor 3 subunit A OS=Mus musculus GN=Eif3a
O55023	Impa1	12137	11938.4	12867.5	13342.5	13806	13656.2	14958.2	15095.7	14955.7	11909.5	11395.2	12075.1	12314.3	13601.5	15003.2	11793.3	1.10453	0.0538242	0.786052	0.0158072	0.867057	0.00941224	1.21836	0.0154942	8	6	53.2167	Inositol monophosphatase 1 OS=Mus musculus GN=Impa1
Q9CZY3	Ube2v1	1196.38	1113.43	1308.97	1200.23	1221.78	1136.96	1470.84	1310.58	1367.24	1544.49	1411.82	1229.31	1206.26	1186.32	1382.89	1395.21	0.983467	0.813982	1.00891	0.933969	1.17608	0.175375	1.14642	0.105706	10	1	57.7349	Ubiquitin-conjugating enzyme E2 variant 1 OS=Mus musculus GN=Ube2v1
Q91W90	Txndc5	50611.2	48590.7	46664	44054.3	44648.3	44430.4	56866.6	58065.8	55699.3	56815.5	57766.2	54338.2	48622	44377.7	56877.2	56306.6	0.912708	0.0981933	0.989968	0.727167	1.26881	0.0146906	1.16978	0.0163392	17	9	100.952	Thioredoxin domain-containing protein 5 OS=Mus musculus GN=Txndc5
Q8R4H2	Arhgef12	527.08	468.273	375.819	448.549	590.765	655.494	489.076	195.21	514.71	345.33	430.295	319.493	457.057	564.936	399.665	365.039	1.23603	0.290639	0.913362	0.813044	0.64616	0.0855177	0.874432	0.606772	3	2	16.2317	Rho guanine nucleotide exchange factor 12 OS=Mus musculus GN=Arhgef12
Q8C0P5	Coro2a	1405.3	1214.68	1277.02	1082.2	1072.75	1085.86	1404.36	1337.05	1010.99	1134.04	1302.97	1234.06	1299	1080.27	1250.8	1223.69	0.831617	0.094898	0.978327	0.885501	1.13276	0.127682	0.962894	0.683876	2	1	8.6032	Coronin-2A OS=Mus musculus GN=Coro2a
Q11011	Npepps	22838.3	22832.3	23982.2	21335.8	21469.9	21838.6	24898.6	24989.7	24772	23353	23404.7	23652.9	23217.6	21548.1	24886.8	23470.2	0.928091	0.0635875	0.943079	0.00639739	1.0892	0.00483639	1.07189	0.0649147	18	5	95.9582	Puromycin-sensitive aminopeptidase OS=Mus musculus GN=Npepps
O88990	Actn3	6332.75	6642.24	6522.87	9764.22	9890.29	9978.59	5796.41	5657.19	6146.31	7213.39	7259.36	7639.52	6499.29	9877.7	5866.64	7370.75	1.51981	0.000962008	1.25638	0.0118471	0.746202	0.00366601	0.902659	0.0757782	36	3	210.953	Alpha-actinin-3 OS=Mus musculus GN=Actn3
Q8VDN2	Atp1a1	258270	257440	258846	241378	240571	242354	277824	275563	273356	266588	265672	265256	258185	241434	275581	265839	0.935121	0.000962008	0.964649	0.0352849	1.10108	0.000373249	1.06738	0.00707155	104	56	610.036	Sodium/potassium-transporting ATPase subunit alpha-1 OS=Mus musculus GN=Atp1a1
O55125	Nipsnap1	7970.09	7665.04	8124.98	7489.66	7185.82	7349.38	9143.32	9284.27	9188.5	8222.51	8427.94	8218.01	7920.04	7341.62	9205.37	8289.48	0.926968	0.0557637	0.900506	0.00928918	1.12911	0.00567624	1.16229	0.0187178	6	3	47.2181	Protein NipSnap homolog 1 OS=Mus musculus GN=Nipsnap1
Q9Z2M7	Pmm2	52577	53227.3	52030.6	49726.2	50655.6	51613.9	59079.5	61159.8	60167.9	56135.2	53979.3	52534.1	52611.6	50665.2	60135.7	54216.2	0.963004	0.0807457	0.901563	0.0394562	1.07009	0.0801107	1.14301	0.00421305	19	14	130.53	Phosphomannomutase 2 OS=Mus musculus GN=Pmm2
Q03517	Scg2	1220.75	1419.24	1344.15	1183.29	1121.99	1304.3	1817.19	1536.78	1278.57	903.964	829.238	1021.5	1328.05	1203.19	1544.18	918.234	0.905986	0.242878	0.594642	0.0826434	0.763165	0.0362072	1.16274	0.396387	5	2	23.985	Secretogranin-2 OS=Mus musculus GN=Scg2
P23953	Ces1c	13389.1	13710.7	13490	13885.7	13347.5	14260.4	16002.5	16130.2	16264.7	15317.7	15243.1	15035.9	13529.9	13831.2	16132.5	15198.9	1.02227	0.43489	0.942129	0.010285	1.09888	0.0433052	1.19235	0.00166047	11	5	89.3453	Carboxylesterase 1C OS=Mus musculus GN=Ces1c
Q9D816	Cyp2c55	90331	89665.4	87326.5	77948.8	76768.8	77429.8	93254.5	91205.1	88798.8	91634.2	92257.7	91443.1	89107.6	77382.5	91086.1	91778.3	0.868416	0.0110863	1.0076	0.705912	1.18603	0.000493308	1.0222	0.0484108	30	24	171.945	Cytochrome P450 2C55 OS=Mus musculus GN=Cyp2c55
Q9WTI7	Myo1c	1841.37	2073.75	2044.91	1614.34	1618.83	1507.81	1325.48	1333.32	1512.03	1548.53	1527.14	1519.48	1986.68	1580.33	1390.28	1531.71	0.795463	0.0360353	1.10173	0.207571	0.969239	0.355173	0.699799	0.014054	6	3	28.0169	Unconventional myosin-Ic OS=Mus musculus GN=Myo1c
P61022	Chp1	4047.43	3997.77	3637.15	2961.84	3006.98	2882.39	1990.41	1902.26	1842.01	3346.95	3271.75	2708.95	3894.11	2950.4	1911.56	3109.21	0.757657	0.03081	1.62654	0.0543054	1.05383	0.556518	0.490884	0.000641051	6	3	36.1619	Calcineurin B homologous protein 1 OS=Mus musculus GN=Chp1
Q9DCM0	Ethe1	74956.5	74223.7	72037.6	62500.1	63258.2	61102.9	63862.4	61473.3	58708.4	86082.7	88222	84593.2	73739.3	62287.1	61348	86299.3	0.844693	0.00560673	1.40672	0.00578601	1.38551	0.00181251	0.831959	0.0049209	17	15	91.7736	Persulfide dioxygenase ETHE1, mitochondrial OS=Mus musculus GN=Ethe1
P16110	Lgals3	30870.7	29846	29641.2	21771.1	20129.3	19493.3	17695.6	16286.8	16009.7	26410.6	25716.9	26043.2	30119.3	20464.5	16664	26056.9	0.67945	0.00619388	1.56366	0.00954242	1.27327	0.0203273	0.553268	0.000957495	15	8	57.6362	Galectin-3 OS=Mus musculus GN=Lgals3
Q9JIX8	Acin1	3540.84	3256.64	3225.63	1826.03	2010.13	2072.17	2160.14	2223.73	1733.79	2595.59	3029.55	2796.58	3341.04	1969.44	2039.22	2807.24	0.589471	0.00510736	1.37662	0.0482031	1.4254	0.0183301	0.610356	0.0186643	2	2	8.9811	Apoptotic chromatin condensation inducer in the nucleus OS=Mus musculus GN=Acin1
P19001	Krt19	744569	739780	758781	704849	713191	719036	754340	765756	769220	792168	785228	796178	747710	712359	763105	791191	0.952721	0.0244768	1.0368	0.0311168	1.11066	0.00180905	1.02059	0.10166	172	84	713.143	Keratin, type I cytoskeletal 19 OS=Mus musculus GN=Krt19
Q8C1B7	Sept11	9621.58	9866.72	9606.24	8207.3	8175.79	8069.48	7661.02	7747.52	7409.45	8490.2	8502.91	8039	9698.18	8150.86	7606	8344.04	0.840452	0.00492969	1.09703	0.0506185	1.0237	0.377064	0.78427	0.00142936	14	5	63.9498	Septin-11 OS=Mus musculus GN=Sept11
Q8QZS1	Hibch	4137.16	4811.07	5136.99	4350.46	4045.41	4286.74	3693.14	4249.74	4008.21	3961.09	4035.58	4537.71	4695.07	4227.54	3983.69	4178.12	0.90042	0.306835	1.04881	0.543386	0.988312	0.841758	0.848484	0.0644363	9	2	45.4809	3-hydroxyisobutyryl-CoA hydrolase, mitochondrial OS=Mus musculus GN=Hibch
Q8QZR3	Ces2a	5217.75	5087.5	5042.35	2788.59	2514.26	2249.71	3238.52	2845.57	2525.05	3578.6	3144.51	3196.05	5115.87	2517.52	2869.71	3306.39	0.4921	0.00828195	1.15217	0.228738	1.31335	0.0337367	0.560943	0.0111057	9	3	63.2776	Pyrethroid hydrolase Ces2a OS=Mus musculus GN=Ces2a
P13020	Gsn	40222.8	40714	41680.1	40750.7	38612.9	39745.6	45709	45406.7	46014.1	37678.6	38900.2	38782.2	40872.3	39703.1	45709.9	38453.7	0.971394	0.258598	0.841254	0.00816228	0.968531	0.211336	1.11836	0.00568195	24	8	162.351	Gelsolin OS=Mus musculus GN=Gsn
P97315	Csrp1	52050.2	52796.7	53769.8	67620.1	67943.4	68148.6	67965.7	69874.1	68068.1	53214	52605	53496.8	52872.2	67904	68636	53105.3	1.2843	0.00436587	0.773723	0.00585745	0.782063	0.00047125	1.29815	0.00253398	10	6	66.526	Cysteine and glycine-rich protein 1 OS=Mus musculus GN=Csrp1
P02468	Lamc1	26064.2	25207	25132.5	26211.4	26313.4	26845	30206.1	29409.9	29362.6	25408.7	26629.1	26064.5	25467.9	26456.6	29659.5	26034.1	1.03882	0.0953038	0.877764	0.0115074	0.984029	0.412923	1.16458	0.000268473	45	14	271.652	Laminin subunit gamma-1 OS=Mus musculus GN=Lamc1
P08003	Pdia4	61996.1	62875.2	63080	64823.6	64089.9	64061.2	65505.5	66244.6	65030.8	67558.9	67169.8	64465.8	62650.4	64324.9	65593.6	66398.2	1.02673	0.0388189	1.01227	0.5786	1.03223	0.195332	1.04698	0.0274653	33	22	287.082	Protein disulfide-isomerase A4 OS=Mus musculus GN=Pdia4
Q8VCM7	Fgg	569.445	657.216	614.415	724.677	592.545	645.719	786.021	703.978	502.44	1090.52	887.236	808.558	613.692	654.314	664.146	928.77	1.06619	0.494283	1.39844	0.143205	1.41946	0.0886597	1.08221	0.716115	2	1	9.0646	Fibrinogen gamma chain OS=Mus musculus GN=Fgg
Q6DFV7	Ncoa7	911.606	966.421	971.57	1223.71	1277.36	1136.84	441.077	450.303	288.172	680.384	647.367	614.706	949.866	1212.64	393.184	647.486	1.27664	0.0289355	1.64678	0.0625735	0.533949	0.00603447	0.413937	0.0290823	5	1	22.6243	Nuclear receptor coactivator 7 OS=Mus musculus GN=Ncoa7
P80314	Cct2	26524.2	24449.6	25382.2	26741.8	28346.7	27710.8	26690.7	27337.4	26174	24779.4	24414	24981.1	25452	27599.8	26734	24724.8	1.08439	0.0837462	0.924845	0.0388115	0.895835	0.0297968	1.05037	0.260063	14	7	108.608	T-complex protein 1 subunit beta OS=Mus musculus GN=Cct2
Q922U2	Krt5	2833.69	3041.69	3298.81	3384.19	3211.62	3431.05	2872.34	3478.08	3367.84	2880.15	3690.21	3450.25	3058.06	3342.29	3239.42	3340.2	1.09294	0.207684	1.03111	0.80094	0.999377	0.994004	1.0593	0.28717	54	3	221.784	Keratin, type II cytoskeletal 5 OS=Mus musculus GN=Krt5
Q9CWZ3	Rbm8a	3027.54	3104.14	3029.59	3928.87	3995.96	4229.84	4954.06	5253.5	5168.23	4887.04	5064.76	5629.04	3053.76	4051.56	5125.26	5193.61	1.32674	0.0177524	1.01334	0.834491	1.28188	0.0391018	1.67835	0.000607742	5	3	49.3086	RNA-binding protein 8A OS=Mus musculus GN=Rbm8a
P37804	Tagln	214286	214807	213149	223813	217412	222729	254746	256527	253164	196171	195348	197694	214081	221318	254812	196404	1.03381	0.0953321	0.77078	0.00076382	0.887429	0.00939425	1.19026	9.34729e-05	42	29	225.077	Transgelin OS=Mus musculus GN=Tagln
P21278	Gna11	9804.49	9257.99	9419.73	10264.8	9525.17	9417.8	8792.76	8428.82	8206.92	8852.36	9075.21	8690.67	9494.07	9735.91	8476.17	8872.75	1.02547	0.548148	1.04679	0.198817	0.911343	0.0916909	0.892785	0.0126847	17	6	112.983	Guanine nucleotide-binding protein subunit alpha-11 OS=Mus musculus GN=Gna11
P14131	Rps16	3442.67	4026.74	3518.24	2655.47	2743.16	2640.25	915.036	793.976	1208.58	2227.79	2300.67	1952.85	3662.55	2679.63	972.532	2160.44	0.731629	0.0561539	2.22146	0.0130209	0.806245	0.0479752	0.265534	0.0140487	5	3	28.3623	40S ribosomal protein S16 OS=Mus musculus GN=Rps16
P62320	Snrpd3	1898.17	1948.49	1936.41	1624.38	1628.45	1685.86	1533.84	1394.05	1722.84	1539.79	1594.1	1721.7	1927.69	1646.23	1550.24	1618.53	0.853991	0.00469363	1.04405	0.643572	0.983174	0.703917	0.804196	0.0723166	3	1	17.2145	Small nuclear ribonucleoprotein Sm D3 OS=Mus musculus GN=Snrpd3
Q8R059	Gale	8316.74	8158.04	7839.22	6452.32	6325.62	6208.96	5766.91	5294.48	4732.86	8894.58	8189.77	7358.68	8104.67	6328.96	5264.75	8147.68	0.780904	0.00840567	1.54759	0.0286285	1.28736	0.0740652	0.649595	0.00836885	6	4	55.9779	UDP-glucose 4-epimerase OS=Mus musculus GN=Gale
P70670	Naca	27303.7	27111	27622.2	33776.1	34082.3	33952.9	31208.2	30441.2	30924.8	26693.3	26161.1	27756.4	27345.7	33937.1	30858.1	26870.3	1.24104	0.000962008	0.870769	0.0225652	0.791768	0.0100214	1.12845	0.00286018	28	6	200.482	Nascent polypeptide-associated complex subunit alpha, muscle-specific form OS=Mus musculus GN=Naca
Q8BMS1	Hadha	82933.5	82635	84910.6	112247	105550	102640	95245.6	93990.7	94416.8	106375	104260	104751	83493.1	106812	94551	105129	1.2793	0.0274221	1.11187	0.00690108	0.984237	0.657646	1.13244	0.00586557	38	22	280.744	Trifunctional enzyme subunit alpha, mitochondrial OS=Mus musculus GN=Hadha
P62908	Rps3	45196.2	43421.4	45845.4	54468.8	55598.7	57778.5	43448.9	44803.8	44197.9	46531.6	45565.1	46175.5	44821	55948.7	44150.2	46090.7	1.24827	0.00690299	1.04395	0.0479121	0.823804	0.0146906	0.985035	0.585651	16	8	124.883	40S ribosomal protein S3 OS=Mus musculus GN=Rps3
Q91WQ3	Yars	15538.3	14986.6	14517.5	15528.2	16049.4	16164.7	11954	11657.4	11283	10052.3	9744.23	10509.1	15014.1	15914.1	11631.4	10101.9	1.05994	0.112328	0.868497	0.0261466	0.634773	0.000923599	0.774699	0.000192798	6	4	33.5091	Tyrosine--tRNA ligase, cytoplasmic OS=Mus musculus GN=Yars
O55143	Atp2a2	19399.1	19231.9	18789	22012.2	21600.8	20276.1	23601.3	22934.5	23993.3	21100.7	20584.3	19967.4	19140	21296.4	23509.7	20550.8	1.11266	0.0725817	0.874142	0.0158156	0.964992	0.350093	1.2283	0.00962705	36	11	229.194	Sarcoplasmic/endoplasmic reticulum calcium ATPase 2 OS=Mus musculus GN=Atp2a2
P62737	Acta2	433190	434208	432596	368019	375941	377826	350807	341478	332678	329397	324709	327596	433331	373929	341654	327234	0.862916	0.00972333	0.957794	0.157823	0.875125	0.00506646	0.788436	0.00393297	136	29	512.436	Actin, aortic smooth muscle OS=Mus musculus GN=Acta2
Q9CQA3	Sdhb	40607.2	38785.8	39878.7	44397.9	45174.9	45202.2	47572.4	47603.7	49219.7	36854.6	36746.6	37745.6	39757.2	44925	48131.9	37115.6	1.12998	0.0134966	0.771122	0.00559771	0.826168	0.00106011	1.21065	0.00738944	17	10	135.155	Succinate dehydrogenase [ubiquinone] iron-sulfur subunit, mitochondrial OS=Mus musculus GN=Sdhb
O35099	Map3k5	6794.32	6549.11	6380.28	6288.53	6263.79	5736.3	5034.24	4666.47	4807.95	4988.28	4478.14	5100.29	6574.57	6096.21	4836.22	4855.57	0.92724	0.145022	1.004	0.950602	0.79649	0.0196957	0.735595	0.00289981	11	3	43.7349	Mitogen-activated protein kinase kinase kinase 5 OS=Mus musculus GN=Map3k5
Q60749	Khdrbs1	595.213	711.93	703.781	668.313	618.907	669.439	798.035	848.569	888.037	651.364	726.951	662.591	670.308	652.22	844.881	680.302	0.973015	0.745281	0.805205	0.0318426	1.04306	0.432514	1.26044	0.0204692	4	2	23.8146	KH domain-containing, RNA-binding, signal transduction-associated protein 1 OS=Mus musculus GN=Khdrbs1
O09131	Gsto1	39218.9	37930.4	39316.1	41105.5	43139.2	43833	49488.1	49915.8	49315.2	47435.2	47863.2	48652.5	38821.8	42692.6	49573	47983.6	1.09971	0.0470196	0.967938	0.0633228	1.12393	0.0239138	1.27694	0.00378918	19	12	145.414	Glutathione S-transferase omega-1 OS=Mus musculus GN=Gsto1
P19324	Serpinh1	30162.2	29973.3	30592	24824.6	23859.3	24080.9	26661.4	28124.5	27443.4	29934.9	28802.7	28965.2	30242.5	24255	27409.8	29234.3	0.802016	0.0030483	1.06656	0.0658925	1.20529	0.00306987	0.906333	0.0316289	6	3	31.0077	Serpin H1 OS=Mus musculus GN=Serpinh1
P27546	Map4	13698.3	13662.4	13539.4	14240.5	14147.2	13959.1	14545.6	14278.2	13191.6	12558.3	12542.8	12932.7	13633.4	14115.6	14005.2	12677.9	1.03537	0.0304179	0.905234	0.123415	0.898153	0.00583877	1.02727	0.428563	22	8	117.836	Microtubule-associated protein 4 OS=Mus musculus GN=Map4
P14211	Calr	147596	144990	148861	159694	163056	167340	199900	202479	205733	180697	177485	182714	147149	163363	202704	180299	1.11019	0.0218977	0.889467	0.00771777	1.10367	0.0124174	1.37754	0.000787649	32	19	230.167	Calreticulin OS=Mus musculus GN=Calr
Q8BG05	Hnrnpa3	28425.4	28581.7	29169.8	29229.3	28105.6	27755.3	37115.6	36345.5	35669.1	32421.3	31968.7	32239.9	28725.6	28363.4	36376.7	32210	0.987389	0.579597	0.885455	0.0239394	1.13562	0.018655	1.26635	0.00645308	24	7	133.674	Heterogeneous nuclear ribonucleoprotein A3 OS=Mus musculus GN=Hnrnpa3
Q99KN9	Clint1	6229.83	6517.43	6236.42	6132.04	6014.7	6000.82	7984.18	7978.31	8037.46	7140.74	7278.34	7325.03	6327.89	6049.18	7999.98	7248.03	0.955956	0.122798	0.906006	0.0150988	1.19818	0.00153346	1.26424	0.0047899	13	6	74.2404	Clathrin interactor 1 OS=Mus musculus GN=Clint1
Q9WUK2	Eif4h	4620.68	4637.51	4439.08	7535.2	7816.93	7576.68	6267.39	6290.12	6238.86	4716.57	4759.75	4976.48	4565.76	7642.94	6265.46	4817.6	1.67397	0.000962008	0.768914	0.0144953	0.630333	0.000657205	1.37227	0.00139664	5	3	27.3754	Eukaryotic translation initiation factor 4H OS=Mus musculus GN=Eif4h
Q3U0V1	Khsrp	18564.1	19562.6	19337.8	18858.6	18528.7	19326.7	18876.8	19928.2	19596.5	17760.8	16483.9	17209.3	19154.8	18904.7	19467.2	17151.3	0.986941	0.607779	0.881039	0.0312004	0.907254	0.0373868	1.01631	0.00887771	17	6	109.48	Far upstream element-binding protein 2 OS=Mus musculus GN=Khsrp
Q80T79	Csmd3	9370.78	8821.22	8640.66	9284.21	9142.36	9390.99	7201.94	7031.55	6962.69	5207.49	5315.25	5048.93	8944.22	9272.52	7065.39	5190.56	1.0367	0.329445	0.734645	0.0033545	0.559778	0.00028337	0.78994	0.00368172	7	1	26.6248	CUB and sushi domain-containing protein 3 OS=Mus musculus GN=Csmd3
Q9R207	Nbn	133.803	134.111	215.336	459.16	460.289	401.206	128.916	259.731	171.11	124.608	260.92	180.84	161.083	440.218	186.586	188.79	2.73287	0.00870638	1.01181	0.97464	0.428854	0.0229587	1.15832	0.675505	2	1	12.0599	Nibrin OS=Mus musculus GN=Nbn
Q9DBR7	Ppp1r12a	993.204	871.832	1067.54	838.765	672.803	754.725	1912.93	1939.47	2337	2366.08	2331.52	2312.39	977.527	755.431	2063.13	2336.67	0.772798	0.0725817	1.13258	0.252162	3.09316	0.00250236	2.11057	0.00371368	19	3	88.2799	Protein phosphatase 1 regulatory subunit 12A OS=Mus musculus GN=Ppp1r12a
Q9WTP6	Ak2	24994.2	23541.2	22478.9	24778.2	24101.6	24195.9	22784.7	21832.8	21882.5	21543	21677	20931.8	23671.5	24358.6	22166.7	21383.9	1.02903	0.508346	0.964688	0.177994	0.877879	0.00384084	0.93643	0.0807114	14	8	90.1764	Adenylate kinase 2, mitochondrial OS=Mus musculus GN=Ak2
P62751	Rpl23a	15003.1	15637.6	15667.4	18535.5	17529.2	18451	16977	17622.4	17741.4	13702	14010.6	14095.6	15436.1	18171.9	17447	13936.1	1.17724	0.0135786	0.79877	0.00944251	0.766903	0.00834209	1.13027	0.000150998	10	6	56.4903	60S ribosomal protein L23a OS=Mus musculus GN=Rpl23a
O54724	Ptrf	27491	28236.5	27839.1	27607.9	26691.2	27894.2	28855.9	29452.7	29447.5	23748	24445.5	23117.1	27855.5	27397.8	29252	23770.2	0.983566	0.409547	0.812599	0.00954242	0.867596	0.00818032	1.05013	0.00677479	16	11	86.7375	Polymerase I and transcript release factor OS=Mus musculus GN=Ptrf
Q91Y97	Aldob	21322.7	20829.4	21738.2	23271.6	23958.8	24605.1	21645.2	22376.1	22543.6	22101.4	22886	22905.3	21296.8	23945.2	22188.3	22630.9	1.12436	0.0208008	1.01995	0.388811	0.945114	0.078129	1.04186	0.13094	24	10	169.886	Fructose-bisphosphate aldolase B OS=Mus musculus GN=Aldob
Q8BSY0	Asph	4716.35	4969.84	5143.28	4601.45	4741.47	4661.84	4791.71	4946.97	4669.58	5243.02	5227.52	5460.88	4943.15	4668.25	4802.75	5310.47	0.944388	0.196212	1.10571	0.0327556	1.13757	0.011902	0.971597	0.497103	7	3	36.9802	Aspartyl/asparaginyl beta-hydroxylase OS=Mus musculus GN=Asph
Q9CZU6	Cs	54857.6	53955.4	55353.9	48575.3	51521.2	50725.4	47052.3	47762.9	47227.8	54707.1	55018.9	57221.7	54722.3	50274	47347.7	55649.2	0.918711	0.0443517	1.17533	0.0241278	1.10692	0.0219834	0.865236	0.00626268	21	14	135.389	Citrate synthase, mitochondrial OS=Mus musculus GN=Cs
Q9JMH6	Txnrd1	12383.2	12035.2	12704.5	12209	12810.9	13259	11675.5	11387.1	12521.5	12552.9	11491.3	11790.8	12374.3	12759.6	11861.4	11945	1.03114	0.413211	1.00705	0.898174	0.936153	0.171033	0.958548	0.0946814	9	4	61.4553	Thioredoxin reductase 1, cytoplasmic OS=Mus musculus GN=Txnrd1
Q02788	Col6a2	29624.1	28638.5	29274.3	35808	36322.3	36675.9	35585	36043.1	36887.4	35688.6	34731.8	35257.4	29179	36268.7	36171.8	35225.9	1.24298	0.00166618	0.97385	0.182886	0.971248	0.0721122	1.23965	0.00532962	31	14	202.859	Collagen alpha-2(VI) chain OS=Mus musculus GN=Col6a2
P13595	Ncam1	3002.24	2989.67	3153.79	4538.23	4496.81	4721.51	4417.7	3985.41	4167.29	3670.84	3191.46	3188.33	3048.57	4585.52	4190.13	3350.21	1.50416	0.00216066	0.799547	0.043582	0.730607	0.0179192	1.37446	0.0115988	14	4	73.6945	Neural cell adhesion molecule 1 OS=Mus musculus GN=Ncam1
P00405	Mtco2	19845.2	20812.4	19789.2	20511.8	20429.5	19449.3	17145.9	16591.5	15661.1	23826	23490.4	23127	20149	20130.2	16466.2	23481.2	0.99907	0.9789	1.42603	0.00907325	1.16646	0.00849789	0.817222	0.0187763	10	6	50.0361	Cytochrome c oxidase subunit 2 OS=Mus musculus GN=Mtco2
Q62093	Srsf2	6544.4	6352.77	6909.39	6883.69	7067.61	7496.13	6675.72	7161.6	7398.41	6197.5	6471.22	6476.92	6602.19	7149.14	7078.58	6381.88	1.08284	0.130946	0.901577	0.110771	0.892677	0.0512336	1.07216	0.138165	3	2	16.205	Serine/arginine-rich splicing factor 2 OS=Mus musculus GN=Srsf2
Q9DBM2	Ehhadh	2520.58	2511.78	2623.1	5130.58	4827.81	4822.33	3068.34	3129.85	3337.03	4729.29	4735.02	4902.34	2551.82	4926.91	3178.41	4788.89	1.93074	0.00530988	1.50669	0.0045547	0.971987	0.362901	1.24555	0.00335836	10	4	40.5764	Peroxisomal bifunctional enzyme OS=Mus musculus GN=Ehhadh
P21447	Abcb1a	11354.4	11279.9	11922.9	11674.9	12538.4	12502	13420.7	13973	14319.9	11931.5	11851.5	12600	11519.1	12238.5	13904.5	12127.7	1.06245	0.159961	0.872212	0.0269349	0.99095	0.802925	1.20709	0.00531113	34	5	185.864	Multidrug resistance protein 1A OS=Mus musculus GN=Abcb1a
Q9Z2W0	Dnpep	2711.42	2850.3	2743.24	3314.31	3006.12	2975.71	1885.29	2077.44	2153.65	2387.08	2215.49	2205.45	2768.32	3098.71	2038.79	2269.34	1.11935	0.117745	1.11308	0.138662	0.732349	0.0146906	0.736472	0.0129764	4	1	20.5416	Aspartyl aminopeptidase OS=Mus musculus GN=Dnpep
P21981	Tgm2	42545.7	44102.3	43912.2	42551.7	40994.4	40364.5	49750.9	49245	49564	40129.2	39493.9	39097.9	43520.1	41303.5	49520	39573.7	0.949068	0.0925999	0.799145	0.00369945	0.958119	0.129201	1.13787	0.0114302	25	15	186.393	Protein-glutamine gamma-glutamyltransferase 2 OS=Mus musculus GN=Tgm2
Q91VW5	Golga4	28434.6	26941.4	28480.3	30990.7	30096	31667.9	42216	42638.8	41092.9	34089.8	33923.9	37899.1	27952.1	30918.2	41982.6	35304.3	1.10612	0.0298008	0.840927	0.0576899	1.14186	0.0886597	1.50195	0.0044822	38	5	187.887	Golgin subfamily A member 4 OS=Mus musculus GN=Golga4
O08810	Eftud2	1776.21	2056.67	1935.99	1918.04	1782.48	1818.53	2642.38	2601.33	2739.83	2843.43	2928.9	3039.31	1922.96	1839.68	2661.18	2937.21	0.956694	0.489775	1.10373	0.049676	1.59659	0.00188345	1.3839	0.0209252	21	3	106.891	116 kDa U5 small nuclear ribonucleoprotein component OS=Mus musculus GN=Eftud2
E5FYH1	Topaz1	727.395	855.178	880.756	947.01	1031.39	1112.94	684.813	568.139	529.007	433.835	612.116	737.387	821.11	1030.45	593.986	594.446	1.25494	0.0651745	1.00077	0.996609	0.576882	0.0360439	0.723395	0.138747	9	1	31.7258	Testis- and ovary-specific PAZ domain-containing protein 1 OS=Mus musculus GN=Topaz1
Q6ZWX6	Eif2s1	1591.71	1541.08	1702.99	1513.13	1527.2	1765.27	1182.29	1187.14	1103.37	1167.13	1221.7	1206.76	1611.93	1601.87	1157.6	1198.53	0.99376	0.942302	1.03536	0.355679	0.748208	0.052577	0.718146	0.0244401	9	3	51.1954	Eukaryotic translation initiation factor 2 subunit 1 OS=Mus musculus GN=Eif2s1
Q6P5E4	Uggt1	20538	21234.4	21219.5	23349.4	23185.3	23587.3	20933.2	21965.5	21302.4	20436.9	19914.3	19882.2	20997.3	23374	21400.4	20077.8	1.11319	0.0115062	0.9382	0.0621991	0.858981	0.00232525	1.0192	0.159883	24	10	128.807	UDP-glucose:glycoprotein glucosyltransferase 1 OS=Mus musculus GN=Uggt1
Q61207	Psap	32612.7	32089.9	33172.6	42481.1	38789.2	40202.6	35283.1	35939.3	37399.6	36563.5	34921.8	35812.1	32625.1	40490.9	36207.3	35765.8	1.2411	0.0304179	0.987806	0.671387	0.883303	0.0503244	1.1098	0.0147789	12	5	88.258	Sulfated glycoprotein 1 OS=Mus musculus GN=Psap
Q3URD3	Slmap	4550.33	4012.92	4484.62	4541.24	4740.88	4681.66	2851.02	2658.54	2531.43	2719.45	2376.96	2539.19	4349.29	4654.59	2680.33	2545.2	1.0702	0.261049	0.949586	0.451593	0.546815	0.00204479	0.616268	0.00928151	19	3	98.655	Sarcolemmal membrane-associated protein OS=Mus musculus GN=Slmap
P55050	Fabp2	30391.9	30353	28936.9	42698.4	39664.7	37714.3	43819.5	43862.9	39322.4	51676.7	50983.4	51785.3	29894	40025.8	42334.9	51481.8	1.33893	0.0307416	1.21606	0.0550322	1.28622	0.0257786	1.41617	0.0033507	13	4	93.6704	Fatty acid-binding protein, intestinal OS=Mus musculus GN=Fabp2
P13808	Slc4a2	3872.28	3620.29	3847.23	2529.99	2486.74	2741.68	2545.92	2497.75	2699.14	4302.77	4583.81	4603.27	3779.93	2586.14	2580.93	4496.62	0.684176	0.00439058	1.74224	0.00551699	1.73874	0.00178383	0.682799	0.00259064	2	1	9.8493	Anion exchange protein 2 OS=Mus musculus GN=Slc4a2
P00329	Adh1	10699.9	11115.1	11099	9051.29	9233.23	8951.38	11732.1	11063.7	11115.7	13720.8	13391.9	13327.6	10971.3	9078.63	11303.8	13480.1	0.82749	0.00587957	1.19252	0.014787	1.48481	0.000697316	1.03031	0.442991	14	10	75.5884	Alcohol dehydrogenase 1 OS=Mus musculus GN=Adh1
Q9JIW9	Ralb	3298.03	3237.36	3103.19	3241.98	3289.56	3330.19	3414.21	3566.37	3207.26	3225.49	3249.19	2943.79	3212.86	3287.24	3395.95	3139.49	1.02315	0.388681	0.924481	0.212727	0.955052	0.31234	1.05699	0.120813	5	2	20.741	Ras-related protein Ral-B OS=Mus musculus GN=Ralb
Q91YT0	Ndufv1	25608.7	25525.6	25326.6	21001.7	21128.7	20547.6	25109.2	24551	22889.2	25426.6	24971.3	24601.3	25487	20892.7	24183.1	24999.7	0.81974	0.00329952	1.03377	0.424762	1.19658	0.00226528	0.948843	0.162657	14	6	79.7362	NADH dehydrogenase [ubiquinone] flavoprotein 1, mitochondrial OS=Mus musculus GN=Ndufv1
P57759	Erp29	4125.01	4065.21	3896.12	3615.54	3709.64	3705.41	3701.5	3899.93	3579.16	3222.39	3513.31	3253.05	4028.78	3676.87	3726.86	3329.58	0.91265	0.0440265	0.893401	0.0765041	0.90555	0.0744187	0.925061	0.0572731	8	2	66.7027	Endoplasmic reticulum resident protein 29 OS=Mus musculus GN=Erp29
Q9JK53	Prelp	16767.8	17381.9	17431.4	13774.5	14306.5	13996	18769.2	18384.3	18199.6	17237.2	17742.9	17566.4	17193.7	14025.7	18451.1	17515.5	0.815745	0.00444005	0.949296	0.0400885	1.24882	0.00134043	1.07313	0.0806521	13	7	97.7667	Prolargin OS=Mus musculus GN=Prelp
P62242	Rps8	8304.39	7943.42	8377.6	9543.97	9360.37	10234.9	10154.5	9376.76	10075.6	6864.36	7401.2	8073.71	8208.47	9713.08	9868.97	7446.43	1.1833	0.0345254	0.75453	0.0254342	0.766639	0.017986	1.20229	0.00305229	8	4	50.8975	40S ribosomal protein S8 OS=Mus musculus GN=Rps8
Q8R146	Apeh	3769.82	3935.26	3935.22	4156.36	3895.42	4193.51	4604.12	5031.64	5106.29	4020.92	4462.81	4288.61	3880.1	4081.76	4914.02	4257.45	1.05197	0.204323	0.866388	0.0690622	1.04304	0.380981	1.26647	0.00595082	6	3	29.2186	Acylamino-acid-releasing enzyme OS=Mus musculus GN=Apeh
P47911	Rpl6	5654.7	6287.99	6428.64	4371.18	4331.18	4520.62	2646.92	2393.12	2398.71	2632.86	2431.32	2472.29	6123.78	4407.66	2479.58	2512.16	0.719762	0.0331266	1.01314	0.81058	0.569953	0.000698579	0.404911	0.00637656	3	3	16.9983	60S ribosomal protein L6 OS=Mus musculus GN=Rpl6
Q9R0P3	Esd	5681.59	6090.13	5554.47	4109.49	4124.17	4235.33	5358.71	5683.89	5380.31	6139.12	6121.44	6447.71	5775.4	4156.33	5474.3	6236.09	0.719662	0.0211712	1.13916	0.0261466	1.50038	0.00447675	0.947866	0.0407273	10	2	68.296	S-formylglutathione hydrolase OS=Mus musculus GN=Esd
Q9QZD8	Slc25a10	3289.75	3410.44	3406.8	3904.27	3705.88	3713.05	4793.12	4742.72	4613.44	4937.39	5017.17	4753.49	3369	3774.4	4716.42	4902.68	1.12033	0.0257906	1.03949	0.191608	1.29893	0.00299607	1.39995	0.00401526	7	3	40.3905	Mitochondrial dicarboxylate carrier OS=Mus musculus GN=Slc25a10
Q8CGC7	Eprs	57745.3	57282.6	56044.6	56999	56882.1	56688.5	49572.2	47997.8	46937.9	40964.7	39983	42771	57024.1	56856.6	48169.3	41239.6	0.997061	0.817092	0.856138	0.0177052	0.725326	0.008327	0.844718	0.0023241	41	14	238.629	Bifunctional glutamate/proline--tRNA ligase OS=Mus musculus GN=Eprs
O55026	Entpd2	2984.57	2975.73	3012.93	3202	3146.61	3026.35	3729.76	3499.87	3684.56	3652.34	2899.27	3259	2991.08	3124.99	3638.06	3270.2	1.04477	0.163316	0.898885	0.299976	1.04647	0.619588	1.21631	0.00814322	6	2	32.924	Ectonucleoside triphosphate diphosphohydrolase 2 OS=Mus musculus GN=Entpd2
P42932	Cct8	29190.2	28560.9	29480.6	31301.3	31613.6	31560.3	31815.8	31494.3	33066	31153.8	31188.9	30079	29077.3	31491.8	32125.4	30807.2	1.08304	0.0208008	0.958969	0.153393	0.978263	0.233198	1.10483	0.00690631	28	11	203.227	T-complex protein 1 subunit theta OS=Mus musculus GN=Cct8
Q99L47	St13	13460.3	13884.2	13776.4	14282.7	13832.6	13696.6	12195.4	12376.2	11747.6	11482.5	11457.2	11040.3	13707	13937.3	12106.4	11326.7	1.01681	0.41371	0.935595	0.0679805	0.812687	0.0029426	0.88323	0.0205721	15	6	92.2308	Hsc70-interacting protein OS=Mus musculus GN=St13
P08249	Mdh2	73805.3	75266.3	75538.7	89658.5	85628.5	87505.1	79694.9	79793	80152.3	65903.4	67114.8	69213.2	74870.1	87597.4	79880.1	67410.5	1.16999	0.0115062	0.843896	0.0223906	0.769549	0.00212141	1.06692	0.00841182	19	14	137.337	Malate dehydrogenase, mitochondrial OS=Mus musculus GN=Mdh2
P63005	Pafah1b1	8184	7960.02	8289.62	10811.9	10432.3	10571	8850.11	9199.97	9063.58	7994.19	7346.36	7887.65	8144.55	10605	9037.89	7742.73	1.3021	0.00198798	0.856697	0.0339139	0.730099	0.00456497	1.10969	0.0369527	15	5	98.7194	Platelet-activating factor acetylhydrolase IB subunit alpha OS=Mus musculus GN=Pafah1b1
P46061	Rangap1	3751.17	3367.23	3503.02	4149.88	4061.93	4301.13	3793.76	3614.51	4440.65	2953.73	2683.48	2984.94	3540.48	4170.98	3949.64	2874.05	1.17808	0.0316831	0.727675	0.0738813	0.689059	0.00358921	1.11557	0.255975	7	1	36.1029	Ran GTPase-activating protein 1 OS=Mus musculus GN=Rangap1
Q8C9B9	Dido1	480.569	495.073	477.515	1043.05	974.224	856.03	0	0	0	87.5111	84.2586	18.9735	484.386	957.767	0	63.5811	1.97728	0.0298522	Inf	0.160698	0.0663847	0.00528268	0	2.61909e-06	3	1	5.9363	Death-inducer obliterator 1 OS=Mus musculus GN=Dido1
Q64331	Myo6	13694.9	14087.4	14389.4	11293.8	11516.4	11593.1	16917	16840.5	17638.9	17447	17472.8	17334.3	14057.2	11467.8	17132.1	17418.1	0.815791	0.00934692	1.01669	0.453371	1.51887	0.000581156	1.21874	0.00249562	23	6	148.651	Unconventional myosin-VI OS=Mus musculus GN=Myo6
P70441	Slc9a3r1	29194	29550.2	30370	23127.4	25223.8	25228.4	36722.8	37104.2	37629.9	49401.4	48588.6	50204.9	29704.8	24526.5	37152.3	49398.3	0.825678	0.0221144	1.32962	0.00414629	2.01408	0.000726323	1.25072	0.000451924	14	7	100.712	Na(+)/H(+) exchange regulatory cofactor NHE-RF1 OS=Mus musculus GN=Slc9a3r1
Q62159	Rhoc	37905.1	35231.5	36669.1	31832.3	33582.9	34732.5	54696	55190.7	55564	50446.9	49721.5	51557.4	36601.9	33382.6	55150.2	50575.3	0.912045	0.0804136	0.917045	0.0225652	1.51502	0.00204479	1.50676	0.00336249	8	1	53.4907	Rho-related GTP-binding protein RhoC OS=Mus musculus GN=Rhoc
Q9CY58	Serbp1	6264.73	5947.01	5474.23	6103.17	6097.91	6534.15	7972.8	8091.85	7800.66	9050.5	9601.95	9098.34	5895.32	6245.08	7955.1	9250.26	1.05933	0.336714	1.16281	0.0278983	1.48121	0.00221325	1.34939	0.0116739	12	5	78.0476	Plasminogen activator inhibitor 1 RNA-binding protein OS=Mus musculus GN=Serbp1
O88569	Hnrnpa2b1	125618	124642	127776	124940	128669	128672	154307	155903	156340	128761	129761	128198	126012	127427	155516	128907	1.01123	0.477645	0.828896	0.00146147	1.01161	0.403021	1.23414	0.00103807	31	22	133.902	Heterogeneous nuclear ribonucleoproteins A2/B1 OS=Mus musculus GN=Hnrnpa2b1
Q99KC8	Vwa5a	6632.99	6310.73	6425	4136.63	3902.05	3845.64	7097.67	7183.99	7021.28	6352.89	6245.2	5768.76	6456.24	3961.44	7100.98	6122.29	0.613583	0.00136864	0.862175	0.0580952	1.54547	0.00713403	1.09986	0.0344432	11	4	56.2596	von Willebrand factor A domain-containing protein 5A OS=Mus musculus GN=Vwa5a
O54734	Ddost	18512.3	17215.5	18611	18386.1	19290.9	19979.7	21144.7	21573.3	21780.7	17584.6	17142.2	17983.5	18112.9	19218.9	21499.6	17570.1	1.06106	0.211821	0.81723	0.00578601	0.91421	0.0722415	1.18697	0.0250633	6	2	51.1834	Dolichyl-diphosphooligosaccharide--protein glycosyltransferase 48 kDa subunit OS=Mus musculus GN=Ddost
Q01768	Nme2	8640.95	8577.92	8968.12	6711.14	6716.36	6967.68	6952.24	6234.64	5362.2	9280.72	8992.77	10003.4	8729	6798.39	6183.03	9425.62	0.778829	0.0040939	1.52443	0.0252055	1.38645	0.0188409	0.708332	0.0566349	14	5	79.0906	Nucleoside diphosphate kinase B OS=Mus musculus GN=Nme2
P05201	Got1	1989.08	1793.73	1915.08	1158.06	1215.34	1115.75	1362.29	1319.3	1159.75	1630.9	1577.06	1261.34	1899.3	1163.05	1280.44	1489.77	0.612357	0.00794565	1.16348	0.276907	1.28092	0.12622	0.674167	0.0199604	7	3	42.7277	Aspartate aminotransferase, cytoplasmic OS=Mus musculus GN=Got1
Q9D0M5	Dynll2	8177.1	8217.21	8291.75	7239.84	6992.01	7296.01	7453.88	7359.59	7325.64	6863.99	6669.14	7324.95	8228.68	7175.95	7379.71	6952.69	0.872066	0.0141614	0.942137	0.220611	0.968887	0.42253	0.896827	0.00684015	5	2	30.749	Dynein light chain 2, cytoplasmic OS=Mus musculus GN=Dynll2
Q8BHN3	Ganab	17350.9	17257.4	16285.9	13286	12887.8	11787.9	14357.2	14141.7	13460.7	15916.3	16319.1	15556.4	16964.7	12653.9	13986.5	15930.6	0.745895	0.00972333	1.139	0.0234994	1.25895	0.017738	0.824449	0.000252757	14	7	81.1883	Neutral alpha-glucosidase AB OS=Mus musculus GN=Ganab
Q9QZZ6	Dpt	6762.49	6679.56	7073.07	5620.86	5511.28	5778.29	8990.49	8961.44	8438.77	7988.33	7585.2	7765.61	6838.38	5636.81	8796.9	7779.71	0.824291	0.00972333	0.88437	0.0375877	1.38016	0.00226408	1.2864	0.0216864	7	4	47.5242	Dermatopontin OS=Mus musculus GN=Dpt
Q8BFW7	Lpp	2489.78	2376.92	2574.01	1036.47	995.319	783.537	2180.62	2172.79	2122.14	2657.69	2620.97	2852.73	2480.24	938.441	2158.52	2710.47	0.378368	0.00261529	1.25571	0.0366742	2.88826	0.00130266	0.870288	0.0437329	9	3	72.3474	Lipoma-preferred partner homolog OS=Mus musculus GN=Lpp
P35700	Prdx1	242009	235483	233411	236204	241790	246950	283098	280023	280200	248096	246432	250747	236968	241648	281107	248425	1.01975	0.372558	0.883739	0.00327872	1.02805	0.183172	1.18627	0.00195113	38	29	194.918	Peroxiredoxin-1 OS=Mus musculus GN=Prdx1
P68368	Tuba4a	2260.84	2111.73	2475.07	2437.89	2687.38	2522.5	2547.64	2181.04	2190.47	2108.86	2102.97	1875.3	2282.55	2549.25	2306.38	2029.04	1.11685	0.160682	0.87975	0.200688	0.795936	0.0180136	1.01044	0.90179	29	2	155.582	Tubulin alpha-4A chain OS=Mus musculus GN=Tuba4a
P58021	Tm9sf2	24467.9	22806.3	21567.8	22302.9	21796.4	20802.6	29751.2	30243	30657.5	33432.6	32952.6	32364	22947.3	21634	30217.2	32916.4	0.942766	0.317866	1.08933	0.016215	1.52152	0.0012188	1.31681	0.0256738	16	10	121.809	Transmembrane 9 superfamily member 2 OS=Mus musculus GN=Tm9sf2
Q8CIE6	Copa	7324.56	7125.68	6588.37	4393.92	3964.08	3891.67	3834.64	3743.19	3883.26	7861.87	7821.07	7470.36	7012.87	4083.22	3820.37	7717.77	0.582247	0.00546393	2.02016	0.00585745	1.89012	0.00129427	0.544765	0.00409998	4	2	19.4739	Coatomer subunit alpha OS=Mus musculus GN=Copa
P03995	Gfap	7915.14	7687.68	7670.23	7251.74	6921.68	6761.54	7149.1	6601.78	6494.69	8566.83	8559.98	8303.58	7757.68	6978.32	6748.52	8476.79	0.899537	0.0360803	1.2561	0.0245805	1.21473	0.00756249	0.869915	0.0190088	36	4	153.616	Glial fibrillary acidic protein OS=Mus musculus GN=Gfap
O35737	Hnrnph1	5776.37	5788.98	5309.34	3940.42	3467.53	2865.71	6808.24	6844.87	6462.53	6335.77	6183.78	6113.35	5624.9	3424.55	6705.21	6210.97	0.608821	0.0229488	0.926289	0.0725927	1.81366	0.0204833	1.19206	0.00336392	12	1	119.421	Heterogeneous nuclear ribonucleoprotein H OS=Mus musculus GN=Hnrnph1
Q9DCV7	Krt7	67239.4	64961.8	63177.6	62838.7	64355.8	61786.1	71415.1	71104.4	66527.5	75671.4	76221.3	72041.5	65126.3	62993.5	69682.3	74644.7	0.967252	0.268041	1.07121	0.12478	1.18496	0.0104045	1.06996	0.0289576	59	14	349.535	Keratin, type II cytoskeletal 7 OS=Mus musculus GN=Krt7
Q9QYB5	Add3	30974.9	29711.4	29791.5	34965.9	37125.9	37622.4	43312.8	43714	41907.2	33394.9	35105.2	34732.1	30159.3	36571.4	42978	34410.8	1.21261	0.0195569	0.80066	0.00585745	0.94092	0.130292	1.42503	0.00204784	20	6	107.857	Gamma-adducin OS=Mus musculus GN=Add3
P11679	Krt8	1.29798e+06	1.27893e+06	1.25284e+06	1.18944e+06	1.15993e+06	1.14866e+06	1.41658e+06	1.41191e+06	1.36887e+06	1.4459e+06	1.44861e+06	1.4211e+06	1.27658e+06	1.16601e+06	1.39912e+06	1.43854e+06	0.913384	0.0136067	1.02817	0.160837	1.23373	0.00153346	1.09599	0.00158442	259	152	902.832	Keratin, type II cytoskeletal 8 OS=Mus musculus GN=Krt8
P60335	Pcbp1	3765.52	3597.76	4002.91	2564.76	2285.53	2183.61	3390.05	3444.6	3847.82	4596.5	3976.1	4063.72	3788.73	2344.63	3560.82	4212.11	0.618844	0.00621531	1.1829	0.104155	1.79649	0.00880976	0.939845	0.0979327	17	2	93.3681	Poly(rC)-binding protein 1 OS=Mus musculus GN=Pcbp1
Q8K419	Lgals4	165064	160763	159296	160364	161820	164032	181414	178291	175326	187157	185905	190143	161708	162072	178344	187735	1.00225	0.896232	1.05266	0.0417633	1.15834	0.00161474	1.10288	0.000819388	35	27	154.621	Galectin-4 OS=Mus musculus GN=Lgals4
P16125	Ldhb	3267.97	3395.17	3612.42	2795.24	2590.1	2650.49	3314.95	3352.09	3488.62	3590.39	3406.62	3229.35	3425.19	2678.61	3385.22	3408.79	0.782034	0.0189877	1.00696	0.887091	1.2726	0.0168883	0.988332	0.515764	15	3	85.3271	L-lactate dehydrogenase B chain OS=Mus musculus GN=Ldhb
Q91X72	Hpx	7025.68	6494.7	7305.8	7167.44	6956.57	6553.16	8889.09	8412.04	8696.93	8904.94	8462.16	8360.53	6942.06	6892.39	8666.02	8575.88	0.992845	0.903212	0.989598	0.753432	1.24425	0.00828158	1.24834	0.0125075	10	4	57.3213	Hemopexin OS=Mus musculus GN=Hpx
P05784	Krt18	118464	117418	115726	98415.1	98074.8	99270.3	116586	114837	113858	120347	119066	118026	117203	98586.8	115094	119146	0.841164	0.0040939	1.03521	0.047572	1.20854	0.00149912	0.982003	0.0123353	59	33	375.963	Keratin, type I cytoskeletal 18 OS=Mus musculus GN=Krt18
P70419	Galnt3	1478.86	1533.61	1425.5	1202.18	1235.13	1131.39	1328.69	1482.45	1393.13	1930.5	1671.89	1726.59	1479.32	1189.57	1401.42	1776.33	0.804129	0.0113724	1.26752	0.0543012	1.49326	0.0203273	0.947341	0.174258	4	2	25.6666	Polypeptide N-acetylgalactosaminyltransferase 3 OS=Mus musculus GN=Galnt3
Q8R1B4	Eif3c	5757.31	5939.17	5470.35	5616	6168.83	5619.17	10353.8	9880.83	10753.3	9034.29	9471.05	8488.24	5722.28	5801.33	10329.3	8997.86	1.01382	0.795747	0.8711	0.0577595	1.551	0.00592992	1.8051	0.00659452	15	4	78.6048	Eukaryotic translation initiation factor 3 subunit C OS=Mus musculus GN=Eif3c
Q9CXW3	Cacybp	1921.13	1986.4	1838.55	2542.07	2419.7	2541.36	2789.52	3017.02	2889.8	2172.76	2194.88	2011.15	1915.36	2501.04	2898.78	2126.27	1.30578	0.00504674	0.733504	0.00928918	0.850151	0.0181533	1.51344	0.00305269	3	1	16.272	Calcyclin-binding protein OS=Mus musculus GN=Cacybp
P30306	Cdc25b	5386.91	5297.08	5509.04	1883.58	1585.95	1469.31	1320.21	798.669	805.719	5540.55	5557.59	5748.58	5397.68	1646.28	974.868	5615.57	0.304998	0.00232381	5.76034	0.00585745	3.41107	0.00130266	0.180609	0.00910952	5	2	21.0084	M-phase inducer phosphatase 2 OS=Mus musculus GN=Cdc25b
Q9CY64	Blvra	4252.08	4404.72	4266.36	5668.84	5361.34	5570.52	4024.42	3924.63	3798.73	3877.41	4007.43	4007.71	4307.72	5533.57	3915.93	3964.18	1.28457	0.00701558	1.01232	0.644473	0.716389	0.00393486	0.909049	0.0420995	7	2	53.4985	Biliverdin reductase A OS=Mus musculus GN=Blvra
Q9CZX8	Rps19	18552.3	16407.6	18028.5	14826.7	16047	15413	18481.5	18998.1	19444.7	17497.3	17518.7	17462.1	17662.8	15428.9	18974.8	17492.7	0.873527	0.0877699	0.921893	0.0687316	1.13376	0.0446081	1.07428	0.235809	10	4	81.905	40S ribosomal protein S19 OS=Mus musculus GN=Rps19
Q9DB05	Napa	8277.99	7771.21	7634.27	9124.25	9972.22	9817.86	14316.7	14693.2	16173.3	14835.2	14505.5	13396.2	7894.49	9638.11	15061.1	14245.6	1.22087	0.0216282	0.945859	0.398361	1.47805	0.00731982	1.90779	0.00818023	6	3	36.2172	Alpha-soluble NSF attachment protein OS=Mus musculus GN=Napa
P32921	Wars	3594	3526.1	3483.42	2727.86	2818.55	2622.47	4857.42	4701.87	4307.55	4538.31	4466.05	3953.15	3534.51	2722.96	4622.28	4319.17	0.770393	0.0059778	0.934425	0.36264	1.5862	0.0182674	1.30776	0.0105517	10	4	71.2098	Tryptophan--tRNA ligase, cytoplasmic OS=Mus musculus GN=Wars
P07724	Alb	435585	428365	438742	485888	500065	510233	596493	602520	603444	490539	485034	490121	434231	498728	600819	488565	1.14853	0.0170035	0.813164	0.00076382	0.979621	0.329854	1.38364	0.000651254	84	58	307.848	Serum albumin OS=Mus musculus GN=Alb
P27600	Gna12	5824.31	5925.05	6065.16	6427.85	6569.64	6272.64	6510.91	5392.73	5987.78	4101.24	4425.63	4604.7	5938.17	6423.37	5963.81	4377.19	1.08171	0.0306018	0.733959	0.0558494	0.681447	0.00447675	1.00432	0.982414	9	2	43.7259	Guanine nucleotide-binding protein subunit alpha-12 OS=Mus musculus GN=Gna12
Q9D1Q6	Erp44	2852.03	2943.24	3087.38	3339.46	3342.15	3524.63	3442.47	3611.93	3961.54	2762.28	2457.19	2702.5	2960.88	3402.08	3671.98	2640.66	1.14901	0.0235103	0.719137	0.0276882	0.776189	0.0110887	1.24016	0.00719644	11	2	73.5871	Endoplasmic reticulum resident protein 44 OS=Mus musculus GN=Erp44
Q8BI84	Mia3	7220.72	7303.91	6858.79	8648.81	8573.65	8200.99	8718.49	9329.19	9523.21	7218.96	7632.52	7362.9	7127.81	8474.48	9190.3	7404.79	1.18893	0.0103575	0.805719	0.0269349	0.873775	0.012016	1.28936	0.0246282	32	7	186.583	Melanoma inhibitory activity protein 3 OS=Mus musculus GN=Mia3
Q6DIC0	Smarca2	2234.71	2429.84	2525.11	3350.58	3743.49	3959.68	1563.48	1972.38	1678.87	1355.12	1383.6	1395.41	2396.55	3684.58	1738.24	1378.04	1.53745	0.0230468	0.79278	0.15055	0.374003	0.0141518	0.72531	0.0323643	5	2	17.0362	Probable global transcription activator SNF2L2 OS=Mus musculus GN=Smarca2
Q6P9R2	Oxsr1	4055.29	4402.49	4807.22	3697.47	3901.51	3514.98	3665.75	3732.66	3057.2	3629.02	3942.4	3898.13	4421.66	3704.65	3485.2	3823.18	0.837842	0.0971278	1.09698	0.327157	1.03199	0.51383	0.788211	0.157093	2	1	10.1905	Serine/threonine-protein kinase OSR1 OS=Mus musculus GN=Oxsr1
P57784	Snrpa1	5695.52	5187.54	5344.31	5419.45	5467.15	5495.53	5921.04	5769.7	6026.71	5724.01	5982.82	5531.57	5409.12	5460.71	5905.82	5746.13	1.00954	0.808668	0.972962	0.438909	1.05227	0.192545	1.09183	0.0720889	3	3	17.3605	U2 small nuclear ribonucleoprotein A' OS=Mus musculus GN=Snrpa1
P39054	Dnm2	3050.89	3225.54	2946.7	1718.16	1840.69	1647.98	2159.62	1843.07	1729.46	2661.1	2348.64	2649.21	3074.38	1735.61	1910.72	2552.98	0.56454	0.00406968	1.33614	0.0479121	1.47094	0.0133903	0.621496	0.0191858	18	3	103.814	Dynamin-2 OS=Mus musculus GN=Dnm2
Q61990	Pcbp2	2665.68	2827.74	2719.35	3004.35	3138.45	3426.9	3459.74	3857.25	3632.97	3105.65	3007.49	3015.49	2737.59	3189.9	3649.99	3042.88	1.16522	0.0877699	0.833668	0.0603123	0.953909	0.403746	1.33328	0.00251668	14	1	75.4431	Poly(rC)-binding protein 2 OS=Mus musculus GN=Pcbp2
P28474	Adh5	4076.88	4381.37	4474.88	4300.92	4569.42	4603.02	4691.31	4874.7	5061.63	4354.89	4411.21	4758.9	4311.04	4491.12	4875.88	4508.34	1.04177	0.367785	0.92462	0.145596	1.00383	0.928606	1.13102	0.00614861	13	5	66.5917	Alcohol dehydrogenase class-3 OS=Mus musculus GN=Adh5
P70333	Hnrnph2	3344.98	3201.66	3484.43	1956.05	1987.77	1852.88	4138.02	4164.34	3551.62	3683.19	3669.19	3566	3343.69	1932.24	3951.33	3639.46	0.577875	0.00530988	0.921072	0.330926	1.88355	0.000408141	1.18173	0.156737	12	1	112.497	Heterogeneous nuclear ribonucleoprotein H2 OS=Mus musculus GN=Hnrnph2
P54071	Idh2	35657.1	35108.7	35293	29083.6	29477.8	28576.4	32933.7	34002.4	33355.2	39304.1	37515.8	37618.9	35352.9	29045.9	33430.4	38146.3	0.821599	0.00232381	1.14106	0.0223978	1.31331	0.00506646	0.94562	0.0549669	29	16	187.257	Isocitrate dehydrogenase [NADP], mitochondrial OS=Mus musculus GN=Idh2
Q9CQZ5	Ndufa6	1183.79	1134.55	1320.71	960.552	842.441	874.165	1562.22	1588.99	1663.98	1367.07	1230.92	1181.88	1213.02	892.386	1605.06	1259.96	0.735674	0.0300019	0.784989	0.0344775	1.4119	0.0179776	1.3232	0.0116095	2	1	17.6928	NADH dehydrogenase [ubiquinone] 1 alpha subcomplex subunit 6 OS=Mus musculus GN=Ndufa6
Q07417	Acads	55885.7	55766.6	56398.5	52448.3	51445.8	50757.1	48320	49150.1	48635.7	52570.1	51508.5	51860.1	56016.9	51550.4	48701.9	51979.6	0.920264	0.0185765	1.0673	0.0113696	1.00833	0.550568	0.869414	0.00239934	22	12	139.675	Short-chain specific acyl-CoA dehydrogenase, mitochondrial OS=Mus musculus GN=Acads
Q8K0C9	Gmds	64747.3	64413.4	67426.5	62368.6	62821.8	63318.2	85447.6	87565.7	89779	78561.5	79581.6	81229.7	65529.1	62836.2	87597.4	79790.9	0.958906	0.138779	0.910882	0.0324369	1.26982	0.00409011	1.33677	0.00091498	21	13	179.896	GDP-mannose 4,6 dehydratase OS=Mus musculus GN=Gmds
P47753	Capza1	700.403	636.933	653.441	879.016	864.217	842.926	696.425	608.154	742.573	687.407	619.549	699.443	663.592	862.053	682.384	668.8	1.29907	0.0105105	0.980093	0.825745	0.775822	0.0179244	1.02832	0.677847	5	1	37.1691	F-actin-capping protein subunit alpha-1 OS=Mus musculus GN=Capza1
Q9JM76	Arpc3	16453.7	16976.8	16136.9	11584.1	12242.6	11717.5	16792.5	15534.8	16256.1	17741.3	16674	17662.8	16522.5	11848	16194.5	17359.4	0.717086	0.00259014	1.07193	0.131702	1.46517	0.00329757	0.980147	0.614377	9	8	76.291	Actin-related protein 2/3 complex subunit 3 OS=Mus musculus GN=Arpc3
P62806	Hist1h4a	324981	328428	328913	240744	242071	240862	250431	250963	245743	285002	278954	282233	327441	241226	249045	282063	0.7367	0.0013791	1.13258	0.0045547	1.16929	0.00505913	0.760582	0.00113528	41	35	115.295	Histone H4 OS=Mus musculus GN=Hist1h4a
Q69ZF7	Cnnm4	1559.51	1449.36	1335.22	999.563	1229.32	1001.92	712.226	565.412	547.881	703.558	721.848	800.02	1448.03	1076.93	608.506	741.808	0.743723	0.0435582	1.21906	0.164672	0.688815	0.0526185	0.42023	0.00282659	15	2	80.7322	Metal transporter CNNM4 OS=Mus musculus GN=Cnnm4
O35459	Ech1	7883.57	7193.32	7572.5	7956.46	7987.01	8165.76	7983.57	8011.92	7755.1	9425.12	10017.6	10121.7	7549.79	8036.41	7916.86	9854.83	1.06445	0.17177	1.24479	0.0250899	1.22627	0.019605	1.04862	0.25057	9	5	48.3527	Delta(3,5)-Delta(2,4)-dienoyl-CoA isomerase, mitochondrial OS=Mus musculus GN=Ech1
Q9CPT4	Mydgf	2648.4	2564.37	2565.3	3178.28	2867.3	2939.02	1852.09	1904.78	1576.93	1884.28	1732.07	1794.1	2592.69	2994.87	1777.94	1803.48	1.15512	0.0716284	1.01437	0.869112	0.602191	0.0069727	0.685749	0.0208469	3	2	18.2573	UPF0556 protein C19orf10 homolog OS=Mus musculus GN=D17Wsu104e
Q6NXK7	Dpp10	5674.62	5193.24	5205.41	7621.77	8512.18	8890.2	13403.9	12857.2	13145.4	10552.5	10945	10729.7	5357.76	8341.38	13135.5	10742.4	1.55688	0.0222139	0.817813	0.00622043	1.28784	0.0303111	2.45168	0.000487235	7	2	34.4548	Inactive dipeptidyl peptidase 10 OS=Mus musculus GN=Dpp10
Q64435	Ugt1a6	2232	2294.2	2271.23	3715.58	3636.39	3458.59	2180.86	2141.55	2149.38	2629.79	2547.7	2626.89	2265.81	3603.52	2157.26	2601.46	1.59039	0.00972333	1.20591	0.00928918	0.721922	0.00864456	0.952094	0.0683772	14	2	77.6055	UDP-glucuronosyltransferase 1-6 OS=Mus musculus GN=Ugt1a6
P97450	Atp5j	29312	27989.4	29020.5	21308.5	23317.6	23651.7	33440.8	33427.8	32199.1	29967.1	29358.7	29482.5	28774	22759.3	33022.5	29602.8	0.790968	0.0168055	0.896441	0.0245805	1.30069	0.017986	1.14765	0.0234245	13	7	68.823	ATP synthase-coupling factor 6, mitochondrial OS=Mus musculus GN=Atp5j
Q99N50	Sytl2	1862.76	2007.39	2148.04	2734.47	3032.83	3152.92	4074.77	4231.95	4617.3	3720.48	3960.65	4184.2	2006.06	2973.41	4308	3955.11	1.48221	0.0162823	0.918083	0.236303	1.33016	0.0144236	2.14749	0.000194523	4	1	14.1753	Synaptotagmin-like protein 2 OS=Mus musculus GN=Sytl2
P56379	Mp68	8499.87	8929.37	9098.89	6943.05	7087.98	7290.46	8082.64	7557.18	7792.54	7875.75	7537.84	7221.51	8842.71	7107.16	7810.79	7545.03	0.803732	0.0115062	0.965976	0.414754	1.06161	0.16512	0.883303	0.0786858	1	1	15.5702	6.8 kDa mitochondrial proteolipid OS=Mus musculus GN=Mp68
P70296	Pebp1	59203.8	59961.3	60620.4	59747.5	58460.6	59432.5	64637.9	65311.7	63845.8	59365.5	58441.4	58695.4	59928.5	59213.5	64598.5	58834.1	0.988069	0.332016	0.910767	0.00844209	0.993592	0.517084	1.07793	0.0231519	10	7	57.9936	Phosphatidylethanolamine-binding protein 1 OS=Mus musculus GN=Pebp1
Q9CPR4	Rpl17	2338.38	2422.72	2520.12	2852.59	2625.01	2601.23	1930.1	1980.34	2203.05	1905.17	1944.33	1955.36	2427.07	2692.94	2037.83	1934.95	1.10954	0.0947176	0.949518	0.422758	0.718528	0.0194234	0.839624	0.0138802	6	2	38.2733	60S ribosomal protein L17 OS=Mus musculus GN=Rpl17
Q80X90	Flnb	98315.6	100504	100354	95796.2	94513.3	92512.1	102058	102291	103846	107339	106909	106696	99724.3	94273.9	102731	106982	0.945346	0.0297105	1.04137	0.0337953	1.13479	0.0115911	1.03015	0.0398521	83	39	582.382	Filamin-B OS=Mus musculus GN=Flnb
P16460	Ass1	9400.44	9376.64	9108.01	4673.16	4519.75	4127.06	7895.57	7715.64	7041.39	7099.24	6648.83	7012.54	9295.03	4439.99	7550.87	6920.2	0.477674	0.00198798	0.916477	0.180845	1.55861	0.00277459	0.812356	0.0139364	10	4	58.1635	Argininosuccinate synthase OS=Mus musculus GN=Ass1
P21619	Lmnb2	12886	13480	13143.5	13896.4	14707.8	14265.3	15973.3	15828.2	16155.1	13453.3	13570.9	14863.8	13169.8	14289.9	15985.5	13962.7	1.08505	0.0434925	0.873457	0.0798361	0.977103	0.610339	1.2138	0.00745085	38	7	209.637	Lamin-B2 OS=Mus musculus GN=Lmnb2
Q9Z0S1	Bpnt1	4695.81	4158.19	4230.2	4872.71	4692.02	4733.25	4351.49	4145.61	4003.9	4149.31	4236.49	3771.38	4361.4	4765.99	4167	4052.39	1.09277	0.175247	0.972495	0.623498	0.850272	0.0421255	0.955428	0.175749	10	3	66.8039	3'(2'),5'-bisphosphate nucleotidase 1 OS=Mus musculus GN=Bpnt1
Q60598	Cttn	18527.7	18929.9	19215.8	21594.2	20958.8	21668.2	25054.1	24457.6	24123.5	21316.7	19938.1	19999.4	18891.2	21407.1	24545.1	20418.1	1.13318	0.0070606	0.831859	0.0166734	0.953799	0.180055	1.29929	0.00675981	22	9	164.355	Src substrate cortactin OS=Mus musculus GN=Cttn
Q9NYQ2	Hao2	1433.39	1382.44	1277.74	892.772	673.539	583.859	894.447	853.888	720.853	1337.74	1343.48	1301.3	1364.52	716.723	823.062	1327.51	0.525256	0.023163	1.61289	0.0269781	1.85219	0.0343738	0.603187	0.00394537	3	1	16.0988	Hydroxyacid oxidase 2 OS=Mus musculus GN=Hao2
O88844	Idh1	71639.6	70384.9	69060.5	84672.3	82678.9	79109.2	85301.8	82365.6	79742.9	85129.8	82113.9	83429.5	70361.6	82153.5	82470.1	83557.7	1.16759	0.0234382	1.01319	0.65994	1.01709	0.543621	1.17209	0.003133	26	15	177.381	Isocitrate dehydrogenase [NADP] cytoplasmic OS=Mus musculus GN=Idh1
P46638	Rab11b	19027.8	17803.3	19673.2	20861.5	22538.8	22592.2	18774.6	18705.8	18440.8	16295.3	15357	16431.4	18834.8	21997.5	18640.4	16027.9	1.16792	0.0353436	0.859846	0.0344775	0.728624	0.00746977	0.989681	0.799639	6	4	26.929	Ras-related protein Rab-11B OS=Mus musculus GN=Rab11b
P07310	Ckm	2673.38	2691.02	2042.1	3119.18	2977.22	2849.95	1873.05	2046.89	1872.51	1837.47	1548	1714.43	2468.83	2982.11	1930.82	1699.97	1.2079	0.173218	0.880439	0.148286	0.570054	0.00282341	0.782077	0.0955687	7	2	37.2814	Creatine kinase M-type OS=Mus musculus GN=Ckm
Q9CWF2	Tubb2b	3173.54	3023.08	2903.61	2709.27	2788.41	2801.7	2248.74	2418.52	2326.15	2119.61	2200.05	2313.19	3033.41	2766.46	2331.14	2210.95	0.911997	0.0981933	0.948443	0.252722	0.799198	0.00950844	0.768487	0.0230852	18	1	157.681	Tubulin beta-2B chain OS=Mus musculus GN=Tubb2b
Q5SWT3	Slc25a35	753.685	701.284	754.313	739.678	735.244	744.675	812.985	795.754	822.662	708.151	874.321	995.005	736.427	739.865	810.467	859.159	1.00467	0.893791	1.06008	0.679992	1.16124	0.33264	1.10054	0.0245706	2	1	9.5703	Solute carrier family 25 member 35 OS=Mus musculus GN=Slc25a35
P51150	Rab7a	49242.8	48633.8	47951	47760.1	49226.7	49016	52477.3	54992	54419	47311.9	47861.4	48150.9	48609.2	48667.6	53962.8	47774.7	1.0012	0.946099	0.885328	0.0311776	0.981654	0.219249	1.11013	0.0361283	22	14	147.134	Ras-related protein Rab-7a OS=Mus musculus GN=Rab7a
P26231	Ctnna1	14205.9	14698.4	14357.3	17155.3	17500.3	17261	15718.2	15679.9	15599.5	13535	13118.9	13687.3	14420.5	17305.5	15665.9	13447.1	1.20006	0.00274211	0.858367	0.0200348	0.777039	0.00181251	1.08636	0.0157869	30	11	188.168	Catenin alpha-1 OS=Mus musculus GN=Ctnna1
P14069	S100a6	38295.2	38567	41215.4	47899.8	48118.5	51291.8	56985.4	62286.3	63413.5	60326	58334.1	58436.2	39359.2	49103.3	60895.1	59032.1	1.24757	0.0113724	0.969407	0.529292	1.2022	0.00986222	1.54716	0.00295997	16	11	74.4953	Protein S100-A6 OS=Mus musculus GN=S100a6
Q8BG32	Psmd11	19605.5	19636.7	18817.5	13914	14804.4	14614.2	19223.5	19354.8	19922.6	16986.1	17197	16616.9	19353.2	14444.2	19500.3	16933.3	0.746345	0.0030483	0.868364	0.00897803	1.17233	0.00916002	1.0076	0.786734	18	6	107.926	26S proteasome non-ATPase regulatory subunit 11 OS=Mus musculus GN=Psmd11
Q91YI0	Asl	634.376	569.485	459.59	532.887	600.011	490.098	374.825	545.481	379.62	466.88	373.099	474.787	554.484	540.999	433.309	438.255	0.97568	0.871754	1.01142	0.958698	0.810086	0.11533	0.781463	0.218104	8	1	49.9846	Argininosuccinate lyase OS=Mus musculus GN=Asl
P35486	Pdha1	16913.1	17894.5	18113.3	17424.3	16466.3	16551.9	14195	15417.1	14867.7	15002.2	15124.6	14840.2	17640.3	16814.2	14826.6	14989	0.95317	0.21239	1.01095	0.748715	0.89145	0.035825	0.840496	0.00641822	22	10	139.679	Pyruvate dehydrogenase E1 component subunit alpha, somatic form, mitochondrial OS=Mus musculus GN=Pdha1
Q9CRB9	Chchd3	17210.2	17060.2	17327.6	19115.1	19499.3	18726.1	19009.8	20226.2	18839.6	15745.9	15391.6	14837.8	17199.4	19113.5	19358.5	15325.1	1.11129	0.0223398	0.791646	0.0166606	0.801794	0.00300682	1.12554	0.0474668	17	4	110.71	Coiled-coil-helix-coiled-coil-helix domain-containing protein 3, mitochondrial OS=Mus musculus GN=Chchd3
Q6IFZ9	Krt74	849.23	924.518	887.202	1088.23	907.885	1170.15	513.718	518.33	373.73	717.169	760.176	673.878	886.983	1055.42	468.593	717.074	1.1899	0.204175	1.53027	0.0473543	0.679419	0.0576128	0.528299	0.0276579	19	2	106.294	Keratin, type II cytoskeletal 74 OS=Mus musculus GN=Krt74 PE=3
Q9DBJ1	Pgam1	6171.45	6262.25	5776.02	5600.8	6696.78	6813.28	10772.6	11105.8	11374.3	9786.49	10057.5	9527.52	6069.91	6370.29	11084.2	9790.5	1.04949	0.58684	0.883283	0.0224944	1.5369	0.014769	1.82609	0.00391755	4	2	28.1969	Phosphoglycerate mutase 1 OS=Mus musculus GN=Pgam1
Q9R1P0	Psma4	21910.5	21411.8	21605.9	22515.6	21512.3	20894.9	21899.9	21411.6	20572.4	20831.5	20643.3	20343	21642.7	21640.9	21294.6	20605.9	0.999915	0.997329	0.96766	0.281435	0.952176	0.185903	0.983915	0.416841	10	8	57.2314	Proteasome subunit alpha type-4 OS=Mus musculus GN=Psma4
Q99KK2	Cmas	8849.92	8687.24	9236.01	9879.31	9924.43	10571.2	9208.97	9801.24	9963.97	8621.08	8519.29	8414.14	8924.39	10125	9658.06	8518.17	1.13453	0.0333988	0.881975	0.0665097	0.841302	0.0261945	1.08221	0.078035	11	3	59.2147	N-acylneuraminate cytidylyltransferase OS=Mus musculus GN=Cmas
Q9CXT8	Pmpcb	360.024	351.281	540.99	285.772	209.901	272.07	248.329	265.819	263.284	359.164	317.944	318.243	417.432	255.914	259.144	331.784	0.613068	0.151249	1.28031	0.0524034	1.29646	0.0860578	0.620806	0.0767188	3	1	19.0083	Mitochondrial-processing peptidase subunit beta OS=Mus musculus GN=Pmpcb
O55222	Ilk	9927.93	9576.05	10116.1	12085	12508.7	13363.5	14583.2	15451.2	15598.3	13246.4	13903.9	13698.2	9873.38	12652.4	15210.9	13616.2	1.28146	0.0238801	0.895159	0.0478634	1.07618	0.137256	1.5406	0.00391575	8	4	60.4817	Integrin-linked protein kinase OS=Mus musculus GN=Ilk
Q91WK0	Lrrfip2	4200.89	4484.79	5766.46	4848.7	4492.33	5437.1	4683.18	4061.06	5073.27	3370.73	4244.49	4657.61	4817.38	4926.04	4605.84	4090.95	1.02256	0.88844	0.888209	0.425103	0.830473	0.191693	0.956088	0.648917	14	3	93.4366	Leucine-rich repeat flightless-interacting protein 2 OS=Mus musculus GN=Lrrfip2
P56395	Cyb5a	26124.9	25479.2	24866	37817.5	40499.2	44433.4	33018.4	34487.1	33982.3	26899.3	27180.8	26457.3	25490.1	40916.7	33829.3	26845.8	1.6052	0.0304179	0.793567	0.00855751	0.656109	0.0305522	1.32716	0.00747202	9	5	62.8672	Cytochrome b5 OS=Mus musculus GN=Cyb5a
P09103	P4hb	249535	243991	246609	266893	259510	262342	307969	312003	307894	275591	271730	276038	246711	262915	309289	274453	1.06568	0.0166955	0.887369	0.00327872	1.04389	0.0281957	1.25365	0.0021289	66	44	382.605	Protein disulfide-isomerase OS=Mus musculus GN=P4hb
P11499	Hsp90ab1	179437	177147	178029	194397	198190	202727	228919	231399	234452	200677	196988	200234	178205	198438	231590	199300	1.11354	0.0249038	0.860571	0.0044864	1.00434	0.794624	1.29957	0.00131882	83	29	409.675	Heat shock protein HSP 90-beta OS=Mus musculus GN=Hsp90ab1
Q07076	Anxa7	9865.5	9352.68	9234.22	8097.5	8424.69	8371.2	10250.1	10185.3	9556.55	10801.4	10747.5	9690.91	9484.13	8297.8	9997.32	10413.3	0.874914	0.0294687	1.04161	0.467988	1.25494	0.0363272	1.05411	0.084719	13	7	72.3815	Annexin A7 OS=Mus musculus GN=Anxa7
Q91WS0	Cisd1	9410.8	9239.45	9446.74	7809.97	8161.9	8135.94	10790.5	10626.6	10075.1	10429.3	10175.3	10494.7	9365.66	8035.94	10497.4	10366.4	0.858021	0.0083283	0.98752	0.683276	1.29001	0.00157461	1.12084	0.0439744	5	2	40.393	CDGSH iron-sulfur domain-containing protein 1 OS=Mus musculus GN=Cisd1
Q99JY0	Hadhb	58145	61751.8	62684	61916.8	58113.4	59285.4	67277.4	66619.4	63271.3	73917.8	73783	73531.3	60860.3	59771.9	65722.7	73744	0.982116	0.632124	1.12205	0.0532459	1.23376	0.0146257	1.07989	0.189947	25	12	142.848	Trifunctional enzyme subunit beta, mitochondrial OS=Mus musculus GN=Hadhb
Q9D8E6	Rpl4	7407.51	7482.89	7718.47	5596.95	5572.98	5182.64	2894.11	3235	2737.26	3591.33	3564.23	3556.35	7536.29	5450.86	2955.46	3570.64	0.723282	0.00427505	1.20815	0.0940457	0.65506	0.0125143	0.392164	0.00369296	10	4	55.844	60S ribosomal protein L4 OS=Mus musculus GN=Rpl4
Q68FH4	Galk2	6820.68	6323.86	5877.33	6429.3	6714.09	6151.15	8234.58	8886.9	8190.54	7877.42	7750.96	7703.65	6340.62	6431.51	8437.34	7777.34	1.01433	0.833332	0.921777	0.145646	1.20926	0.0192954	1.33068	0.0282778	6	2	40.4266	N-acetylgalactosamine kinase OS=Mus musculus GN=Galk2
Q7TNC6	Kif26b	2604.7	2516.44	2620.53	3243.27	3209.86	3140.01	3610.72	3287.21	3398.69	6091.81	6074.91	5823.17	2580.55	3197.71	3432.21	5996.63	1.23916	0.00259014	1.74717	0.00317823	1.87529	0.00240515	1.33003	0.00545018	5	1	21.4627	Kinesin-like protein KIF26B OS=Mus musculus GN=Kif26b
P61979	Hnrnpk	36382.6	36209.5	36061.7	38049.4	37391.7	37901.3	33963.8	35272.4	36820.3	34764.2	35761.7	33872.8	36217.9	37780.8	35352.2	34799.6	1.04315	0.0209133	0.984369	0.673468	0.921091	0.0363896	0.976096	0.440075	20	11	106.721	Heterogeneous nuclear ribonucleoprotein K OS=Mus musculus GN=Hnrnpk
P70372	Elavl1	10605.5	9916.64	9937.8	9654.11	9768.75	9176.92	9891.41	9359.06	9436.74	10383.9	10304.8	9699.1	10153.3	9533.26	9562.4	10129.3	0.938931	0.145564	1.05928	0.168016	1.06252	0.133888	0.941802	0.00769575	17	8	90.2448	ELAV-like protein 1 OS=Mus musculus GN=Elavl1
Q5SSH7	Zzef1	829.116	903.991	757.328	916.822	908.967	823.18	899.633	953.824	1074.98	795.16	745.074	732.419	830.145	882.989	976.147	757.551	1.06366	0.429904	0.776063	0.0765041	0.857939	0.0493714	1.17588	0.229074	6	1	26.2623	Zinc finger ZZ-type and EF-hand domain-containing protein 1 OS=Mus musculus GN=Zzef1
P37040	Por	8589.75	8771.26	9030.23	8539.5	9163.72	8781.69	9619.99	10543.7	10344.4	10278.7	10457.3	11026	8797.08	8828.3	10169.3	10587.4	1.00355	0.919423	1.04111	0.390011	1.19925	0.0115233	1.15599	0.0202578	9	5	53.6079	NADPH--cytochrome P450 reductase OS=Mus musculus GN=Por
P47791	Gsr	1846.65	1773.49	1429.9	267.155	263.204	189.509	941.367	482.389	392.576	1782.76	1703.35	1455.43	1683.35	239.956	605.444	1647.18	0.142547	0.0194489	2.72061	0.0344775	6.8645	0.00950844	0.359667	0.0345242	6	1	40.3543	Glutathione reductase, mitochondrial OS=Mus musculus GN=Gsr
Q03265	Atp5a1	312678	307541	306389	288427	282394	283863	324231	324071	319654	310134	305331	304939	308869	284895	322652	306801	0.922379	0.0059778	0.950874	0.0137976	1.07689	0.00456497	1.04462	0.0113122	74	55	352.481	ATP synthase subunit alpha, mitochondrial OS=Mus musculus GN=Atp5a1
Q61292	Lamb2	19384.1	18948.4	19157.7	17228.4	18771.6	18935.7	19335.5	19551.8	19303.4	18291	18295.2	18535.6	19163.4	18311.9	19396.9	18373.9	0.955565	0.313027	0.947261	0.00845997	1.00339	0.928753	1.01218	0.35005	32	10	188.493	Laminin subunit beta-2 OS=Mus musculus GN=Lamb2
O09106	Hdac1	3425.46	3303.54	3472.21	3326.05	3119.31	3338.45	3626	3511.59	3326.14	3338.75	3218.1	3261.61	3400.41	3261.27	3487.91	3272.82	0.959084	0.247221	0.938333	0.179141	1.00354	0.90718	1.02573	0.538854	5	3	30.9729	Histone deacetylase 1 OS=Mus musculus GN=Hdac1
Q8BH61	F13a1	4443.34	4574.82	4294.72	4000.29	4010.57	4012.41	5183.65	4982.08	5121.94	3542.04	3746.28	3429.73	4437.63	4007.76	5095.89	3572.68	0.903131	0.0611826	0.701091	0.00621261	0.891442	0.0624962	1.14834	0.0368884	7	3	45.2825	Coagulation factor XIII A chain OS=Mus musculus GN=F13a1
O08583	Alyref	2383.08	2365.01	2142.02	1368.62	1211.8	838.478	1813.48	1730.55	1618.6	1672.6	1759.47	1760.33	2296.71	1139.63	1720.88	1730.8	0.496203	0.0223494	1.00577	0.912846	1.51873	0.0830691	0.749281	0.00174327	7	1	43.2451	THO complex subunit 4 OS=Mus musculus GN=Alyref
Q91XA2	Golm1	13473.9	13070.1	13783.5	13327.1	14666.1	14290.8	16262.5	15758.6	15839.2	14294.1	13946.5	13310.1	13442.5	14094.7	15953.4	13850.2	1.04851	0.300768	0.868165	0.0262736	0.982657	0.686267	1.18679	0.00880844	14	6	112.913	Golgi membrane protein 1 OS=Mus musculus GN=Golm1
O88329	Myo1a	25572.2	25508.7	26605.5	29746	29758.1	31905.2	31872.1	33146.9	33272.6	33009.5	33238.4	33944.8	25895.5	30469.8	32763.9	33397.6	1.17665	0.0283193	1.01934	0.385894	1.09609	0.0608244	1.26524	0.00321469	36	12	197.455	Unconventional myosin-Ia OS=Mus musculus GN=Myo1a
O88322	Nid2	1770.81	1782.8	1864.76	1159.34	823.52	831.687	1154.83	813.154	937.749	1908.53	1888.87	2049.32	1806.12	938.183	968.579	1948.91	0.519446	0.0285891	2.01213	0.0171675	2.07732	0.0122311	0.536275	0.0272311	11	2	49.9464	Nidogen-2 OS=Mus musculus GN=Nid2
Q9D8N0	Eef1g	31474.3	31283.5	31363	31789.1	29165.8	30173.7	33637.7	34283.2	34046.8	31639.3	31010.6	29795	31373.6	30376.2	33989.2	30815	0.968209	0.380596	0.906611	0.0478453	1.01445	0.702972	1.08337	0.00824758	17	10	108.505	Elongation factor 1-gamma OS=Mus musculus GN=Eef1g
Q5SYD0	Myo1d	10033.6	9320.14	9346.52	8999.29	8714.65	8160.6	7867.39	8128.62	8441.82	11471.6	11296.6	10681	9566.77	8624.85	8145.95	11149.7	0.901543	0.0828467	1.36874	0.00881765	1.29274	0.0069989	0.851484	0.0635003	17	6	84.0141	Unconventional myosin-Id OS=Mus musculus GN=Myo1d
P29341	Pabpc1	20348.8	20617.4	20743.7	24463.3	24355.3	24729.3	25275.4	26370.2	27096.9	22082	21270.7	21386.2	20569.9	24515.9	26247.5	21579.6	1.19183	0.000962008	0.822159	0.0211768	0.880229	0.00864456	1.27601	0.00358167	25	14	148.598	Polyadenylate-binding protein 1 OS=Mus musculus GN=Pabpc1
P68510	Ywhah	33565.5	34466.8	34021.9	34379.3	33504	33966.7	35237	35768.3	36052.2	33914.7	35258.2	35265.1	34018.1	33950	35685.8	34812.6	0.998	0.891637	0.975532	0.252253	1.02541	0.225529	1.04903	0.0155641	27	6	210.304	14-3-3 protein eta OS=Mus musculus GN=Ywhah
P43276	Hist1h1b	5533.2	5679.27	5840.34	6279.23	5961.78	6727.2	4036.71	4431.11	4272.94	3428.95	3547.58	3815.23	5684.27	6322.74	4246.92	3597.25	1.11232	0.128578	0.847025	0.0431148	0.568939	0.00661931	0.747136	0.00559259	2	1	21.9947	Histone H1.5 OS=Mus musculus GN=Hist1h1b
Q8BH64	Ehd2	3001.92	3048.47	3154.51	2161.9	2228.72	2147.67	1961.8	2327.11	1941.58	2292.37	2157	2233.41	3068.3	2179.43	2076.83	2227.6	0.710305	0.00406968	1.07259	0.430008	1.0221	0.412122	0.676867	0.0255603	10	3	48.9669	EH domain-containing protein 2 OS=Mus musculus GN=Ehd2
Q8VHX6	Flnc	13326.6	13846.2	11689.5	11936.8	12971.5	12778.8	11596.9	11017	10084.3	22376.3	22108.9	20770.1	12954.1	12562.4	10899.4	21751.8	0.969758	0.682227	1.99568	0.00346415	1.7315	0.0023321	0.841387	0.0264645	60	8	336.813	Filamin-C OS=Mus musculus GN=Flnc
Q9ET30	Tm9sf3	9677	10139.2	9662.75	9348.67	9064.92	8880.66	11649.5	10926.3	10982.1	10162.4	9844.16	10433.3	9826.32	9098.08	11186	10146.6	0.925889	0.0493105	0.907082	0.0587972	1.11525	0.0203273	1.13837	0.055975	14	5	75.5409	Transmembrane 9 superfamily member 3 OS=Mus musculus GN=Tm9sf3
Q8BVI4	Qdpr	23745	24427.1	24291.2	20592.2	20871.5	21140	26550.8	27886.6	26929.5	25675.4	25580.4	24375.2	24154.4	20867.9	27122.3	25210.3	0.863937	0.00406968	0.929506	0.0638178	1.20809	0.0116062	1.12287	0.00561745	10	7	75.2475	Dihydropteridine reductase OS=Mus musculus GN=Qdpr
P50544	Acadvl	59204.4	61494.7	61326.6	64496.9	64294.4	63945	64871.9	64077.9	62050.4	68986.8	68851.2	68508.7	60675.2	64245.5	63666.7	68782.2	1.05884	0.0635875	1.08035	0.0548597	1.07062	0.000799098	1.0493	0.174607	41	27	280.728	Very long-chain specific acyl-CoA dehydrogenase, mitochondrial OS=Mus musculus GN=Acadvl
P17182	Eno1	158592	157860	156862	140000	138736	138858	156331	161338	159184	152395	147916	146206	157771	139198	158951	148839	0.882277	0.000934275	0.936386	0.039663	1.06926	0.0472713	1.00748	0.573481	51	18	289.701	Alpha-enolase OS=Mus musculus GN=Eno1
P70340	Smad1	939.247	1025.66	1060.11	989.158	833.061	807.804	1148.36	1244.67	1378.02	992.46	1018.86	1040.87	1008.34	876.675	1257.02	1017.39	0.869423	0.181925	0.809373	0.109322	1.16052	0.157338	1.24662	0.00974547	5	1	18.8776	Mothers against decapentaplegic homolog 1 OS=Mus musculus GN=Smad1
P49312	Hnrnpa1	10145.7	8928.33	9297.02	8232.05	8249.56	7622.41	9518.07	8388.19	7465.71	10183.1	9343.14	9598.48	9457.01	8034.68	8457.33	9708.24	0.8496	0.0675843	1.14791	0.223523	1.20829	0.0166537	0.894292	0.157467	18	4	113.892	Heterogeneous nuclear ribonucleoprotein A1 OS=Mus musculus GN=Hnrnpa1
P29452	Casp1	11713.7	11813.9	11651.9	13158.2	12340.9	12292.6	10956.3	10932.5	10545.9	11424.8	11239.6	10867.7	11726.5	12597.2	10811.6	11177.4	1.07425	0.127624	1.03383	0.226801	0.887287	0.0332168	0.921977	0.0138714	13	7	81.7949	Caspase-1 OS=Mus musculus GN=Casp1
Q91VI7	Rnh1	19753.8	19313.6	20072.5	19494	20588.9	21243.9	17693.4	17986.8	17760.6	17081.6	16461.7	17024.6	19713.3	20442.3	17813.6	16856	1.03698	0.347171	0.946241	0.0576899	0.824564	0.0226013	0.903634	0.0224745	11	6	83.9181	Ribonuclease inhibitor OS=Mus musculus GN=Rnh1
P11531	Dmd	2373.02	2536.27	2426.15	2206.64	2078.16	2068.34	2149.05	2238.08	1978.85	2139.55	1933.7	2094.89	2445.15	2117.71	2121.99	2056.04	0.866087	0.0223256	0.968922	0.614055	0.970881	0.5146	0.867838	0.0453591	26	1	123.429	Dystrophin OS=Mus musculus GN=Dmd
P04117	Fabp4	40439.2	39328.5	37448.6	43209.5	42605.3	40157.7	43151.2	40568.8	40918	45145.1	44425.4	45534.9	39072.1	41990.8	41546	45035.2	1.0747	0.126056	1.08398	0.0719414	1.0725	0.0944603	1.06332	0.0664318	14	11	106.946	Fatty acid-binding protein, adipocyte OS=Mus musculus GN=Fabp4
P62849	Rps24	7339.92	7872	6893.65	5209.94	4949.69	4245.4	3521.51	3121.52	2844.39	4758.7	4408.58	4646.95	7368.52	4801.68	3162.47	4604.75	0.651647	0.0125387	1.45606	0.0264441	0.958987	0.61719	0.429187	0.00464935	4	4	25.0121	40S ribosomal protein S24 OS=Mus musculus GN=Rps24
Q9D306	Mgat4c	3395.45	3045.98	3263.63	3827.97	3949.89	3605.33	4023.81	3639.26	3749.99	3801.37	3681.89	3785.43	3235.02	3794.39	3804.35	3756.23	1.17291	0.0375528	0.987351	0.772674	0.989942	0.777444	1.17599	0.00532916	10	3	63.8319	Alpha-1,3-mannosyl-glycoprotein 4-beta-N-acetylglucosaminyltransferase C OS=Mus musculus GN=Mgat4c
P09671	Sod2	5455.52	5785.72	5884.94	7271.27	7257.1	7557.02	6585.42	7025.87	7488.87	5739.27	5970.9	6003.72	5708.73	7361.8	7033.39	5904.63	1.28957	0.00578812	0.839514	0.0767466	0.802064	0.00289479	1.23204	0.00638841	6	3	39.2593	Superoxide dismutase [Mn], mitochondrial OS=Mus musculus GN=Sod2
Q9QWR8	Naga	5808.87	5394.93	5095.19	4932.49	5256.6	5280.5	5172	4939.79	4785.42	6108.11	5709.2	5618.2	5433	5156.53	4965.73	5811.84	0.949114	0.381828	1.17039	0.0375823	1.12708	0.0454266	0.913996	0.0287416	9	5	61.2153	Alpha-N-acetylgalactosaminidase OS=Mus musculus GN=Naga
Q9D1P2	Kat8	1478.44	1478.7	1559.83	1485.96	1734.44	1822.97	1542.27	1695.63	1559.62	1174.4	1100.64	1161.5	1505.66	1681.12	1599.17	1145.51	1.11654	0.275696	0.716317	0.0199158	0.681398	0.0456998	1.06211	0.278567	5	1	27.2071	Histone acetyltransferase KAT8 OS=Mus musculus GN=Kat8
Q64105	Spr	4180.94	4357.29	4026.37	2172.96	2386.45	2582.43	2593.66	2153.83	2317.15	3108.62	3419.45	3254.05	4188.2	2380.61	2354.88	3260.71	0.56841	0.00406968	1.38466	0.0246064	1.36969	0.0128481	0.562266	0.0130915	6	5	32.4952	Sepiapterin reductase OS=Mus musculus GN=Spr
P08752	Gnai2	19836.2	19136.9	20281.1	19304.4	19645	20688.4	24035.7	25318.4	25208.7	24920.2	24569.1	25919.3	19751.4	19879.2	24854.2	25136.2	1.00647	0.860429	1.01134	0.707861	1.26444	0.00431689	1.25835	0.0126602	22	6	179.157	Guanine nucleotide-binding protein G(i) subunit alpha-2 OS=Mus musculus GN=Gnai2
Q62433	Ndrg1	5118.92	5329.36	5675.52	5918.18	6472.15	6466.11	7402.42	6680.17	7306.43	6378.06	6115.04	6765.71	5374.6	6285.48	7129.67	6419.6	1.16948	0.0429816	0.900406	0.125505	1.02134	0.677172	1.32655	0.0232993	6	2	42.6493	Protein NDRG1 OS=Mus musculus GN=Ndrg1
P19467	Muc13	8305.21	8308.42	8641.7	9216.48	8753.57	9081.71	9770.27	10702.6	10930.4	8321.18	8033.6	7890.94	8418.44	9017.25	10467.8	8081.91	1.07113	0.055662	0.772075	0.0385695	0.896271	0.0171455	1.24343	0.0159405	12	6	71.0392	Mucin-13 OS=Mus musculus GN=Muc13
P61750	Arf4	10338.7	10414.2	11007.6	9300.78	8138.7	8739.33	9413.72	9060.16	8241.7	8639.26	8515.86	8826.92	10586.8	8726.27	8905.19	8660.68	0.824259	0.0321924	0.972542	0.630041	0.992484	0.880831	0.841159	0.098494	8	4	60.195	ADP-ribosylation factor 4 OS=Mus musculus GN=Arf4
Q06890	Clu	1010.21	995.548	1150.72	889.575	893.14	780.99	1313.61	1202.4	1266.02	1739.4	1603.92	1576.97	1052.16	854.568	1260.68	1640.1	0.812204	0.0657993	1.30097	0.022548	1.91921	0.00282351	1.19818	0.0637105	7	2	33.2053	Clusterin OS=Mus musculus GN=Clu
Q505F5	Lrrc47	727.978	701.615	633.38	678.286	678.795	720.568	727.175	772.923	709.41	585.984	636.859	609.828	687.658	692.55	736.503	610.89	1.00711	0.911455	0.829447	0.0269349	0.882089	0.0289681	1.07103	0.190325	4	1	19.0527	Leucine-rich repeat-containing protein 47 OS=Mus musculus GN=Lrrc47
Q9EQK5	Mvp	53390.6	52981.6	52465.9	58316.4	57735.9	59279.2	57478.8	57786.2	57638.8	59760.9	60310.9	59849.7	52946	58443.8	57634.6	59973.8	1.10384	0.00716273	1.04059	0.010059	1.02618	0.0860578	1.08855	0.00483892	33	17	228.419	Major vault protein OS=Mus musculus GN=Mvp
P25206	Mcm3	1464.05	1686.76	1606.6	2070.22	1925.85	2233.62	1210.93	1370.4	1163.43	1218.94	1149.21	1317.7	1585.8	2076.56	1248.25	1228.62	1.30947	0.0316831	0.98427	0.853494	0.591659	0.00950844	0.787142	0.0288003	1	1	4.4155	DNA replication licensing factor MCM3 OS=Mus musculus GN=Mcm3
P51660	Hsd17b4	9909.46	10043.9	9567.85	4608.19	5101.77	4360	3837.42	3738.84	3577.37	9535.48	9318.67	8799.08	9840.41	4689.99	3717.88	9217.74	0.476605	0.00232381	2.4793	0.00707956	1.96541	0.00164486	0.377817	0.00016476	13	5	83.1717	Peroxisomal multifunctional enzyme type 2 OS=Mus musculus GN=Hsd17b4
Q9QZ88	Vps29	4149.36	4484.97	4333.02	4516.12	4451.3	4483.75	3808.46	3895.77	4430.54	3733.59	3819.88	3847.85	4322.45	4483.72	4044.92	3800.44	1.03731	0.29418	0.939558	0.412829	0.847608	0.0026804	0.935794	0.291002	5	4	23.5341	Vacuolar protein sorting-associated protein 29 OS=Mus musculus GN=Vps29
P99029	Prdx5	36186.4	36022.4	35359.8	34112.9	32904	32979.9	34111.2	34240.9	32788	34200.2	33021	31747.1	35856.2	33332.3	33713.4	32989.4	0.929609	0.0234031	0.978526	0.525773	0.989714	0.731805	0.940237	0.0136233	8	7	50.6577	Peroxiredoxin-5, mitochondrial OS=Mus musculus GN=Prdx5
P16546	Sptan1	136259	137044	133708	134426	131669	129779	145243	143995	140408	127363	128913	125597	135670	131958	143215	127291	0.972637	0.140721	0.888809	0.0113696	0.964632	0.0763286	1.05561	0.00808605	125	54	843.141	Spectrin alpha chain, non-erythrocytic 1 OS=Mus musculus GN=Sptan1
Q6PIU9	Uncharacterized protein FLJ45252 homolog	2630.09	2625.41	2740.53	3413.25	3656.03	3694.97	4681.21	4720.61	5394.67	4711.15	4689.03	4499.09	2665.35	3588.08	4932.16	4633.09	1.3462	0.0137971	0.939362	0.401974	1.29124	0.00464791	1.85048	0.00271206	2	2	10.4614	Uncharacterized protein FLJ45252 homolog OS=Mus musculus
Q9Z2I9	Sucla2	36963.9	36937.6	38197.9	34445.6	35030.2	36276	34963.9	35597.6	35116.3	37882.3	38832.6	37052.1	37366.5	35250.6	35225.9	37922.3	0.943375	0.0687154	1.07655	0.0550322	1.07579	0.038537	0.942715	0.0501695	29	14	165.597	Succinyl-CoA ligase [ADP-forming] subunit beta, mitochondrial OS=Mus musculus GN=Sucla2
Q9DD20	Mettl7b	12739.1	12990.8	12779.6	14774.1	14004.5	14346.8	16344.3	16361.3	17438.6	16131.5	16078.5	16246.9	12836.5	14375.1	16714.7	16152.3	1.11986	0.0304179	0.966352	0.332583	1.12363	0.0236346	1.30212	0.00834498	12	8	70.7946	Methyltransferase-like protein 7B OS=Mus musculus GN=Mettl7b
P42227	Stat3	4756.63	4667.85	4539.8	5575.61	5291.22	5598.79	5438.78	5446.24	5438.96	4789.05	4515.08	4430.11	4654.76	5488.54	5441.33	4578.08	1.17912	0.0141103	0.841354	0.0421947	0.834116	0.0101216	1.16898	0.00739654	8	2	33.6881	Signal transducer and activator of transcription 3 OS=Mus musculus GN=Stat3
Q9DCS9	Ndufb10	2134.96	2135.96	2147.89	2078.29	1676.47	1730.63	2774.04	2852.44	2689.69	3008.05	2758.03	2790.06	2139.6	1828.46	2772.06	2852.05	0.854582	0.179542	1.02886	0.520907	1.5598	0.0115911	1.2956	0.00514958	4	3	17.2703	NADH dehydrogenase [ubiquinone] 1 beta subcomplex subunit 10 OS=Mus musculus GN=Ndufb10
P26443	Glud1	38739.8	38258.7	39924.8	35959.8	35006.7	36288.1	43090.6	44185.1	43891.5	35633	35009.8	35961.1	38974.4	35751.5	43722.4	35534.6	0.917308	0.022735	0.812733	0.00327872	0.993933	0.709042	1.12182	0.0162932	30	11	203.519	Glutamate dehydrogenase 1, mitochondrial OS=Mus musculus GN=Glud1
Q99L45	Eif2s2	5848.31	5377.42	5703.98	8627.69	8360.29	7907.74	5014.9	5011.35	4888.08	5363.26	5608.66	5270.59	5643.24	8298.58	4971.44	5414.17	1.47053	0.00625051	1.08905	0.0694708	0.652421	0.00578793	0.880956	0.045408	10	4	65.4084	Eukaryotic translation initiation factor 2 subunit 2 OS=Mus musculus GN=Eif2s2
P61358	Rpl27	2075.61	2194.57	2173.08	2069.44	2068.56	2045.18	1213.93	1165.75	1059.63	910.483	1133.66	1039.9	2147.75	2061.06	1146.44	1028.02	0.959634	0.183563	0.896705	0.288125	0.498781	0.0101197	0.533784	0.00689814	2	1	18.6254	60S ribosomal protein L27 OS=Mus musculus GN=Rpl27
O70318	Epb41l2	24626	24752.4	25933	28732.7	29241	31033.5	30051.1	29703.5	30504.1	30778.5	30650.5	31842.9	25103.8	29669.1	30086.2	31090.6	1.18186	0.0235103	1.03338	0.155146	1.04791	0.204274	1.19847	0.00341665	9	1	52.5096	Band 4.1-like protein 2 OS=Mus musculus GN=Epb41l2
P28271	Aco1	6275.24	6011.96	5847.52	6062.84	6106.91	6346.47	7382.77	7349.94	6659.19	6759.14	6667.98	6236.89	6044.91	6172.07	7130.63	6554.67	1.02104	0.51587	0.919226	0.184523	1.06199	0.158769	1.17961	0.015191	20	3	119.99	Cytoplasmic aconitate hydratase OS=Mus musculus GN=Aco1
Q9EQH2	Erap1	7461.84	7039.42	7188.33	7308.22	6965.55	6723.44	6804.16	5308.81	6310.26	6697.17	6435.06	6542.66	7229.86	6999.07	6141.08	6558.3	0.968078	0.39797	1.06794	0.522425	0.937024	0.135117	0.849405	0.101169	11	4	63.4585	Endoplasmic reticulum aminopeptidase 1 OS=Mus musculus GN=Erap1
Q8BJ64	Chdh	6002.52	5741.05	6000.47	4399.86	4757.4	4394.76	5429.33	5601.84	5387.13	6026.18	6453.96	6270.43	5914.68	4517.34	5472.77	6250.19	0.76375	0.006857	1.14205	0.0347401	1.3836	0.00329757	0.925285	0.100225	11	4	75.4502	Choline dehydrogenase, mitochondrial OS=Mus musculus GN=Chdh
Q8BZF8	Pgm5	10590.1	10236.7	9915.55	10918	10575.1	11557	10200.2	11583.5	11060.1	9745.53	9450.06	9723.79	10247.4	11016.7	10947.9	9639.79	1.07507	0.144157	0.880512	0.125902	0.875014	0.0483757	1.06836	0.333367	14	5	90.3173	Phosphoglucomutase-like protein 5 OS=Mus musculus GN=Pgm5
P45591	Cfl2	1525.45	1417.49	1596.35	1945.69	1629.1	1859.1	1724.87	1569.47	1555.79	1713.44	1301.8	1318.13	1513.09	1811.3	1616.71	1444.46	1.19708	0.104074	0.893454	0.40852	0.797471	0.126187	1.06848	0.289325	18	2	134.138	Cofilin-2 OS=Mus musculus GN=Cfl2
Q9R069	Bcam	1419.49	1443.09	1404.45	1422.66	1525.15	1607.44	2412.26	2357.07	2600.06	1468.96	1463.99	1632.78	1422.34	1518.42	2456.46	1521.91	1.06755	0.265412	0.619553	0.00844209	1.0023	0.969045	1.72706	0.00455867	5	2	24.9016	Basal cell adhesion molecule OS=Mus musculus GN=Bcam
Q91WK2	Eif3h	1521.64	1834.36	1767.51	1738.95	1684.99	1568.37	2404.67	2326.66	2480.66	2648.91	2634.86	2583.38	1707.84	1664.11	2404	2622.38	0.974394	0.759915	1.09084	0.0561971	1.57585	0.00441987	1.40763	0.0323285	6	3	26.7409	Eukaryotic translation initiation factor 3 subunit H OS=Mus musculus GN=Eif3h
Q9Z2H7	Gipc2	402.64	352.166	312.742	219.272	181.159	79.1992	172.629	114.573	45.3135	261.683	213.832	285.463	355.849	159.877	110.838	253.659	0.449283	0.0459774	2.28855	0.0775346	1.58659	0.174641	0.311476	0.0573113	3	1	22.5013	PDZ domain-containing protein GIPC2 OS=Mus musculus GN=Gipc2
Q9JLJ2	Aldh9a1	3014.9	2931.46	3146.82	2992.79	2845.46	3241.86	2490.66	2712.82	2852.46	2245.21	2283.4	2296.4	3031.06	3026.7	2685.32	2275	0.998563	0.982525	0.847201	0.100941	0.751644	0.0362072	0.885934	0.0727326	14	3	72.5842	4-trimethylaminobutyraldehyde dehydrogenase OS=Mus musculus GN=Aldh9a1
Q8CIB5	Fermt2	775.576	708.388	714.739	616.21	463.784	551.306	753.524	543.108	714.9	631.964	651.343	643.762	732.901	543.767	670.511	642.356	0.741938	0.060646	0.958011	0.758883	1.18131	0.188437	0.914872	0.364193	5	2	24.0154	Fermitin family homolog 2 OS=Mus musculus GN=Fermt2
B2RXS4	Plxnb2	1472.81	1458.08	1578.63	2161	2109.78	2457.47	2809.09	2879.36	2659.76	2070.63	2278.23	2283.31	1503.17	2242.75	2782.74	2210.73	1.49201	0.03081	0.794442	0.0192323	0.98572	0.838417	1.85124	0.0060649	13	2	61.3207	Plexin-B2 OS=Mus musculus GN=Plxnb2
P62821	Rab1A	15447.2	16281	15991.6	12821.3	13267.7	13300	19235.3	19947.3	18764.3	23845.9	24259.2	23161.6	15906.6	13129.6	19315.6	23755.6	0.825421	0.00780992	1.22987	0.00842983	1.80931	0.00153346	1.21431	0.00824374	24	5	145.766	Ras-related protein Rab-1A OS=Mus musculus GN=Rab1A
Q8CAQ8	Immt	55048.9	53113.5	54469.9	52838.7	54423.3	55187.2	64467.3	63394.2	65226.9	59955.9	59796.9	59085.6	54210.7	54149.7	64362.8	59612.8	0.998874	0.961958	0.926199	0.0200062	1.10089	0.0183301	1.18727	0.00163291	38	19	291.38	Mitochondrial inner membrane protein OS=Mus musculus GN=Immt
Q62186	Ssr4	1446.03	1620.53	1416.88	1211.49	1140.71	1030.56	1474.52	1425.42	1259.88	1441.24	1389.57	1458.46	1494.48	1127.59	1386.61	1429.76	0.754501	0.0296433	1.03112	0.650038	1.26798	0.0321162	0.927817	0.253748	3	1	23.5649	Translocon-associated protein subunit delta OS=Mus musculus GN=Ssr4
Q8VDM4	Psmd2	5053.39	5144.41	5570.93	5948.08	5934.33	5793.73	5904.33	5292.67	5540.54	6343.61	7072.61	6935.6	5256.24	5892.05	5579.18	6783.94	1.12096	0.0790256	1.21594	0.0414812	1.15137	0.074122	1.06144	0.348696	11	5	51.1036	26S proteasome non-ATPase regulatory subunit 2 OS=Mus musculus GN=Psmd2
Q9R1T2	Sae1	444.26	505.597	496.829	436.294	373.445	443.284	416.913	341.039	485.125	313.972	376.13	374.063	482.229	417.674	414.359	354.722	0.866133	0.13654	0.856073	0.366725	0.849278	0.135117	0.859258	0.304784	3	1	16.1312	SUMO-activating enzyme subunit 1 OS=Mus musculus GN=Sae1
Q9CX34	Sugt1	2833.56	3007.62	2849.25	2834.6	2873.06	2859.09	2346.1	2532.72	2193.68	2395.31	2319.38	2328.11	2896.81	2855.58	2357.5	2347.6	0.985768	0.59697	0.9958	0.947667	0.822109	0.00295887	0.813827	0.0171243	11	3	62.8526	Suppressor of G2 allele of SKP1 homolog OS=Mus musculus GN=Sugt1
Q61029	Tmpo	318.848	342.948	349.295	403.526	490.869	487.432	796.894	614.372	723.167	522.361	462.754	486.747	337.03	460.609	711.478	490.62	1.36667	0.0685279	0.68958	0.0808619	1.06516	0.47235	2.11102	0.0164521	9	1	70.1221	Lamina-associated polypeptide 2, isoforms beta/delta/epsilon/gamma OS=Mus musculus GN=Tmpo
Q9QZS0	Col4a3	1158.3	1391.12	1447.56	1644.19	1576.13	1586.2	574.081	580.683	658.531	513.304	615.97	739.282	1332.32	1602.17	604.432	622.852	1.20254	0.127267	1.03047	0.849736	0.388755	0.00769449	0.453667	0.00393679	8	1	21.1318	Collagen alpha-3(IV) chain OS=Mus musculus GN=Col4a3
O70570	Pigr	7783.36	7705.06	7463.72	8789.88	8420.09	8565.11	8933.52	8470.77	8921.3	7188.42	6982.28	7373.53	7650.71	8591.69	8775.2	7181.41	1.12299	0.0120178	0.818376	0.0113696	0.835855	0.00434117	1.14698	0.0297015	21	7	131.313	Polymeric immunoglobulin receptor OS=Mus musculus GN=Pigr
Q61941	Nnt	23722.8	24082.6	24605.1	23500.8	24422.6	23855.5	23294.5	23305.6	22656.8	23309.2	23135.3	23825.1	24136.9	23926.3	23085.6	23423.2	0.991276	0.655695	1.01462	0.398088	0.978974	0.256947	0.956447	0.149417	16	6	93.9202	NAD(P) transhydrogenase, mitochondrial OS=Mus musculus GN=Nnt
P00920	Ca2	85842.1	81885.1	81905.7	70044.8	70142.4	70848.9	75174.3	76507.4	77438.7	91845.5	92738.1	90516.4	83211	70345.4	76373.5	91700	0.845386	0.0230996	1.20068	0.00339339	1.30357	0.00204479	0.917829	0.0694624	24	17	136.246	Carbonic anhydrase 2 OS=Mus musculus GN=Ca2
Q91WU5	As3mt	937.078	1005.57	994.388	637.525	620.805	822.766	1521.13	1781.56	1759.73	1528.26	1690.85	1599.49	979.013	693.699	1687.48	1606.2	0.70857	0.0665956	0.951837	0.532366	2.31542	0.00329039	1.72365	0.0028415	5	1	21.4274	Arsenite methyltransferase OS=Mus musculus GN=As3mt
Q60829	Ppp1r1b	3291.52	3247.65	3284.49	1563.82	1759.56	1975.07	3689.15	3898.5	3602.62	4245.83	4712.83	4631.39	3274.56	1766.15	3730.09	4530.02	0.539356	0.0183862	1.21445	0.0397723	2.56491	0.00178451	1.13911	0.0412504	3	1	30.0698	Protein phosphatase 1 regulatory subunit 1B OS=Mus musculus GN=Ppp1r1b
Q61937	Npm1	47462.1	47989.8	51302.6	51885.9	51201.5	52538	95746.9	98964.4	100474	77080.6	75477.6	75688.7	48918.2	51875.1	98395.2	76082.3	1.06045	0.169713	0.773232	0.0114312	1.46664	0.000373249	2.01142	0.000456985	18	12	114.763	Nucleophosmin OS=Mus musculus GN=Npm1
Q60597	Ogdh	16287.7	16116.5	16706.2	16616.1	14601.1	15215.4	19032.7	18705.7	18253.3	17351.9	17800	18578	16370.2	15477.6	18663.9	17910	0.945473	0.329309	0.959607	0.228553	1.15716	0.0525493	1.14011	0.025527	25	10	153.124	2-oxoglutarate dehydrogenase, mitochondrial OS=Mus musculus GN=Ogdh
Q9D279	Misp	12461.5	12538.4	12208.6	12464.5	12519.6	11881.6	10849.8	9747.65	10289.1	11105.8	10401	11357	12402.8	12288.6	10295.5	10954.6	0.990787	0.706257	1.06402	0.270474	0.891447	0.0383804	0.830095	0.0308925	17	7	98.2522	Mitotic interactor and substrate of PLK1 OS=Mus musculus GN=Misp
P16858	Gapdh	114919	112779	114889	109067	111527	113767	105693	108010	106807	102670	102988	103669	114196	111454	106837	103109	0.97599	0.221768	0.965109	0.0463978	0.925129	0.0362536	0.935559	0.0314813	30	20	174.093	Glyceraldehyde-3-phosphate dehydrogenase OS=Mus musculus GN=Gapdh
Q9D154	Serpinb1a	51120.9	50051.3	48096.8	30928.7	30568.8	30446.7	50744.3	49948.4	47522.4	52698.6	52572.3	50253	49756.4	30648.1	49405.1	51841.3	0.615963	0.00872698	1.04931	0.1877	1.6915	0.00483639	0.99294	0.130706	31	17	228.576	Leukocyte elastase inhibitor A OS=Mus musculus GN=Serpinb1a
P12382	Pfkl	1033.27	1025.79	1159.17	673.578	580.383	722.039	305.901	187.782	111.012	627.138	568.068	625.232	1072.75	658.667	201.565	606.812	0.614001	0.0104968	3.01051	0.0361116	0.921274	0.389124	0.187896	0.0330528	6	1	34.0434	6-phosphofructokinase, liver type OS=Mus musculus GN=Pfkl
Q8BH95	Echs1	23477.8	23293	22830.4	22270.7	23294.3	24345.1	24687.8	24672.6	24781.6	23206.5	23253.8	22973.2	23200.4	23303.3	24714	23144.5	1.00444	0.908216	0.936493	0.00931116	0.993183	0.837483	1.06524	0.0222736	13	8	73.3383	Enoyl-CoA hydratase, mitochondrial OS=Mus musculus GN=Echs1
Q6NVF9	Cpsf6	494.408	544.372	655.01	675.2	547.215	647.6	2248.19	2333.95	2286.38	2250.28	2261.72	2368.36	564.596	623.338	2289.5	2293.45	1.10404	0.454388	1.00172	0.950602	3.67931	0.000404808	4.05512	0.00323141	4	1	15.9962	Cleavage and polyadenylation specificity factor subunit 6 OS=Mus musculus GN=Cpsf6
P46935	Nedd4	2184.9	1852.27	1564.27	1566.92	1525.35	1483.24	1275.32	1458.2	1329.16	2210.19	2027.9	2125.09	1867.14	1525.17	1354.23	2121.06	0.816846	0.24906	1.56625	0.00692918	1.39071	0.00859055	0.725293	0.111664	5	4	24.0657	E3 ubiquitin-protein ligase NEDD4 OS=Mus musculus GN=Nedd4
P68372	Tubb4b	30254.7	29591.1	29262.8	32434	32651.3	33194.5	34703.1	33779.3	34398.4	28886.9	30650.5	31115.2	29702.9	32759.9	34293.6	30217.6	1.10292	0.00801452	0.881143	0.0433709	0.922394	0.0749227	1.15455	0.00396643	25	3	174.644	Tubulin beta-4B chain OS=Mus musculus GN=Tubb4b
Q62393	Tpd52	23867.4	24971.6	23522.1	23600.7	23549.2	21706.6	25167.1	25230.2	22282.6	27277.2	26552.5	25950.7	24120.4	22952.2	24226.6	26593.4	0.951567	0.262715	1.09769	0.182841	1.15865	0.0236144	1.0044	0.930622	9	7	69.1326	Tumor protein D52 OS=Mus musculus GN=Tpd52
Q9CZ13	Uqcrc1	36951.5	36759.2	37272.4	30173.8	29445.8	30607.1	36508.6	35893.6	35249.8	39053.5	38790	40615.7	36994.4	30075.6	35884	39486.4	0.812977	0.00491945	1.10039	0.0312004	1.31291	0.00304982	0.969986	0.144276	24	16	133.893	Cytochrome b-c1 complex subunit 1, mitochondrial OS=Mus musculus GN=Uqcrc1
P63242	Eif5a	22440.1	22160.1	21627.5	24120.1	25053.5	25103.3	29396.9	29532.5	29941.7	24547.6	26083.1	25130.3	22075.9	24758.9	29623.7	25253.7	1.12154	0.0132287	0.852482	0.0224944	1.01998	0.466779	1.3419	0.00306585	13	9	62.009	Eukaryotic translation initiation factor 5A-1 OS=Mus musculus GN=Eif5a
Q8K3J1	Ndufs8	145.228	126.062	138.217	97.8779	84.4205	107.459	570.869	462.122	532.744	538.56	630.624	562.707	136.502	96.586	521.912	577.297	0.707578	0.0274988	1.10612	0.333535	5.97703	0.00756249	3.82347	0.000240809	2	1	12.2344	NADH dehydrogenase [ubiquinone] iron-sulfur protein 8, mitochondrial OS=Mus musculus GN=Ndufs8
P70460	Vasp	3191.29	2965.85	3116.69	3504.84	3406.19	3416.01	2036.96	1852.85	2043.37	1524.2	1396.14	1469.16	3091.28	3442.35	1977.73	1463.17	1.11357	0.040481	0.739822	0.0200348	0.425049	0.00028337	0.639777	0.000973161	12	3	63.0003	Vasodilator-stimulated phosphoprotein OS=Mus musculus GN=Vasp
O55131	Sept7	9875.61	10343	10526	11116.2	11388.8	11836.3	11348.5	11614.8	11438.1	12884.9	13232.3	12291.6	10248.2	11447.1	11467.1	12802.9	1.11699	0.032003	1.11649	0.0669819	1.11844	0.0337367	1.11894	0.0201006	18	7	119.909	Septin-7 OS=Mus musculus GN=Sept7
Q9QYG0	Ndrg2	2230.45	1993.83	2013.39	2280.54	2137.99	2051.58	2029.75	1876.26	2015.8	1619.71	1705.18	1754.22	2079.22	2156.7	1973.94	1693.03	1.03727	0.545183	0.857693	0.036551	0.78501	0.0170606	0.949365	0.208155	3	2	15.7506	Protein NDRG2 OS=Mus musculus GN=Ndrg2
B2RX12	Abcc3	5382.55	5318.43	5755.6	5247.65	5595.86	5823.99	5382.41	5445.49	6005.35	4791.37	5262.64	4605.83	5485.53	5555.84	5611.08	4886.61	1.01282	0.806291	0.870886	0.104694	0.879546	0.0854128	1.02289	0.215184	12	4	59.1029	Canalicular multispecific organic anion transporter 2 OS=Mus musculus GN=Abcc3
Q501J6	Ddx17	12138.2	10641.7	10857.9	12851.4	12494.1	12152.7	13367.3	14515.7	13324.8	10952	10828.5	10998	11212.6	12499.4	13735.9	10926.2	1.11476	0.13654	0.795444	0.0456585	0.874135	0.0236144	1.22504	0.080841	24	9	156.633	Probable ATP-dependent RNA helicase DDX17 OS=Mus musculus GN=Ddx17
O35643	Ap1b1	19646.6	19816.1	20161.3	24489.3	25008.3	25600.7	36865.5	37247.3	37284.2	36546.5	36160.2	37766.6	19874.7	25032.8	37132.3	36824.4	1.25953	0.00625051	0.991709	0.661512	1.47105	0.00148333	1.86832	6.82276e-05	18	7	104.785	AP-1 complex subunit beta-1 OS=Mus musculus GN=Ap1b1
P48962	Slc25a4	3315	3720.28	4296.73	2972.11	3115.04	3378.96	4786.47	4741.69	4685.16	6241.79	5753.54	6029.19	3777.34	3155.37	4737.77	6008.17	0.835342	0.197772	1.26814	0.0321968	1.90411	0.00163965	1.25426	0.103711	30	2	148.404	ADP/ATP translocase 1 OS=Mus musculus GN=Slc25a4
Q3V036	Ccdc27	717.02	582.35	847.307	644.546	615.391	737.163	1035.33	974.154	972.91	999.895	877.545	1012.41	715.559	665.7	994.131	963.285	0.930322	0.655441	0.968971	0.635103	1.44702	0.015734	1.38931	0.0898987	2	1	15.3227	Coiled-coil domain-containing protein 27 OS=Mus musculus GN=Ccdc27
Q921U8	Smtn	554.649	581.214	676.264	389.281	390.411	407.582	475.146	195.718	513.674	549.379	560.614	566.12	604.042	395.758	394.846	558.704	0.655183	0.0524586	1.41499	0.316659	1.41173	0.000875601	0.653673	0.226559	4	1	22.026	Smoothelin OS=Mus musculus GN=Smtn
Q9CQE8	UPF0568 protein C14orf166 homolog	41751	43987.5	47181.6	54782.1	58392.8	62094.1	92384.4	94402.5	95115	83171.3	83021.3	90126.5	44306.7	58423	93967.3	85439.7	1.3186	0.0216282	0.90925	0.098155	1.46243	0.00497574	2.12084	0.00132284	11	9	48.0526	UPF0568 protein C14orf166 homolog OS=Mus musculus
Q04857	Col6a1	25988.1	24298.7	24029.9	23183.3	23282.7	22578.5	26688.3	26404.9	25292.5	34828.2	34029.4	33382.3	24772.2	23014.9	26128.6	34080	0.929058	0.131288	1.30432	0.0045547	1.48078	0.00178451	1.05475	0.0818377	27	10	195.281	Collagen alpha-1(VI) chain OS=Mus musculus GN=Col6a1
Q64133	Maoa	113025	111784	111437	109280	109791	110768	111975	111893	111801	120427	116855	114458	112082	109946	111889	117247	0.980945	0.0576771	1.04788	0.143717	1.0664	0.0658385	0.998282	0.703555	39	23	241.941	Amine oxidase [flavin-containing] A OS=Mus musculus GN=Maoa
Q60952	Cep250	11489.2	11357.7	11040.6	12159.2	12365.5	12370.2	16054.2	16198.6	15910.8	13766.7	13738	13947	11295.9	12298.3	16054.5	13817.2	1.08874	0.0205889	0.860644	0.00327872	1.12351	0.00144426	1.42127	0.000663926	17	3	57.926	Centrosome-associated protein CEP250 OS=Mus musculus GN=Cep250
P19253	Rpl13a	780.227	595.725	644.627	705.981	749.77	863.724	310.399	352.98	391.19	443.822	487.063	428.049	673.527	773.158	351.523	452.978	1.14793	0.301296	1.28862	0.0623903	0.58588	0.0239419	0.521914	0.0418516	6	1	40.0015	60S ribosomal protein L13a OS=Mus musculus GN=Rpl13a
Q02053	Uba1	47520.7	47950.8	48228.7	47587.9	47828.6	46927.4	46387.9	47419.4	46930.8	41954.7	41021.3	41174.4	47900.1	47448	46912.7	41383.5	0.990562	0.31632	0.882138	0.0045547	0.872186	0.00153346	0.979387	0.0517609	32	19	210.184	Ubiquitin-like modifier-activating enzyme 1 OS=Mus musculus GN=Uba1
Q99KV1	Dnajb11	5339.6	5525.94	4767.62	4104.14	4295.31	3660.71	5098.18	4482.41	3971.4	5362.98	5244	4956.99	5211.05	4020.05	4517.33	5187.99	0.771448	0.0365582	1.14846	0.230875	1.29053	0.02059	0.866875	0.101599	6	3	47.1071	DnaJ homolog subfamily B member 11 OS=Mus musculus GN=Dnajb11
Q8BK67	Rcc2	5523.97	4521.6	5461.37	4052.2	3770.34	2879.38	11915.1	11338.2	9497.08	8062.29	9498.47	10169.4	5168.98	3567.31	10916.8	9243.4	0.690137	0.0551655	0.846712	0.22334	2.59114	0.0100259	2.11199	0.0196192	4	1	20.7898	Protein RCC2 OS=Mus musculus GN=Rcc2
Q06185	Atp5i	13117.6	12859.9	13136.4	10572.7	11174.6	11653.5	10051.9	10121.7	9857.39	10618.4	10448.3	10509.2	13037.9	11133.6	10010.3	10525.3	0.85394	0.040481	1.05145	0.0295085	0.945364	0.225583	0.767783	0.00272164	2	1	15.6249	ATP synthase subunit e, mitochondrial OS=Mus musculus GN=Atp5i
P32648	Vip	5826.51	5956.47	5767.42	5246.12	5351.16	5805.69	5924.5	5645.35	5602.73	4487.16	4581.44	4419.86	5850.13	5467.66	5724.19	4496.16	0.934621	0.195218	0.785465	0.0131719	0.822318	0.0388195	0.978472	0.397714	2	2	12.8407	VIP peptides OS=Mus musculus GN=Vip
P47856	Gfpt1	60169.1	63265.1	66170.8	58317.5	56028.6	56449.9	59739	61744.4	59491	59384.8	59649.1	60917.1	63201.7	56932	60324.8	59983.7	0.900798	0.086708	0.994346	0.765407	1.0536	0.0454266	0.95448	0.272114	41	20	310.384	Glutamine--fructose-6-phosphate aminotransferase [isomerizing] 1 OS=Mus musculus GN=Gfpt1
P28653	Bgn	3374.59	3462.32	2862.15	1379.76	1407.08	1040.75	1154.42	1123.04	1033.18	4184.87	4335.97	3715.8	3233.02	1275.86	1103.55	4078.88	0.394635	0.00934692	3.69616	0.0165444	3.19696	0.00335885	0.341336	0.000827996	8	3	42.1021	Biglycan OS=Mus musculus GN=Bgn
Q9DCF9	Ssr3	2479.66	2096.54	1871.36	1065.27	1065.78	873.421	1440	1394.76	934.6	1379.24	1219.44	1249.35	2149.19	1001.49	1256.45	1282.68	0.465985	0.0331266	1.02087	0.915173	1.28077	0.0450094	0.584617	0.0220468	1	1	14.8334	Translocon-associated protein subunit gamma OS=Mus musculus GN=Ssr3
Q9QUH0	Glrx	11621.2	11099.6	10341.3	11008	10803.1	10356.6	8934.26	8420.53	7674.77	9163.56	8949.82	8446.82	11020.7	10722.6	8343.19	8853.4	0.972949	0.586569	1.06115	0.386648	0.825678	0.00928066	0.757046	0.00135463	3	3	15.7629	Glutaredoxin-1 OS=Mus musculus GN=Glrx
P16332	Mut	8763.33	9155.32	9310.24	9027.78	8803.13	8269.23	7925.79	7689.98	6775.41	8935.58	8398.85	8951.54	9076.29	8700.05	7463.73	8761.99	0.958547	0.311356	1.17394	0.0860317	1.00712	0.857999	0.822332	0.0903867	19	4	105.896	Methylmalonyl-CoA mutase, mitochondrial OS=Mus musculus GN=Mut
Q00PI9	Hnrnpul2	15314	16192.2	16889	15492	14705.1	15871.1	19109.1	18186.4	18566.1	16680.4	17330.1	17924.1	16131.7	15356.1	18620.5	17311.5	0.951916	0.308308	0.9297	0.0874336	1.12734	0.0304573	1.15428	0.0665733	16	8	109.607	Heterogeneous nuclear ribonucleoprotein U-like protein 2 OS=Mus musculus GN=Hnrnpul2
Q9Z1F9	Uba2	2491.82	2633.28	2366.01	2535.21	2537.08	2865.56	3207.01	3073.73	2879.64	2692.62	2543.4	2817.84	2497.03	2645.95	3053.46	2684.62	1.05964	0.395554	0.879206	0.0811025	1.01461	0.812961	1.22283	0.0192121	9	2	40.1682	SUMO-activating enzyme subunit 2 OS=Mus musculus GN=Uba2
P55264	Adk	51475.2	49841	50835.1	46145.7	45096.7	45286.8	61656.1	58764.6	61453.7	54945	55272.4	53504.7	50717.1	45509.7	60624.8	54574	0.897326	0.00786291	0.900193	0.0311765	1.19917	0.00301328	1.19535	0.00167123	24	19	145.365	Adenosine kinase OS=Mus musculus GN=Adk
P14094	Atp1b1	105540	104476	106336	107201	103967	104295	133002	136219	137915	115745	115146	114121	105450	105154	135712	115004	0.99719	0.854878	0.847413	0.0144953	1.09367	0.0111123	1.28697	0.00175376	18	10	85.8482	Sodium/potassium-transporting ATPase subunit beta-1 OS=Mus musculus GN=Atp1b1
Q9DB25	Alg5	2228.98	2035.86	2175.8	1965.33	1908.41	1704.64	2330.36	2386.63	2199.09	2154.27	2166.36	1917.99	2146.88	1859.46	2305.36	2079.54	0.866121	0.0793666	0.902046	0.144449	1.11836	0.157075	1.07382	0.252748	2	2	11.3856	Dolichyl-phosphate beta-glucosyltransferase OS=Mus musculus GN=Alg5
Q6A0A9	FAM120A	2606.72	2718.81	2816.21	2661.57	2848.71	2664.39	2719.63	2720.81	2671.49	2451.52	2473.71	2383.56	2713.92	2724.89	2703.98	2436.26	1.00405	0.928403	0.900993	0.014787	0.894077	0.0452488	0.996338	0.917953	6	2	33.8966	Constitutive coactivator of PPAR-gamma-like protein 1 OS=Mus musculus GN=FAM120A
Q8JZQ2	Afg3l2	11396	11362.7	11578.3	10074.6	10029.3	9938.44	9817.29	9283.35	9517.09	12083	11633.3	11696.4	11445.7	10014.1	9539.24	11804.2	0.874926	0.0030483	1.23744	0.00622043	1.17876	0.0103629	0.833436	0.00832045	20	6	104.431	AFG3-like protein 2 OS=Mus musculus GN=Afg3l2
Q8R088	Golph3l	5809.81	6469.23	6383.72	7167.89	7120.29	7068.65	8549.75	8413.51	8288.83	7530.76	7471.01	7825.85	6220.92	7118.94	8417.36	7609.21	1.14436	0.0786572	0.903989	0.0227003	1.06887	0.0588309	1.35307	0.0181658	10	4	61.4888	Golgi phosphoprotein 3-like OS=Mus musculus GN=Golph3l
P70695	Fbp2	22189.2	22512.6	22657.4	21398.9	21512.7	21816.6	24098.7	24858.9	24724.1	27014.5	26490.4	25646.5	22453.1	21576.1	24560.6	26383.8	0.96094	0.0245979	1.07423	0.0576899	1.22283	0.0106426	1.09386	0.00301389	8	4	59.3435	Fructose-1,6-bisphosphatase isozyme 2 OS=Mus musculus GN=Fbp2
Q9CZS1	Aldh1b1	162463	165571	161812	122889	122182	120212	152339	148403	138694	155894	159870	148607	163282	121761	146479	154790	0.745708	0.000962008	1.05674	0.259227	1.27127	0.0165387	0.897091	0.0519218	56	27	249.688	Aldehyde dehydrogenase X, mitochondrial OS=Mus musculus GN=Aldh1b1
P38060	Hmgcl	11739.7	12756.8	12562.2	13629.1	12965.7	13218.7	13884.1	13896.3	14446.4	13437	13252.6	14004.3	12352.9	13271.1	14075.6	13564.7	1.07433	0.119383	0.963699	0.223523	1.02212	0.423555	1.13946	0.0322842	11	5	76.4013	Hydroxymethylglutaryl-CoA lyase, mitochondrial OS=Mus musculus GN=Hmgcl
P35278	Rab5c	528.101	396.501	349	353.326	341.074	314.08	281.171	179.119	174.48	295.562	182.447	174.923	424.534	336.16	211.59	217.644	0.791832	0.296019	1.02861	0.934608	0.647442	0.10969	0.498405	0.00456315	6	1	27.6562	Ras-related protein Rab-5C OS=Mus musculus GN=Rab5c
Q921G7	Etfdh	29070.4	28990.7	28740.7	35255.8	35828.1	34620.6	31992.1	31265.7	32307.5	29665.6	29893.8	30710.6	28934	35234.8	31855.1	30090	1.21777	0.00849829	0.944589	0.043582	0.853983	0.0029426	1.10096	0.0151466	20	11	149.043	Electron transfer flavoprotein-ubiquinone oxidoreductase, mitochondrial OS=Mus musculus GN=Etfdh
Q9EQH3	Vps35	13229	12862.9	12682.2	16162.9	15272.4	13754.7	10640.8	10472.3	10324.9	10189.6	10481.5	10096.1	12924.7	15063.4	10479.3	10255.7	1.16547	0.127682	0.978665	0.279633	0.680841	0.0324893	0.8108	0.000369526	16	8	99.9922	Vacuolar protein sorting-associated protein 35 OS=Mus musculus GN=Vps35
Q8BH04	Pck2	287.063	390.938	374.368	431.139	492.304	510.993	954.387	966.383	735.133	806.518	1098.84	815.787	350.79	478.145	885.301	907.048	1.36305	0.0673158	1.02456	0.899052	1.89701	0.0593461	2.52374	0.0259765	3	1	14.9001	Phosphoenolpyruvate carboxykinase [GTP], mitochondrial OS=Mus musculus GN=Pck2
Q99KE1	Me2	1699.76	1458.7	1367.42	766.338	701.566	600.071	1591.19	1481.4	2067.74	1338.87	1469.07	1267.38	1508.63	689.325	1713.44	1358.44	0.456922	0.0184001	0.792812	0.247672	1.97068	0.00506646	1.13576	0.499918	4	2	25.7556	NAD-dependent malic enzyme, mitochondrial OS=Mus musculus GN=Me2
P97313	Prkdc	4410.58	4224.7	4014.09	3862.5	3524.84	3607.45	3387.13	3271.07	3450.6	3358.43	3360.37	3298.31	4216.46	3664.93	3369.6	3339.04	0.869197	0.0461722	0.990929	0.690583	0.911078	0.105957	0.799155	0.0253321	7	2	34.5295	DNA-dependent protein kinase catalytic subunit OS=Mus musculus GN=Prkdc
Q99020	Hnrnpab	5648.63	4930.91	5397.64	4286.45	4324.39	4034.2	6593.52	6713.54	6010.49	5215.08	5127.01	5183.17	5325.73	4215.01	6439.18	5175.09	0.791443	0.0426876	0.803687	0.0600134	1.22778	0.0140984	1.20907	0.0884948	8	4	48.4878	Heterogeneous nuclear ribonucleoprotein A/B OS=Mus musculus GN=Hnrnpab
Q6ZQI3	Mlec	5494.79	5299.94	5179.36	5910.52	5371.46	5416.12	6608.62	6903.52	6003.03	6068.51	6133.47	5846.48	5324.7	5566.03	6505.05	6016.15	1.04532	0.362166	0.924843	0.270474	1.08087	0.133412	1.22168	0.0287309	8	3	45.5013	Malectin OS=Mus musculus GN=Mlec
P35979	Rpl12	11095.3	12410.3	12533.9	11679.6	11393.5	11822	11983.7	11437	11802.9	11609.9	11278.7	10879.5	12013.2	11631.7	11741.2	11256.1	0.968241	0.555797	0.95868	0.211579	0.967707	0.257078	0.977358	0.706443	6	3	36.4714	60S ribosomal protein L12 OS=Mus musculus GN=Rpl12
Q62318	Trim28	8533.53	8310.85	7736.29	6059.09	6182.69	5883.33	6597.14	6760.75	5853.49	7532.88	7482.88	7102.84	8193.56	6041.7	6403.79	7372.87	0.737373	0.0196097	1.15133	0.0979145	1.22033	0.00797336	0.781565	0.00744668	19	6	89.928	Transcription intermediary factor 1-beta OS=Mus musculus GN=Trim28
P50446	Krt6a	204.756	500.99	436.209	435.742	458.102	416.958	296.265	324.136	229.294	135.88	190.185	347.416	380.651	436.934	283.232	224.494	1.14786	0.652271	0.792614	0.54116	0.513793	0.0994053	0.744071	0.523977	50	1	252.754	Keratin, type II cytoskeletal 6A OS=Mus musculus GN=Krt6a
P47738	Aldh2	107630	105720	102275	91843.9	86949.6	85538.4	104181	103684	100467	102146	101931	98660.3	105209	88110.6	102777	100912	0.837484	0.0111482	0.981854	0.391117	1.14529	0.0182658	0.97689	0.0378946	48	24	308.091	Aldehyde dehydrogenase, mitochondrial OS=Mus musculus GN=Aldh2
P17918	Pcna	6200.53	6654.87	6704.33	16474	13254.1	13483.3	6400.58	6445.34	6993.96	4961.94	4664.26	5259.59	6519.91	14403.8	6613.29	4961.93	2.2092	0.033748	0.750297	0.0166734	0.344488	0.0212622	1.01432	0.607162	8	3	72.052	Proliferating cell nuclear antigen OS=Mus musculus GN=Pcna
Q9WV54	Asah1	8488.62	8272.48	8565.44	9334.45	9518.8	9209.53	9913.16	9780.85	9267.2	9550.36	9813.17	9603.24	8442.18	9354.26	9653.74	9655.59	1.10804	0.00934692	1.00019	0.994436	1.03221	0.0922397	1.14351	0.0404366	10	5	40.9005	Acid ceramidase OS=Mus musculus GN=Asah1
Q9Z2U0	Psma7	25959.9	26328.4	26736.6	29407.3	29103.7	29603.1	29849.1	28461.1	29797.4	24999.7	25624.3	27674.6	26341.6	29371.4	29369.2	26099.5	1.11502	0.00587957	0.888671	0.0721371	0.888605	0.0742756	1.11493	0.0258581	15	11	110.103	Proteasome subunit alpha type-7 OS=Mus musculus GN=Psma7
Q6IRU5	Cltb	4840.19	4771.7	5000.18	4773.72	5084.95	5108.07	7843.05	7594.59	7901.37	5857.56	6113.59	6217.82	4870.69	4988.92	7779.67	6062.99	1.02427	0.47555	0.779337	0.00577314	1.21529	0.00756839	1.59724	0.000254167	7	4	48.0669	Clathrin light chain B OS=Mus musculus GN=Cltb
P58281	Opa1	5917.16	6040.13	5971.56	8846.76	9055.67	9052.18	6348.94	6306.04	6692.22	5910.36	6037.6	5713.73	5976.28	8984.87	6449.07	5887.23	1.50342	0.001322	0.912881	0.0561971	0.655238	0.000717219	1.07911	0.0667176	19	4	103.007	Dynamin-like 120 kDa protein, mitochondrial OS=Mus musculus GN=Opa1
O88685	Psmc3	10230.5	10524.8	9826.58	10545	11313.8	11419	9311.25	9239.41	9214.75	10605.8	10154.4	9931.58	10194	11092.6	9255.14	10230.6	1.08815	0.0997731	1.1054	0.0733496	0.922292	0.0951252	0.907904	0.0371058	14	8	78.1176	26S protease regulatory subunit 6A OS=Mus musculus GN=Psmc3
P59242	Cgn	523.54	687.366	669.637	565.287	455.588	541.476	413.757	473.688	547.846	638.276	415.472	376.389	626.848	520.784	478.43	476.713	0.830797	0.223676	0.99641	0.987614	0.915376	0.693315	0.763232	0.0357799	9	2	43.9892	Cingulin OS=Mus musculus GN=Cgn
P07901	Hsp90aa1	52877.6	52120.5	53627.1	56690.9	58186.4	59046.1	59298.1	61506	62380	54369.8	54065.9	54776.5	52875.1	57974.5	61061.4	54404.1	1.09644	0.0185719	0.890974	0.0412421	0.938415	0.0439476	1.15482	0.0109552	61	15	343.092	Heat shock protein HSP 90-alpha OS=Mus musculus GN=Hsp90aa1
P18760	Cfl1	46935.2	46002	40272.1	44200	47444.5	44721	53619.8	52608.4	50643.1	53306.3	53635.2	52551.1	44403.1	45455.2	52290.5	53164.2	1.02369	0.735178	1.01671	0.506405	1.1696	0.0219834	1.17763	0.0350479	20	7	141.784	Cofilin-1 OS=Mus musculus GN=Cfl1
Q9EPU0	Upf1	2728.55	3208.74	3283.29	4060.62	3689.71	4242.56	7574.56	7887.89	8130.08	6390.76	6837.65	7455.17	3073.53	3997.63	7864.18	6894.53	1.30067	0.0383201	0.876701	0.114714	1.72465	0.0101216	2.55868	0.00174058	4	2	18.9852	Regulator of nonsense transcripts 1 OS=Mus musculus GN=Upf1
Q02819	Nucb1	35755.8	34954.8	34753.5	36115.4	37675.9	38252.7	38915.1	39786.4	40763.8	36679.7	35237.7	37823.3	35154.7	37348	39821.8	36580.2	1.06239	0.0917298	0.918599	0.0623903	0.979443	0.522362	1.13276	0.0291557	30	14	183.352	Nucleobindin-1 OS=Mus musculus GN=Nucb1
P35293	Rab18	5680.11	5113.33	5666.06	5236.15	5574.68	5322.09	4154.73	4922.7	4775.22	4674.28	4715.3	4393.04	5486.5	5377.64	4617.55	4594.21	0.980159	0.69839	0.994944	0.950602	0.854317	0.0137066	0.841621	0.159631	8	2	69.9288	Ras-related protein Rab-18 OS=Mus musculus GN=Rab18
Q99MR6	Srrt	1997.61	1943.35	1878.67	1171.91	1117.68	1238.3	1624.75	1616.04	1689.45	2109.29	2397.87	2161.71	1939.88	1175.97	1643.41	2222.96	0.606207	0.00218316	1.35264	0.0456965	1.89032	0.00935249	0.847174	0.0321659	12	2	64.7348	Serrate RNA effector molecule homolog OS=Mus musculus GN=Srrt
O55029	Copb2	29134.2	28713.4	28802.5	28453.5	27853.6	27470.6	28874.1	27576.9	26068.2	31178.1	31096.2	31159	28883.4	27925.9	27506.4	31144.4	0.966852	0.0972554	1.13226	0.0860218	1.11525	0.0170398	0.952328	0.202838	26	15	210.131	Coatomer subunit beta' OS=Mus musculus GN=Copb2
Q7TPR4	Actn1	40703.2	42534.7	40422.3	27230.5	26170.2	24638.8	31994.5	29728.3	29518.9	40770.7	41549	40230.5	41220.1	26013.2	30413.9	40850.1	0.631081	0.00232381	1.34314	0.0113696	1.57036	0.00294596	0.737843	0.012438	44	10	310.226	Alpha-actinin-1 OS=Mus musculus GN=Actn1
Q9R111	Gda	984.369	900.398	970.802	1025.37	983.652	971.635	1307.65	1323.15	986.76	803.252	937.099	960.288	951.856	993.552	1205.85	900.213	1.0438	0.316787	0.746537	0.144449	0.906056	0.225819	1.26684	0.173447	6	2	30.5492	Guanine deaminase OS=Mus musculus GN=Gda
Q9D6J6	Ndufv2	9035.63	8782.25	7899.65	7580.04	6827.42	6047.2	8398.56	7825.3	6565.84	11120.8	11401.8	10551.7	8572.51	6818.22	7596.57	11024.8	0.795359	0.0676734	1.45128	0.0366469	1.61696	0.00941224	0.886154	0.0622541	8	3	59.6725	NADH dehydrogenase [ubiquinone] flavoprotein 2, mitochondrial OS=Mus musculus GN=Ndufv2
Q9DB20	Atp5o	9515.14	9055.12	9865.86	9260.9	9079.52	8928.32	8768.57	8764.08	9144.18	9917.91	10151.6	9811.13	9478.7	9089.58	8892.28	9960.22	0.958948	0.29247	1.1201	0.0168073	1.09578	0.00993849	0.938132	0.0546799	9	3	66.0775	ATP synthase subunit O, mitochondrial OS=Mus musculus GN=Atp5o
Q61414	Krt15	3702.37	3739.22	4080.91	3164.36	3436.36	3784.08	5645.36	5816.55	5753.88	6114.41	6009.74	6447.34	3840.83	3461.6	5738.6	6190.5	0.901262	0.214188	1.07875	0.106382	1.78833	0.0029426	1.4941	0.00550782	48	4	263.745	Keratin, type I cytoskeletal 15 OS=Mus musculus GN=Krt15
P11276	Fn1	9199.32	9443.62	8732.91	9510.48	9601.32	9619.5	9833.58	9282.49	10167.6	9618.51	9635.17	10532.4	9125.28	9577.1	9761.22	9928.69	1.04951	0.209841	1.01716	0.749162	1.03671	0.408408	1.06969	0.302993	26	8	120.696	Fibronectin OS=Mus musculus GN=Fn1
P19783	Cox4i1	78014.3	77672.9	79801.2	86870.9	87459.8	90963.9	125789	130205	134097	96593.4	95732.4	98367.7	78496.1	88431.5	130031	96897.8	1.12657	0.019456	0.745192	0.0154593	1.09574	0.0183301	1.65652	0.000703281	24	13	134.363	Cytochrome c oxidase subunit 4 isoform 1, mitochondrial OS=Mus musculus GN=Cox4i1
Q6GQT9	Nomo1	2084.69	1944.49	1970.27	1970.69	2031.73	2120.39	1952.83	2320.08	2132.92	2553.44	2206.59	2620.47	1999.82	2040.94	2135.28	2460.17	1.02056	0.597111	1.15215	0.186023	1.20541	0.0946881	1.06774	0.46148	7	2	33.3367	Nodal modulator 1 OS=Mus musculus GN=Nomo1
Q99MD9	Nasp	2931.03	2876.26	3171.36	3896.18	4210.63	4159.98	3133.63	3390.83	3686.28	3075.31	3113.64	2911.24	2992.88	4088.93	3403.58	3033.4	1.36622	0.00710024	0.891237	0.196972	0.741855	0.00661931	1.13722	0.0528983	7	3	37.9042	Nuclear autoantigenic sperm protein OS=Mus musculus GN=Nasp
Q9CS72	Filip1	2782.54	2802.47	2788.16	3397.16	3158.19	3259.5	2760.35	2498.77	3071.98	2124.2	2378.1	2523.3	2791.06	3271.62	2777.03	2341.87	1.17218	0.0404946	0.843297	0.162524	0.715813	0.0125327	0.994975	0.901064	3	1	10.2542	Filamin-A-interacting protein 1 OS=Mus musculus GN=Filip1
Q80UG5	Sept9	3137.33	2944.45	2815.03	2962.21	3349.41	3193.82	2659.14	2406.86	2673.87	2179.34	2367.5	2499.18	2965.6	3168.48	2579.95	2348.67	1.06841	0.298653	0.910353	0.207249	0.741261	0.0137066	0.869959	0.0910603	3	3	14.3846	Septin-9 OS=Mus musculus GN=Sept9
Q9DB15	Mrpl12	12612.1	11951.8	11226.2	11191.4	11236.4	10560.5	11671	11628.5	10650.8	11133.6	11440.4	11585.6	11930	10996.1	11316.8	11386.5	0.921714	0.177747	1.00617	0.892581	1.03551	0.256323	0.948594	0.0682112	4	2	33.36	39S ribosomal protein L12, mitochondrial OS=Mus musculus GN=Mrpl12
Q9WV27	Atp1a4	2839.59	2787.01	2745.19	2369.67	2232	1915.82	2536.86	2302.73	2395.29	2353.06	2135.29	2451.16	2790.6	2172.5	2411.63	2313.17	0.778506	0.0689716	0.959173	0.524321	1.06475	0.486669	0.864198	0.0240019	29	2	164.008	Sodium/potassium-transporting ATPase subunit alpha-4 OS=Mus musculus GN=Atp1a4
Q9CR68	Uqcrfs1	3815.6	3493.37	3018.26	3823.17	4127.32	3655.47	5104.34	5059.2	4165.64	4657.11	4989.06	4620.32	3442.41	3868.65	4776.39	4755.5	1.12382	0.259908	0.995625	0.963667	1.22924	0.0186543	1.38752	0.00491958	6	4	48.7699	Cytochrome b-c1 complex subunit Rieske, mitochondrial OS=Mus musculus GN=Uqcrfs1
O35593	Psmd14	1313.66	1254.54	1267.81	1058.71	1141.69	995.273	718.594	635.022	692.359	992.852	1032.76	776.229	1278.67	1065.22	681.991	933.948	0.833072	0.0470196	1.36944	0.125898	0.876762	0.282676	0.53336	0.00164751	2	2	11.4598	26S proteasome non-ATPase regulatory subunit 14 OS=Mus musculus GN=Psmd14
P11983	Tcp1	21758.8	22315.8	22786.3	21481.1	21593.9	21949.4	17824.9	17716.3	18254.5	18105.7	16459.2	17376	22287	21674.8	17931.9	17313.6	0.972533	0.214154	0.965521	0.401066	0.798792	0.0171455	0.804592	0.00183715	19	5	112.803	T-complex protein 1 subunit alpha OS=Mus musculus GN=Tcp1
Q61768	Kif5b	8509.07	9158.97	9072.25	7892.75	7334.62	6939.17	7991.94	6857.49	7657.2	6863.9	7048.67	7684.99	8913.43	7388.84	7502.21	7199.18	0.828956	0.0317277	0.959609	0.587364	0.974331	0.677172	0.841675	0.117346	39	5	234.485	Kinesin-1 heavy chain OS=Mus musculus GN=Kif5b
Q9R078	Prkab1	1668.81	1997.8	1721.21	904.36	913.394	613.684	1373.3	1251.8	1101.67	2320.54	1989.04	1896.01	1795.94	810.479	1242.26	2068.53	0.451284	0.0103228	1.66514	0.0311765	2.55224	0.00725481	0.691703	0.0517881	4	3	16.2631	5'-AMP-activated protein kinase subunit beta-1 OS=Mus musculus GN=Prkab1
P60824	Cirbp	781.282	669.166	508.441	261.956	278.269	307.992	467.426	475.834	304.493	641.707	750.682	491.281	652.963	282.739	415.918	627.89	0.433009	0.0689716	1.50965	0.145051	2.22074	0.0605342	0.63697	0.0154988	1	1	6.4367	Cold-inducible RNA-binding protein OS=Mus musculus GN=Cirbp
Q9WV32	Arpc1b	22206.3	22902.3	23798.5	26879	26767.8	26954.9	33727.2	33396.2	34689.3	28785.5	29177.3	29455.1	22969	26867.2	33937.6	29139.3	1.16972	0.0304179	0.858615	0.0119232	1.08457	0.0119094	1.47754	0.00121709	10	6	71.5833	Actin-related protein 2/3 complex subunit 1B OS=Mus musculus GN=Arpc1b
Q60605	Myl6	143583	146179	145993	148747	145997	145834	155039	155563	153986	133284	128746	130106	145252	146859	154862	130712	1.01107	0.331639	0.844053	0.0103887	0.890049	0.00479933	1.06616	0.0111949	33	21	150.111	Myosin light polypeptide 6 OS=Mus musculus GN=Myl6
Q9JKF1	Iqgap1	30810	31143.9	29485.3	29084.9	30301.5	27921.9	19350.7	19652.1	18261	27872.9	27397.7	27902.1	30479.7	29102.8	19088	27724.2	0.954824	0.242178	1.45245	0.00844209	0.952633	0.213364	0.626251	0.000143765	50	16	309.586	Ras GTPase-activating-like protein IQGAP1 OS=Mus musculus GN=Iqgap1
P18653	Rps6ka1	2233.98	2236.74	2181.75	3070.56	3217.86	3421.09	2785.54	3085.88	3168.75	2604.35	2426.01	2521.96	2217.49	3236.51	3013.39	2517.44	1.45954	0.0229456	0.835418	0.0710637	0.777827	0.0182658	1.35892	0.0208819	13	2	79.1209	Ribosomal protein S6 kinase alpha-1 OS=Mus musculus GN=Rps6ka1
Q9CVB6	Arpc2	26013.6	25521.4	25460.4	24741.2	24578.4	24860.8	29729.1	30336.7	29702	27393	26519.1	26167.9	25665.1	24726.8	29922.6	26693.3	0.963441	0.0399779	0.892079	0.0182891	1.07953	0.0446212	1.16589	0.00543299	15	6	105.298	Actin-related protein 2/3 complex subunit 2 OS=Mus musculus GN=Arpc2
P56399	Usp5	1699.2	1929.69	1806.36	1148.18	750.364	1045.98	1181.59	1010.41	970.108	1336.16	1437.46	1380.67	1811.75	981.506	1054.04	1384.76	0.541744	0.0225844	1.31377	0.0528587	1.41085	0.0948298	0.581778	0.0266581	12	1	69.2813	Ubiquitin carboxyl-terminal hydrolase 5 OS=Mus musculus GN=Usp5
Q9DCW4	Etfb	57668.3	57388.3	58438.3	62083.1	63175.4	63000.4	60897.4	61637.2	60323.4	59557.3	58181.7	61583.8	57831.6	62753	60952.7	59774.3	1.0851	0.0043962	0.980667	0.434383	0.952533	0.108567	1.05397	0.0446557	20	11	158.692	Electron transfer flavoprotein subunit beta OS=Mus musculus GN=Etfb
Q91WG0	Ces2c	14604.1	13495.5	11570.3	13786.9	13272.7	12262.7	13515.9	12606.7	11580.3	19215.4	18510.7	17465.7	13223.3	13107.5	12567.6	18397.3	0.99124	0.937103	1.46386	0.0114312	1.40357	0.00628276	0.950417	0.19004	15	8	108.077	Acylcarnitine hydrolase OS=Mus musculus GN=Ces2c
O08677	Kng1	8140.17	8119.21	8395.65	9374.28	8804.03	9108.63	12089.7	12278.9	12158.1	10115.4	9952.42	10237.6	8218.34	9095.65	12175.6	10101.8	1.10675	0.037446	0.829677	0.00346415	1.11062	0.0242451	1.48151	0.00102177	8	3	40.4606	Kininogen-1 OS=Mus musculus GN=Kng1
Q9WUU7	Ctsz	6027.29	6305.03	6153.01	5988.95	6105.54	6398.23	8476.08	8401.15	8236.33	7969.3	7963.95	8134.25	6161.78	6164.24	8371.19	8022.5	1.0004	0.989786	0.958346	0.0490943	1.30146	0.00513578	1.35857	0.00315626	4	1	38.0498	Cathepsin Z OS=Mus musculus GN=Ctsz
O35226	Psmd4	11399.6	11157.6	11986.7	9054.82	9190.77	9182.84	13028.9	12910.2	13776	12752.1	12443.2	12181.6	11514.6	9142.81	13238.4	12459	0.794017	0.0235103	0.941128	0.134314	1.36271	0.00577707	1.1497	0.000649107	3	1	21.9884	26S proteasome non-ATPase regulatory subunit 4 OS=Mus musculus GN=Psmd4
Q60967	Papss1	1077.6	1027.92	837.427	702.787	830.336	895.961	1064.7	1465.02	1112.04	1198.13	1200.04	1000.59	980.98	809.694	1213.92	1132.92	0.825393	0.191044	0.933276	0.673468	1.3992	0.0363896	1.23746	0.204071	7	1	41.7268	Bifunctional 3'-phosphoadenosine 5'-phosphosulfate synthase 1 OS=Mus musculus GN=Papss1
Q9D312	Krt20	104538	101995	99469.7	109657	107521	104858	109584	108858	105515	108123	105338	105875	102001	107345	107986	106445	1.0524	0.0925999	0.985732	0.449666	0.991612	0.657023	1.05868	0.00844278	53	32	369.302	Keratin, type I cytoskeletal 20 OS=Mus musculus GN=Krt20
Q3UQ44	Iqgap2	5184.31	5351.15	5253.61	5800.12	5639.67	5325.07	5133.73	5306.44	5088.08	4953.62	4579	4819.38	5263.02	5588.29	5176.08	4784	1.0618	0.181604	0.924251	0.0892631	0.856077	0.0234388	0.983481	0.160178	32	6	166.056	Ras GTPase-activating-like protein IQGAP2 OS=Mus musculus GN=Iqgap2
P48036	Anxa5	27574.6	27373.1	27526.5	24103.5	23888.5	22568.5	24536.9	24961	24237.5	22062.1	21339.7	21198	27491.4	23520.2	24578.5	21533.3	0.855546	0.0308519	0.876103	0.00977514	0.915524	0.0519001	0.894042	0.00845	16	9	131.317	Annexin A5 OS=Mus musculus GN=Anxa5
P50431	Shmt1	6006.17	6577.92	6814.6	6928.55	7027.71	7191.88	8434.75	8110.1	7996.82	6620.07	6309.13	6510	6466.23	7049.38	8180.56	6479.73	1.09018	0.173056	0.79209	0.00845997	0.919193	0.0198291	1.26512	0.0477284	12	2	75.2823	Serine hydroxymethyltransferase, cytosolic OS=Mus musculus GN=Shmt1
Q9D7B6	Acad8	760.239	760.944	519.611	582.678	544.352	627.711	551.983	894.591	621.021	765.428	532.262	503.294	680.265	584.914	689.198	600.328	0.859833	0.415183	0.871052	0.616412	1.02635	0.887233	1.01313	0.971205	3	1	14.2122	Isobutyryl-CoA dehydrogenase, mitochondrial OS=Mus musculus GN=Acad8
Q9JMH9	Myo18a	1108.51	1165.82	1167.89	1515.24	2038.72	2040.01	1981.62	1928.89	1867.81	2037.08	1817.02	2165.48	1147.41	1864.66	1926.11	2006.53	1.62511	0.0866227	1.04175	0.591822	1.07608	0.572656	1.67866	0.00401999	10	3	44.1888	Unconventional myosin-XVIIIa OS=Mus musculus GN=Myo18a
Q9WV80	Snx1	1991.38	2058.54	1841.48	1617.96	1968.66	1695.32	2477.09	2467.75	2305.37	2183.08	2019.29	2000.14	1963.8	1760.65	2416.74	2067.5	0.896551	0.246876	0.855494	0.036551	1.17429	0.109411	1.23064	0.00419014	12	2	61.986	Sorting nexin-1 OS=Mus musculus GN=Snx1
Q9CRB6	Tppp3	22024.3	21776	21378.5	21020.1	20659.2	20402	23765	25091.5	24096.8	18469	18321.4	18242	21726.2	20693.8	24317.8	18344.1	0.952478	0.0360803	0.754351	0.0180346	0.886456	0.00838116	1.11928	0.0281737	14	10	95.5428	Tubulin polymerization-promoting protein family member 3 OS=Mus musculus GN=Tppp3
Q63844	Mapk3	9387.67	9339.95	9291.11	9505.95	9798.52	9602.44	10403	10210.9	9857.75	9389.6	9581.56	9322.72	9339.58	9635.64	10157.2	9431.3	1.0317	0.0997148	0.928532	0.0620525	0.978793	0.188474	1.08755	0.022778	10	2	61.5709	Mitogen-activated protein kinase 3 OS=Mus musculus GN=Mapk3
Q9CQI6	Cotl1	16545.2	16224.1	16356.9	19175.4	19074.3	19559.2	20986.7	20277.8	20507.8	17195.6	17478.4	17917.7	16375.4	19269.6	20590.8	17530.5	1.17674	0.00330694	0.851379	0.00667319	0.909752	0.0103018	1.25742	0.00038439	10	6	65.0545	Coactosin-like protein OS=Mus musculus GN=Cotl1
A2AFS3	Kiaa1324	3970.04	3900.26	3658.17	5906.91	6049.96	6151.26	6029.67	6453.65	6369.07	5962.38	6352.12	6308.48	3842.82	6036.04	6284.13	6207.66	1.57073	0.00198798	0.987831	0.745638	1.02843	0.353658	1.63529	0.00649606	3	1	15.1291	UPF0577 protein KIAA1324 OS=Mus musculus GN=Kiaa1324
Q80UU9	Pgrmc2	3689.54	3782.92	3876.1	3986.01	3873.68	4108.35	4815.05	4483.51	4594.56	3552.35	3467.51	4411.52	3782.85	3989.35	4631.04	3810.46	1.05459	0.119383	0.822809	0.156843	0.95516	0.65745	1.22422	0.0243047	4	4	24.2622	Membrane-associated progesterone receptor component 2 OS=Mus musculus GN=Pgrmc2
Q9DBG6	Rpn2	27175.9	26793.9	27262.6	24845.9	24329.8	24119.1	25486.5	25655.8	25785.7	26312	26178.5	26620.9	27077.5	24431.6	25642.7	26370.5	0.902286	0.00662314	1.02838	0.0388115	1.07936	0.00981592	0.947011	0.0120556	18	10	113.97	Dolichyl-diphosphooligosaccharide--protein glycosyltransferase subunit 2 OS=Mus musculus GN=Rpn2
Q99LB2	Dhrs4	3325.92	3514.78	3665.8	4266.81	4025.95	3961.29	3159.82	3214.24	3324.83	3325.93	3594.51	3343.47	3502.17	4084.68	3232.96	3421.3	1.16633	0.0303849	1.05826	0.215486	0.837593	0.0154747	0.923131	0.030891	3	2	23.9733	Dehydrogenase/reductase SDR family member 4 OS=Mus musculus GN=Dhrs4
Q64521	Gpd2	6466.69	6235.98	5717.32	7549.76	7308.38	6920.81	7097.72	7575.31	7352.28	6006.55	6448.49	5960.4	6140	7259.65	7341.77	6138.48	1.18235	0.0396897	0.836104	0.0204994	0.845561	0.0211062	1.19573	0.0604704	21	7	116.074	Glycerol-3-phosphate dehydrogenase, mitochondrial OS=Mus musculus GN=Gpd2
Q99MY8	Ash1l	5348.17	5311.71	5559.85	6204.45	6774.29	6802.04	7957.98	8107.25	7819.45	6815.72	6854.9	6878	5406.57	6593.59	7961.56	6849.54	1.21955	0.0345731	0.860326	0.0193281	1.03882	0.363077	1.47257	0.00387615	22	2	100.33	Histone-lysine N-methyltransferase ASH1L OS=Mus musculus GN=Ash1l
Q6URW6	Myh14	60205	60854.4	60154.3	91858.3	91532.2	90925.4	64994.9	63865.7	63809.7	66215.9	65101.7	65380.2	60404.6	91438.6	64223.4	65566	1.51377	0.000105063	1.0209	0.104657	0.717049	0.00028337	1.06322	0.0175908	129	37	844.829	Myosin-14 OS=Mus musculus GN=Myh14
P97805	Fam3d	18907	19246.1	18705.9	18561.5	16670.5	16865	22812.3	24354.5	24025.2	21818.2	22538.3	21625	18953	17365.7	23730.7	21993.8	0.916251	0.154845	0.926811	0.0839594	1.26651	0.01685	1.25208	0.0069769	9	5	75.7211	Protein FAM3D OS=Mus musculus GN=Fam3d
P97927	Lama4	2096.61	2260.1	2152	2257.97	2429.8	2346.92	1860.22	2021.11	2144.11	2018.91	1756.07	1991.46	2169.57	2344.9	2008.48	1922.15	1.08081	0.100422	0.957016	0.57753	0.819715	0.0328561	0.925749	0.171224	17	3	79.2335	Laminin subunit alpha-4 OS=Mus musculus GN=Lama4
Q8VEK3	Hnrnpu	87249.4	86775.5	87182.5	85873.7	85622.4	86096.4	88747.9	85375.8	88515.9	81913.2	81554.8	82489.1	87069.1	85864.1	87546.5	81985.7	0.98616	0.0147229	0.936481	0.0643894	0.95483	0.00513578	1.00548	0.671364	28	19	201.848	Heterogeneous nuclear ribonucleoprotein U OS=Mus musculus GN=Hnrnpu
Q2KHK6	Gsdmc2	2601.55	2813.75	2748.41	2071.32	2140.51	1826.09	2864.44	2448.11	2867.73	2216.77	2272.18	2217.45	2721.24	2012.64	2726.76	2235.47	0.739605	0.0179687	0.819826	0.116059	1.11071	0.174411	1.00203	0.998553	11	2	55.9592	Gasdermin-C2 OS=Mus musculus GN=Gsdmc2
Q9JII6	Akr1a1	45696.1	44542.6	46231.3	44255.9	43965.8	42186.1	43529.6	41774.8	42612.4	44599.1	44008.3	42740	45490	43469.3	42638.9	43782.5	0.955578	0.111775	1.02682	0.271831	1.00721	0.760761	0.937325	0.0209184	13	10	105.943	Alcohol dehydrogenase [NADP(+)] OS=Mus musculus GN=Akr1a1
Q9Z2X1	Hnrnpf	22530.5	21869.7	22622.7	23897.3	23210.9	24157.4	23141.8	23935.3	23104.4	22620.6	22126.9	21572.3	22341	23755.2	23393.8	22106.6	1.0633	0.0405249	0.944976	0.0704236	0.930601	0.0297968	1.04713	0.17354	16	7	104.341	Heterogeneous nuclear ribonucleoprotein F OS=Mus musculus GN=Hnrnpf
Q62313	Tgoln1	1822.77	1751.51	1846.69	1902.03	1889.27	1811.4	1527.57	1445.97	1157.72	1471.42	1409.6	1466.01	1806.99	1867.56	1377.08	1449.01	1.03352	0.261887	1.05223	0.657117	0.775881	0.00309175	0.762087	0.0981972	5	1	26.4937	Trans-Golgi network integral membrane protein 1 OS=Mus musculus GN=Tgoln1
O70503	Hsd17b12	1736.91	1585.8	1576.43	1906.08	1952.19	2236.51	1631.92	1363.27	1556.52	1283.08	1418.43	1526.85	1633.05	2031.59	1517.24	1409.45	1.24405	0.0725313	0.928961	0.446784	0.693768	0.0216085	0.929084	0.203699	3	1	22.2326	Estradiol 17-beta-dehydrogenase 12 OS=Mus musculus GN=Hsd17b12
Q8K5B2	Mcfd2	1822.81	1632.98	2163.26	2335.8	2262.35	2135.16	3138.35	2337.43	2832.21	2272.77	2229.58	2167.15	1873.02	2244.44	2769.33	2223.17	1.1983	0.173752	0.802781	0.20596	0.990522	0.794624	1.47854	0.0401094	1	1	7.7994	Multiple coagulation factor deficiency protein 2 homolog OS=Mus musculus GN=Mcfd2
Q8VEM8	Slc25a3	54443.5	55015	57104.5	58337.6	58521.4	59616.9	63785.3	63562.7	65302.6	63436.8	61244.6	62663.9	55521	58825.3	64216.9	62448.4	1.05951	0.0659232	0.972462	0.162434	1.06159	0.0254834	1.15662	0.00231214	20	14	119.838	Phosphate carrier protein, mitochondrial OS=Mus musculus GN=Slc25a3
P67778	Phb	32158.3	32769.7	32953.1	33755.6	34587.4	34061.5	31537	32784.8	33193.6	33584.7	33326.6	33000.4	32627	34134.9	32505.1	33303.9	1.04621	0.0285891	1.02457	0.318788	0.975657	0.0779652	0.996264	0.6735	15	9	123.572	Prohibitin OS=Mus musculus GN=Phb
Q64176	Ces1e	1417.69	1402.15	1299.68	1368.91	1273.68	1212.94	783.001	902.297	839.703	1276.53	1221.93	1343.17	1373.17	1285.18	841.667	1280.54	0.935917	0.265412	1.52144	0.00866443	0.996394	0.945607	0.612935	0.0108988	3	1	23.6491	Carboxylesterase 1E OS=Mus musculus GN=Ces1e
Q3UM45	Ppp1r7	2101.91	2016.39	1866.84	1979.7	2007.58	2022.34	2266.34	2291.65	2488.08	1903.77	1857.29	2091.85	1995.05	2003.21	2348.69	1950.97	1.00409	0.938252	0.830663	0.0440064	0.973922	0.586708	1.17726	0.124169	2	2	9.9982	Protein phosphatase 1 regulatory subunit 7 OS=Mus musculus GN=Ppp1r7
Q922D8	Mthfd1	14912.7	15448.9	15724.5	18773.6	18413.7	19083.4	17641	18678.1	18247.7	16812.8	17325	17400.5	15362	18756.9	18188.9	17179.4	1.22099	0.00451508	0.944499	0.100941	0.915899	0.01131	1.18402	0.00488153	22	10	141.055	C-1-tetrahydrofolate synthase, cytoplasmic OS=Mus musculus GN=Mthfd1
Q6VNB8	Wdfy3	912.752	756.692	460.505	184.463	253.337	315.208	445.041	425.26	505.623	829.681	879.662	605.454	709.983	251.003	458.641	771.599	0.353534	0.101367	1.68236	0.0995312	3.07406	0.0257786	0.645989	0.250823	6	1	22.801	WD repeat and FYVE domain-containing protein 3 OS=Mus musculus GN=Wdfy3
Q9QZD9	Eif3i	3409.33	3430.33	3672.41	3710.78	3374.25	3582.23	3295.41	3483.49	3537.95	3105.64	2876.48	2751.72	3504.02	3555.76	3438.95	2911.28	1.01476	0.759288	0.846561	0.0459032	0.818751	0.0219834	0.981429	0.388123	6	1	35.1249	Eukaryotic translation initiation factor 3 subunit I OS=Mus musculus GN=Eif3i
Q9Z0N1	Eif2s3x	5670.5	5904.5	6044.61	5293.93	6296.91	5657.76	5709.1	6124.85	6447.35	5860.01	5895.45	5473.86	5873.2	5749.53	6093.76	5743.11	0.978943	0.771482	0.942456	0.323453	0.998882	0.986208	1.03755	0.163514	5	3	26.3387	Eukaryotic translation initiation factor 2 subunit 3, X-linked OS=Mus musculus GN=Eif2s3x
P97427	Crmp1	2649.82	2545.22	2696.3	2850.17	2988.02	3318.63	2667.05	2224.87	2844.95	2446.53	2516.4	2426.15	2630.45	3052.28	2578.96	2463.03	1.16036	0.122864	0.955048	0.661512	0.806948	0.0682498	0.980426	0.703817	18	2	90.4783	Dihydropyrimidinase-related protein 1 OS=Mus musculus GN=Crmp1
Q6PHZ2	Camk2d	918.392	897.866	823.515	256.365	342.292	319.17	711.469	552.777	508.527	1121.68	1016.66	770.424	879.924	305.942	590.924	969.585	0.347692	0.00232381	1.64079	0.0866453	3.16918	0.0328846	0.671562	0.0331507	7	2	49.6617	Calcium/calmodulin-dependent protein kinase type II subunit delta OS=Mus musculus GN=Camk2d
Q61656	Ddx5	15608.8	15814.9	14768.7	15175	15067.5	14941.5	17679.2	16918	16355.1	15434.5	14549.2	15011.7	15397.5	15061.4	16984.1	14998.5	0.978172	0.465046	0.883088	0.0446484	0.995824	0.848917	1.10305	0.027556	35	8	255.408	Probable ATP-dependent RNA helicase DDX5 OS=Mus musculus GN=Ddx5
P80318	Cct3	15994	15530.9	14421.6	13363.8	13563.2	12918.4	13431.2	13282.7	11922.2	15300.8	15926.2	15534.5	15315.5	13281.8	12878.7	15587.2	0.867212	0.0628032	1.21031	0.0482503	1.17357	0.00462161	0.84089	0.00317265	19	8	123.046	T-complex protein 1 subunit gamma OS=Mus musculus GN=Cct3
Q9D0K2	Oxct1	13552.5	13430.4	12653.3	17306.9	17507.8	17587.4	14480.7	14109.1	14104.4	13325.7	12846.2	13080.4	13212.1	17467.4	14231.4	13084.1	1.32208	0.0105027	0.919384	0.0181077	0.74906	0.00106011	1.07715	0.0514176	11	4	71.7173	Succinyl-CoA:3-ketoacid coenzyme A transferase 1, mitochondrial OS=Mus musculus GN=Oxct1
P33175	Kif5a	747.437	873.978	980.116	1248.41	1357.5	1390.37	2576.03	2946.15	2902.41	2933.51	3284.82	3336.52	867.177	1332.09	2808.2	3184.95	1.53613	0.0211712	1.13416	0.148056	2.39093	0.00769449	3.23832	0.00160573	8	2	43.9697	Kinesin heavy chain isoform 5A OS=Mus musculus GN=Kif5a
Q91WG5	Prkag2	904.935	848.867	901.767	1407.76	1368.26	1313.4	2502.96	2377.94	2475.52	2308.77	2173.43	2348.28	885.19	1363.14	2452.14	2276.83	1.53994	0.00385664	0.928507	0.105785	1.67028	0.00349332	2.77018	3.35833e-05	2	1	10.4772	5'-AMP-activated protein kinase subunit gamma-2 OS=Mus musculus GN=Prkag2
P19096	Fasn	22820.1	22672.3	22516.2	23973.8	23535.3	22414.2	22018.5	22302.8	22148.3	22969.7	22958.1	23308.5	22669.5	23307.8	22156.5	23078.8	1.02815	0.36036	1.04162	0.0192406	0.990176	0.709652	0.97737	0.0707466	35	16	182.534	Fatty acid synthase OS=Mus musculus GN=Fasn
Q8BGD9	Eif4b	6756.94	7512.32	7934.4	4208.02	4000.75	4416.4	8117.63	7456.87	7883.69	13812.9	13610.4	13610.5	7401.22	4208.39	7819.4	13677.9	0.568608	0.0196097	1.74923	0.00585745	3.25016	0.000316715	1.0565	0.466896	4	2	31.2789	Eukaryotic translation initiation factor 4B OS=Mus musculus GN=Eif4b
Q9D0J8	Ptms	24484.9	24098.6	24210.6	27342.2	26892.7	26800.5	29821.1	28373.2	28150.1	21357.5	23178.8	24623.6	24264.7	27011.8	28781.5	23053.3	1.11321	0.00406968	0.800977	0.0358491	0.853453	0.0704059	1.18614	0.00654924	5	2	32.3516	Parathymosin OS=Mus musculus GN=Ptms
Q9Z1B7	Mapk13	590.601	584.467	533.63	579.797	523.695	536.751	720.343	687.35	642.321	775.596	591.503	526.063	569.566	546.748	683.338	631.054	0.959938	0.470032	0.923487	0.632996	1.15419	0.419411	1.19975	0.00340714	3	1	15.5656	Mitogen-activated protein kinase 13 OS=Mus musculus GN=Mapk13
Q9CPP6	Ndufa5	10128.9	10034.4	10467.3	12792.8	13374.7	13702.3	11969.8	12228.4	12541.4	10623.7	10844.4	11858	10210.2	13289.9	12246.5	11108.7	1.30164	0.00986219	0.90709	0.129367	0.835873	0.0236144	1.19944	0.0023835	5	3	45.5218	NADH dehydrogenase [ubiquinone] 1 alpha subcomplex subunit 5 OS=Mus musculus GN=Ndufa5
P35980	Rpl18	5478.59	5615.35	5312.05	3929.97	3662.26	3676.69	1954.99	1914.07	2004.56	3023.87	2862.2	2625.69	5468.66	3756.31	1957.87	2837.25	0.686878	0.00259014	1.44915	0.0385695	0.755331	0.0110508	0.358016	0.000819032	6	2	43.687	60S ribosomal protein L18 OS=Mus musculus GN=Rpl18
Q8BGH2	Samm50	1406.39	1327.82	1486.05	1433.24	1475.85	1518.46	1504.38	1363.95	1708.24	1364.75	1361.78	1488.16	1406.75	1475.85	1525.52	1404.9	1.04912	0.331922	0.920929	0.432314	0.951926	0.273375	1.08443	0.141609	5	1	29.7141	Sorting and assembly machinery component 50 homolog OS=Mus musculus GN=Samm50
P24527	Lta4h	29626.7	29640.3	29848.1	29715.8	30015.9	29712.7	37598	36563	35336.4	31022.5	31476	32376.6	29705	29814.8	36499.1	31625	1.0037	0.490803	0.866459	0.0238569	1.06072	0.0576128	1.22872	0.00948255	23	13	178.87	Leukotriene A-4 hydrolase OS=Mus musculus GN=Lta4h
Q9QYA2	Tomm40	475.088	441.348	333.287	1058.44	1054.78	996.865	154.189	60.5712	169.13	345.483	299.443	392.72	416.575	1036.7	127.963	345.882	2.48862	0.00716273	2.70298	0.0288646	0.333639	0.00108189	0.30718	0.081196	3	1	17.6217	Mitochondrial import receptor subunit TOM40 homolog OS=Mus musculus GN=Tomm40
P10126	Eef1a1	284312	271154	287125	313224	327728	340022	404129	402268	415250	334596	330120	343841	280864	326991	407216	336185	1.16423	0.0281115	0.825571	0.00551699	1.02812	0.412951	1.44987	0.00111497	47	30	187.814	Elongation factor 1-alpha 1 OS=Mus musculus GN=Eef1a1
Q9Z2I8	Suclg2	72043.3	71129.7	67759.1	70483.3	67874.4	63976.6	80073.3	78410	73905.4	73730.3	74770.1	73770.7	70310.7	67444.8	77462.9	74090.4	0.959239	0.346605	0.956463	0.276727	1.09853	0.0927791	1.10172	0.00317073	28	15	227.754	Succinyl-CoA ligase [GDP-forming] subunit beta, mitochondrial OS=Mus musculus GN=Suclg2
Q9D0F3	Lman1	1330.04	1577.63	1339.54	1271.33	1165.04	958.921	1542.36	2001.04	1861.32	1739.85	2054.31	1644.01	1415.74	1131.76	1801.57	1812.72	0.799415	0.122889	1.00619	0.963667	1.60168	0.0260466	1.27253	0.0448086	3	2	15.0341	Protein ERGIC-53 OS=Mus musculus GN=Lman1
P62270	Rps18	11047.2	11412.1	11141.3	8944.5	8593.81	8905.19	5391.33	5567.16	5867.45	7208.18	7765.76	7356.95	11200.2	8814.5	5608.65	7443.63	0.786997	0.00230762	1.32717	0.0102624	0.844476	0.0108408	0.500764	0.00134919	7	4	43.8736	40S ribosomal protein S18 OS=Mus musculus GN=Rps18
Q9JI91	Actn2	6152.49	6197.57	6090.42	7428.89	7908.39	7702.61	6759.28	7511.15	7195.42	6915.57	6675.2	6816.83	6146.83	7679.96	7155.28	6802.54	1.24942	0.0192471	0.950701	0.315658	0.885751	0.0229587	1.16406	0.0359002	23	3	144.309	Alpha-actinin-2 OS=Mus musculus GN=Actn2
O89079	Cope	2112.33	2546.26	1815.65	193.615	103.602	52.4348	189.916	107.218	0	2649.21	2685.46	2569.51	2158.08	116.551	99.0447	2634.73	0.0540067	0.0234031	26.6014	0.00181737	22.6059	0.00028337	0.0458949	0.127292	5	1	36.2654	Coatomer subunit epsilon OS=Mus musculus GN=Cope
Q9EQP2	Ehd4	2357.11	2492.02	2162.62	2491.81	2417.84	2122.35	2382.02	2670.48	2185.39	2322.35	2257.2	2153.99	2337.25	2344	2412.63	2244.51	1.00289	0.976239	0.930317	0.432951	0.957556	0.525892	1.03225	0.264219	11	2	59.5139	EH domain-containing protein 4 OS=Mus musculus GN=Ehd4
P51885	Lum	120989	121252	124519	105546	104546	106605	131787	132685	133913	92721.7	90601.7	91960.8	122254	105566	132795	91761.4	0.863498	0.00628647	0.691	0.00057607	0.869234	0.00140538	1.08623	0.00391426	17	12	126.504	Lumican OS=Mus musculus GN=Lum
Q9D8T2	Gsdmdc1	6012.71	6290.74	5660.17	2472.33	2710.75	2545.57	3553.31	3514.83	3105.35	5356.06	5347.82	4935.19	5987.87	2576.21	3391.16	5213.03	0.430239	0.00628647	1.53724	0.00845997	2.02352	0.00304615	0.566338	0.00153887	5	3	24.779	Gasdermin-D OS=Mus musculus GN=Gsdmdc1
Q91YN5	Uap1	38479.3	39951.3	41383.9	30339.6	29590.9	30530.3	35592.5	36596	37023.3	33957.4	33079.1	33185.3	39938.1	30153.6	36403.9	33407.3	0.755007	0.0141081	0.917683	0.0251639	1.1079	0.0053912	0.911508	0.0113071	14	4	87.9553	UDP-N-acetylhexosamine pyrophosphorylase OS=Mus musculus GN=Uap1
Q3TXS7	Psmd1	5548.62	5376.2	5453.71	5973.24	5405.62	5605.81	6211.38	6746.72	6627.61	8355.09	8098.66	7751.44	5459.51	5661.56	6528.57	8068.4	1.03701	0.406573	1.23586	0.0166734	1.42512	0.00335885	1.19582	0.0345258	6	3	37.2797	26S proteasome non-ATPase regulatory subunit 1 OS=Mus musculus GN=Psmd1
O88487	Dync1i2	819.056	711.005	820.734	970.515	930.874	1023.62	1396.77	1264.24	1401.65	1263.57	1144.11	1295.59	783.598	975.003	1354.22	1234.42	1.24426	0.0347812	0.911538	0.200191	1.26607	0.0263513	1.7282	0.000623422	3	1	19.3748	Cytoplasmic dynein 1 intermediate chain 2 OS=Mus musculus GN=Dync1i2
P97493	Txn2	2864.7	2834.82	2851.74	3640.12	3477.08	3630.83	2818.15	2682.79	2784	2606.36	2498.14	2652.65	2850.42	3582.68	2761.65	2585.71	1.2569	0.0153458	0.936294	0.0860024	0.721726	0.00178451	0.968857	0.114961	1	1	7.1492	Thioredoxin, mitochondrial OS=Mus musculus GN=Txn2
Q9D051	Pdhb	37009.3	37368.1	36295.5	34359	33925.2	34221.8	34534.5	33937.2	33612.3	32342.4	33285.1	31781.4	36890.9	34168.7	34028	32469.6	0.926208	0.0196097	0.954204	0.0906121	0.950275	0.0735911	0.922394	0.0098333	15	9	105.191	Pyruvate dehydrogenase E1 component subunit beta, mitochondrial OS=Mus musculus GN=Pdhb
P13707	Gpd1	24553.8	23670.1	24500.9	20631.5	21848.6	22135.4	20591.4	20969.4	21451.9	20169.2	20046.5	19969.2	24241.6	21538.5	21004.2	20061.6	0.888492	0.0292284	0.955124	0.100115	0.931432	0.109569	0.866453	0.0132602	12	3	70.0115	Glycerol-3-phosphate dehydrogenase [NAD(+)], cytoplasmic OS=Mus musculus GN=Gpd1
P97447	Fhl1	23410.6	22859	22849.3	28249	30033.8	30029.4	32839.1	33438	34004.7	24050	24668.5	25264.6	23039.6	29437.4	33427.2	24661	1.27769	0.016926	0.737753	0.00327872	0.837745	0.0124042	1.45086	0.00222031	9	6	97.5138	Four and a half LIM domains protein 1 OS=Mus musculus GN=Fhl1
P20060	Hexb	1921.05	1853.56	1777.91	1569.57	1717.43	1511.47	1573.74	1662.93	1039.35	1991.73	1882.56	1340.61	1850.84	1599.49	1425.34	1738.3	0.864199	0.0612069	1.21957	0.403522	1.08678	0.611804	0.770104	0.163224	5	2	24.5332	Beta-hexosaminidase subunit beta OS=Mus musculus GN=Hexb
Q60931	Vdac3	19481.4	19928.8	18209.3	18170.2	17175.9	15345.8	20034	20071.2	18212	25048.5	24496.2	23174.5	19206.5	16897.3	19439.1	24239.7	0.87977	0.131112	1.24696	0.0203373	1.43453	0.00935249	1.01211	0.295071	9	4	72.387	Voltage-dependent anion-selective channel protein 3 OS=Mus musculus GN=Vdac3
P61924	Copz1	7647.28	8712.34	8224.29	9670.8	8901.96	9821.37	9798.56	9700.24	9805.91	8852.38	8452.4	8725.85	8194.63	9464.71	9768.24	8676.87	1.15499	0.0687154	0.888275	0.0269349	0.916761	0.122392	1.19203	0.0486653	4	2	18.7043	Coatomer subunit zeta-1 OS=Mus musculus GN=Copz1
P40124	Cap1	39925.1	41033.2	40564.5	46489.1	43789.8	43355.7	46196.6	46040.7	45237.1	37425.3	38650.2	38849.3	40507.6	44544.9	45824.8	38308.3	1.09967	0.073783	0.835972	0.00585745	0.859992	0.0239138	1.13126	0.00844669	23	17	148.222	Adenylyl cyclase-associated protein 1 OS=Mus musculus GN=Cap1
Q9D2G2	Dlst	29463.9	30793.9	29775.8	23507.9	23751.1	23136.1	30625.1	29493	28671.5	33539.8	34795.8	31037.8	30011.2	23465	29596.5	33124.4	0.781875	0.00662314	1.1192	0.112219	1.41165	0.0226013	0.986182	0.64693	16	12	110.27	Dihydrolipoyllysine-residue succinyltransferase component of 2-oxoglutarate dehydrogenase complex, mitochondrial OS=Mus musculus GN=Dlst
P18419	Svs4	5.14266	5.45074	19.6963	0	6.34691	0	0	0	0	65.1612	28.6584	55.6873	10.0966	2.11564	0	49.8356	0.20954	0.292121	Inf	0.0842849	23.5559	0.0651738	0	0.0232872	4	2	41.0174	Seminal vesicle secretory protein 4 OS=Mus musculus GN=Svs4
P57776	Eef1d	27628.6	29197.4	29176.4	26481	26026.6	25726.2	28423.1	28066.2	28555.8	26926.9	27196.4	27742.3	28667.5	26077.9	28348.4	27288.5	0.909669	0.0478646	0.962614	0.0608854	1.04642	0.0353391	0.988869	0.645338	20	11	144.127	Elongation factor 1-delta OS=Mus musculus GN=Eef1d
Q3U1J4	Ddb1	4609.68	4937.03	4472.96	4859.07	4364.75	4412.52	4219.07	3687.12	3569.22	3836.11	3625.73	4095.68	4673.22	4545.45	3825.14	3852.51	0.972658	0.63196	1.00716	0.936432	0.847553	0.0472713	0.818522	0.077743	9	4	47.9061	DNA damage-binding protein 1 OS=Mus musculus GN=Ddb1
O35682	Myadm	657.428	801.701	669.291	696.606	730.103	660.86	879.716	801.11	846.055	593.585	653.187	605.547	709.473	695.856	842.294	617.44	0.980807	0.847071	0.733045	0.0124867	0.887309	0.0655105	1.18721	0.189385	1	1	5.6169	Myeloid-associated differentiation marker OS=Mus musculus GN=Myadm
P70388	Rad50	2466.08	2632.3	2837.26	2460.93	2620.57	2624.12	2888.84	2881.86	2369.91	3243.85	3296.44	3473.14	2645.21	2568.54	2713.54	3337.81	0.971015	0.627033	1.23006	0.0951256	1.2995	0.00536735	1.02583	0.844922	6	2	28.3365	DNA repair protein RAD50 OS=Mus musculus GN=Rad50
Q91YE8	Synpo2	554.77	418.232	619.904	604.276	637.62	654.315	540.801	594.815	593.757	672.429	453.779	495.417	530.969	632.07	576.458	540.542	1.19041	0.284194	0.937696	0.707861	0.855193	0.348804	1.08567	0.539723	10	3	55.2862	Synaptopodin-2 OS=Mus musculus GN=Synpo2
O70435	Psma3	7549.97	7540.29	7612	8743.5	8617.36	8360.03	7432.59	7382.36	7452.28	7166.78	6985.46	6789.97	7567.42	8573.63	7422.41	6980.74	1.13297	0.0258796	0.940495	0.0928116	0.81421	0.00321738	0.980838	0.00891481	12	3	70.2403	Proteasome subunit alpha type-3 OS=Mus musculus GN=Psma3
Q61739	Itga6	1605.92	1742.68	1872.37	1949.88	1706.53	1828.63	1847.01	1854.25	1844.55	1642.19	1568.69	1664.89	1740.32	1828.35	1848.6	1625.25	1.05058	0.506102	0.879181	0.0429413	0.888921	0.113018	1.06222	0.297971	11	2	67.1833	Integrin alpha-6 OS=Mus musculus GN=Itga6
Q9WTQ5	Akap12	7368.56	7964.89	7994.68	7106.99	6824.52	6923.92	4962.76	5158.84	5033.38	5703.9	5552.95	5846.59	7776.04	6951.81	5051.66	5701.15	0.894003	0.0716064	1.12857	0.0211768	0.820095	0.00300682	0.649644	0.00205257	19	4	88.0676	A-kinase anchor protein 12 OS=Mus musculus GN=Akap12
P97371	Psme1	24503.9	24076.6	23955.8	21559.5	21245.1	20233.8	26498	25644.8	25172.6	23859.7	23330.7	23499.1	24178.8	21012.8	25771.8	23563.2	0.869059	0.022352	0.9143	0.0469898	1.12137	0.0264049	1.06588	0.0165442	23	8	144.367	Proteasome activator complex subunit 1 OS=Mus musculus GN=Psme1
Q8BP92	Rcn2	1000.73	1043.87	1009.46	1038.74	1019.53	1075.2	884.098	962.462	869.03	826.528	960.323	771.391	1018.02	1044.49	905.197	852.747	1.026	0.336655	0.942057	0.542824	0.816425	0.0905272	0.889174	0.0274157	2	1	10.8913	Reticulocalbin-2 OS=Mus musculus GN=Rcn2
Q9D1J3	Sarnp	893.915	944.27	936.13	839.686	943.636	950.781	1486.24	2499.45	1644.62	1714.3	1838.22	1629.19	924.772	911.368	1876.77	1727.24	0.985506	0.802375	0.920324	0.739786	1.89521	0.00462161	2.02944	0.0433058	2	1	10.867	SAP domain-containing ribonucleoprotein OS=Mus musculus GN=Sarnp
P97742	Cpt1a	25254.3	26423.1	25283.4	15379.3	15391.1	14384.4	13453.5	13663.1	12661.6	23116.6	22099.6	21525.7	25653.6	15051.6	13259.4	22247.3	0.586724	0.001322	1.67785	0.0053395	1.47807	0.00292013	0.516865	0.000729854	11	8	79.54	Carnitine O-palmitoyltransferase 1, liver isoform OS=Mus musculus GN=Cpt1a
P70168	Kpnb1	6532.96	6537.67	6312.89	4899.04	4831.97	4801.67	6621.77	6679.63	6656.81	7006.24	6744.63	6695.68	6461.17	4844.23	6652.74	6815.52	0.749744	0.00518581	1.02447	0.303321	1.40694	0.0052124	1.02965	0.135673	11	6	65.436	Importin subunit beta-1 OS=Mus musculus GN=Kpnb1
Q9D1A2	Cndp2	14996.6	15656	15472.9	15426	14941.3	15492.8	14274.6	13938.5	13319.6	13859	14218.2	13760.9	15375.2	15286.7	13844.2	13946	0.994246	0.799954	1.00736	0.806501	0.912298	0.0117272	0.900426	0.0706742	17	9	115.99	Cytosolic non-specific dipeptidase OS=Mus musculus GN=Cndp2
P50516	Atp6v1a	1127.51	1283.67	1392.32	1185.66	1314.08	1075.07	1449.61	1538.24	1463.05	1631.31	1443.06	1466.48	1267.83	1191.61	1483.63	1513.62	0.939875	0.559176	1.02021	0.735426	1.27024	0.040842	1.17021	0.113012	2	1	11.8301	V-type proton ATPase catalytic subunit A OS=Mus musculus GN=Atp6v1a
P46460	Nsf	2579.01	2864.25	2983.88	2830	3215.85	2925.66	2223.14	2304.87	2351.1	2055.83	2117.63	2376.13	2809.05	2990.51	2293.04	2183.19	1.0646	0.397911	0.952097	0.459595	0.730041	0.0154747	0.816304	0.0176744	7	2	37.2102	Vesicle-fusing ATPase OS=Mus musculus GN=Nsf
Q02248	Ctnnb1	19317.4	18755.2	19146.7	21441.8	22529.2	24341.3	20647.1	21200.6	22605.8	18250.5	18496	18651.1	19073.1	22770.8	21484.5	18465.9	1.19387	0.0745808	0.859498	0.0660773	0.810946	0.0525493	1.12643	0.0543869	19	9	128.733	Catenin beta-1 OS=Mus musculus GN=Ctnnb1
P16045	Lgals1	24736.1	25237.7	26309.4	28313.8	27484.9	27676.7	26195.2	26013.1	26391.4	23659.6	22617.1	22860.3	25427.8	27825.1	26199.9	23045.7	1.09428	0.0397822	0.879609	0.0224944	0.828232	0.00282549	1.03037	0.193078	8	7	51.1655	Galectin-1 OS=Mus musculus GN=Lgals1
P61255	Rpl26	1865.72	1851.86	1967.77	1785.44	1803.54	1723.13	1077.86	977.477	969.253	909.454	1097.89	991.812	1895.12	1770.7	1008.2	999.719	0.934351	0.0902199	0.991592	0.92632	0.564588	0.00605814	0.531997	0.00529509	6	2	42.6891	60S ribosomal protein L26 OS=Mus musculus GN=Rpl26
Q9D819	Ppa1	24546.6	24436.6	24431.8	19253.9	17257.6	16600.6	19767	20177.3	18944	21896.3	20822.3	20904.8	24471.6	17704	19629.4	21207.8	0.723451	0.0313255	1.08041	0.0704236	1.19791	0.0506637	0.80213	0.00678047	11	7	78.799	Inorganic pyrophosphatase OS=Mus musculus GN=Ppa1
O08585	Clta	176.871	130.905	191.388	51.7337	107.015	58.184	947.784	1038.88	897.556	708.604	617.482	626.854	166.388	72.3109	961.408	650.98	0.434593	0.0418543	0.677111	0.0218913	9.00252	0.00225808	5.77812	0.00790627	10	1	67.8742	Clathrin light chain A OS=Mus musculus GN=Clta
P08113	Hsp90b1	132882	131869	129455	142745	139768	141758	160989	161699	160453	159543	158780	155819	131402	141424	161047	158047	1.07627	0.00928702	0.981373	0.164273	1.11755	0.00299607	1.22561	0.00104473	63	34	429.91	Endoplasmin OS=Mus musculus GN=Hsp90b1
Q9Z1Q5	Clic1	21426.8	21363.4	19756.3	20066	21499.1	19452	20244.4	19856	19100.5	22536.3	21827.1	21599.6	20848.8	20339.1	19733.6	21987.7	0.97555	0.624558	1.11422	0.0267246	1.08106	0.12454	0.946511	0.0411923	9	6	72.0112	Chloride intracellular channel protein 1 OS=Mus musculus GN=Clic1
P55937	Golga3	3335.68	3033.54	2865.48	3973.25	3952.81	4443.2	2931.91	3070.56	3408.67	3370.71	3561.71	3402.88	3078.23	4123.09	3137.05	3445.1	1.33943	0.0229456	1.0982	0.214449	0.835563	0.0581561	1.01911	0.848895	14	3	58.9797	Golgin subfamily A member 3 OS=Mus musculus GN=Golga3
Q99PL5	Rrbp1	25412.3	25311	26377.9	34352.7	33702.1	36028.2	30932.1	31884.7	32020.5	27998	28554.5	29341.3	25700.4	34694.3	31612.4	28631.2	1.34995	0.00825548	0.905695	0.0209912	0.825243	0.0108585	1.23004	0.00329669	57	16	347.759	Ribosome-binding protein 1 OS=Mus musculus GN=Rrbp1
Q61171	Prdx2	43896	42231	42639.2	44670.4	45138.2	45149.8	48616.6	49156.4	47928.8	44954.1	44862.3	44834.7	42922.1	44986.1	48567.2	44883.7	1.04809	0.0744411	0.924156	0.0295676	0.997723	0.629041	1.13152	0.0139097	11	7	84.7618	Peroxiredoxin-2 OS=Mus musculus GN=Prdx2
P05213	Tuba1b	112745	104647	102325	101418	103171	102142	127881	126500	117757	122705	123185	119037	106572	102244	124046	121642	0.959383	0.361425	0.980621	0.613226	1.18973	0.00669909	1.16396	0.0156886	47	17	200.972	Tubulin alpha-1B chain OS=Mus musculus GN=Tuba1b
Q7TNC4	Luc7l2	393.991	162.552	352.631	389.595	389.58	434.181	634.546	486.736	504.727	378.595	294.272	383.701	303.058	404.452	542.003	352.189	1.33457	0.346912	0.649792	0.0700707	0.870781	0.247274	1.78845	0.106555	2	1	14.4002	Putative RNA-binding protein Luc7-like 2 OS=Mus musculus GN=Luc7l2
Q791V5	Mtch2	1028.93	1011.28	956.096	1261.2	1092.33	1022.95	1275.26	1118.55	734.309	896.637	961.561	873.085	998.77	1125.49	1042.71	910.428	1.12688	0.264024	0.873138	0.57372	0.808914	0.105366	1.04399	0.916166	2	1	9.8792	Mitochondrial carrier homolog 2 OS=Mus musculus GN=Mtch2
P50396	Gdi1	15264.1	15857.5	15347.8	12502	12756	12006.2	14579.7	14542.9	13777.8	14660.4	15055.7	13715.5	15489.8	12421.4	14300.2	14477.2	0.801908	0.00469363	1.01238	0.778213	1.1655	0.0325214	0.923196	0.0479059	21	6	164.137	Rab GDP dissociation inhibitor alpha OS=Mus musculus GN=Gdi1
Q9R0P5	Dstn	104632	103614	105900	97048.6	93164.4	95627.3	126541	127098	125279	110230	108362	110740	104715	95280.1	126306	109777	0.909896	0.015502	0.869139	0.00346415	1.15215	0.00464791	1.20618	0.00314673	24	17	168.494	Destrin OS=Mus musculus GN=Dstn
Q6WVG3	Kctd12	5700.82	5899.35	5752.06	5121.34	5348.99	5742.99	6563.4	6981.44	7105.13	6974.64	7788.16	7299.5	5784.08	5404.44	6883.32	7354.1	0.934366	0.21239	1.06839	0.254905	1.36075	0.0101216	1.19005	0.0136345	9	4	53.7968	BTB/POZ domain-containing protein KCTD12 OS=Mus musculus GN=Kctd12
P61407	Tdrd6	1090.2	952.396	1084.78	785.373	877.019	655.717	516.255	716.4	779.405	678.611	751.849	609.069	1042.46	772.703	670.687	679.843	0.741232	0.0583429	1.01365	0.94325	0.879825	0.346989	0.643371	0.0909153	3	1	13.3003	Tudor domain-containing protein 6 OS=Mus musculus GN=Tdrd6
P01872	Ighm	9468.5	9061.26	9172.4	15395.3	15525.4	15774.4	14485.4	14979.2	14111.4	10817.1	10667.9	11050.3	9234.05	15565	14525.3	10845.1	1.68561	0.000771794	0.746635	0.0107426	0.696761	0.000410315	1.57302	0.0030203	9	4	61.9752	Ig mu chain C region OS=Mus musculus GN=Ighm
Q6PIC6	Atp1a3	2538.8	2052.97	1877.64	2315.64	2384.8	1785.71	1465.62	1672.54	1645.67	1989.92	2001.87	1906.97	2156.47	2162.05	1594.61	1966.25	1.00259	0.987799	1.23306	0.043582	0.909439	0.452148	0.739453	0.148699	37	1	251.925	Sodium/potassium-transporting ATPase subunit alpha-3 OS=Mus musculus GN=Atp1a3
O08579	Emd	1097.36	1213.82	1218.72	1368.59	1142.81	1274	1250.04	1050.97	1291.03	956.594	1057.66	1156.23	1176.63	1261.8	1197.34	1056.83	1.07238	0.399583	0.882644	0.28391	0.837555	0.105957	1.0176	0.875064	2	1	12.5807	Emerin OS=Mus musculus GN=Emd
Q80WK2	Slc51b	5069.83	4995.63	4879.21	2580.35	2166.01	2164.32	4486.3	4293.88	3919.38	4556.18	4678.79	3996.49	4981.56	2303.56	4233.19	4410.49	0.462418	0.00587957	1.04188	0.618432	1.91464	0.00746977	0.849772	0.0291408	4	3	25.0711	Organic solute transporter subunit beta OS=Mus musculus GN=Slc51b
O70475	Ugdh	108866	110701	109784	125741	122822	124043	114415	114678	113400	119923	117792	120858	109784	124202	114164	119524	1.13133	0.00416062	1.04695	0.0429679	0.962335	0.0339753	1.0399	0.0181987	31	19	225.825	UDP-glucose 6-dehydrogenase OS=Mus musculus GN=Ugdh
P07356	Anxa2	204860	206395	206885	214245	210316	214876	239931	241588	238836	219524	217852	220950	206047	213146	240118	219442	1.03445	0.0478136	0.913891	0.00339339	1.02954	0.0441413	1.16536	0.000945602	39	24	309.364	Annexin A2 OS=Mus musculus GN=Anxa2
Q9CQM9	Glrx3	2925.15	2811.93	2592.99	3521.08	3132.94	3313	3090.73	2920.33	3197.76	2035.06	2160.28	2490.84	2776.69	3322.34	3069.61	2228.73	1.19651	0.0442959	0.726063	0.0337647	0.67083	0.0107548	1.10549	0.206166	7	2	44.4869	Glutaredoxin-3 OS=Mus musculus GN=Glrx3
Q61792	Lasp1	43876.3	44565.1	43194.5	46374.9	47032.5	46644.1	54618.7	55016.9	54012.1	49637.5	50518	49026.6	43878.6	46683.8	54549.2	49727.4	1.06393	0.0234382	0.911605	0.0108026	1.06519	0.020656	1.24318	0.000296677	18	16	132.196	LIM and SH3 domain protein 1 OS=Mus musculus GN=Lasp1
Q62417	Sorbs1	419.86	345.333	350.258	169.15	165.116	69.9458	140.743	132.271	79.1846	348.519	260.561	253.415	371.817	134.737	117.4	287.498	0.362375	0.0178313	2.44889	0.0393133	2.13377	0.0434651	0.315746	0.0175229	7	1	30.0698	Sorbin and SH3 domain-containing protein 1 OS=Mus musculus GN=Sorbs1
P56480	Atp5b	469468	462971	463867	376991	385762	387779	414471	415112	416100	439607	440376	422221	465435	383511	415228	434068	0.823983	0.00232381	1.04537	0.137189	1.13183	0.0115461	0.892127	0.00209754	66	48	359.783	ATP synthase subunit beta, mitochondrial OS=Mus musculus GN=Atp5b
Q62188	Dpysl3	14442.3	15089.4	14882	15324.7	15534.4	15442.5	15925	15730.4	15540.6	15886.8	15801.7	14992	14804.6	15433.9	15732	15560.2	1.0425	0.10742	0.989078	0.6808	1.00819	0.736029	1.06265	0.0807127	19	4	110.37	Dihydropyrimidinase-related protein 3 OS=Mus musculus GN=Dpysl3
P14602	Hspb1	4858.13	4709.54	4448.45	6060.33	6196.56	6350.91	4985.93	5158.96	5587.08	4439.35	4548.9	5184.84	4672.04	6202.6	5243.99	4724.37	1.3276	0.00589666	0.900911	0.221711	0.761675	0.0279004	1.12242	0.192966	5	3	27.3918	Heat shock protein beta-1 OS=Mus musculus GN=Hspb1
Q99K30	Eps8l2	1907.97	1811.37	1830.66	2338.68	2532.13	2092.8	1997.11	2100.03	2104.04	1806.27	2000.33	2050.59	1850	2321.2	2067.06	1952.4	1.2547	0.0947176	0.944527	0.335825	0.841114	0.108149	1.11733	0.0771033	5	2	22.432	Epidermal growth factor receptor kinase substrate 8-like protein 2 OS=Mus musculus GN=Eps8l2
P08553	Nefm	597.125	846.529	631.863	152.971	172.53	153.183	470.126	435.995	322.978	1276.23	1126.2	1079.25	691.839	159.561	409.7	1160.56	0.230634	0.041579	2.83271	0.00845997	7.27344	0.00965231	0.59219	0.0667185	24	2	159.914	Neurofilament medium polypeptide OS=Mus musculus GN=Nefm
Q99MN1	Kars	15373	15676.1	15998.7	17730.1	17970.4	18239.1	16083.7	16600	16139.3	15303.7	15147.4	14934.8	15682.6	17979.9	16274.3	15128.6	1.14648	0.00558409	0.9296	0.025535	0.84142	0.0018357	1.03773	0.126126	20	7	140.741	Lysine--tRNA ligase OS=Mus musculus GN=Kars
P23591	Tsta3	5328.12	5210.8	4521.18	3627.52	3693.35	3519.46	3943.64	4455.6	3451.64	5423.91	5735.52	4932.73	5020.03	3613.44	3950.29	5364.05	0.719805	0.0513343	1.35789	0.0506185	1.48447	0.0263568	0.786907	0.031208	8	3	64.7056	GDP-L-fucose synthase OS=Mus musculus GN=Tsta3
O35658	C1qbp	17565.2	16628.1	14972.7	11859.5	11054	9567.24	13855.5	13775.7	11595.8	19624.6	21436.1	15515.7	16388.7	10826.9	13075.7	18858.8	0.660634	0.0182551	1.44228	0.109757	1.74185	0.0492854	0.79785	0.00776092	7	3	60.1125	Complement component 1 Q subcomponent-binding protein, mitochondrial OS=Mus musculus GN=C1qbp
Q9CR57	Rpl14	1441.59	1538.03	1575.68	866.055	813.959	750.379	220.633	317.39	225.982	418.587	357.679	384.708	1518.43	810.131	254.668	386.992	0.533532	0.0030483	1.51959	0.0672858	0.47769	0.00599949	0.167718	0.00385584	1	1	6.4967	60S ribosomal protein L14 OS=Mus musculus GN=Rpl14
Q9D0I9	Rars	29840.2	30387.4	30371.9	34294.1	37586.4	44364.7	40137.8	44025.1	38136.9	31491.5	34219.3	32050.8	30199.8	38748.4	40766.6	32587.2	1.28307	0.145022	0.799361	0.0580905	0.840996	0.201491	1.34989	0.0186459	26	4	130.141	Arginine--tRNA ligase, cytoplasmic OS=Mus musculus GN=Rars
P63323	Rps12	21677.5	20358.1	21286	27080.4	28004.6	27911.2	29857.6	29352.1	29453.5	21250.6	21326.2	22240.8	21107.2	27665.4	29554.4	21605.9	1.31071	0.00373216	0.731056	0.00551699	0.780972	0.00178451	1.4002	0.00185575	8	6	54.9792	40S ribosomal protein S12 OS=Mus musculus GN=Rps12
P47962	Rpl5	32120.7	32328.7	32990.3	31835.6	31862	32809.7	37690.4	37834	39116.7	32898.8	32667.4	32296.4	32479.9	32169.1	38213.7	32620.9	0.990431	0.554711	0.853644	0.0155758	1.01404	0.346989	1.17653	0.000603258	15	10	92.9837	60S ribosomal protein L5 OS=Mus musculus GN=Rpl5
Q6P9L6	Kif15	1423.13	1377.11	1191.71	1894.94	2108.21	1765.71	1347.06	1403.56	1509.34	1534.65	1235.56	1250.79	1330.65	1922.95	1419.99	1340.33	1.44512	0.0274239	0.943904	0.590689	0.697019	0.0261522	1.06714	0.524551	4	2	15.6309	Kinesin-like protein KIF15 OS=Mus musculus GN=Kif15
P51125	Cast	1708.53	1769.58	1482.25	1587.46	1735.34	1577.55	1420.89	1612.37	1330.91	2144.87	1832.47	1858.74	1653.46	1633.45	1454.72	1945.36	0.987901	0.887671	1.33727	0.0506185	1.19095	0.0947826	0.879809	0.045363	8	2	44.223	Calpastatin OS=Mus musculus GN=Cast
A2A935	Prdm16	8227.33	9335.52	10311.2	9866.66	11208.5	12119.3	18416.8	20288.1	21917.9	19287.8	19907.2	21305.5	9291.36	11064.8	20207.6	20166.8	1.19087	0.163316	0.997981	0.978133	1.82261	0.00321738	2.17488	0.00037018	10	5	40.3543	PR domain zinc finger protein 16 OS=Mus musculus GN=Prdm16
Q9R0Q7	Ptges3	908.174	939.099	1018.3	1554.82	1295.57	1389.41	1115.53	1299.99	1079.93	937.531	879.636	1063.49	955.191	1413.26	1165.15	960.22	1.47956	0.0333915	0.824118	0.132512	0.679434	0.0217683	1.21981	0.125417	4	1	29.326	Prostaglandin E synthase 3 OS=Mus musculus GN=Ptges3
P63038	Hspd1	191186	188917	185264	185038	187543	184774	195106	198272	194573	191958	193184	184779	188456	185785	195984	189974	0.985828	0.321045	0.969335	0.198817	1.02255	0.288972	1.03995	0.0535917	47	29	367.297	60 kDa heat shock protein, mitochondrial OS=Mus musculus GN=Hspd1
Q9DBG3	Ap2b1	8264	8430.06	8423.55	7888.7	7511.92	7806.58	8094.9	8165.95	8023.79	8128.13	7879.83	7387.83	8372.54	7735.74	8094.88	7798.6	0.923942	0.0367036	0.963399	0.38303	1.00813	0.836031	0.966837	0.0534391	15	6	92.3728	AP-2 complex subunit beta OS=Mus musculus GN=Ap2b1
Q9JKV1	Adrm1	442.662	442.343	554.66	516.902	534.366	632.377	1157.05	1045.03	1158.75	918.471	1030.36	1074.72	479.888	561.215	1120.28	1007.85	1.16947	0.24639	0.899645	0.200191	1.79584	0.00746977	2.33445	0.00572713	1	1	6.1802	Proteasomal ubiquitin receptor ADRM1 OS=Mus musculus GN=Adrm1
P10639	Txn	76603.8	75803.1	75669.2	95746.4	88200.9	87880.4	100869	100035	99137.4	86790	84517.8	85636.2	76025.4	90609.2	100014	85648	1.19183	0.0538927	0.856362	0.00369945	0.945246	0.224919	1.31553	6.10948e-05	23	18	42.2516	Thioredoxin OS=Mus musculus GN=Txn
O09061	Psmb1	3822.85	4046.16	4180.3	2664.95	2562.14	2692.3	2248.1	1322.17	1310.72	2707.09	2698.68	2865.65	4016.44	2639.8	1627	2757.14	0.657248	0.0105027	1.69462	0.109581	1.04445	0.197781	0.405084	0.0439629	3	1	16.7228	Proteasome subunit beta type-1 OS=Mus musculus GN=Psmb1
P16627	Hspa1l	1697.38	1751.43	1917.66	1676.9	1790.54	1908.81	1628.92	1289.68	1859.07	1507.24	1441.72	1266.43	1788.82	1792.08	1592.56	1405.13	1.00182	0.981733	0.88231	0.45778	0.784078	0.030495	0.890283	0.296363	30	1	180.94	Heat shock 70 kDa protein 1-like OS=Mus musculus GN=Hspa1l
Q921H8	Acaa1a	2601.13	2511.13	2502.95	2609.17	2597.91	2625.61	1487.58	1486.49	1591.57	2882.62	2799.15	3068.87	2538.4	2610.9	1521.88	2916.88	1.02856	0.188859	1.91663	0.00866443	1.11719	0.0838044	0.599543	0.00370081	7	1	57.5178	3-ketoacyl-CoA thiolase A, peroxisomal OS=Mus musculus GN=Acaa1a
Q9Z1P6	Ndufa7	5561.91	5955.59	6115.31	4753.1	4826.63	4486.52	6120.37	6233.46	6345.01	5916.97	5836.91	6537.68	5877.61	4688.75	6232.95	6097.19	0.797731	0.0194489	0.978219	0.673213	1.30039	0.0236144	1.06046	0.083449	7	5	36.377	NADH dehydrogenase [ubiquinone] 1 alpha subcomplex subunit 7 OS=Mus musculus GN=Ndufa7
P68254	Ywhaq	21874.4	21339.8	21743.1	18573.4	19823.1	18952.9	20670.6	20868.5	18798.6	28339.2	27920.4	26685.3	21652.4	19116.5	20112.6	27648.3	0.882879	0.0270922	1.37468	0.00977514	1.44631	0.00226408	0.928883	0.178405	29	4	205.072	14-3-3 protein theta OS=Mus musculus GN=Ywhaq
Q80SW1	Ahcyl1	2563.6	2636.66	2508.86	2863.71	2793.01	2911.15	4022.25	4195.83	4120.77	3699.47	3123.12	3263.79	2569.71	2855.96	4112.95	3362.13	1.11139	0.0166955	0.817448	0.0785712	1.17723	0.123653	1.60055	0.000826835	12	4	63.8064	Putative adenosylhomocysteinase 2 OS=Mus musculus GN=Ahcyl1
Q8K1M6	Dnm1l	2104.61	2215.79	2087.99	1155.47	1267.84	971.174	1430.92	1568.4	1296.99	2107.73	1912.75	1842.3	2136.13	1131.49	1432.1	1954.26	0.529694	0.0105027	1.36461	0.0314641	1.72715	0.0078691	0.670421	0.00907901	10	3	39.3414	Dynamin-1-like protein OS=Mus musculus GN=Dnm1l
Q64531	Hprt1	10152.6	9305.11	9149.65	10161.6	10413.9	10599	10329.2	10113.7	10083.2	9973.18	9998.99	9103.27	9535.77	10391.5	10175.4	9691.81	1.08974	0.138263	0.952478	0.311644	0.932667	0.15919	1.06707	0.116063	3	3	20.8507	Hypoxanthine-guanine phosphoribosyltransferase (Fragment) OS=Mus spretus GN=Hprt1
Q6RT24	Cenpe	7284.57	7111.65	7297.9	5261.29	5387.51	4993.88	2540.71	2809	2457.54	4606.61	4348.72	4414.38	7231.38	5214.23	2602.42	4456.57	0.721056	0.00506452	1.71247	0.00555029	0.854695	0.0181241	0.359879	0.00222803	38	6	168.027	Centromere-associated protein E OS=Mus musculus GN=Cenpe
Q8CGB6	Tns2	916.602	831.015	874.946	885.523	1141.29	1113.93	853.458	930.401	1014.48	659.451	652.593	667.483	874.188	1046.91	932.778	659.842	1.19759	0.208958	0.707395	0.0600134	0.630274	0.0607939	1.06702	0.451081	7	1	35.9283	Tensin-like C1 domain-containing phosphatase OS=Mus musculus GN=Tenc1
Q9WVE8	Pacsin2	5371.46	5300.27	5344.49	5436.16	5026.33	5339.17	6471.14	6137.78	6275.17	5774.68	5657.57	5997.82	5338.74	5267.22	6294.7	5810.02	0.986604	0.678839	0.923003	0.0576899	1.10305	0.0457599	1.17906	0.0049247	7	4	42.7616	Protein kinase C and casein kinase substrate in neurons protein 2 OS=Mus musculus GN=Pacsin2
Q60865	Caprin1	8547.74	9303.49	9004.18	10637.1	10319.7	9449.97	11453.3	11159.5	10742.9	10355.8	9531.77	10898.9	8951.8	10135.6	11118.6	10262.1	1.13224	0.0936103	0.922973	0.217035	1.01249	0.841758	1.24205	0.0290575	10	6	67.726	Caprin-1 OS=Mus musculus GN=Caprin1
Q9ERN0	Scamp2	747.571	745.833	637.467	23.1497	0	0	0	0	25.2634	575.196	429.451	464.54	710.29	7.71658	8.42112	489.729	0.010864	0.00928702	58.1548	0.0255263	63.4645	0.016026	0.0118559	0.048524	1	1	5.3604	Secretory carrier-associated membrane protein 2 OS=Mus musculus GN=Scamp2
Q9Z0X1	Aifm1	28212.7	28138.5	26644.4	23209.7	22757.1	22004.8	28784.1	28470.7	27156.6	29877.6	29184.9	27547.8	27665.2	22657.2	28137.1	28870.1	0.818979	0.00972333	1.02605	0.521356	1.27421	0.0113939	1.01706	0.0230722	16	9	115.87	Apoptosis-inducing factor 1, mitochondrial OS=Mus musculus GN=Aifm1
O08553	Dpysl2	13656.2	13763.6	13021.2	10953	10824.7	10349.6	13505.3	13036.4	11605.4	12104.7	11796.6	11546.2	13480.3	10709.1	12715.7	11815.8	0.794423	0.00621531	0.92923	0.325494	1.10335	0.0223031	0.943279	0.184277	22	6	137.823	Dihydropyrimidinase-related protein 2 OS=Mus musculus GN=Dpysl2
P51174	Acadl	30957.6	30205.2	29549.8	29790.3	30116.4	29220.8	31939.2	31502.9	30048	35031.6	35241.5	35036	30237.5	29709.2	31163.4	35103	0.982526	0.403912	1.12642	0.0479121	1.18156	0.0056338	1.03062	0.0550113	19	10	116.928	Long-chain specific acyl-CoA dehydrogenase, mitochondrial OS=Mus musculus GN=Acadl
Q61390	Cct6b	114.684	117.806	61.7846	77.8404	41.9079	43.4323	224.81	315.943	123.423	620.892	666.274	443.39	98.0914	54.3935	221.392	576.852	0.554519	0.173145	2.60557	0.0443507	10.6052	0.0267502	2.257	0.0163537	8	1	39.7555	T-complex protein 1 subunit zeta-2 OS=Mus musculus GN=Cct6b
P20108	Prdx3	12373.2	12377	12463.6	14151.6	13415.7	13764	15132.4	16325.6	15694	13433.4	13439.5	13364.8	12404.6	13777.1	15717.3	13412.6	1.11064	0.0434925	0.853361	0.0514416	0.973541	0.26834	1.26706	0.00857072	8	4	59.5745	Thioredoxin-dependent peroxide reductase, mitochondrial OS=Mus musculus GN=Prdx3
P08122	Col4a2	1578.97	1505.3	1777.6	1923.04	1708.88	1807.5	2405.17	1641.24	1154.57	1585.43	1812.97	2611.51	1620.62	1813.14	1733.66	2003.3	1.11879	0.185865	1.15553	0.670458	1.10488	0.648752	1.06975	0.928152	11	2	55.5263	Collagen alpha-2(IV) chain OS=Mus musculus GN=Col4a2
P97792	Cxadr	4284.72	4464.02	4533.65	4095.14	4108.13	3839.43	3983.77	3602.1	3873.08	4314.22	4383.99	4045.45	4427.47	4014.23	3819.65	4247.89	0.906666	0.0469513	1.11211	0.0907169	1.05821	0.196349	0.862717	0.0691686	3	2	21.8938	Coxsackievirus and adenovirus receptor homolog OS=Mus musculus GN=Cxadr
P46471	Psmc2	7748.52	8189.51	7610.52	7002.94	6932.36	7014.29	7103.35	6952.19	6387.83	7023.92	7237.74	6964.69	7849.52	6983.2	6814.46	7075.45	0.889634	0.0649822	1.0383	0.432951	1.01321	0.425882	0.868137	0.0360427	16	7	97.4354	26S protease regulatory subunit 7 OS=Mus musculus GN=Psmc2
Q61879	Myh10	22277.9	21386.6	22485.6	24300.2	24711.2	25790.5	24005.8	23443.6	23150.4	26309.1	27022.9	27124.8	22050.1	24933.9	23533.3	26818.9	1.13079	0.0228114	1.13962	0.00845997	1.0756	0.0488916	1.06726	0.0733518	101	15	629.73	Myosin-10 OS=Mus musculus GN=Myh10
Q91Z83	Myh7	356.178	385.686	361.837	154.793	174.645	159.252	292.246	315.591	231.24	236.234	268.607	199.874	367.9	162.897	279.692	234.905	0.442774	0.00232381	0.839869	0.311644	1.44205	0.0812327	0.76024	0.0765102	11	1	51.4439	Myosin-7 OS=Mus musculus GN=Myh7
O35887	Calu	19294.5	18781	18341.6	17077.2	17403.6	17689	22767.5	21969.7	21538.2	21058.8	20245.8	20287.1	18805.7	17389.9	22091.8	20530.6	0.924714	0.037485	0.929331	0.0623903	1.1806	0.00513578	1.17474	0.000244008	16	9	112.681	Calumenin OS=Mus musculus GN=Calu
Q3TJD7	Pdlim7	5010.95	5215.44	4968.05	5866.38	6118.87	6540.5	6149.23	5616.37	6039.59	5164.38	4990.37	5167.66	5064.82	6175.25	5935.06	5107.47	1.21924	0.0401687	0.860559	0.0580905	0.827088	0.0403012	1.17182	0.0641284	4	2	19.4069	PDZ and LIM domain protein 7 OS=Mus musculus GN=Pdlim7
Q60854	Serpinb6	74068.6	72961.4	71453.9	55980	55985.5	54486.2	83689.7	83506.2	80834.2	78210.7	78223.1	76056.1	72828	55483.9	82676.7	77496.7	0.761848	0.00232381	0.937346	0.0378332	1.39674	0.000875601	1.13523	0.00104343	27	20	242.218	Serpin B6 OS=Mus musculus GN=Serpinb6
Q9CR16	Ppid	21376.1	20246.4	20624.1	23667.8	25379.3	25540	20095.5	19883.5	20908.6	19916.3	19204.1	20528.9	20748.8	24862.4	20295.9	19883.1	1.19825	0.0229456	0.979663	0.529739	0.799728	0.010851	0.978169	0.419566	14	7	86.3351	Peptidyl-prolyl cis-trans isomerase D OS=Mus musculus GN=Ppid
Q80VA0	Galnt7	1317.72	1068.73	1123.95	958.492	905.071	903.186	1585.24	1471.32	1403.82	1697.6	1634.68	1462.81	1170.13	922.25	1486.79	1598.36	0.788158	0.113503	1.07504	0.353785	1.73311	0.0170398	1.27062	0.0264221	11	2	59.5664	N-acetylgalactosaminyltransferase 7 OS=Mus musculus GN=Galnt7
P34022	Ranbp1	491.098	495.406	435.956	707.203	730.723	721.995	781.131	723.57	704.806	719.13	771.215	760.519	474.153	719.974	736.502	750.288	1.51844	0.0114308	1.01872	0.707861	1.0421	0.224833	1.5533	0.00505856	2	1	12.6253	Ran-specific GTPase-activating protein OS=Mus musculus GN=Ranbp1
Q8QZT1	Acat1	52231.2	51530.2	51453.2	47472.7	51187.9	50823.3	58643.2	56761	57444.1	45553.5	45174.8	47612.8	51738.2	49828	57616.1	46113.7	0.963079	0.303101	0.800362	0.00622043	0.925459	0.0924961	1.11361	0.00276672	20	11	143.831	Acetyl-CoA acetyltransferase, mitochondrial OS=Mus musculus GN=Acat1
P11725	Otc	358.571	404.414	247.385	461.266	478.759	394.284	236.449	302.097	194.477	398.284	413.249	220.512	336.79	444.77	244.341	344.015	1.32061	0.179801	1.40793	0.321025	0.773468	0.282676	0.7255	0.0261835	7	1	43.6425	Ornithine carbamoyltransferase, mitochondrial OS=Mus musculus GN=Otc
Q6P8U6	Pnlip	6.2469	34.1051	7.98082	337.848	340.298	309.43	53.554	89.4799	38.6051	516.487	467.289	488.585	16.1109	329.192	60.5463	490.787	20.4328	0.000962008	8.10597	0.00281023	1.49088	0.00546657	3.75809	0.0444029	2	1	14.5526	Pancreatic triacylglycerol lipase OS=Mus musculus GN=Pnlip
Q64518	Atp2a3	7842.84	8133.07	8557.46	8248.5	8245.37	7776.4	10094.7	9749.06	10141.7	9580.88	9361.61	9976.16	8177.79	8090.09	9995.16	9639.55	0.989275	0.800322	0.964422	0.257199	1.19153	0.00943726	1.22223	0.0160951	27	4	163.705	Sarcoplasmic/endoplasmic reticulum calcium ATPase 3 OS=Mus musculus GN=Atp2a3
Q8BMJ2	Lars	473.292	502.291	485.121	540.977	525.594	475.923	567.182	498.838	491.015	325.263	460.462	494.86	486.901	514.165	519.012	426.862	1.05599	0.358951	0.822451	0.281435	0.830204	0.268722	1.06595	0.407879	4	1	16.3383	Leucine--tRNA ligase, cytoplasmic OS=Mus musculus GN=Lars
P57780	Actn4	123949	122966	121169	117408	113839	113895	126037	125494	120120	127319	122951	122561	122695	115047	123884	124277	0.937666	0.0229456	1.00317	0.907108	1.08023	0.0211062	1.00969	0.40952	69	25	502	Alpha-actinin-4 OS=Mus musculus GN=Actn4
O88456	Capns1	5863.49	5967.3	6134.4	5883.38	5294.26	5250.6	5268.83	5608.8	5392.32	4487.47	4573.7	4648.61	5988.4	5476.08	5423.32	4569.92	0.914449	0.160786	0.842644	0.0225652	0.834524	0.0611757	0.905638	0.0372321	6	3	29.7564	Calpain small subunit 1 OS=Mus musculus GN=Capns1
Q78IK4	Apool	2986.41	2584.83	2682.81	2620.76	2574.29	2874.55	3530.25	3657.2	3201.61	2536.08	2864.72	2715.45	2751.35	2689.86	3463.02	2705.42	0.977652	0.758765	0.78123	0.0383423	1.00578	0.923449	1.25866	0.058657	6	3	39.626	Apolipoprotein O-like OS=Mus musculus GN=Apool
O09117	Sypl1	11502.4	11767.7	12776.9	9878.5	9514.93	10026.7	12527.6	12536.6	12626.1	12745.6	12828	13119.5	12015.7	9806.72	12563.4	12897.7	0.816161	0.0394531	1.02661	0.141872	1.31519	0.00178383	1.04559	0.26144	7	5	46.3126	Synaptophysin-like protein 1 OS=Mus musculus GN=Sypl1
Q9JKA5	Gpa33	19081.9	18539.3	19547.4	15956.4	15492.9	15328	16577.8	16576	17091.4	22558.7	22801.7	22990.8	19056.2	15592.4	16748.4	22783.8	0.818233	0.0070606	1.36036	0.00216793	1.46121	0.000657205	0.878893	0.00453009	7	6	54.421	Cell surface A33 antigen OS=Mus musculus GN=Gpa33
Q8R3B1	Plcd1	6614.5	6306.06	6518.33	4889.51	4463.52	4365.59	4260.05	4498.41	3977.09	7081.74	7288.45	6982.81	6479.63	4572.87	4245.18	7117.67	0.70573	0.00817116	1.67665	0.00577314	1.5565	0.00362903	0.655158	0.0114811	3	2	14.2045	1-phosphatidylinositol 4,5-bisphosphate phosphodiesterase delta-1 OS=Mus musculus GN=Plcd1
Q8CIN4	Pak2	8943.77	8871.04	9593.01	10561.7	11137.8	10712.6	9254.86	9010.5	8684.44	8726.74	8710.5	8520.2	9135.94	10804.1	8983.27	8652.48	1.18259	0.0179687	0.963177	0.240517	0.800854	0.00867248	0.983289	0.730156	9	3	52.4245	Serine/threonine-protein kinase PAK 2 OS=Mus musculus GN=Pak2
Q3UPL0	Sec31a	11305.4	10518.4	10565.5	10864.2	11921.8	11112.5	10429.9	10115.9	10103.1	10593.9	10856.8	10443.2	10796.4	11299.5	10216.3	10631.3	1.0466	0.346854	1.04062	0.108302	0.940863	0.196076	0.946266	0.0520455	14	9	79.2299	Protein transport protein Sec31A OS=Mus musculus GN=Sec31a
Q8C522	Endod1	1550.07	1301.64	1629.1	2066.22	2228.86	1940.75	1680.42	1574.74	1814.68	1800.69	1915.93	1769.3	1493.6	2078.61	1689.95	1828.64	1.39168	0.0281337	1.08207	0.249258	0.879741	0.101695	1.13146	0.0619146	3	2	20.8334	Endonuclease domain-containing 1 protein OS=Mus musculus GN=Endod1
Q3UHX2	Pdap1	5552.28	4841.51	5328.17	6339.93	6530.85	6031.39	6760.46	6517.13	7402.19	4867.28	4677.03	5074.79	5240.66	6300.72	6893.26	4873.03	1.20228	0.0384392	0.706927	0.0278983	0.773408	0.00712524	1.31534	0.0203726	7	2	34.7877	28 kDa heat- and acid-stable phosphoprotein OS=Mus musculus GN=Pdap1
Q60692	Psmb6	5187.51	5076.96	5456.86	6410.14	5831.1	6286.12	4530.9	5003.24	4743.61	4495.01	4476.77	4928.21	5240.44	6175.79	4759.25	4633.33	1.17848	0.0348134	0.973542	0.635046	0.750241	0.00902414	0.908177	0.142679	7	2	58.7357	Proteasome subunit beta type-6 OS=Mus musculus GN=Psmb6
P97822	Anp32e	2422.94	2559.94	2242.5	2776.52	2841.59	2519.59	2427.23	2575.59	2248.31	2003.06	2012.96	1850.18	2408.46	2712.57	2417.05	1955.4	1.12627	0.128375	0.809003	0.0522676	0.720866	0.0147391	1.00356	0.119439	3	1	12.7286	Acidic leucine-rich nuclear phosphoprotein 32 family member E OS=Mus musculus GN=Anp32e
Q8CGK3	Lonp1	4887.09	4914.06	4918.31	4654.02	4366.01	4164.69	5224.31	4841.96	4112.53	5111.63	5752.33	4484.38	4906.49	4394.91	4726.27	5116.11	0.895734	0.106022	1.08248	0.546531	1.1641	0.214192	0.963269	0.617235	15	5	69.5599	Lon protease homolog, mitochondrial OS=Mus musculus GN=Lonp1
P49817	Cav1	16059.1	16046.8	16385.1	18690.4	18423.9	18158.6	19458	20390.8	21508.2	15939.7	15835.7	16475.6	16163.7	18424.3	20452.3	16083.7	1.13986	0.00451508	0.786399	0.0348867	0.87296	0.00464791	1.26532	0.0096862	9	6	73.1944	Caveolin-1 OS=Mus musculus GN=Cav1
Q7TNV0	Dek	934.113	996.229	881.254	459.817	606.413	448.354	879.356	563.805	380.484	867.512	800.879	793.486	937.199	504.861	607.882	820.626	0.538692	0.0137385	1.34998	0.356086	1.62545	0.0249438	0.648616	0.165262	4	1	21.3715	Protein DEK OS=Mus musculus GN=Dek
Q9QYJ0	Dnaja2	9987.57	10097.1	10081.7	9687.91	10168.1	10027.8	9857.02	9587.09	9795.35	9003.36	9630.84	9183.91	10055.4	9961.24	9746.49	9272.7	0.990632	0.636381	0.951389	0.168016	0.930878	0.0676936	0.969275	0.108428	10	7	59.3994	DnaJ homolog subfamily A member 2 OS=Mus musculus GN=Dnaja2
Q9R1P3	Psmb2	4247.24	4409.36	4508.88	5249.74	5519.33	5444.29	4472.23	4481.18	4655.85	4114.14	3856.6	4113.28	4388.49	5404.45	4536.42	4028.01	1.2315	0.00587957	0.887926	0.0344289	0.745313	0.00247461	1.03371	0.0832391	2	2	17.7031	Proteasome subunit beta type-2 OS=Mus musculus GN=Psmb2
Q61789	Lama3	1050.27	960.501	1029.94	1169.85	1439.05	1297.65	1163.29	1154.73	1044.67	1103.72	1196.1	1115.43	1013.57	1302.18	1120.9	1138.42	1.28475	0.0865478	1.01563	0.780953	0.87424	0.194382	1.10589	0.177959	3	2	10.684	Laminin subunit alpha-3 OS=Mus musculus GN=Lama3
Q9CXW4	Rpl11	285.4	215.273	330.321	299.929	337.985	291.491	261.863	283.851	127.799	158.931	164.638	197.46	276.998	309.802	224.504	173.676	1.11843	0.500238	0.773598	0.485219	0.560604	0.00756839	0.810492	0.558533	5	1	24.4644	60S ribosomal protein L11 OS=Mus musculus GN=Rpl11
Q9WUZ9	Entpd5	3792.45	3566.3	2591.05	2263.98	2264.08	1803.65	1703.02	1618.68	1183.03	2851.07	2728.42	2363.86	3316.6	2110.57	1501.58	2647.78	0.636364	0.102533	1.76333	0.0250899	1.25454	0.0886597	0.452746	3.77945e-05	4	2	22.9163	Ectonucleoside triphosphate diphosphohydrolase 5 OS=Mus musculus GN=Entpd5
Q9R1P4	Psma1	4592.36	4381.37	4705.31	4731.12	4851.06	4769.87	5404.98	5645.86	5781.42	4402.38	4439.08	5038.57	4559.68	4784.02	5610.76	4626.68	1.0492	0.17731	0.824608	0.0551194	0.967111	0.569293	1.23052	0.0155451	9	3	58.7325	Proteasome subunit alpha type-1 OS=Mus musculus GN=Psma1
Q01853	Vcp	42755.3	40071.3	39597	38047.8	37592.5	36787.1	43740.9	41994.4	42161.6	46637.5	45968.7	45975.4	40807.9	37475.8	42632.3	46193.9	0.918347	0.098928	1.08354	0.0390684	1.23263	0.00178451	1.04471	0.062821	29	19	199.448	Transitional endoplasmic reticulum ATPase OS=Mus musculus GN=Vcp
Q9D8S3	Arfgap3	245.885	254.869	331.277	378.85	368.854	322.69	358.34	473.167	305.518	403.021	334.251	300.258	277.344	356.798	379.008	345.843	1.28648	0.120903	0.912495	0.670458	0.969297	0.797456	1.36657	0.275664	2	1	9.8515	ADP-ribosylation factor GTPase-activating protein 3 OS=Mus musculus GN=Arfgap3
Q02257	Jup	4625.62	4913.15	4769.2	5541.1	5494.93	5521.56	4323.13	4397.93	4356.99	4517.02	4052.85	4498.62	4769.32	5519.2	4359.35	4356.16	1.15723	0.0268121	0.999269	0.987536	0.789275	0.0290295	0.91404	0.0188024	9	3	51.019	Junction plakoglobin OS=Mus musculus GN=Jup
Q8CJ40	Crocc	1414.4	1646.71	1552.01	1816.15	1742.93	1823.72	1218.58	1560.52	1539.47	1380.31	1491.81	1045.96	1537.71	1794.27	1439.52	1306.03	1.16685	0.0804136	0.907265	0.560878	0.727889	0.0869084	0.936148	0.232408	12	3	55.8412	Rootletin OS=Mus musculus GN=Crocc
Q9D855	Uqcrb	22296.6	22423.6	21779.4	22088.5	20440.4	20847	22801.6	23745.1	22511.6	21663	20907.2	20255.7	22166.5	21125.3	23019.4	20942	0.953027	0.209841	0.909752	0.0490943	0.991321	0.812404	1.03848	0.0677675	10	4	84.564	Cytochrome b-c1 complex subunit 7 OS=Mus musculus GN=Uqcrb
Q9WV55	Vapa	3349.38	3809.67	3576.67	3246.84	3435.45	3329.74	5034.76	4965.55	4366.53	4319.41	4251.29	4583.68	3578.58	3337.34	4788.95	4384.79	0.93259	0.258598	0.915607	0.257586	1.31386	0.00849789	1.33823	0.0418591	2	1	11.3286	Vesicle-associated membrane protein-associated protein A OS=Mus musculus GN=Vapa
Q99KI0	Aco2	230182	226954	220346	231901	225902	228714	242956	242778	239640	234187	233998	228405	225827	228839	241791	232197	1.01334	0.493987	0.96032	0.0482135	1.01467	0.305364	1.07069	0.0156164	60	41	411.705	Aconitate hydratase, mitochondrial OS=Mus musculus GN=Aco2
Q8BL97	Srsf7	4058.68	4368.57	3918.26	3294.4	3069.93	3558.08	3114.11	3454.81	2937.18	4977.45	5072.88	4148.43	4115.17	3307.47	3168.7	4732.92	0.803726	0.0324663	1.49365	0.0461794	1.43098	0.0396762	0.770004	0.00346445	10	4	63.947	Serine/arginine-rich splicing factor 7 OS=Mus musculus GN=Srsf7
Q61781	Krt14	2796.91	2657.07	2855.94	2562.43	2471.41	2506.68	2125.51	2063.53	2209.02	2471	2352.1	2278.75	2769.98	2513.51	2132.69	2367.29	0.907411	0.060646	1.11	0.0672858	0.941826	0.133463	0.769929	0.000648764	37	2	209.33	Keratin, type I cytoskeletal 14 OS=Mus musculus GN=Krt14
P97807	Fh	28945.2	28476.2	29345.8	28006.1	29000.7	29143.2	29642.6	29764.6	29629.5	27720.2	28053.6	28776.3	28922.4	28716.7	29678.9	28183.4	0.992886	0.719538	0.949609	0.0759507	0.981429	0.369308	1.02616	0.123401	22	15	139.716	Fumarate hydratase, mitochondrial OS=Mus musculus GN=Fh
P62814	Atp6v1b2	5067.15	5580.77	5472.08	4947.02	4924.84	4733.21	5994.79	5659.5	6215.13	5020.62	5246.11	5726.55	5373.33	4868.36	5956.47	5331.09	0.906022	0.103793	0.895008	0.131495	1.09505	0.180727	1.10852	0.154684	11	3	70.7138	V-type proton ATPase subunit B, brain isoform OS=Mus musculus GN=Atp6v1b2
Q9CWJ9	Atic	7476.64	7308.73	7609.99	7702.46	7355.93	7452.67	7769.86	8284.59	8205.66	7097.06	7313.04	7408.67	7465.12	7503.69	8086.71	7272.92	1.00517	0.832001	0.899368	0.0479121	0.969246	0.207561	1.08327	0.086881	13	4	72.852	Bifunctional purine biosynthesis protein PURH OS=Mus musculus GN=Atic
Q3TMW1	Ccdc102a	1061.65	1014.9	1133.75	1380.88	1386.97	1490.18	1160.25	1183.96	1320.48	1264.83	1304.5	1217.6	1070.1	1419.35	1221.56	1262.31	1.32637	0.00986219	1.03336	0.592486	0.88936	0.0435937	1.14154	0.0255856	5	1	13.1799	Coiled-coil domain-containing protein 102A OS=Mus musculus GN=Ccdc102a
Q61735	Cd47	3583.14	3725.42	3533.33	3925.95	3779.78	3644.67	4279.58	4438.28	4044.62	3710.52	3526.39	3528.14	3613.96	3783.47	4254.16	3588.35	1.0469	0.222545	0.843492	0.0388115	0.948429	0.166	1.17715	0.00707751	5	2	30.1369	Leukocyte surface antigen CD47 OS=Mus musculus GN=Cd47
Q9D6J5	Ndufb8	7290.33	7388.55	7187.21	7742.97	7664.09	7961.19	8501.79	8270.02	8398.53	7899.23	7678.31	7685.6	7288.69	7789.42	8390.11	7754.38	1.0687	0.03081	0.924228	0.0166734	0.995502	0.800054	1.15111	0.00978502	6	2	41.2849	NADH dehydrogenase [ubiquinone] 1 beta subcomplex subunit 8, mitochondrial OS=Mus musculus GN=Ndufb8
P47757	Capzb	8980	9635.51	9954.82	9912.98	9141.62	9521.11	12608.6	12740.1	12951	10847.8	10885	10990.2	9523.45	9525.24	12766.5	10907.7	1.00019	0.997091	0.854394	0.0084453	1.14513	0.0365597	1.34054	0.00617167	9	4	60.5284	F-actin-capping protein subunit beta OS=Mus musculus GN=Capzb
Q8BFZ3	Actbl2	125.168	391.193	445.483	444.468	348.05	427.646	929.51	881.198	893.618	795.754	784.761	817.975	320.615	406.721	901.442	799.496	1.26857	0.539543	0.886908	0.0250899	1.96571	0.00912686	2.81161	0.107422	71	1	235.627	Beta-actin-like protein 2 OS=Mus musculus GN=Actbl2
Q64727	Vcl	73615.5	73327.3	75521.8	77297.3	78796.6	80618.9	76223.6	75921.3	78829.6	66199.8	65732.8	65497.9	74154.9	78904.3	76991.5	65810.2	1.06405	0.0403068	0.854772	0.0215282	0.834051	0.010851	1.03825	0.00512162	52	29	372.545	Vinculin OS=Mus musculus GN=Vcl
Q91V92	Acly	7424.42	7326.66	7788.32	7930.81	8156.57	8160.59	7786.46	7337	7396.81	6834.87	7007.09	6527.31	7513.13	8082.66	7506.76	6789.76	1.0758	0.065209	0.904486	0.0537116	0.84004	0.0102018	0.999151	0.978994	18	7	94.4746	ATP-citrate synthase OS=Mus musculus GN=Acly
Q9CQE1	Nipsnap3b	3639.68	3438.78	3596.61	3737.25	3374.75	3531.67	5018.04	5255.44	4852.65	3592.82	3663.26	3560.02	3558.36	3547.89	5042.04	3605.37	0.997059	0.955036	0.715061	0.0200062	1.0162	0.683596	1.41696	0.0119675	2	1	11.908	Protein NipSnap homolog 3B OS=Mus musculus GN=Nipsnap3b
P02469	Lamb1	10882	10767.7	9775.74	10803.8	10125.1	9635.3	8665.77	8605.72	8105.09	9674.52	9570.23	8982.96	10475.1	10188.1	8458.86	9409.24	0.972595	0.643753	1.11235	0.0623903	0.923555	0.171033	0.807518	0.00363369	32	6	157.814	Laminin subunit beta-1 OS=Mus musculus GN=Lamb1
Q9CZ44	Nsfl1c	15975.3	16231.5	15529.1	16441	16262.3	15777.3	12952.7	12664.2	12479.1	12989	12614.3	12227.5	15912	16160.2	12698.7	12610.3	1.0156	0.493987	0.993039	0.797989	0.78033	0.00240515	0.798059	0.00264194	12	7	77.0884	NSFL1 cofactor p47 OS=Mus musculus GN=Nsfl1c
Q8QZY9	Sf3b4	1064.3	957.203	932.372	1209.03	1204.67	1200.36	1222.34	1204.84	1179.42	1076.58	927.486	1018.4	984.624	1204.69	1202.2	1007.49	1.2235	0.058976	0.838035	0.0749795	0.836305	0.0656591	1.22098	0.0235047	3	1	18.9831	Splicing factor 3B subunit 4 OS=Mus musculus GN=Sf3b4
Q9CQU0	Txndc12	3888.86	3960.7	4197.52	4029.75	3940.59	4384.45	3466.66	3350.7	2998.4	2596.01	2741.68	2698.82	4015.69	4118.27	3271.92	2678.84	1.02554	0.628183	0.818735	0.0808619	0.650477	0.0128481	0.814783	0.0909625	6	2	36.476	Thioredoxin domain-containing protein 12 OS=Mus musculus GN=Txndc12
Q9ERR7	Sep15	1881.01	1974.77	1629.7	976.908	881.799	813.883	1654.95	1472.5	1039.53	2138.67	2418.33	1760.54	1828.49	890.863	1388.99	2105.84	0.487212	0.0163093	1.51609	0.0958071	2.36383	0.0328561	0.759639	0.0888224	1	1	5.54	15 kDa selenoprotein OS=Mus musculus GN=Sep15
P80313	Cct7	11330.7	10970.7	10876.4	12757.7	11875.1	12180.4	12337.2	12561.1	12554.7	10555.4	10221.4	10348.8	11059.3	12271.1	12484.3	10375.2	1.10957	0.0484606	0.831057	0.00374414	0.845501	0.0215049	1.12886	0.0219138	18	7	99.3271	T-complex protein 1 subunit eta OS=Mus musculus GN=Cct7
P54227	Stmn1	2592.77	2685.76	2551.07	3731.2	4176.77	3826.84	3249.08	3419.1	3610.34	2988.83	3315.51	3114.33	2609.87	3911.6	3426.17	3139.56	1.49877	0.020769	0.916347	0.170944	0.802627	0.0238689	1.31278	0.0192272	6	3	49.7269	Stathmin OS=Mus musculus GN=Stmn1
Q9Z1Z0	Uso1	3746.98	3367.07	3787.77	4621.24	4858.94	4241.08	3531.68	3711.99	3728.28	3666.84	3397.63	3540.08	3633.94	4573.75	3657.32	3534.85	1.25862	0.0356171	0.966515	0.366725	0.772856	0.0299605	1.00643	0.887107	24	5	132.856	General vesicular transport factor p115 OS=Mus musculus GN=Uso1
Q8K2B3	Sdha	74739.2	72784.5	75646.4	79026.7	80992.9	83611.2	83658.1	83686.7	86106.4	75108.2	74205.8	77303.8	74390	81210.3	84483.7	75539.2	1.09168	0.0375528	0.894128	0.0129975	0.930169	0.0471399	1.13569	0.00376296	33	18	196.455	Succinate dehydrogenase [ubiquinone] flavoprotein subunit, mitochondrial OS=Mus musculus GN=Sdha
Q9QUR6	Prep	2856.98	2486.75	2732.7	2333.64	2232.81	2449.09	2056.91	2531.99	2378.96	2859.82	2795.41	2809.8	2692.14	2338.51	2322.62	2821.68	0.868643	0.0983266	1.21487	0.114208	1.20661	0.0219834	0.86274	0.273735	10	2	44.413	Prolyl endopeptidase OS=Mus musculus GN=Prep
Q61001	Lama5	3941.11	4533.56	4309.98	3689.29	3450.36	3647.75	3603.31	3842.3	3452.88	3929.97	3870.32	3649.68	4261.55	3595.8	3632.83	3816.66	0.843778	0.0757779	1.0506	0.34392	1.06142	0.15646	0.852467	0.0534052	18	6	73.9027	Laminin subunit alpha-5 OS=Mus musculus GN=Lama5
O08788	Dctn1	2188.55	2196.29	2021.25	2190.03	2188.56	2231.14	1997.29	1797.06	1824.32	1881.19	1682.5	1997.92	2135.37	2203.24	1872.89	1853.87	1.03179	0.414038	0.989845	0.904795	0.841428	0.0833963	0.877081	0.0630707	11	2	38.2763	Dynactin subunit 1 OS=Mus musculus GN=Dctn1
Q8VDD5	Myh9	178743	177016	172688	176189	171254	170619	206358	205818	199280	215086	212552	207580	176149	172687	203819	211739	0.980347	0.299737	1.03886	0.112895	1.22614	0.00205889	1.15708	0.00027922	169	59	1109.07	Myosin-9 OS=Mus musculus GN=Myh9
Q8BMK4	Ckap4	1932.57	1809.96	1653.73	1550.1	1321.07	1207.06	1433.65	1148.24	1106.67	1385.88	1339.61	1339.05	1798.75	1359.41	1229.52	1354.84	0.755751	0.055348	1.10193	0.424762	0.996641	0.970483	0.683539	0.0139186	16	2	99.7865	Cytoskeleton-associated protein 4 OS=Mus musculus GN=Ckap4
P31786	Dbi	65113.7	63234.5	57438.7	57804.8	58166.9	55829.2	69628.9	66888.6	64256.7	78543	78860.4	73512.6	61929	57266.9	66924.7	76972	0.92472	0.223676	1.15013	0.0373912	1.34409	0.00933158	1.08067	0.044561	12	6	61.1657	Acyl-CoA-binding protein OS=Mus musculus GN=Dbi
Q3UZZ6	Sult1d1	66022.8	68700.3	70005	80090.8	79729.7	82490	96039.1	97313.4	97505.4	83930.8	84049.3	84529.3	68242.7	80770.1	96952.6	84169.8	1.18357	0.00780992	0.868154	0.00582898	1.04209	0.0762381	1.4207	0.00129056	25	18	145.264	Sulfotransferase 1 family member D1 OS=Mus musculus GN=Sult1d1
Q7TNG5	Eml2	4986.35	4924.7	5551.79	5534.96	5627.91	6009.36	6138.45	6419.09	6674.45	5548.36	5519.54	5392.7	5154.28	5724.08	6410.67	5486.86	1.11055	0.129769	0.855896	0.0482503	0.958559	0.281175	1.24376	0.0117907	11	1	59.1686	Echinoderm microtubule-associated protein-like 2 OS=Mus musculus GN=Eml2
Q70FJ1	Akap9	1960.97	1810.49	1715.9	2405.13	2540.78	1833.22	1438.01	1710.8	1609.98	1614.37	1687.76	1505.38	1829.12	2259.71	1586.26	1602.5	1.23541	0.22846	1.01024	0.904926	0.709161	0.113468	0.867227	0.227284	17	2	80.6713	A-kinase anchor protein 9 OS=Mus musculus GN=Akap9
P62852	Rps25	3599.51	4112.54	4345.48	3484.06	3558.07	3441.94	2282.63	2296.36	2303.67	2692.58	2509.79	2939.9	4019.18	3494.69	2294.22	2714.09	0.869504	0.18538	1.18301	0.127624	0.776632	0.0327792	0.570819	0.00898778	5	3	44.6698	40S ribosomal protein S25 OS=Mus musculus GN=Rps25
Q921M3	Sf3b3	1272.12	1165.82	1272.15	1330.53	1153.74	1242.26	965.446	1044.58	937.323	1010.74	1060.62	1118.02	1236.7	1242.18	982.45	1063.13	1.00443	0.95384	1.08212	0.209511	0.855859	0.0735911	0.794412	0.0632812	6	1	31.4454	Splicing factor 3B subunit 3 OS=Mus musculus GN=Sf3b3
Q8VBT0	Tmx1	3391.45	3380.56	3347.75	4030.02	4201.84	3880.48	3575.04	3676.37	3918.21	3278.21	3317.37	3290.32	3373.25	4037.45	3723.21	3295.3	1.1969	0.037446	0.88507	0.0918416	0.816183	0.0264049	1.10374	0.0872795	7	1	46.6181	Thioredoxin-related transmembrane protein 1 OS=Mus musculus GN=Tmx1
P62858	Rps28	5926.71	6161.92	5516.92	7591.27	7474.67	6173.24	5172.52	5175.5	4492.21	5355.45	4648.89	5191.5	5868.52	7079.72	4946.74	5065.28	1.20639	0.144956	1.02396	0.773261	0.715463	0.0482045	0.842929	0.0133305	1	1	8.1692	40S ribosomal protein S28 OS=Mus musculus GN=Rps28
Q8BL66	Eea1	9565.99	10747.9	10920.8	11705.2	11674.6	11789.3	8188.03	8505.85	8302.73	6647.22	6926.1	7130.53	10411.5	11723	8332.2	6901.28	1.12597	0.131613	0.828266	0.0127536	0.588694	0.00300682	0.800285	0.0238822	31	6	171.458	Early endosome antigen 1 OS=Mus musculus GN=Eea1
O35326	Srsf5	126.668	155.943	84.9781	96.8197	25.0808	48.6259	300.394	232.121	287.717	381.508	336.809	311.113	122.53	56.8422	273.411	343.143	0.463905	0.131434	1.25505	0.126132	6.03677	0.00358921	2.23138	0.073746	10	1	62.4434	Serine/arginine-rich splicing factor 5 OS=Mus musculus GN=Srsf5
Q8BWY3	Etf1	318.801	365.326	388.86	286.252	199.382	237.406	417.355	377.499	518.492	404.715	331.776	428.436	357.662	241.013	437.782	388.309	0.673856	0.0478646	0.886991	0.468955	1.61115	0.0334134	1.22401	0.138902	2	1	9.6252	Eukaryotic peptide chain release factor subunit 1 OS=Mus musculus GN=Etf1
Q8CDV0	Ccdc178	47598.8	47530.4	48534.1	57237.2	56758.9	59335.5	54685.9	51674.3	56276.1	40366.7	42186.4	46623.3	47887.8	57777.2	54212.1	43058.8	1.20651	0.0105836	0.794266	0.0336028	0.745256	0.0170606	1.13207	0.025525	3	2	13.5831	Coiled-coil domain-containing protein 178 OS=Mus musculus GN=Ccdc178
P16014	Chgb	21816.9	20792.5	22210.3	30268	31787.6	31768.3	41087.1	40540.9	41465.4	39082.8	39161.2	38920.9	21606.6	31274.6	41031.1	39055	1.44746	0.00258301	0.951838	0.038562	1.24878	0.0102685	1.89901	0.000426835	26	7	140.166	Secretogranin-1 OS=Mus musculus GN=Chgb
Q8VCN5	Cth	4465.24	4413.26	4359.28	4440.82	4379.92	4285.35	4905.08	4803.54	4985.25	4649.72	4484.68	4797.94	4412.59	4368.7	4897.96	4644.11	0.990052	0.531113	0.948174	0.140268	1.06304	0.0993855	1.10999	0.0205349	6	3	34.778	Cystathionine gamma-lyase OS=Mus musculus GN=Cth
Q9WTP7	Ak3	17071.3	16516.2	16845.4	19673.5	19419.6	18910.6	19086.9	18514.2	18730.8	16591.1	16107.8	17274.4	16811	19334.6	18777.3	16657.8	1.15012	0.00711648	0.887122	0.0361116	0.861554	0.0117272	1.11697	0.000466211	9	4	66.0245	GTP:AMP phosphotransferase AK3, mitochondrial OS=Mus musculus GN=Ak3
P97384	Anxa11	16602	17415.9	17001.8	13476.6	13928.4	12978.2	16309.9	17440.6	15675.6	17178.6	20032.5	15973.7	17006.6	13461.1	16475.4	17728.3	0.791522	0.00539917	1.07605	0.493275	1.317	0.0886597	0.968764	0.322606	18	6	133.428	Annexin A11 OS=Mus musculus GN=Anxa11
P59999	Arpc4	18887.3	18799.1	17564.7	19622	19859.8	18944.5	20615.8	19833.3	19358.1	18473.6	18506.4	18263.7	18417	19475.4	19935.8	18414.6	1.05747	0.163316	0.923696	0.0888103	0.945529	0.0742778	1.08246	0.0266751	8	6	60.0763	Actin-related protein 2/3 complex subunit 4 OS=Mus musculus GN=Arpc4
P62911	Rpl32	5632.93	5704.06	5840.47	6751.07	6433.02	6229.38	4781.5	4573.31	4802.6	5386.44	4926.24	5448.1	5725.82	6471.16	4719.14	5253.59	1.13017	0.0506423	1.11325	0.111968	0.811848	0.0140329	0.824185	0.00720118	6	4	58.3356	60S ribosomal protein L32 OS=Mus musculus GN=Rpl32
P02301	H3f3c	407569	406570	418781	300090	307341	321866	318009	323498	330904	331225	325749	337379	410973	309766	324137	331451	0.753737	0.00477749	1.02256	0.291824	1.07	0.0802779	0.788706	0.000581361	41	32	126.692	Histone H3.2 OS=Mus pahari GN=H312
P62075	Timm13	732.068	615.007	741.311	369.565	445.228	443.165	257.761	61.0333	107.876	152.193	168.001	284.759	696.129	419.319	142.223	201.651	0.602359	0.0223398	1.41785	0.54116	0.480901	0.0309155	0.204306	0.0424941	2	1	5.0473	Mitochondrial import inner membrane translocase subunit Tim13 OS=Mus musculus GN=Timm13
P63321	Rala	2265.8	2466.85	2614.31	2501.31	2768.67	2629.36	2881.58	2846.07	2663.91	2758.24	2658.84	2694.99	2448.99	2633.11	2797.19	2704.02	1.07518	0.283228	0.966694	0.380158	1.02693	0.506464	1.14218	0.171724	5	1	16.5076	Ras-related protein Ral-A OS=Mus musculus GN=Rala
Q00623	Apoa1	70475.5	69353.4	70966.9	69209.5	68909.2	67292.8	69070	69901.5	69782.7	82043.5	79698.1	81541.6	70265.3	68470.5	69584.7	81094.4	0.974457	0.12259	1.1654	0.0113696	1.18437	0.00204479	0.990315	0.386905	28	16	195.618	Apolipoprotein A-I OS=Mus musculus GN=Apoa1
Q8CHP8	Pgp	656.664	641.121	335.762	492.491	360.556	310.372	191.909	209.719	76.0759	751.899	593.29	423.26	544.516	387.806	159.235	589.483	0.712204	0.33369	3.70198	0.0643894	1.52004	0.192348	0.292433	0.00715024	4	1	17.1214	Phosphoglycolate phosphatase OS=Mus musculus GN=Pgp
Q9ERG0	Lima1	13936.4	14302.8	14310.5	15815	15450.5	14963.1	15059.1	14918.1	15813.5	12660.2	12692.1	12658.3	14183.2	15409.5	15263.5	12670.2	1.08646	0.0442959	0.830097	0.034797	0.822233	0.017833	1.07617	0.0489622	14	4	85.5031	LIM domain and actin-binding protein 1 OS=Mus musculus GN=Lima1
Q8VHP7	Serpinb1b	361.258	513.363	490.505	333.492	225.756	389.632	657.284	749.827	563.297	577.886	560.308	446.68	455.042	316.293	656.803	528.291	0.695086	0.153677	0.804338	0.19936	1.67026	0.0468834	1.44339	0.107463	12	1	84.4389	Leukocyte elastase inhibitor B OS=Mus musculus GN=Serpinb1b
Q9D358	Acp1	1214.34	971.583	1090.26	910.194	1076.08	1030.76	957.12	829.87	567.961	839.214	682.125	687.019	1092.06	1005.68	784.984	736.119	0.920901	0.43489	0.937751	0.774696	0.731963	0.0338333	0.71881	0.150207	2	1	13.0631	Low molecular weight phosphotyrosine protein phosphatase OS=Mus musculus GN=Acp1
Q9CQN1	Trap1	6522.38	6829.74	6532.45	6977.69	6472.67	6040.41	5529.24	5593.78	4782.8	5766.2	5621.55	5765.93	6628.19	6496.93	5301.94	5717.89	0.980196	0.739197	1.07845	0.322429	0.880092	0.127282	0.799908	0.0364028	26	6	147.556	Heat shock protein 75 kDa, mitochondrial OS=Mus musculus GN=Trap1
Q8R3G9	Tspan8	1766.63	1658.79	1341.83	1391.64	1077.18	856.491	1712.93	1170.12	1082.74	1862.42	1820.02	1571.37	1589.08	1108.44	1321.93	1751.27	0.697532	0.117721	1.32478	0.213441	1.57994	0.0512336	0.83188	0.164652	4	2	26.171	Tetraspanin-8 OS=Mus musculus GN=Tspan8
Q61543	Glg1	4064	3614.55	3417.44	3523.96	3318.85	3143	3290.7	2770.93	3198.85	3416.67	3764.62	3657.66	3698.67	3328.61	3086.83	3612.98	0.899948	0.240779	1.17045	0.105785	1.08543	0.165847	0.834578	0.0934167	15	4	74.4001	Golgi apparatus protein 1 OS=Mus musculus GN=Glg1
O08749	Dld	5873	5720.95	6057.71	5523.32	6159.21	6081.46	5852.96	6175.4	5859.25	5539.63	6100.4	6207.76	5883.89	5921.33	5962.54	5949.27	1.00636	0.903594	0.997774	0.966445	1.00472	0.935451	1.01337	0.725265	15	5	111.537	Dihydrolipoyl dehydrogenase, mitochondrial OS=Mus musculus GN=Dld
P70404	Idh3g	429.179	384.776	378.069	322.188	330.329	286.449	647.372	709.362	724.339	527.748	569.598	462.079	397.341	312.989	693.691	519.808	0.787707	0.0363067	0.749337	0.038562	1.66079	0.023303	1.74583	0.0172191	4	1	20.6573	Isocitrate dehydrogenase [NAD] subunit gamma 1, mitochondrial OS=Mus musculus GN=Idh3g
Q9D8Y0	Efhd2	6396.08	6286.16	6427.79	5329.56	5263.95	5448.36	7880.89	7661.4	7854.86	6793.31	6673.3	6628.74	6370.01	5347.29	7799.05	6698.45	0.839448	0.00261529	0.85888	0.00585745	1.25268	0.00103855	1.22434	0.000263364	13	5	105.804	EF-hand domain-containing protein D2 OS=Mus musculus GN=Efhd2
Q9CXI5	Manf	7594.92	8686.72	7891.47	5932.24	5895.5	6042.29	7327.22	7388.16	7501.09	11049.4	12525.6	11343.9	8057.7	5956.68	7405.49	11639.6	0.739253	0.0435582	1.57175	0.0336028	1.95404	0.0143831	0.919057	0.172637	2	2	17.7449	Mesencephalic astrocyte-derived neurotrophic factor OS=Mus musculus GN=Manf
Q71LX4	Tln2	2388.31	2537.02	2312.3	1853.6	1712.33	1479.84	1769.05	1861.27	1578.05	1369.35	1211.17	1353.86	2412.54	1681.92	1736.12	1311.46	0.697157	0.0228404	0.755396	0.0472425	0.77974	0.0819954	0.719623	0.006058	13	2	63.0462	Talin-2 OS=Mus musculus GN=Tln2
Q9D554	Sf3a3	676.864	550.069	832.99	383.962	283.415	427.427	811.883	872.233	720.24	968.481	1086.57	1080.16	686.641	364.935	801.452	1045.07	0.531478	0.0690907	1.30397	0.0408627	2.86372	0.00247188	1.16721	0.443926	4	1	22.2181	Splicing factor 3A subunit 3 OS=Mus musculus GN=Sf3a3
Q99LC3	Ndufa10	23022.8	23099.1	23110.5	23321.2	23038	23398.3	25542.5	25393.3	26343.2	22569.8	22650.2	23430.8	23077.5	23252.5	25759.7	22883.6	1.00758	0.305917	0.888348	0.0131719	0.984134	0.356082	1.11623	0.00966482	12	8	76.2907	NADH dehydrogenase [ubiquinone] 1 alpha subcomplex subunit 10, mitochondrial OS=Mus musculus GN=Ndufa10
Q8VE97	Srsf4	1034.78	1165.04	999.656	884.255	1046.57	1127.52	677.207	1031.17	447.892	446.996	601.2	759.88	1066.49	1019.45	718.757	602.692	0.95589	0.678268	0.83852	0.65646	0.591194	0.0401741	0.673946	0.149894	4	2	22.1205	Serine/arginine-rich splicing factor 4 OS=Mus musculus GN=Srsf4
P09055	Itgb1	29969.8	30767	32020.9	30717.7	30662.8	31330.5	31046.4	30805.3	30044.9	41194.5	39037.1	39159.5	30919.3	30903.6	30632.2	39797.1	0.999495	0.986022	1.29919	0.0127671	1.28778	0.0100632	0.990716	0.784693	16	9	93.1355	Integrin beta-1 OS=Mus musculus GN=Itgb1
O09159	Man2b1	8762.81	9464.13	9862.61	10042.5	9965.67	9935.56	10904	10806.9	11179.6	8307.32	8349.12	8767.32	9363.18	9981.24	10963.5	8474.59	1.06601	0.247433	0.772981	0.00559771	0.849052	0.0166537	1.17092	0.0337325	5	3	25.0728	Lysosomal alpha-mannosidase OS=Mus musculus GN=Man2b1
O09111	Ndufb11	5572.47	5812.49	6165.33	6663.2	6538.68	7209.23	6809.58	7356.76	7025.93	5461.07	5410.72	6043.69	5850.09	6803.71	7064.09	5638.49	1.16301	0.0486898	0.798191	0.0245805	0.828738	0.0287607	1.20752	0.0256305	4	3	14.3556	NADH dehydrogenase [ubiquinone] 1 beta subcomplex subunit 11, mitochondrial OS=Mus musculus GN=Ndufb11
P09411	Pgk1	92712.7	95728.8	93256.7	94020.7	92467.6	90399.2	104785	106623	102347	97885.6	95795.8	96719.2	93899.4	92295.8	104585	96800.2	0.982922	0.375899	0.925565	0.0361116	1.0488	0.0477248	1.1138	0.00614365	45	22	290.642	Phosphoglycerate kinase 1 OS=Mus musculus GN=Pgk1
Q9Z204	Hnrnpc	21073.6	21174.8	20309.5	19961.3	19400.8	19722.1	19827.6	20177.8	20248.7	18314.4	18452.7	18984.6	20852.6	19694.7	20084.7	18583.9	0.944474	0.0580864	0.925276	0.0238569	0.943598	0.0269403	0.963176	0.167363	13	9	82.8175	Heterogeneous nuclear ribonucleoproteins C1/C2 OS=Mus musculus GN=Hnrnpc
Q9Z110	Aldh18a1	2492.6	2594.58	2627.36	2348.65	2428.56	2169.79	1894.35	1935.48	1798.21	2297.68	2213.74	2081.3	2571.51	2315.66	1876.01	2197.57	0.900507	0.0943992	1.17141	0.0460157	0.949004	0.346989	0.729537	0.0102896	3	2	19.4458	Delta-1-pyrroline-5-carboxylate synthase OS=Mus musculus GN=Aldh18a1
O35381	Anp32a	13593.2	13425.9	12230.7	12121.6	11321.2	11420.8	13436.1	13932.2	13794.1	14134.5	13751.7	13316.9	13083.2	11621.2	13720.8	13734.4	0.888251	0.0899787	1.00099	0.971467	1.18184	0.0103383	1.04873	0.334549	9	4	54.8765	Acidic leucine-rich nuclear phosphoprotein 32 family member A OS=Mus musculus GN=Anp32a
Q62425	Ndufa4	13191.3	13586.4	12691.2	12905.7	13116.3	12179.3	12175.1	12033.4	12004	14557.9	15297.5	14961.5	13156.3	12733.8	12070.8	14939	0.967885	0.393224	1.23761	0.0182259	1.17318	0.0116024	0.917496	0.0465444	4	3	43.716	NADH dehydrogenase [ubiquinone] 1 alpha subcomplex subunit 4 OS=Mus musculus GN=Ndufa4
P45377	Akr1b8	919.764	922.074	829.729	289.114	308.234	434.857	342.073	299.168	120.041	1008.06	981.774	901.482	890.522	344.068	253.761	963.771	0.386367	0.00690299	3.79795	0.0166734	2.8011	0.00370681	0.284957	0.044514	5	1	27.6546	Aldose reductase-related protein 2 OS=Mus musculus GN=Akr1b8
Q9CQQ7	Atp5f1	49582.5	46211.6	45102.4	46522.3	46084.4	45680.3	58922.1	59972.5	60166.4	54795.8	55642.4	55009.4	46965.5	46095.6	59687	55149.2	0.981479	0.642803	0.923973	0.0101493	1.19641	0.000518623	1.27087	0.0203797	17	12	112.251	ATP synthase F(0) complex subunit B1, mitochondrial OS=Mus musculus GN=Atp5f1
Q6P069	Sri	24905.6	24727.4	25850.8	21651.8	21792.4	23096.8	26397.6	26284.7	26995.5	27344	27026.7	27684.9	25161.3	22180.3	26559.3	27351.9	0.881528	0.0228114	1.02984	0.0967902	1.23316	0.00950844	1.05556	0.0101366	13	7	82.9538	Sorcin OS=Mus musculus GN=Sri
Q8QZY1	Eif3l	2700.38	2924.94	2817.66	2949.27	2960	2956.33	3050.17	3148.71	3167.43	3151.87	3215.21	3057.58	2814.33	2955.2	3122.1	3141.55	1.05006	0.211839	1.00623	0.800642	1.06306	0.0775018	1.10936	0.0208786	8	2	38.1615	Eukaryotic translation initiation factor 3 subunit L OS=Mus musculus GN=Eif3l
O08795	Prkcsh	24386.6	25892.6	25754.5	24667	24428.7	25427.1	26684.1	26524.4	28086.6	26351.3	24780.2	24891.9	25344.6	24840.9	27098.4	25341.1	0.980128	0.493987	0.935153	0.114714	1.02014	0.496479	1.0692	0.0890767	17	10	102.837	Glucosidase 2 subunit beta OS=Mus musculus GN=Prkcsh
P70349	Hint1	391.722	404.939	321.183	308.144	287.528	336.78	55.3024	105.675	39.7921	132.523	112.253	62.7974	372.615	310.817	66.9231	102.525	0.834153	0.173145	1.53198	0.357872	0.329854	0.00717266	0.179604	0.015951	4	1	20.5155	Histidine triad nucleotide-binding protein 1 OS=Mus musculus GN=Hint1
P42125	Eci1	28955.8	28878.8	28378.9	26295.4	25204.5	25418.1	25868.2	25891.3	25015	27475.2	27544.6	27718.2	28737.8	25639.3	25591.5	27579.4	0.89218	0.0135799	1.07768	0.0429679	1.07567	0.0396762	0.890517	0.00197681	14	8	88.323	Enoyl-CoA delta isomerase 1, mitochondrial OS=Mus musculus GN=Eci1
Q922B2	Dars	19052.3	18631.5	19219.8	21589.4	21606.4	21533.1	20146.6	20406.5	19935	18464.4	18169.4	18339.9	18967.9	21576.3	20162.7	18324.6	1.13752	0.014684	0.908837	0.00855751	0.849293	0.00264501	1.06299	0.0617945	19	7	120.555	Aspartate--tRNA ligase, cytoplasmic OS=Mus musculus GN=Dars
Q9JHW2	Nit2	864.302	726.26	503.79	533.422	381.614	269.465	439.172	222.969	391.224	653.912	764.751	609.298	698.117	394.834	351.122	675.987	0.56557	0.127512	1.92522	0.0479121	1.71208	0.066426	0.502955	0.119768	2	2	10.9421	Omega-amidase NIT2 OS=Mus musculus GN=Nit2
Q60930	Vdac2	49660.4	47997.8	45966.6	48931.3	48224.1	46364.1	49315.8	48101	46360.2	48996.1	47918.1	47069.8	47874.9	47839.8	47925.6	47994.7	0.999267	0.984702	1.00144	0.963455	1.00324	0.892679	1.00106	0.80909	18	10	152.094	Voltage-dependent anion-selective channel protein 2 OS=Mus musculus GN=Vdac2
P21460	Cst3	929.785	965.993	948.63	979.849	928.597	897.77	762.006	723.069	742.11	847.116	606.816	700.595	948.136	935.405	742.395	718.176	0.986573	0.71777	0.967377	0.805607	0.76777	0.103056	0.783005	0.0112451	1	1	5.8893	Cystatin-C OS=Mus musculus GN=Cst3
Q9CZD3	Gars	6546.99	6514.32	6485.52	5417.27	5493.57	5491.14	7310.17	7184.96	7148.66	7223.21	7083.75	7144.53	6515.61	5467.33	7214.6	7150.5	0.839112	0.000934275	0.991115	0.447706	1.30786	0.000657205	1.10728	0.00169617	18	5	104.897	Glycine--tRNA ligase OS=Mus musculus GN=Gars
P97311	Mcm6	4773.62	4612.98	4178.63	4329.5	4163.3	4081.81	3921.12	4117.42	3483.02	3576.67	3947.52	3826.31	4521.74	4191.54	3840.52	3783.5	0.926974	0.250084	0.985153	0.845562	0.902652	0.0638497	0.849345	0.0234759	4	2	15.843	DNA replication licensing factor MCM6 OS=Mus musculus GN=Mcm6
P53810	Pitpna	868.322	692.558	610.888	693.853	764.824	706.07	866.099	815.004	1156.58	646.61	804.81	772.196	723.922	721.583	945.895	741.205	0.996768	0.984702	0.783602	0.254203	1.02719	0.766	1.30663	0.300126	3	1	19.9011	Phosphatidylinositol transfer protein alpha isoform OS=Mus musculus GN=Pitpna
P63085	Mapk1	2247.59	2402.68	2140.87	2196.99	2636.88	2494.01	3250.59	3541.63	3707.91	3232.03	3191.44	3024.74	2263.71	2442.63	3500.04	3149.4	1.07904	0.372708	0.899817	0.158717	1.28935	0.0309919	1.54615	0.0168155	14	3	70.6292	Mitogen-activated protein kinase 1 OS=Mus musculus GN=Mapk1
Q04447	Ckb	55137.4	56599.8	55531.2	45409.1	44240.6	43057.9	59651.1	60685.4	57882.3	50155.1	48645.6	48552.5	55756.1	44235.9	59406.3	49117.7	0.793381	0.00406968	0.826811	0.00946055	1.11036	0.0140329	1.06547	0.0299893	24	10	150.255	Creatine kinase B-type OS=Mus musculus GN=Ckb
Q64378	Fkbp5	311.12	298.848	380.973	638.471	721.426	668.623	1082.68	880.022	1041.43	811.267	762.086	613.334	330.314	676.173	1001.37	728.895	2.04706	0.005135	0.727895	0.069516	1.07797	0.522362	3.03159	0.00410259	6	1	46.4454	Peptidyl-prolyl cis-trans isomerase FKBP5 OS=Mus musculus GN=Fkbp5
P14869	Rplp0	43013.6	41590.9	40490.2	41798.3	45663.1	43926.7	39616.3	40405.8	40012.6	41434	41417.5	42412.4	41698.3	43796	40011.6	41754.6	1.05031	0.257998	1.04356	0.0426499	0.953389	0.242105	0.95955	0.192785	17	14	103.873	60S acidic ribosomal protein P0 OS=Mus musculus GN=Rplp0
Q60737	Csnk2a1	3298.62	3839.75	3284.82	2396.46	2543.24	2245.35	1714.04	1792.75	1401.38	2878.31	2437.1	2780.41	3474.4	2395.01	1636.05	2698.61	0.689332	0.0331266	1.64946	0.0199158	1.12676	0.175211	0.470889	0.00563512	7	2	43.5939	Casein kinase II subunit alpha OS=Mus musculus GN=Csnk2a1
Q8VCT3	Rnpep	11505.5	11446	10927.7	12048.3	12711	13108	11072.3	11398.9	11068.7	10473	10190.4	10563.2	11293.1	12622.4	11180	10408.9	1.11771	0.0561069	0.93103	0.0278351	0.824635	0.0227849	0.989983	0.578553	10	4	66.0193	Aminopeptidase B OS=Mus musculus GN=Rnpep
P60843	Eif4a1	21307.8	20942.8	18843.6	22344.6	22972.9	23097.8	23040.8	22708.2	22415.1	20643	20658.6	20066.9	20364.7	22805.1	22721.4	20456.2	1.11983	0.115486	0.900307	0.00954242	0.897001	0.00669909	1.11572	0.0714295	33	8	240.615	Eukaryotic initiation factor 4A-I OS=Mus musculus GN=Eif4a1
Q9D6R2	Idh3a	34041.5	34355	35078	30217.3	30511.3	31493.8	33416	34838	35324.5	35181.7	34410.6	35339.3	34491.5	30740.8	34526.2	34977.2	0.891258	0.00947619	1.01306	0.60615	1.13781	0.00558962	1.00101	0.942375	20	11	117.102	Isocitrate dehydrogenase [NAD] subunit alpha, mitochondrial OS=Mus musculus GN=Idh3a
Q8BT60	Cpne3	5121.01	5039.93	5293.47	5186.65	5730.34	5689.97	6678.46	6531.68	6439.13	5875.1	5619.81	5723.48	5151.47	5535.65	6549.76	5739.46	1.07458	0.195821	0.876286	0.0107426	1.03682	0.412951	1.27143	0.00845751	7	2	42.2647	Copine-3 OS=Mus musculus GN=Cpne3
P58252	Eef2	124099	124859	123815	128205	129089	127793	145986	143966	139946	135893	139720	133177	124258	128362	143299	136263	1.03303	0.00754668	0.9509	0.0966462	1.06155	0.069958	1.15324	0.0064961	56	29	365.219	Elongation factor 2 OS=Mus musculus GN=Eef2
Q9DCX2	Atp5h	32355	33743.9	35267.1	42203.4	40921	43225.6	43614.9	44562.9	44937	38990.3	38238	37419.1	33788.7	42116.6	44371.6	38215.8	1.24647	0.00921944	0.861268	0.00717451	0.90738	0.0229587	1.31321	0.00361333	16	7	108.382	ATP synthase subunit d, mitochondrial OS=Mus musculus GN=Atp5h
Q9Z1D1	Eif3g	11217.3	11238.8	10945.3	14115.2	12905.1	12599.1	11267.6	11175.4	10624.9	10434.2	9870.88	10071.9	11133.8	13206.5	11022.6	10125.7	1.18616	0.0720548	0.918625	0.0608854	0.766719	0.025954	0.990016	0.416704	8	2	51.7553	Eukaryotic translation initiation factor 3 subunit G OS=Mus musculus GN=Eif3g
P82347	Sgcd	1644.19	1631.65	1643.1	2141.73	1885.95	1929.91	1876.67	1729.93	1642.12	1295.75	1241.9	1361.13	1639.65	1985.87	1749.57	1299.59	1.21116	0.0798276	0.742806	0.0333837	0.654421	0.014105	1.06704	0.240854	2	1	15.2143	Delta-sarcoglycan OS=Mus musculus GN=Sgcd
P51881	Slc25a5	9647.3	9507.39	8465.84	7436.27	6700.76	6415.97	9739.81	9270.58	8984.18	10366.5	10217	10020.6	9206.84	6851	9331.52	10201.3	0.744121	0.0235103	1.09321	0.0798361	1.48903	0.0117272	1.01354	0.612972	31	4	149.768	ADP/ATP translocase 2 OS=Mus musculus GN=Slc25a5
P61290	Psme3	419.461	355.82	363.213	288.194	121.593	185.392	163.601	227.116	0	391.884	482.836	363.683	379.498	198.393	130.239	412.801	0.522777	0.0812036	3.16957	0.0694708	2.08072	0.0440619	0.343187	0.309396	2	1	11.5765	Proteasome activator complex subunit 3 OS=Mus musculus GN=Psme3
Q63918	Sdpr	3708.04	3620.42	3926.54	3497.69	3587.19	3766.72	4513.45	4793.26	4623.39	4226	4470.32	4342.42	3751.67	3617.2	4643.37	4346.25	0.964158	0.388043	0.936011	0.0942209	1.20155	0.008327	1.23768	0.0256832	7	2	48.1441	Serum deprivation-response protein OS=Mus musculus GN=Sdpr
O35286	Dhx15	668.079	686.43	664.601	378.213	410.846	379.373	490.67	391.23	371.516	667.729	746.806	617.784	673.037	389.477	417.805	677.44	0.578687	0.00198798	1.62143	0.0276443	1.73936	0.0231897	0.620776	0.0314408	3	1	13.7849	Putative pre-mRNA-splicing factor ATP-dependent RNA helicase DHX15 OS=Mus musculus GN=Dhx15
Q9QXT0	Cnpy2	5309.4	4958.76	4853.4	4569.28	4881.4	4383.35	5641.94	5077.87	5551.75	5546.32	5682.39	5455.65	5040.52	4611.34	5423.85	5561.45	0.914855	0.14239	1.02537	0.596326	1.20604	0.0230833	1.07605	0.154112	9	3	70.0285	Protein canopy homolog 2 OS=Mus musculus GN=Cnpy2
Q9D880	Timm50	1695.77	1614.73	1666.11	1827.63	1869.65	1905.43	1512.31	1566.16	1433.64	1458.99	1292.9	1524.54	1658.87	1867.57	1504.04	1425.48	1.12581	0.012429	0.947766	0.466068	0.763277	0.0290295	0.906664	0.109092	6	1	32.9933	Mitochondrial import inner membrane translocase subunit TIM50 OS=Mus musculus GN=Timm50
Q9CPW4	Arpc5	4123.69	4164.62	4115.25	3666.86	3446.65	3690.59	4629.07	4671.82	4609.17	3966.38	4192.88	3775.24	4134.52	3601.37	4636.68	3978.17	0.871049	0.0375528	0.857977	0.0636838	1.10463	0.0936987	1.12146	3.39971e-05	8	2	42.3791	Actin-related protein 2/3 complex subunit 5 OS=Mus musculus GN=Arpc5
Q8QZR5	Gpt	1867.77	1765.92	1987.06	1332.86	1487.24	1443.15	965.939	824.46	1006.74	1908.28	1916.31	1905.85	1873.59	1421.08	932.381	1910.15	0.758482	0.0192578	2.04867	0.0166734	1.34415	0.0183916	0.497645	0.00198433	6	2	30.2618	Alanine aminotransferase 1 OS=Mus musculus GN=Gpt
Q8BMD8	Slc25a24	31416.5	31448.5	32518.4	31088.4	31428.5	31279.7	36095.5	37197.8	37633.6	34671.8	35008.9	36558.9	31794.5	31265.5	36975.7	35413.2	0.983364	0.336714	0.957744	0.162524	1.13266	0.0301626	1.16296	0.00333163	18	14	122.976	Calcium-binding mitochondrial carrier protein SCaMC-1 OS=Mus musculus GN=Slc25a24
P14824	Anxa6	18693.2	18738.2	18084.9	15264.6	16814.7	16709.8	21001.8	21675	20176.2	18923.9	20937.3	20626.7	18505.4	16263	20951	20162.6	0.878824	0.0589033	0.96237	0.441602	1.23978	0.0197102	1.13216	0.00790226	40	16	248.476	Annexin A6 OS=Mus musculus GN=Anxa6
P07759	Serpina3k	12100.9	12132.7	10901.5	8689.94	9003.14	7130.86	9654.68	9513.55	7777.14	9551.13	8675.7	8814.14	11711.7	8274.65	8981.79	9013.66	0.70653	0.0274239	1.00355	0.971674	1.08931	0.380243	0.766909	0.0163038	15	3	93.735	Serine protease inhibitor A3K OS=Mus musculus GN=Serpina3k
P63330	Ppp2ca	2119.87	2138.92	2071.04	1039.09	981.572	1012.02	1237.06	1494.13	1195.19	1876.28	2051.78	2006.12	2109.94	1010.9	1308.79	1978.06	0.479111	0.000771794	1.51136	0.0263468	1.95674	0.00577707	0.620299	0.0160676	3	2	21.7528	Serine/threonine-protein phosphatase 2A catalytic subunit alpha isoform OS=Mus musculus GN=Ppp2ca
P51859	Hdgf	26129.1	26750.2	24378.8	21717.3	23830.2	23608.1	31538.2	29639.6	31077.5	32091.7	32665.7	33014.6	25752.7	23051.9	30751.8	32590.6	0.895125	0.0835837	1.0598	0.11239	1.4138	0.00690934	1.19412	0.0488165	10	8	68.9262	Hepatoma-derived growth factor OS=Mus musculus GN=Hdgf
O89110	Casp8	709.376	544.971	525.991	487.069	616.375	471.918	618.289	520.781	603.763	704.393	683.095	806.78	593.446	525.121	580.944	731.423	0.884867	0.472115	1.25902	0.0768095	1.39287	0.0440619	0.978934	0.870222	7	1	34.6686	Caspase-8 OS=Mus musculus GN=Casp8
Q8K0E8	Fgb	764.798	744.833	715.729	1182.41	1305.34	1302.57	2750.3	2925.91	3146.59	2338.04	2257.41	2477.1	741.787	1263.44	2940.94	2357.52	1.70324	0.0115062	0.801622	0.0480022	1.86595	0.00282351	3.96466	0.00177987	4	2	19.2625	Fibrinogen beta chain OS=Mus musculus GN=Fgb
O09053	Wrn	236.055	262.273	240.377	390.479	296.347	342.145	158.115	184.004	112.573	174.287	125.551	204.523	246.235	342.99	151.564	168.12	1.39294	0.096226	1.10924	0.683276	0.490161	0.0185531	0.615526	0.0584899	6	1	21.8224	Werner syndrome ATP-dependent helicase homolog OS=Mus musculus GN=Wrn
P61957	Sumo2	19601.1	18707.6	19325.5	21954.6	21538	21149.9	23685	23194.3	24278.5	19472.4	19598	19679.7	19211.4	21547.5	23719.3	19583.4	1.1216	0.0115062	0.825631	0.0201578	0.908845	0.0207895	1.23465	0.00292454	3	2	31.4002	Small ubiquitin-related modifier 2 OS=Mus musculus GN=Sumo2
Q8BMF4	Dlat	3972.45	3897.45	3879.13	3895.4	3833.62	3892.31	3817.73	3577.11	3734.12	3508.18	3454.31	3387.54	3916.34	3873.78	3709.65	3450.01	0.989131	0.355226	0.930009	0.0874336	0.890607	0.00577707	0.947224	0.0731949	4	3	10.1138	Dihydrolipoyllysine-residue acetyltransferase component of pyruvate dehydrogenase complex, mitochondrial OS=Mus musculus GN=Dlat
Q9QY76	Vapb	3582.53	3721.68	3947.95	5027.21	4647.92	4942.31	6677.81	6439.13	6764.81	5226.41	5104.48	5117.5	3750.72	4872.48	6627.25	5149.46	1.29908	0.00972333	0.777013	0.0113696	1.05685	0.15919	1.76693	0.00217124	8	1	62.7802	Vesicle-associated membrane protein-associated protein B OS=Mus musculus GN=Vapb
Q60972	Rbbp4	1454.01	1287.03	1451.47	1639.38	1586.93	1778.28	1762.29	1817.76	1854.26	1291.46	1215.41	1543.79	1397.51	1668.2	1811.44	1350.22	1.1937	0.0519973	0.745388	0.0721371	0.809389	0.0886597	1.29619	0.0283469	5	1	33.5572	Histone-binding protein RBBP4 OS=Mus musculus GN=Rbbp4
Q5SUR0	Pfas	2172.89	2233.23	2111.46	2094.82	2201.54	2464.19	2240.47	2111.17	2212.25	1867.84	2041.77	2147.19	2172.53	2253.52	2187.97	2018.93	1.03728	0.602817	0.922745	0.227768	0.895904	0.2028	1.00711	0.846522	7	2	35.4597	Phosphoribosylformylglycinamidine synthase OS=Mus musculus GN=Pfas
Q60994	Adipoq	727.914	774.659	865.541	577.825	498.701	504.952	530.816	590.275	422.005	271.247	493.769	522.513	789.371	527.16	514.365	429.176	0.667822	0.0234382	0.83438	0.500489	0.814129	0.387414	0.651614	0.0920535	3	1	16.1318	Adiponectin OS=Mus musculus GN=Adipoq
Q9CQ60	Pgls	606.589	564.873	563.768	512.742	452.446	493.35	206.882	220.173	148.398	283.599	332.854	313.358	578.41	486.18	191.817	309.937	0.840545	0.0365582	1.61579	0.0421947	0.637495	0.0069498	0.331629	0.0104659	2	1	4.3286	6-phosphogluconolactonase OS=Mus musculus GN=Pgls
Q8R5C5	Actr1b	881.918	1079.6	826.025	70.7291	59.1952	22.9646	49.744	42.2985	0	862.518	737.41	704.632	929.182	50.9629	30.6808	768.186	0.0548471	0.0193845	25.038	0.0131719	15.0734	0.00828158	0.0330192	0.0902446	4	1	23.4215	Beta-centractin OS=Mus musculus GN=Actr1b
Q9EQI8	Mrpl46	1550.02	1624.64	1573.23	1781.43	1786.53	1738.35	1389.53	1275.56	1416.32	1333.5	1166.07	1156.7	1582.63	1768.77	1360.47	1218.76	1.11761	0.0134966	0.895835	0.186023	0.689044	0.0169965	0.859627	0.0772634	3	2	16.1438	39S ribosomal protein L46, mitochondrial OS=Mus musculus GN=Mrpl46
P62830	Rpl23	3908.33	4431.34	4720.88	3834.15	3602.87	3358.92	2246.51	2419.83	2633.19	2646.39	2412	2525.11	4353.52	3598.65	2433.17	2527.83	0.826607	0.102588	1.0389	0.590689	0.70244	0.0154906	0.558899	0.000655118	2	2	13.6754	60S ribosomal protein L23 OS=Mus musculus GN=Rpl23
P61164	Actr1a	606.742	849.466	678.615	0	45.894	0	0	0	0	819.538	716.224	648.187	711.607	15.298	0	727.983	0.0214978	0.0229456	Inf	0.0204994	47.5867	0.00856878	0	0.000186135	5	1	30.0542	Alpha-centractin OS=Mus musculus GN=Actr1a
Q920A5	Scpep1	19413.2	17208	7732.94	6393.96	15324.9	21875	23151.1	11824.5	19988.7	13524.9	16677.8	12462.1	14784.7	14531.3	18321.5	14221.6	0.982858	0.976239	0.776227	0.428578	0.97869	0.956811	1.23922	0.581788	6	3	37.5338	Retinoid-inducible serine carboxypeptidase OS=Mus musculus GN=Scpep1
A2AQ07	Tubb1	214.678	335.858	343.705	358.916	448.41	460.702	705.456	767.669	886.991	582.23	565.305	611.877	298.08	422.676	786.705	586.471	1.41799	0.12259	0.745477	0.0996801	1.38752	0.0383804	2.63924	0.0114594	10	1	68.0853	Tubulin beta-1 chain OS=Mus musculus GN=Tubb1
Q569Z6	Thrap3	22344.8	21485.2	22240.9	18829.4	20099.6	20092.6	23763.8	23923	24012.1	24749.6	25335.5	24667.1	22023.6	19673.9	23899.6	24917.4	0.893307	0.0317417	1.04259	0.0636838	1.26652	0.00673491	1.08518	0.0261584	9	4	51.1152	Thyroid hormone receptor-associated protein 3 OS=Mus musculus GN=Thrap3
P28656	Nap1l1	3104.18	3042.48	2925.09	3170.65	2738.05	2946.54	2592.91	2170.31	2299.52	2839.94	2534.95	2344.43	3023.92	2951.75	2354.25	2573.1	0.976133	0.690663	1.09296	0.393851	0.871723	0.152541	0.778542	0.0315084	6	2	38.6681	Nucleosome assembly protein 1-like 1 OS=Mus musculus GN=Nap1l1
O70251	Eef1b	23282.1	24055	21869.2	19101.3	18702.3	17962.6	20614	20115.9	18675.1	24985.3	25442.7	23679.1	23068.8	18588.7	19801.7	24702.4	0.805796	0.0229488	1.24749	0.0176599	1.32889	0.0057585	0.858375	0.0117109	11	6	86.471	Elongation factor 1-beta OS=Mus musculus GN=Eef1b
Q8VHF2	Cdhr5	3901.46	4121.71	4407.26	3313.94	2827.55	2879.07	3074.78	3284.82	3254.48	3922.79	3624.15	3955.86	4143.48	3006.85	3204.69	3834.27	0.725683	0.0189877	1.19645	0.0348867	1.27518	0.0277242	0.77343	0.00851221	4	1	16.5153	Cadherin-related family member 5 OS=Mus musculus GN=Cdhr5
Q6P1F6	Ppp2r2a	1484.39	1359	1532.69	1653.56	1598.05	1584.35	1452.27	1537.1	1541.42	1487.71	1124.03	1299.48	1458.7	1611.99	1510.26	1303.74	1.10509	0.122798	0.863254	0.250579	0.808779	0.122317	1.03535	0.506839	6	1	34.0062	Serine/threonine-protein phosphatase 2A 55 kDa regulatory subunit B alpha isoform OS=Mus musculus GN=Ppp2r2a
P99026	Psmb4	2937.42	3046.59	2776.66	2594.17	2483.11	2457.36	2685.99	2664.96	2656.72	2816.61	2861.24	2704.95	2920.23	2511.54	2669.22	2794.27	0.860052	0.0392959	1.04685	0.167517	1.11257	0.0222651	0.914046	0.0749507	3	1	17.8401	Proteasome subunit beta type-4 OS=Mus musculus GN=Psmb4
Q99L13	Hibadh	5654.52	5520.97	5271.56	5973.14	6226.98	6041.6	5504.44	5637.9	5106.39	5822.58	5887.06	5987.77	5482.35	6080.58	5416.24	5899.14	1.10912	0.034269	1.08916	0.134515	0.970161	0.15919	0.987942	0.532493	12	4	74.4939	3-hydroxyisobutyrate dehydrogenase, mitochondrial OS=Mus musculus GN=Hibadh
Q9JIF7	Copb1	11932.5	11753.6	11173.9	11219.4	11208.2	10028.1	10766.5	11043.2	10017.6	12890.1	12643.7	11752.2	11620	10818.6	10609.1	12428.7	0.931032	0.222545	1.17151	0.0456585	1.14882	0.0576128	0.913002	0.0248019	23	8	175.019	Coatomer subunit beta OS=Mus musculus GN=Copb1
P46467	Vps4b	533.094	486.865	476.698	448.175	563.45	533.79	478.691	317.261	445.734	409.942	250.903	289.88	498.886	515.138	413.895	316.908	1.03258	0.753581	0.765673	0.303321	0.61519	0.0506088	0.829639	0.220483	1	1	5.5601	Vacuolar protein sorting-associated protein 4B OS=Mus musculus GN=Vps4b
Q8VCC2	Ces1	25912.8	25843.7	24777.6	23895.3	23047.1	22677.5	23125.8	22356.2	21753.9	21656.1	20698.5	20369.2	25511.4	23206.6	22412	20907.9	0.909658	0.0276473	0.932891	0.0958071	0.900946	0.0237208	0.878509	0.00478842	15	8	112.392	Liver carboxylesterase 1 OS=Mus musculus GN=Ces1
Q9EPC1	Parva	7095.96	6697.09	6620.96	7454.37	7139.45	7024.3	7536.63	7370.65	7878.43	7499.42	6905.96	6926.21	6804.67	7206.04	7595.24	7110.53	1.05898	0.155285	0.936183	0.185304	0.986746	0.737281	1.11618	0.0818313	13	5	83.2319	Alpha-parvin OS=Mus musculus GN=Parva
P57722	Pcbp3	932.855	855.774	863.945	789.168	764.446	838.419	589.834	466.949	454.65	740.683	719.413	778.133	884.191	797.344	503.811	746.076	0.901778	0.0928617	1.48087	0.0479121	0.935702	0.175665	0.569798	0.00960365	7	1	47.7789	Poly(rC)-binding protein 3 OS=Mus musculus GN=Pcbp3
Q99LJ1	Fuca1	7585	8232.81	7095.69	1540.44	1292.5	1002.29	2012.44	1911.31	1203.53	18733.8	18423.6	15335.2	7637.83	1278.41	1709.09	17497.5	0.167378	0.00491945	10.2379	0.0168073	13.687	0.010747	0.223767	0.00752049	5	3	20.7248	Tissue alpha-L-fucosidase OS=Mus musculus GN=Fuca1
Q8VDW0	Ddx39a	3369.42	3399.71	3451.29	3857.5	3668.71	3330.37	4853.41	4939.45	4699.24	3949.37	4012.35	4507.09	3406.81	3618.86	4830.7	4156.27	1.06224	0.36036	0.860387	0.0870009	1.1485	0.111633	1.41795	0.00338273	13	2	90.7567	ATP-dependent RNA helicase DDX39A OS=Mus musculus GN=Ddx39a
Q91V76	Ester hydrolase C11orf54 homolog	22783.1	22324.8	23397.2	25207.5	26433.5	27332.9	25920.9	27012.1	28086.5	27459.9	28292.2	27360.1	22835	26324.6	27006.5	27704.1	1.15282	0.0343375	1.02583	0.466479	1.0524	0.174983	1.18268	0.0130746	13	9	63.7089	Ester hydrolase C11orf54 homolog OS=Mus musculus
Q3ULJ0	Gpd1l	3430.23	3270.35	3136.21	3105.22	2808.4	2665.1	3461.67	3187.93	3269.16	2937.88	3148.57	2918.07	3278.93	2859.58	3306.26	3001.51	0.872106	0.0991619	0.907827	0.091713	1.04963	0.450805	1.00833	0.707513	10	3	52.1332	Glycerol-3-phosphate dehydrogenase 1-like protein OS=Mus musculus GN=Gpd1l
Q9ESK9	Rb1cc1	734.811	747.833	756.499	1057.13	814.76	843.016	992.138	862.637	782.786	753.345	685.394	741.73	746.381	904.97	879.187	726.823	1.21248	0.223777	0.826699	0.177994	0.803146	0.171033	1.17793	0.175655	5	1	25.1566	RB1-inducible coiled-coil protein 1 OS=Mus musculus GN=Rb1cc1
P63037	Dnaja1	1419.12	1216.6	1458.22	1694.58	1740.96	1403.94	1246.36	1347.36	1203.4	1046.51	1014.03	894.657	1364.65	1613.16	1265.71	985.065	1.18211	0.182457	0.778273	0.0348867	0.610644	0.0280239	0.927497	0.499035	2	1	11.4933	DnaJ homolog subfamily A member 1 OS=Mus musculus GN=Dnaja1
Q9CZ30	Ola1	5151.86	5283.18	5204.14	4653.93	4947.28	4546.43	4514.1	4329.75	4210.74	5028.86	5017.13	4712.31	5213.06	4715.88	4351.53	4919.43	0.904628	0.0734891	1.13051	0.0409626	1.04316	0.313677	0.834736	0.0181186	5	3	27.8821	Obg-like ATPase 1 OS=Mus musculus GN=Ola1
Q9Z1Q9	Vars	9999.06	9571.93	9440.93	9340.29	9407.36	9424.45	10033.1	9858.84	9604.93	10598.6	10344.1	9980.31	9670.64	9390.7	9832.28	10307.7	0.971052	0.29522	1.04835	0.159387	1.09764	0.0520628	1.01671	0.157228	19	9	98.8866	Valine--tRNA ligase OS=Mus musculus GN=Vars
P21107	Tpm3	36647.5	35130	32596.6	43498.3	42884.4	40642.9	30529.3	29414	26974.5	28871.9	28888.3	27934.5	34791.3	42341.9	28972.6	28564.9	1.21702	0.0231491	0.985928	0.786049	0.674625	0.00639767	0.832753	0.000343631	52	7	294.4	Tropomyosin alpha-3 chain OS=Mus musculus GN=Tpm3
Q80YX1	Tnc	310.871	362.719	329.353	405.017	383.665	482.306	281.795	287.61	368.029	191.894	175.383	242.004	334.315	423.662	312.478	203.094	1.26726	0.117721	0.649945	0.0751447	0.479376	0.0138802	0.934683	0.540367	8	1	24.9938	Tenascin OS=Mus musculus GN=Tnc
A6X8Z5	Arhgap31	1033.37	978.933	894.219	1411.83	1306.16	1267.49	814.293	872.28	335.572	763.824	680.148	753.13	968.842	1328.49	674.048	732.367	1.37122	0.0141103	1.08652	0.806501	0.551277	0.00430292	0.695726	0.241525	4	1	16.9118	Rho GTPase-activating protein 31 OS=Mus musculus GN=Arhgap31
P14685	Psmd3	771.568	1110.09	756.596	1246	1346.38	1482.7	805.155	1230.96	737.023	1093.89	971.581	940.955	879.419	1358.36	924.381	1002.14	1.54461	0.060646	1.08412	0.727793	0.737757	0.0299168	1.05113	0.397863	5	2	24.9255	26S proteasome non-ATPase regulatory subunit 3 OS=Mus musculus GN=Psmd3
P52825	Cpt2	11652.2	11938.4	12323.3	12826.6	12607	13281.8	9359.43	9162.71	9424.76	11047.1	11434.7	11408.4	11971.3	12905.1	9315.63	11296.7	1.07801	0.0538927	1.21266	0.00661132	0.875367	0.0116024	0.778165	0.00394558	10	5	48.673	Carnitine O-palmitoyltransferase 2, mitochondrial OS=Mus musculus GN=Cpt2
Q6ZWN5	Rps9	2234.56	2128.96	2013.68	1977.39	1739.15	1735.57	673.885	777.493	884.896	1244.54	1063.05	1019.54	2125.74	1817.37	778.758	1109.04	0.854938	0.0724873	1.42412	0.0550322	0.610246	0.00886656	0.366348	0.0113957	2	1	12.8076	40S ribosomal protein S9 OS=Mus musculus GN=Rps9
Q99KJ8	Dctn2	5132.72	5804.28	4761.84	4042.15	3949.29	3447.41	3625.48	2912.34	2611.78	4144.9	4071.18	3791.59	5232.95	3812.95	3049.87	4002.55	0.728642	0.0469766	1.31237	0.122026	1.04973	0.479384	0.582819	0.0334459	6	3	34.0662	Dynactin subunit 2 OS=Mus musculus GN=Dctn2
Q9WV92	Epb41l3	17811.4	18049.5	18294.1	22912.5	22948.2	23324.8	18502	19612.4	19450	17164.8	17482	17417.9	18051.7	23061.8	19188.1	17354.9	1.27755	0.000934275	0.904459	0.0599298	0.752537	0.000452916	1.06296	0.0427792	13	8	71.9475	Band 4.1-like protein 3 OS=Mus musculus GN=Epb41l3
Q3TJ91	Llgl2	979.456	839.848	872.964	1266.92	1095.12	743.054	590.585	501.792	205.247	323.624	266.824	211.053	897.422	1035.03	432.541	267.167	1.15334	0.529122	0.617668	0.365426	0.258125	0.0512556	0.481982	0.118968	2	1	8.2079	Lethal(2) giant larvae protein homolog 2 OS=Mus musculus GN=Llgl2
Q9CPY7	Lap3	3884.61	4189.81	4287.71	5677.52	5760.88	5335.66	3877.35	3642.8	4002.62	3337.65	3049.49	3342.85	4120.71	5591.35	3840.92	3243.33	1.35689	0.0070606	0.844414	0.0397723	0.580062	0.00207608	0.932103	0.220248	13	4	61.6479	Cytosol aminopeptidase OS=Mus musculus GN=Lap3
P80317	Cct6a	13827.8	14386.7	14329.4	13444	14005.9	13313.2	14012.9	13875	13164.7	13054	14393.4	12840.1	14181.3	13587.7	13684.2	13429.1	0.958142	0.144416	0.981361	0.731474	0.98833	0.809575	0.964946	0.332425	22	10	133.176	T-complex protein 1 subunit zeta OS=Mus musculus GN=Cct6a
Q8VCC1	Hpgd	1348.53	1097.92	1349.89	1519.26	1695.18	1723.37	1257.43	1170.12	1404.96	1097.08	1185.24	1143.6	1265.45	1645.94	1277.5	1141.97	1.30068	0.0490608	0.893907	0.245696	0.693812	0.0181002	1.00953	0.810381	3	1	15.9283	15-hydroxyprostaglandin dehydrogenase [NAD(+)] OS=Mus musculus GN=Hpgd
Q91V12	Acot7	1508.46	1405.76	1341.11	1534.76	1469.21	1224.85	780.55	704.044	738.918	1272.02	1548.11	1124.99	1418.44	1409.61	741.171	1315.04	0.993771	0.956818	1.77428	0.0777799	0.932913	0.621464	0.522524	0.00185766	4	1	20.4246	Cytosolic acyl coenzyme A thioester hydrolase OS=Mus musculus GN=Acot7
P62754	Rps6	5483.93	5266.33	4970.49	1549.53	1457.53	1548.98	996.02	992.26	858.004	2203.25	3063.74	2113.2	5240.25	1518.68	948.761	2460.06	0.289811	0.006857	2.59292	0.0716658	1.61987	0.115807	0.181053	0.000220191	6	1	33.0659	40S ribosomal protein S6 OS=Mus musculus GN=Rps6
Q99JI4	Psmd6	4804.23	4653.6	4117.08	1344.3	1444.55	1250.91	2377.26	2339.78	2287.35	6650.3	6892.92	5706.62	4524.97	1346.59	2334.8	6416.61	0.297591	0.0110863	2.74825	0.0269349	4.76509	0.0115461	0.515981	0.00300366	9	4	46.0315	26S proteasome non-ATPase regulatory subunit 6 OS=Mus musculus GN=Psmd6
O70133	Dhx9	7926.75	7727.38	7729.06	9464.01	9196.03	9147.63	7935.5	7562.25	7305.56	7649.65	7454.54	7215.05	7794.4	9269.22	7601.1	7439.75	1.18922	0.00469363	0.978772	0.587364	0.802629	0.00299607	0.975201	0.264926	18	5	94.6848	ATP-dependent RNA helicase A OS=Mus musculus GN=Dhx9
Q9DC70	Ndufs7	502.488	403.635	300.929	214.57	84.5738	43.4775	117.927	141.384	63.6764	247.571	189.814	167.623	402.351	114.207	107.662	201.669	0.283849	0.0432072	1.87316	0.0870009	1.76582	0.268183	0.267583	0.0127019	4	1	25.056	NADH dehydrogenase [ubiquinone] iron-sulfur protein 7, mitochondrial OS=Mus musculus GN=Ndufs7
Q9D172	D10Jhu81e	4403.53	4386.4	4484.23	5003.13	4161.38	4442.03	5112.12	5281.4	5116.6	4425.16	4268.22	4282.07	4424.72	4535.51	5170.04	4325.15	1.02504	0.750594	0.836579	0.00585745	0.953619	0.529063	1.16844	0.0102103	6	2	47.6803	ES1 protein homolog, mitochondrial OS=Mus musculus GN=D10Jhu81e
P97823	Lypla1	392.727	365.145	364.207	535.682	419.458	451.916	265.544	303.719	321.873	304.211	267.997	270.671	374.026	469.019	297.046	280.96	1.25397	0.145564	0.945848	0.550169	0.599038	0.0383804	0.794183	0.102705	3	1	13.3242	Acyl-protein thioesterase 1 OS=Mus musculus GN=Lypla1
P18242	Ctsd	8745.1	8343.3	8880.69	8510.37	8752.23	8730.61	8864.06	9872.65	8838.6	9736.34	9686.65	9840.57	8656.36	8664.4	9191.77	9754.52	1.00093	0.976239	1.06122	0.312015	1.12582	0.00431689	1.06185	0.394787	6	4	52.3097	Cathepsin D OS=Mus musculus GN=Ctsd
Q9ET54	Palld	1906.88	1977.05	1796.71	1751.84	1690.42	1813.89	2203.76	1976.52	2287.58	2073.8	1906.18	2189.87	1893.55	1752.05	2155.96	2056.62	0.925275	0.142231	0.953925	0.54416	1.17384	0.0711881	1.13858	0.208566	7	1	41.9582	Palladin OS=Mus musculus GN=Palld
O09167	Rpl21	2904.73	3000.91	2337.34	1638.97	1621.19	1468.13	667.108	439.312	278.933	1946.17	2252.14	1746.47	2747.66	1576.1	461.784	1981.59	0.573614	0.0469766	4.29117	0.0114312	1.25728	0.125409	0.168065	0.0108718	2	2	12.9217	60S ribosomal protein L21 OS=Mus musculus GN=Rpl21
P11031	Sub1	2262.17	2333.77	2407.11	3373.98	3079.15	3328.95	2593.13	2417.33	2400.78	2269.76	2340.44	2406.06	2334.35	3260.69	2470.41	2338.75	1.39683	0.0137571	0.946706	0.223523	0.717257	0.0109588	1.05829	0.307752	6	1	18.6802	Activated RNA polymerase II transcriptional coactivator p15 OS=Mus musculus GN=Sub1
P54869	Hmgcs2	354179	352690	365937	394246	402355	411696	425940	430697	433758	484926	481201	488439	357602	402766	430131	484855	1.1263	0.0111482	1.12723	0.0033545	1.20381	0.00525329	1.20282	0.00215975	57	39	295.317	Hydroxymethylglutaryl-CoA synthase, mitochondrial OS=Mus musculus GN=Hmgcs2
P45952	Acadm	36322.7	37691.7	37556.8	38552.7	38509.4	39843.7	43477.6	42541.5	42417.2	38628.1	38820.1	38668	37190.4	38968.6	42812.1	38705.4	1.04781	0.0757779	0.904076	0.0226406	0.993245	0.651982	1.15116	0.0185937	15	8	141.543	Medium-chain specific acyl-CoA dehydrogenase, mitochondrial OS=Mus musculus GN=Acadm
P60229	Eif3e	5244.84	5174.57	5393.72	5600.4	5740.47	5647.75	4376.47	4620.3	4210.89	4317.37	4021.68	4281.94	5271.04	5662.87	4402.55	4207	1.07434	0.0269872	0.955582	0.343276	0.742908	0.0052124	0.835233	0.0430949	6	4	36.9022	Eukaryotic translation initiation factor 3 subunit E OS=Mus musculus GN=Eif3e
P51410	Rpl9	854.38	945.844	1016.6	1137.77	1011.76	966.253	707.965	567.945	704.586	726.39	766.171	892.506	938.942	1038.59	660.165	795.023	1.10613	0.283228	1.20428	0.179434	0.765479	0.0441413	0.703095	0.0625173	2	2	15.1006	60S ribosomal protein L9 OS=Mus musculus GN=Rpl9
P35279	Rab6a	1296.34	986.048	816.456	818.665	466.774	328.06	955.955	601.584	412.607	1352.66	1403.71	974.735	1032.95	537.833	656.715	1243.7	0.520677	0.109731	1.89382	0.0907803	2.31243	0.0396762	0.635767	0.0455081	7	1	50.7082	Ras-related protein Rab-6A OS=Mus musculus GN=Rab6a
P13745	Gsta1	1992.57	2028.73	2135.73	2272.66	2380.89	2508.75	1967.17	2244.64	2081.53	2171.64	2117.4	2101.77	2052.34	2387.43	2097.78	2130.27	1.16327	0.0414763	1.01549	0.778213	0.892285	0.0755651	1.02214	0.656247	5	2	30.5806	Glutathione S-transferase A1 OS=Mus musculus GN=Gsta1
Q99LD8	Ddah2	986.244	1027.76	963.414	968.958	903.098	929.722	778.795	772.554	811.217	643.469	586.983	707.025	992.473	933.926	787.522	645.826	0.941009	0.137119	0.820073	0.0817643	0.691517	0.0122607	0.793495	0.0196064	3	1	22.4799	N(G),N(G)-dimethylarginine dimethylaminohydrolase 2 OS=Mus musculus GN=Ddah2
Q922D4	Ppp6r3	1933.55	1730	1640.65	1151.55	1164.43	1439.04	1454.86	1304.88	1198.88	1752.55	1643.89	1509.1	1768.07	1251.67	1319.54	1635.18	0.707933	0.0347812	1.23921	0.0737666	1.3064	0.0525493	0.746317	0.00120218	1	1	3.9502	Serine/threonine-protein phosphatase 6 regulatory subunit 3 OS=Mus musculus GN=Ppp6r3
P10649	Gstm1	39533.2	40124.1	38229.3	39283.5	39425	39610.2	43156.7	44360	43620.5	42278.1	42494	42879.3	39295.5	39439.5	43712.4	42550.5	1.00367	0.860429	0.973419	0.105803	1.07888	0.00313975	1.1124	0.0148633	31	17	193.065	Glutathione S-transferase Mu 1 OS=Mus musculus GN=Gstm1
Q9DBP5	Cmpk1	84706.8	85697.2	87143.3	97864	95398.8	96812.1	109126	114622	112130	98645.2	97189.6	95484.6	85849.1	96691.6	111959	97106.4	1.1263	0.00427505	0.867339	0.0166734	1.00429	0.76771	1.30414	0.00228543	16	11	88.4413	UMP-CMP kinase OS=Mus musculus GN=Cmpk1
Q91VR5	Ddx1	27915.1	28534.6	30360.9	26742.7	26506.5	28154.9	28803.3	29957.3	30156.2	29253.1	28295	28871	28936.9	27134.7	29638.9	28806.4	0.93772	0.170393	0.97191	0.254905	1.06161	0.0868151	1.02426	0.274491	13	6	87.4117	ATP-dependent RNA helicase DDX1 OS=Mus musculus GN=Ddx1
O88427	Cacna1h	1807.5	1859.58	1949.31	2343.07	2173.35	2253.94	2463.6	2521.58	2661.97	2226.12	2246.25	2227.59	1872.13	2256.79	2549.05	2233.32	1.20547	0.0152678	0.876138	0.0669254	0.989599	0.714329	1.36158	4.65944e-05	5	1	19.8876	Voltage-dependent T-type calcium channel subunit alpha-1H OS=Mus musculus GN=Cacna1h
P58771	Tpm1	32273.1	30207.1	26186.8	36268	35345.8	30698.7	26003.9	24626.4	20381.4	20589.9	22375.8	21132.8	29555.7	34104.1	23670.5	21366.2	1.1539	0.189363	0.902649	0.38303	0.626498	0.0235892	0.80088	0.00385271	52	4	288.632	Tropomyosin alpha-1 chain OS=Mus musculus GN=Tpm1
Q9DCT8	Crip2	6828.3	6449.13	6682.95	5959.79	6646.63	7002.31	8420.59	9215.23	9246.13	6440.13	6269.2	6381.72	6653.46	6536.24	8960.65	6363.68	0.982382	0.794404	0.710181	0.030107	0.9736	0.671583	1.34677	0.0219081	7	2	32.8523	Cysteine-rich protein 2 OS=Mus musculus GN=Crip2
P61294	Rab6b	503.127	435.809	346.904	516.699	382.192	329.645	365.484	358.023	113.674	283.623	369.468	335.114	428.613	409.512	279.061	329.402	0.955435	0.845314	1.1804	0.673468	0.804376	0.332522	0.651078	0.199574	10	1	70.1368	Ras-related protein Rab-6B OS=Mus musculus GN=Rab6b
Q08331	Calb2	8463.95	8157.84	7023.76	5459.19	5058.22	4587.48	7059.6	7711.02	5555.55	7199.51	7575.4	6490.75	7881.85	5034.96	6775.39	7088.55	0.638805	0.0243396	1.04622	0.745638	1.40787	0.0181241	0.859619	0.0965423	9	3	71.8602	Calretinin OS=Mus musculus GN=Calb2
Q9JHC0	Gpx2	1516.65	1658.65	1475.13	1390.5	1294.43	1463.6	1301.65	1146.66	1155.4	1380.62	1441.27	1189.91	1550.15	1382.85	1201.24	1337.27	0.892074	0.129177	1.11324	0.291126	0.967041	0.683511	0.774917	0.055268	4	2	35.9468	Glutathione peroxidase 2 OS=Mus musculus GN=Gpx2
P61021	Rab5b	1621.84	1670.11	1460.72	1978.82	2107.95	2135.45	1574.85	1471.66	1448.59	1460.01	1467.69	1328.31	1584.22	2074.07	1498.36	1418.67	1.30921	0.015522	0.946812	0.327142	0.684001	0.00345637	0.945804	0.271342	5	1	20.7603	Ras-related protein Rab-5B OS=Mus musculus GN=Rab5b
Q5JCT0	Gcnt3	2544.43	2464.59	2211.47	2809.78	2686.43	2880.18	2615.53	2896.99	2863.13	2168.32	2349.53	2490.01	2406.83	2792.13	2791.88	2335.96	1.16008	0.0714206	0.836696	0.0556776	0.836622	0.0351516	1.15998	0.155519	3	2	16.4693	Beta-1,3-galactosyl-O-glycosyl-glycoprotein beta-1,6-N-acetylglucosaminyltransferase 3 OS=Mus musculus GN=Gcnt3
Q91WD9	Scgn	416.307	402.541	423.017	649.798	641.246	623.856	614.389	519.65	526.796	458.394	441.94	434.499	413.955	638.3	553.612	444.944	1.54195	0.00124198	0.803712	0.109322	0.697077	0.00101546	1.33737	0.0307063	6	1	28.4903	Secretagogin OS=Mus musculus GN=Scgn
Q9Z0G9	Cldn3	6996.61	6812.61	7576.09	8808.89	8802.88	9195.34	11084.2	10921.4	11394.6	10215.6	10475.1	11194.8	7128.44	8935.7	11133.4	10628.5	1.25353	0.0178995	0.954652	0.293541	1.18944	0.0295218	1.56183	0.00191818	7	6	45.1282	Claudin-3 OS=Mus musculus GN=Cldn3
P10107	Anxa1	16533.7	16059.2	16561.2	15951.2	15218.4	15338.7	18906.4	18688.4	19626.4	17281.4	17171.8	16827.5	16384.7	15502.8	19073.7	17093.6	0.946174	0.0687154	0.896185	0.0309307	1.10261	0.0165387	1.16412	0.00457794	16	7	97.7327	Annexin A1 OS=Mus musculus GN=Anxa1
Q99MR8	Mccc1	402.327	399.847	310.413	187.417	76.3926	225.738	257.423	273.204	357.918	242.303	245.116	220.875	370.862	163.183	296.182	236.098	0.440008	0.0464241	0.797139	0.257703	1.44683	0.285155	0.79863	0.345144	3	1	18.725	Methylcrotonoyl-CoA carboxylase subunit alpha, mitochondrial OS=Mus musculus GN=Mccc1
Q78IK2	Usmg5	15365.1	16362.6	16463	18723.4	18513.6	18571.1	21647.1	21561.8	21601	17578.9	17503.8	17685.7	16063.6	18602.7	21603.3	17589.5	1.15807	0.0353502	0.814202	0.00166956	0.945535	0.00240063	1.34486	0.00596995	2	2	18.3342	Up-regulated during skeletal muscle growth protein 5 OS=Mus musculus GN=Usmg5
P14206	Rpsa	42920.3	43778	44113.5	51840.2	52191.5	53521.4	46619.2	46785.7	45919.6	48112.8	46759.2	49240.4	43603.9	52517.7	46441.5	48037.5	1.20443	0.00373216	1.03437	0.209064	0.914691	0.0196197	1.06508	0.036513	11	8	53.3459	40S ribosomal protein SA OS=Mus musculus GN=Rpsa
Q61133	Gstt2	519.151	538.769	427.335	170.061	185.405	154.929	119.668	96.6549	85.0252	321.055	388.485	334.795	495.085	170.132	100.449	348.112	0.343641	0.0225162	3.46555	0.0127536	2.04613	0.0144955	0.202893	0.00205929	4	1	26.2682	Glutathione S-transferase theta-2 OS=Mus musculus GN=Gstt2
Q9JKB3	Ybx3	676.857	607.122	577.114	769.49	907.048	892.143	925.963	757.279	840.127	630.085	650.56	595.626	620.364	856.227	841.123	625.424	1.3802	0.0331401	0.743558	0.0735951	0.730441	0.0384856	1.35585	0.021209	8	1	41.9617	Y-box-binding protein 3 OS=Mus musculus GN=Ybx3
P99027	Rplp2	35151	33905.4	35313.6	43087.2	43129	42351.9	37398.7	37641.6	38298.9	36687.7	36571.6	36335.9	34790	42856	37779.7	36531.7	1.23185	0.00427505	0.966966	0.0652836	0.85243	0.00286443	1.08594	0.021502	15	9	72.2623	60S acidic ribosomal protein P2 OS=Mus musculus GN=Rplp2
P52196	Tst	24488.3	23739.6	23325	19156.8	18681.8	18108.4	22470	22922.8	22248.9	27101.5	26904.2	26813.1	23851	18649	22547.2	26939.6	0.781898	0.00406968	1.19481	0.00661132	1.44456	0.00362903	0.945338	0.0676046	14	9	86.1587	Thiosulfate sulfurtransferase OS=Mus musculus GN=Tst
P61205	Arf3	15543.4	14534.3	13984.9	14923.7	13016.4	12250.4	11950.4	11276.6	10084.4	13198.2	12152.5	11412.4	14687.5	13396.8	11103.8	12254.4	0.912122	0.306835	1.10362	0.271848	0.914723	0.349474	0.755999	0.00664374	8	4	55.8066	ADP-ribosylation factor 3 OS=Mus musculus GN=Arf3
Q5SQM0	Eml6	738.358	575.199	645.739	541.94	537.966	588.998	384.753	388.863	223.909	292.969	303.603	479.699	653.099	556.301	332.508	358.757	0.851787	0.218277	1.07894	0.805607	0.644897	0.0990676	0.509124	0.0689968	13	1	53.4986	Echinoderm microtubule-associated protein-like 6 OS=Mus musculus GN=Eml6
Q8BK64	Ahsa1	1178.61	1157.23	1005.31	774.943	971.904	990.359	953.767	1015.74	1153.98	1065.44	866.801	1092	1113.72	912.402	1041.16	1008.08	0.81924	0.128578	0.968222	0.785024	1.10486	0.430182	0.934854	0.585406	3	1	18.3134	Activator of 90 kDa heat shock protein ATPase homolog 1 OS=Mus musculus GN=Ahsa1
Q64444	Ca4	806.26	624.687	685.593	1385.45	1434.77	1274.22	1153.15	1116.94	1242.25	1498.5	1527.13	1481.89	705.513	1364.81	1170.78	1502.51	1.9345	0.00589666	1.28334	0.025983	1.10089	0.120301	1.65947	0.0218017	4	2	28.1871	Carbonic anhydrase 4 OS=Mus musculus GN=Ca4
Q9Z1N5	Ddx39b	5266.54	5033.14	4297.94	4102.04	3828.77	3238.79	4159.19	3752.75	3248.56	6011.82	5834.76	4786.32	4865.87	3723.2	3720.17	5544.3	0.765166	0.0734891	1.49034	0.0520617	1.48912	0.0365448	0.764543	0.00410748	17	2	121.505	Spliceosome RNA helicase Ddx39b OS=Mus musculus GN=Ddx39b
P55292	Dsc2	6127.74	6295.41	5862.36	6249.79	5487.65	5717	4311.78	3529.25	4171.91	5341.5	5361.55	5097.44	6095.17	5818.15	4004.31	5266.83	0.954551	0.416614	1.31529	0.0561361	0.905242	0.154843	0.656965	0.0320612	16	7	85.703	Desmocollin-2 OS=Mus musculus GN=Dsc2
Q148W0	Atp8b1	6225.57	5987.28	6314.4	1019.65	983.226	628.359	802.957	910.488	792.59	5457.4	5665.23	5277.41	6175.75	877.079	835.345	5466.68	0.14202	0.000815691	6.54422	0.0045547	6.23282	0.000512282	0.135262	0.000895102	15	3	69.3448	Probable phospholipid-transporting ATPase IC OS=Mus musculus GN=Atp8b1
P62827	Ran	54017.8	51517.7	54598.7	57450.9	60707.9	62833.9	68074	69029.1	70927.6	53929.5	55292.1	54304.9	53378.1	60330.9	69343.6	54508.8	1.13026	0.0520317	0.786069	0.00802096	0.903498	0.0803803	1.2991	0.00453928	10	6	65.5889	GTP-binding nuclear protein Ran OS=Mus musculus GN=Ran
Q3UEB3	Puf60	330.533	314.076	355.103	319.41	339.878	337.153	263.903	375.544	308.179	163.879	257.462	227.635	333.237	332.147	315.875	216.325	0.996728	0.95795	0.684845	0.132252	0.651295	0.0674414	0.947899	0.661127	4	1	15.0064	Poly(U)-binding-splicing factor PUF60 OS=Mus musculus GN=Puf60
Q9WUA2	Farsb	942.817	1122.07	953.437	1098.29	818.03	830.351	1005.1	831.844	601.708	1251.99	1017.41	1090.04	1006.11	915.556	812.884	1119.81	0.909996	0.517343	1.37758	0.157823	1.22309	0.190157	0.807948	0.273434	6	1	27.6933	Phenylalanine--tRNA ligase beta subunit OS=Mus musculus GN=Farsb
Q8BFR5	Tufm	56864.9	55920.2	55295.6	56782.4	58011	57793.6	62885.8	62106.1	62510.9	54495	53347.9	55285.8	56026.9	57529	62500.9	54376.2	1.02681	0.103429	0.870007	0.0119232	0.945197	0.0251471	1.11555	0.00377011	21	13	174.596	Elongation factor Tu, mitochondrial OS=Mus musculus GN=Tufm
Q5XJY5	Arcn1	45966.8	46950.1	48740.6	44118.5	45895.7	49257.2	58525.7	60027.6	60724.3	64002.8	65606.1	65192.8	47219.2	46423.8	59759.2	64933.9	0.983156	0.726991	1.08659	0.0192406	1.39872	0.010183	1.26557	0.00115718	24	13	134.681	Coatomer subunit delta OS=Mus musculus GN=Arcn1
P62196	Psmc5	2710.52	2603.39	2430.3	2966.27	2949.9	2806.58	2427.91	2175.13	2222.7	2421.78	2255.83	1801.36	2581.4	2907.58	2275.25	2159.66	1.12636	0.065209	0.949197	0.673468	0.742767	0.069689	0.881399	0.0437634	12	3	68.1929	26S protease regulatory subunit 8 OS=Mus musculus GN=Psmc5
P62264	Rps14	12072	12399.6	13022	12194.3	12530.9	12885.7	10278.8	10596.8	11156.4	9939.13	9927.56	10116.5	12497.9	12537	10677.4	9994.39	1.00313	0.937103	0.936036	0.167134	0.797194	0.0100259	0.854335	0.000130247	6	4	45.7006	40S ribosomal protein S14 OS=Mus musculus GN=Rps14
Q00612	G6pdx	5081.58	4725.25	5082.29	6305.97	6436.49	6748.41	6401.26	6347.48	6389.42	5443.25	5691.9	5344.84	4963.04	6496.95	6379.39	5493.33	1.30907	0.00662314	0.861107	0.0357339	0.845524	0.0119914	1.28538	0.00739594	15	4	95.3826	Glucose-6-phosphate 1-dehydrogenase X OS=Mus musculus GN=G6pdx
P62082	Rps7	27181.7	27155.3	25708	27528.7	29280.2	29244.9	31368.7	31341.9	31743.5	29748.9	29174.8	30213.6	26681.6	28684.6	31484.7	29712.4	1.07507	0.0943803	0.94371	0.0429679	1.03583	0.252696	1.18001	0.0179452	10	7	71.7286	40S ribosomal protein S7 OS=Mus musculus GN=Rps7
Q9D892	Itpa	4116.36	4226.32	3968.05	5359.88	4941.59	4846.57	2877.43	2633.57	2562.97	2233.39	2279.81	2577.22	4103.58	5049.35	2691.32	2363.47	1.23047	0.0320878	0.878182	0.137563	0.468075	0.00249484	0.655849	0.0063868	3	1	19.6205	Inosine triphosphate pyrophosphatase OS=Mus musculus GN=Itpa
Q8VDP4	Ccar2	973.98	979.564	1093.14	910.185	934.311	1001.32	1026.16	885.182	833.644	943.525	949.426	975.546	1015.56	948.606	914.997	956.166	0.934071	0.297099	1.04499	0.622483	1.00797	0.836031	0.900977	0.37133	5	2	22.0899	Cell cycle and apoptosis regulator protein 2 OS=Mus musculus GN=Ccar2
Q8BM75	Arid5b	1342.4	1234.18	895.143	436.025	313.721	335.668	497.717	413.875	205.8	1517.72	1370.57	1217.3	1157.24	361.805	372.464	1368.53	0.312644	0.0429816	3.67426	0.0102922	3.78252	0.00867248	0.321856	0.0147406	5	2	19.0906	AT-rich interactive domain-containing protein 5B OS=Mus musculus GN=Arid5b
O88696	Clpp	821.932	818.784	823.225	1037.58	1006.53	1028.66	729.419	743.492	781.633	572.532	790.705	924.52	821.314	1024.26	751.515	762.586	1.24709	0.00882639	1.01473	0.94325	0.744527	0.157542	0.915016	0.0460237	3	1	20.0034	Putative ATP-dependent Clp protease proteolytic subunit, mitochondrial OS=Mus musculus GN=Clpp
P53986	Slc16a1	10512.2	10938.1	11566.7	18113	18078	18926.8	12881.4	12466	13218	12280.5	12153.2	12769.5	11005.7	18372.6	12855.1	12401	1.66937	0.00170155	0.964676	0.259988	0.674975	0.00178451	1.16805	0.022417	9	5	69.4907	Monocarboxylate transporter 1 OS=Mus musculus GN=Slc16a1
P32883	Kras	1854.45	1894.63	2004.91	2221.56	2102.74	2154.6	2009.4	2282.54	2009.72	1453.09	1668.1	1713.82	1918	2159.63	2100.56	1611.67	1.12598	0.0334567	0.76726	0.043582	0.746271	0.0223117	1.09518	0.234551	4	1	27.6819	GTPase KRas OS=Mus musculus GN=Kras
Q60710	Samhd1	2422.69	2292.21	2026.33	1544.66	1279.06	1039.7	3562.52	3460.88	2477.26	4572.48	3117.55	4196.87	2247.07	1287.81	3166.89	3962.3	0.573104	0.0223494	1.25117	0.302653	3.07678	0.0309491	1.40934	0.0375646	14	2	73.6938	Deoxynucleoside triphosphate triphosphohydrolase SAMHD1 OS=Mus musculus GN=Samhd1
Q64433	Hspe1	46343.8	43309.4	45689.2	46015.5	49671.3	49691	49940.7	49559.3	50650.6	44108.8	45527.4	45768.4	45114.1	48459.2	50050.2	45134.9	1.07415	0.142564	0.901792	0.0154974	0.931399	0.125742	1.10941	0.0266002	21	14	117.85	10 kDa heat shock protein, mitochondrial OS=Mus musculus GN=Hspe1
P52480	Pkm	138112	135345	135966	121488	125458	123454	136483	136599	132866	136155	136821	135688	136474	123467	135316	136221	0.904687	0.0070606	1.00669	0.614055	1.10331	0.0127708	0.991513	0.460956	49	28	313.706	Pyruvate kinase PKM OS=Mus musculus GN=Pkm
P46978	Stt3a	8246.79	8159.42	8626.92	9369.08	8991.66	9086.65	8076.44	7856.13	8183.68	7491.36	7598.91	7489.18	8344.38	9149.13	8038.75	7526.48	1.09644	0.03081	0.936275	0.0537116	0.822645	0.008327	0.963373	0.0562493	12	5	65.8923	Dolichyl-diphosphooligosaccharide--protein glycosyltransferase subunit STT3A OS=Mus musculus GN=Stt3a
P26040	Ezr	19166.6	18465.4	18443.9	20092.8	20678.4	19752.3	22664.9	21517.9	21255.7	20882	20731.2	20570.5	18692	20174.5	21812.8	20727.9	1.07931	0.033748	0.950261	0.184748	1.02743	0.20395	1.16696	0.00233131	32	8	197.531	Ezrin OS=Mus musculus GN=Ezr
P42567	Eps15	573.271	615.495	571.629	452.596	410.855	305.037	671.381	624.556	590.425	442.348	372.198	442.817	586.798	389.496	628.787	419.121	0.663765	0.0648066	0.666555	0.0168073	1.07606	0.635634	1.07156	0.269226	4	1	16.129	Epidermal growth factor receptor substrate 15 OS=Mus musculus GN=Eps15
Q64669	Nqo1	2817.06	2976.18	3113.97	2564.08	2600.42	2621.63	4118.44	3884.82	4481.51	3672.64	3819.92	3915.97	2969.07	2595.38	4161.59	3802.84	0.874138	0.0749949	0.913796	0.229076	1.46524	0.0078691	1.40165	0.0109025	7	2	54.0721	NAD(P)H dehydrogenase [quinone] 1 OS=Mus musculus GN=Nqo1
Q9D3D9	Atp5d	17885.4	17652.9	17969.4	20654.7	20334.1	21307	15560.8	15441.6	15803.9	15731.5	15260.5	16710.3	17835.9	20765.2	15602.1	15900.8	1.16424	0.0176252	1.01914	0.63143	0.76574	0.00557864	0.874757	0.000544046	5	4	29.8295	ATP synthase subunit delta, mitochondrial OS=Mus musculus GN=Atp5d
P01901	H2-K1	343.324	352.245	269.519	163.63	123.92	52.385	314.35	399.108	173.411	519.67	549.047	532.378	321.696	113.311	295.623	533.699	0.352232	0.0231491	1.80534	0.112554	4.71001	0.010747	0.918952	0.499952	5	1	30.5071	H-2 class I histocompatibility antigen, K-B alpha chain OS=Mus musculus GN=H2-K1
P70691	Ugt1a2	2093.23	2260.61	1941.08	1152.33	1066.98	1047.51	1112.03	1323.14	1127.45	2003.55	2607.3	1891.62	2098.31	1088.94	1187.54	2167.49	0.518961	0.0152506	1.82519	0.0755333	1.99046	0.0567387	0.565952	0.00295893	12	2	64.521	UDP-glucuronosyltransferase 1-2 OS=Mus musculus GN=Ugt1a2
P62960	Ybx1	26001.4	26082.2	25282.8	25837.8	24728.5	24104.4	27211.2	27123.3	27925.2	29399.6	28589.6	29276.1	25788.8	24890.2	27419.9	29088.4	0.965156	0.268041	1.06085	0.0316946	1.16867	0.0137189	1.06325	0.0849502	13	5	89.5906	Nuclease-sensitive element-binding protein 1 OS=Mus musculus GN=Ybx1
Q61753	Phgdh	2472.98	2404.05	2410.8	3320.67	2618.35	3264.42	2665.26	2068.7	2311.77	2010.7	1956.34	2585.9	2429.28	3067.82	2348.58	2184.32	1.26285	0.147291	0.930059	0.639823	0.71201	0.0645242	0.966781	0.608592	9	3	42.665	D-3-phosphoglycerate dehydrogenase OS=Mus musculus GN=Phgdh
P10493	Nid1	29067.6	30256.2	32057	32523.5	31264.7	31508.5	32562.7	31785.2	32320.6	30151.1	29540.3	30870.3	30460.3	31765.6	32222.8	30187.3	1.04285	0.329598	0.936828	0.0439632	0.950314	0.0650209	1.05786	0.204014	22	9	129.812	Nidogen-1 OS=Mus musculus GN=Nid1
Q9QZE5	Copg1	4066.07	3990.24	3518.18	2928.1	2646.39	2203.04	2069.63	2259.15	1556.42	4928.96	4806.11	4048.15	3858.16	2592.51	1961.73	4594.41	0.671954	0.0269872	2.34201	0.0131793	1.77219	0.0137066	0.508463	0.010653	11	4	81.9012	Coatomer subunit gamma-1 OS=Mus musculus GN=Copg1
P63101	Ywhaz	154438	148025	144593	151355	151991	154326	157710	159350	154640	170611	171574	165046	149019	152557	157233	169077	1.02375	0.403912	1.07532	0.0356478	1.10828	0.0157523	1.05513	0.0830652	43	22	272.227	14-3-3 protein zeta/delta OS=Mus musculus GN=Ywhaz
P53994	Rab2a	4012.51	3816.34	3831.95	4031.08	3702.31	3855.35	3595.56	3125.01	3249.03	4245.97	4111.55	3760.34	3886.93	3862.91	3323.2	4039.29	0.993821	0.880548	1.21548	0.055595	1.04566	0.417656	0.854968	0.0264328	8	4	59.0703	Ras-related protein Rab-2A OS=Mus musculus GN=Rab2a
Q91VR2	Atp5c1	47592.7	48854.3	50364.3	56313.6	55683.6	57551.7	58798.1	60045.6	60753.4	51309.5	48409.1	51871	48937.1	56516.3	59865.7	50529.9	1.15488	0.0105027	0.844054	0.0200062	0.894076	0.0289681	1.22332	0.0012914	14	12	111.008	ATP synthase subunit gamma, mitochondrial OS=Mus musculus GN=Atp5c1
P11087	Col1a1	20845.5	21348.3	21405.5	39769.3	42766.1	44337.9	22168.7	21528.8	21657.2	24547.7	24082.6	25835.7	21199.7	42291.1	21784.9	24822	1.99489	0.0136067	1.13941	0.0473543	0.586933	0.00808359	1.0276	0.254174	37	13	247.383	Collagen alpha-1(I) chain OS=Mus musculus GN=Col1a1
Q9Z2U1	Psma5	4270.6	4245.48	4172.7	4722.23	4631.07	4472.08	4441.05	4595.48	4841.07	3855.31	3819.91	3778.61	4229.6	4608.46	4625.87	3817.94	1.08957	0.0457926	0.825346	0.0455913	0.828464	0.0128481	1.09369	0.108472	7	3	42.5139	Proteasome subunit alpha type-5 OS=Mus musculus GN=Psma5
P06795	Abcb1b	2724.79	2824.89	2880.53	3360.46	3274.4	3399.55	3179.91	3259.75	3171.65	3044.58	2969.29	3025.92	2810.07	3344.8	3203.77	3013.26	1.19029	0.00644003	0.940537	0.0261473	0.900879	0.00976408	1.1401	0.0179138	25	2	137.731	Multidrug resistance protein 1B OS=Mus musculus GN=Abcb1b
Q8CDN6	Txnl1	1317.91	1275.85	1158.44	1708.3	1453.92	1773.07	1552.22	1419.55	1665.21	1363.64	1596.06	1624.2	1250.73	1645.1	1545.66	1527.97	1.31531	0.0671886	0.988554	0.907108	0.928802	0.454317	1.2358	0.112883	3	2	16.5888	Thioredoxin-like protein 1 OS=Mus musculus GN=Txnl1
P05202	Got2	19438.3	19843.2	19447	20772.9	20144.6	18731.2	21297.2	21686.2	21006	19179.4	18631.9	18703.1	19576.2	19882.9	21329.8	18838.1	1.01567	0.719538	0.883185	0.00844209	0.947453	0.261139	1.08958	0.00259782	18	11	96.0401	Aspartate aminotransferase, mitochondrial OS=Mus musculus GN=Got2
Q8R1Q8	Dync1li1	2839.78	2944.15	2438.83	3145.08	2974.8	2953.23	2416.38	2568.64	2671.56	2570.09	2744.35	2837.34	2740.92	3024.37	2552.19	2717.26	1.10341	0.253836	1.06468	0.271831	0.898456	0.0588607	0.931144	0.481443	8	1	52.8941	Cytoplasmic dynein 1 light intermediate chain 1 OS=Mus musculus GN=Dync1li1
Q8JZN5	Acad9	4425.09	4607.51	4427.93	5089.09	5081.03	5529.2	4593.92	4176.7	4909.83	4412.03	4499.95	4635.25	4486.84	5233.11	4560.15	4515.74	1.16632	0.0478136	0.990262	0.890671	0.862918	0.0418539	1.01634	0.833143	7	1	35.6557	Acyl-CoA dehydrogenase family member 9, mitochondrial OS=Mus musculus GN=Acad9
P26150	Hsd3b3	1557.36	1887.99	1942.14	2513.38	2725.74	2507.49	2618.92	2719.37	2529.65	2536.92	2305.94	2272.04	1795.83	2582.2	2622.65	2371.63	1.43789	0.0235103	0.90429	0.12478	0.918454	0.162771	1.46041	0.0356407	10	2	53.9445	3 beta-hydroxysteroid dehydrogenase/Delta 5-->4-isomerase type 3 OS=Mus musculus GN=Hsd3b3
P17742	Ppia	153550	145135	151161	165407	168634	171479	207271	211198	206761	175454	174024	174655	149949	168507	208410	174711	1.12376	0.0176252	0.838305	0.00845997	1.03682	0.0886597	1.38988	0.00490439	28	14	155.676	Peptidyl-prolyl cis-trans isomerase A OS=Mus musculus GN=Ppia
Q6NZJ6	Eif4g1	7210.54	8065.71	8012.44	6312.36	6571.69	6683.36	5402.39	5862.44	5124.51	6626.24	6731.36	6718.3	7762.9	6522.47	5463.11	6691.97	0.840211	0.0603897	1.22494	0.0600134	1.02599	0.302686	0.703747	0.018498	20	7	105.757	Eukaryotic translation initiation factor 4 gamma 1 OS=Mus musculus GN=Eif4g1
Q8BIJ6	Iars2	994.124	1080.1	855.681	818.019	859.697	695.005	299.17	403.288	375.121	683.472	612.401	872.54	976.635	790.907	359.193	722.804	0.809829	0.132646	2.0123	0.0634361	0.913893	0.549617	0.367787	0.0115899	3	1	12.0082	Isoleucine--tRNA ligase, mitochondrial OS=Mus musculus GN=Iars2
Q6PDQ2	Chd4	3568.52	3680.58	3566.11	3449.33	3645.58	3802.58	3604.45	3458.33	3226.23	3322.01	3226.07	3683.82	3605.07	3632.5	3429.67	3410.63	1.00761	0.859047	0.994449	0.939844	0.938922	0.319058	0.951347	0.256545	9	2	47.3689	Chromodomain-helicase-DNA-binding protein 4 OS=Mus musculus GN=Chd4
Q9EPB4	Pycard	18183.7	16894	16665.5	15623.2	16587	15370.6	21266.2	20714.5	18876	22186.3	21728.2	20686.7	17247.7	15860.3	20285.6	21533.7	0.919559	0.127267	1.06153	0.301799	1.35772	0.00384551	1.17613	0.0197085	11	8	79.8178	Apoptosis-associated speck-like protein containing a CARD OS=Mus musculus GN=Pycard
Q9CUU3	Sycp2	181.898	156.655	144.278	209.168	144.612	134.603	342.477	456.746	520.685	427.027	311.457	390.512	160.944	162.794	439.969	376.332	1.0115	0.96141	0.85536	0.449198	2.3117	0.0196957	2.73369	0.0350747	7	1	30.4285	Synaptonemal complex protein 2 OS=Mus musculus GN=Sycp2
Q6ZQ38	Cand1	9620.59	9443.52	9254.47	7868.51	8154.83	7616.52	8898.85	8874.12	7976.71	9382.22	9188.69	9142.58	9439.52	7879.95	8583.23	9237.83	0.834783	0.00949954	1.07627	0.22334	1.17232	0.0128587	0.909286	0.0684172	28	8	172.888	Cullin-associated NEDD8-dissociated protein 1 OS=Mus musculus GN=Cand1
Q61335	Bcap31	11066.5	10807	11528.8	11780.5	12656.9	13455.7	14340.6	15402.4	15600.9	13244.7	13133.2	13250	11134.1	12631.1	15114.6	13209.3	1.13445	0.112514	0.873943	0.0759507	1.04578	0.399173	1.35751	0.00801735	7	3	54.4555	B-cell receptor-associated protein 31 OS=Mus musculus GN=Bcap31
Q9QYI3	Dnajc7	811.082	979.846	808.778	959.138	1005.29	823.882	1132.39	1063.05	900.343	768.098	900.543	753.29	866.569	929.437	1031.93	807.311	1.07255	0.52819	0.782334	0.107392	0.868602	0.201491	1.19082	0.161803	2	1	10.6958	DnaJ homolog subfamily C member 7 OS=Mus musculus GN=Dnajc7
P61982	Ywhag	15470.8	15575.1	14284.6	12873.2	14338.9	14098.9	14664.2	15326.4	15654.5	19721.1	20035.8	19173	15110.2	13770.3	15215.1	19643.3	0.911328	0.137734	1.29105	0.00585745	1.4265	0.00536735	1.00694	0.881976	28	8	190.351	14-3-3 protein gamma OS=Mus musculus GN=Ywhag
O70456	Sfn	3484.2	3659.59	3320.32	401.376	385.406	193.916	449.516	291.93	161.584	5903.48	5915.74	4454.66	3488.04	326.899	301.01	5424.63	0.0937202	0.00128315	18.0214	0.0269349	16.5942	0.0179244	0.0862978	0.012122	24	2	152.652	14-3-3 protein sigma OS=Mus musculus GN=Sfn
O08997	Atox1	10335.5	10535.7	10622.8	11471.7	12251.5	12707.5	11093.7	12203.8	11634.3	10837.1	9385.09	10077	10498	12143.6	11643.9	10099.7	1.15675	0.0683899	0.867384	0.0866453	0.831694	0.0365597	1.10916	0.0457107	2	2	15.0948	Copper transport protein ATOX1 OS=Mus musculus GN=Atox1
P14733	Lmnb1	63094.7	63103.6	63165.5	76033.7	74445.7	73516.7	71822.9	70743.8	70965.1	59475.7	60505.5	62306.2	63121.3	74665.4	71177.3	60762.5	1.18289	0.0146942	0.853678	0.014787	0.813797	0.00225808	1.12763	0.00157784	52	24	339.02	Lamin-B1 OS=Mus musculus GN=Lmnb1
Q61598	Gdi2	31294.9	32102.6	28456.6	22644.5	22128.6	19244.8	26747	25113.6	23309.9	35542.6	34552.5	32023.4	30618	21339.3	25056.8	34039.5	0.696952	0.0141103	1.35849	0.0175862	1.59516	0.0048553	0.818368	0.0158292	24	9	166.052	Rab GDP dissociation inhibitor beta OS=Mus musculus GN=Gdi2
P21271	Myo5b	596.081	706.952	796.792	584.984	614.815	488.054	266.224	254.818	263.53	412.114	562.025	538.311	699.942	562.618	261.524	504.15	0.803806	0.177815	1.92774	0.0700707	0.896079	0.430182	0.373637	0.0082434	8	1	34.2696	Unconventional myosin-Vb OS=Mus musculus GN=Myo5b
Q61166	Mapre1	7446.64	7514.57	8384.97	9305.47	8788.34	8289.77	8619.46	8880.39	8559.94	8391.32	7654.2	9369.17	7782.06	8794.53	8686.6	8471.57	1.1301	0.113233	0.975246	0.761985	0.963277	0.653668	1.11623	0.135309	8	4	62.684	Microtubule-associated protein RP/EB family member 1 OS=Mus musculus GN=Mapre1
P53395	Dbt	1789.53	2125.94	1725.49	1677.83	1466.56	1467.93	1983.71	1941.33	1643.93	2151.9	2144.07	2137.9	1880.32	1537.44	1856.32	2144.62	0.817648	0.13274	1.1553	0.172731	1.39493	0.0246319	0.987238	0.856302	3	2	17.0163	Lipoamide acyltransferase component of branched-chain alpha-keto acid dehydrogenase complex, mitochondrial OS=Mus musculus GN=Dbt
Q64213	Sf1	3634.92	3619.89	3681.35	3933.23	4043.14	4074.08	3266.9	2874.15	3527.13	3028.51	2407.91	2887.62	3645.39	4016.81	3222.72	2774.68	1.10189	0.0185765	0.860974	0.234981	0.690767	0.0318616	0.884055	0.148349	4	2	22.7654	Splicing factor 1 OS=Mus musculus GN=Sf1
P54728	Rad23b	4983.98	4963.67	4529.92	5239.07	5972.76	5955	6720.56	7704.21	6266.19	6355.36	5664.65	6343.74	4825.86	5722.27	6896.99	6121.25	1.18575	0.0748811	0.887525	0.274697	1.06972	0.342431	1.42917	0.0145871	8	3	68.9803	UV excision repair protein RAD23 homolog B OS=Mus musculus GN=Rad23b
P20152	Vim	322297	315836	307444	263059	255987	255647	347048	341450	329089	310254	303209	300954	315192	258231	339195	304805	0.819281	0.00690015	0.898613	0.0332634	1.18036	0.00226408	1.07615	0.00154805	98	47	541.455	Vimentin OS=Mus musculus GN=Vim
O70310	Nmt1	10740	11234.3	11638.6	12042.1	12377.2	12580	20269.1	22325.5	21980.2	13344.2	14270.8	14717	11204.3	12333.1	21524.9	14110.7	1.10075	0.0547852	0.65555	0.0104914	1.14413	0.0526185	1.92113	0.000685686	9	5	54.5865	Glycylpeptide N-tetradecanoyltransferase 1 OS=Mus musculus GN=Nmt1
Q91WJ8	Fubp1	1725.66	1481.6	1630.63	1713.5	1686.18	1580.36	1288.06	1438.53	1125.16	1321.27	1543.37	1468.38	1612.63	1660.01	1283.92	1444.34	1.02938	0.655695	1.12495	0.303321	0.870075	0.0830121	0.796163	0.154761	11	1	61.8041	Far upstream element-binding protein 1 OS=Mus musculus GN=Fubp1
P97494	Gclc	654.738	668.082	770.842	1040.7	916.902	1075.53	2943.84	3132.62	3058.73	2238.85	2104.69	2210.33	697.888	1011.04	3045.06	2184.62	1.44872	0.022735	0.717431	0.00585745	2.16076	0.00107909	4.36326	0.00115253	2	1	5.4401	Glutamate--cysteine ligase catalytic subunit OS=Mus musculus GN=Gclc
Q6R0H7	Gnas	1648.23	1189.24	1461.75	1207.99	1079.03	1169.39	1147.21	1054.49	1289.85	1163.99	1272.93	1182.89	1433.07	1152.14	1163.85	1206.61	0.803964	0.211839	1.03674	0.677564	1.04728	0.389726	0.812137	0.126695	17	2	108.655	Guanine nucleotide-binding protein G(s) subunit alpha isoforms XLas OS=Mus musculus GN=Gnas
P63276	Rps17	419.455	85.3095	29.8744	0	0	0	0	0	0	175.343	323.412	121.523	178.213	0	0	206.759	0	0.338434	Inf	0.125445	Inf	0.101457	0	0.0202029	1	1	6.7778	40S ribosomal protein S17 OS=Mus musculus GN=Rps17
P62141	Ppp1cb	178.177	226.566	133.783	0	0	0	56.9936	17.9788	38.7013	536.692	634.044	473.024	179.508	0	37.8913	547.92	0	0.0435582	14.4603	0.024122	Inf	0.0166537	0.211083	0.0675328	3	1	16.6461	Serine/threonine-protein phosphatase PP1-beta catalytic subunit OS=Mus musculus GN=Ppp1cb
Q8K0D5	Gfm1	3479.21	3203.84	3496.25	3734.32	3707.47	4136.25	2822.33	2793.39	3206.25	3134.95	3068.68	3001.43	3393.1	3859.35	2940.66	3068.35	1.13741	0.0928617	1.04343	0.520907	0.795045	0.0381142	0.866657	0.0557825	6	4	27.4294	Elongation factor G, mitochondrial OS=Mus musculus GN=Gfm1
P26339	Chga	1448.68	1489.72	1795.48	1636.29	1700.56	1846.58	2465.24	2552.76	2791.29	2477.56	2433.19	2358.18	1577.96	1727.81	2603.1	2422.98	1.09497	0.374193	0.930806	0.269327	1.40234	0.00712524	1.64966	0.00385162	6	2	40.863	Chromogranin-A OS=Mus musculus GN=Chga
Q9D6U8	Fam162a	664.379	719.049	758.301	301.961	264.399	301.788	820.91	828.627	913.033	888.993	631.856	682.291	713.91	289.383	854.19	734.38	0.405349	0.00685597	0.859738	0.337312	2.53775	0.0441413	1.1965	0.0125811	4	2	18.6876	Protein FAM162A OS=Mus musculus GN=Fam162a
P84089	Erh	3816.08	3749.88	3482.36	3922.16	4357.61	4174.2	4835.84	4952.68	5604.64	5829.77	5687.84	5600.72	3682.77	4151.32	5131.05	5706.11	1.12723	0.07887	1.11207	0.191586	1.37453	0.00631211	1.39326	0.0464243	3	2	26.3335	Enhancer of rudimentary homolog OS=Mus musculus GN=Erh
Q9JJU8	Sh3bgrl	1120.25	1153.89	1254.1	1083.5	1129.55	1007.2	920.361	976.426	592.01	1346.45	1319.22	1380.85	1176.08	1073.42	829.599	1348.84	0.912704	0.17731	1.6259	0.0866453	1.25659	0.0156531	0.705391	0.18954	1	1	7.5942	SH3 domain-binding glutamic acid-rich-like protein OS=Mus musculus GN=Sh3bgrl PE=3
Q9ERS2	Ndufa13	8039.99	8703.09	8457.86	7009.77	7239.38	6415.01	6929	7351.42	6570.77	8136.8	8516.44	7310.03	8400.31	6888.05	6950.39	7987.76	0.819976	0.0248759	1.14925	0.132222	1.15965	0.0969475	0.827397	0.0268454	7	3	39.5961	NADH dehydrogenase [ubiquinone] 1 alpha subcomplex subunit 13 OS=Mus musculus GN=Ndufa13
P53657	Pklr	9136.83	9097.43	9700.68	11362.8	11649	12503.5	8611.42	9306.27	9902.92	9397.66	9141.76	9332.22	9311.65	11838.4	9273.54	9290.55	1.27136	0.019951	1.00183	0.973499	0.784778	0.0263927	0.995908	0.862419	12	3	73.5974	Pyruvate kinase PKLR OS=Mus musculus GN=Pklr
P17427	Ap2a2	21113.5	21607.4	21339.8	21304.2	20438	21759.8	21245.8	20851.4	21092.6	17960.1	17831.3	17888.6	21353.6	21167.3	21063.3	17893.3	0.991279	0.741087	0.849505	0.00667319	0.845328	0.0250026	0.986406	0.376585	19	9	89.4506	AP-2 complex subunit alpha-2 OS=Mus musculus GN=Ap2a2
Q6P5F9	Xpo1	1056.26	1038.84	931.271	886.159	795.336	620.41	742.874	769.452	723.677	1623.16	1745.99	1557.06	1008.79	767.302	745.335	1642.07	0.760617	0.109735	2.20313	0.014787	2.14006	0.00550391	0.738841	0.00900734	9	2	44.856	Exportin-1 OS=Mus musculus GN=Xpo1
Q99PG2	Ogfr	235.274	213.01	297.834	344.703	287.043	252.223	767.698	613.498	635.352	498.633	554.895	541.687	248.706	294.656	672.183	531.739	1.18476	0.340716	0.791063	0.139328	1.80461	0.00991613	2.70272	0.0155558	5	1	21.0744	Opioid growth factor receptor OS=Mus musculus GN=Ogfr
Q3THS6	Mat2a	1758.79	1989.97	1885.96	1509.52	1629.9	1858.66	1594.18	1475.84	1517.89	1644.7	1834.03	1690.56	1878.24	1666.03	1529.3	1723.09	0.887016	0.219944	1.12672	0.0986082	1.03425	0.69579	0.814224	0.0722587	3	2	18.0546	S-adenosylmethionine synthase isoform type-2 OS=Mus musculus GN=Mat2a
Q63886	Ugt1a1	5698.45	5576.73	6062.84	5159.62	5050.03	4929.18	5559.04	5440.93	5383.53	5545.67	5734.98	5552.63	5779.34	5046.28	5461.17	5611.09	0.873158	0.0456976	1.02745	0.202905	1.11193	0.0101159	0.944947	0.215745	16	2	96.0942	UDP-glucuronosyltransferase 1-1 OS=Mus musculus GN=Ugt1a1
P26041	Msn	8567.32	8606.3	8150.62	8422.03	8458.12	9311.02	11810.2	11769	12423	9993.26	10139.3	9877.45	8441.41	8730.39	12000.7	10003.3	1.03423	0.500238	0.833562	0.0239394	1.14581	0.0608244	1.42165	0.00969738	28	7	205.069	Moesin OS=Mus musculus GN=Msn
P39447	Tjp1	1775.29	1952.63	1896.35	2587	2706.62	2628.98	1689.51	1600.18	1508.85	1393.44	1393.67	1518.2	1874.76	2640.87	1599.51	1435.11	1.40865	0.00491945	0.897215	0.120831	0.543422	0.000755146	0.853184	0.103007	8	3	36.7473	Tight junction protein ZO-1 OS=Mus musculus GN=Tjp1
Q8BRB7	Kat6b	985.501	808.146	736	610.124	517.493	461.246	650.492	461.056	602.525	1361.37	1580.96	1423.05	843.215	529.621	571.358	1455.13	0.628097	0.0585134	2.54679	0.0072143	2.74749	0.00358921	0.677594	0.0646484	4	1	18.8566	Histone acetyltransferase KAT6B OS=Mus musculus GN=Kat6b
P17225	Ptbp1	1978	2063.07	2079.5	2212.88	2189.82	2282.13	2131.07	2061.81	2265.6	1619.81	1756.96	1908.27	2040.19	2228.28	2152.83	1761.68	1.09219	0.0282379	0.81831	0.0536865	0.790602	0.0363896	1.05521	0.188585	13	2	87.5437	Polypyrimidine tract-binding protein 1 OS=Mus musculus GN=Ptbp1
P45376	Akr1b1	15490.7	15574.8	16329.7	16273.5	16768.5	16808	15541.7	16842.8	16388.4	15305.9	15194.6	15502.5	15798.4	16616.6	16257.6	15334.4	1.05179	0.110562	0.94321	0.191711	0.922831	0.0162009	1.02907	0.373123	15	7	66.3838	Aldose reductase OS=Mus musculus GN=Akr1b1
Q9DCT2	Ndufs3	19765.3	20289.3	19156.7	5259.1	5227.27	4343.27	6664.54	7018.01	5449.14	21080.9	21171.4	18176.5	19737.1	4943.21	6377.23	20142.9	0.250452	0.000815691	3.15857	0.0104914	4.07486	0.00770027	0.323108	0.00291064	4	3	29.9476	NADH dehydrogenase [ubiquinone] iron-sulfur protein 3, mitochondrial OS=Mus musculus GN=Ndufs3
Q9Z0Z4	Heph	1408.01	1477.18	1456.05	2276.62	2193.07	2092.51	1641.37	1883.48	1637.57	1448.95	1270.79	1359.81	1447.08	2187.4	1720.81	1359.85	1.5116	0.00968142	0.790241	0.0600134	0.621676	0.00279974	1.18916	0.0443457	6	2	34.8726	Hephaestin OS=Mus musculus GN=Heph
Q59J78	Ndufaf2	1178.69	1032.38	874.246	850.725	1112.25	1058.26	1185.07	1278.73	1420.07	974.83	988.113	1050.35	1028.44	1007.08	1294.63	1004.43	0.979228	0.895298	0.775845	0.0775346	0.99737	0.9786	1.25882	0.232902	2	1	15.4881	Mimitin, mitochondrial OS=Mus musculus GN=Ndufaf2
P19157	Gstp1	52527.8	52338.1	51937.1	47298.2	44671.4	43825	68223.3	66633.7	63220.4	70922.9	68851	68666.5	52267.7	45264.8	66025.8	69480.1	0.86602	0.0403068	1.05232	0.191422	1.53497	0.00153346	1.26322	0.00669557	16	10	133.198	Glutathione S-transferase P 1 OS=Mus musculus GN=Gstp1
Q99LJ0	Cttnbp2nl	9108.07	9201.45	8945.93	9620.09	9502.82	9428.57	7787.11	7156.19	7714.77	7222.56	7203	7299.85	9085.15	9517.16	7552.69	7241.8	1.04755	0.0287825	0.958838	0.331352	0.760921	0.000912042	0.831323	0.0304272	7	4	30.3851	CTTNBP2 N-terminal-like protein OS=Mus musculus GN=Cttnbp2nl
Q3UW53	Fam129a	2964.15	3071.39	3191.68	3192.78	3465.67	3604.14	2813.28	2839.72	2758.67	2559.03	2832.32	2811.76	3075.74	3420.86	2803.89	2734.37	1.11221	0.126056	0.975205	0.590689	0.799322	0.0239138	0.911616	0.0805508	14	4	70.3311	Protein Niban OS=Mus musculus GN=Fam129a
Q8JZK9	Hmgcs1	1613.88	1573.8	1646.98	1925.36	1875.79	1831.38	1610.67	1669.32	1382.48	1731.61	1477.57	1554.58	1611.55	1877.51	1554.16	1587.92	1.16503	0.00934692	1.02172	0.823822	0.84576	0.069958	0.964387	0.630805	15	2	104.186	Hydroxymethylglutaryl-CoA synthase, cytoplasmic OS=Mus musculus GN=Hmgcs1
Q78PY7	Snd1	2735.33	2491.81	2818.08	3331.29	3337.47	3024.27	3508.8	3484.89	3959.07	2880.58	3182.29	2976.5	2681.74	3231.01	3650.92	3013.12	1.20482	0.0388189	0.825306	0.0694038	0.932564	0.224666	1.3614	0.00909322	15	2	76.6472	Staphylococcal nuclease domain-containing protein 1 OS=Mus musculus GN=Snd1
Q8VC28	Akr1c13	2943	2860.33	3196.48	3972.44	4015.08	4424.3	4394.46	4706.3	4926.04	4474.92	4552.77	4666.09	2999.94	4137.27	4675.6	4564.59	1.37912	0.0152836	0.976258	0.627209	1.10329	0.109255	1.55857	0.00412212	11	4	52.443	Aldo-keto reductase family 1 member C13 OS=Mus musculus GN=Akr1c13
Q8JZQ9	Eif3b	2598.15	2923.3	3197.45	3439.25	3072.27	3302.24	2913.56	3045.7	3240.69	2777.43	2629.78	2515.21	2906.3	3271.25	3066.65	2640.81	1.12557	0.211839	0.861137	0.0600134	0.807276	0.022467	1.05517	0.202947	15	2	84.642	Eukaryotic translation initiation factor 3 subunit B OS=Mus musculus GN=Eif3b
P62984	Uba52	256688	249039	230839	270431	262989	245802	248948	252096	230725	248949	246869	248084	245522	259741	243923	247968	1.05791	0.308307	1.01658	0.671387	0.954674	0.289196	0.993487	0.668784	38	27	137.508	Ubiquitin-60S ribosomal protein L40 OS=Mus musculus GN=Uba52
Q8R5J9	Arl6ip5	1605.58	1386.25	1529.09	1610.09	1614.86	1044.35	2705.95	1930.75	2009.44	2067.76	2165.19	1684.69	1506.97	1423.1	2215.38	1972.55	0.944347	0.758765	0.890388	0.531737	1.38609	0.115096	1.47009	0.0377883	3	2	16.7129	PRA1 family protein 3 OS=Mus musculus GN=Arl6ip5
Q9WUM5	Suclg1	11596.1	11014.7	10136.2	10015.2	11956.5	11261.2	17303.6	17491.6	18154.2	14113.6	13871.7	13591.6	10915.7	11077.6	17649.8	13858.9	1.01484	0.867878	0.785219	0.00844209	1.25107	0.0500354	1.61692	0.0121388	8	5	42.9372	Succinyl-CoA ligase [ADP/GDP-forming] subunit alpha, mitochondrial OS=Mus musculus GN=Suclg1
P61087	Ube2k	487.302	414.321	340.325	750.278	761.964	829.451	308.046	341.387	253.943	288.844	391.503	309.568	413.983	780.564	301.125	329.972	1.8855	0.0144717	1.09579	0.590689	0.422735	0.00301328	0.727386	0.0552757	3	1	17.2318	Ubiquitin-conjugating enzyme E2 K OS=Mus musculus GN=Ube2k
Q9D8U8	Snx5	2628.98	2558.08	2423.45	3303.25	2721.47	2851.18	2833.23	2531.84	2906.5	2528.55	2544.83	2199.5	2536.84	2958.64	2757.19	2424.29	1.16627	0.175253	0.879263	0.16373	0.819396	0.0993855	1.08686	0.27763	3	3	17.3081	Sorting nexin-5 OS=Mus musculus GN=Snx5
Q922Q8	Lrrc59	2836.43	2645.44	2964.05	2829.83	2865.29	3050.73	2231.46	2404.47	2522.46	1794.29	1952.88	1950.76	2815.3	2915.28	2386.13	1899.31	1.03551	0.498448	0.795978	0.0370323	0.6515	0.00294596	0.847557	0.0580554	5	1	17.6441	Leucine-rich repeat-containing protein 59 OS=Mus musculus GN=Lrrc59
P48771	Cox7a2	1082.9	1242.61	1103.68	203.749	175.319	90.5686	62.6339	184.83	70.7431	944.6	848.15	816.442	1143.06	156.546	106.069	869.731	0.136953	0.00295917	8.19967	0.0045108	5.55576	0.00182457	0.0927935	0.0140111	2	1	10.3532	Cytochrome c oxidase subunit 7A2, mitochondrial OS=Mus musculus GN=Cox7a2
Q99JX3	Gorasp2	363.619	345.308	392.115	212.376	234.311	212.11	464.643	485.359	481.976	487.802	330.747	582.314	367.014	219.599	477.326	466.954	0.59834	0.0101738	0.978272	0.924559	2.1264	0.102225	1.30057	0.0220293	6	1	32.2371	Golgi reassembly-stacking protein 2 OS=Mus musculus GN=Gorasp2
P06151	Ldha	159513	158811	154259	162189	161033	160670	192263	195365	191564	184078	184322	181064	157528	161298	193064	183155	1.02393	0.189363	0.948674	0.0172426	1.13551	0.00324579	1.22559	0.0018695	50	34	238.007	L-lactate dehydrogenase A chain OS=Mus musculus GN=Ldha
Q9DCS3	Mecr	2262.54	2213.49	1748.84	1602.94	1712.68	1344.82	2127.21	1999.42	1548.47	2656.57	2588.51	2212.45	2074.96	1553.48	1891.7	2485.84	0.74868	0.102533	1.31408	0.10468	1.60018	0.0164658	0.911682	0.0327861	4	2	26.7554	Trans-2-enoyl-CoA reductase, mitochondrial OS=Mus musculus GN=Mecr
O35685	Nudc	3899.59	4568.5	4346.84	4640.41	4280.27	4663.68	3958.35	4180.7	4176.69	3350.91	3428.34	3329.31	4271.64	4528.12	4105.25	3369.52	1.06004	0.40142	0.820783	0.0200062	0.744132	0.0182658	0.961047	0.333149	7	2	31.6118	Nuclear migration protein nudC OS=Mus musculus GN=Nudc
Q9D1D4	Tmed10	2957.22	2861.14	2654.66	573.021	648.719	308.078	1288.55	1403.73	1179.82	2870.67	2768.52	2392.78	2824.34	509.94	1290.7	2677.32	0.180552	0.00198798	2.07432	0.0200062	5.25027	0.00301328	0.456992	0.00218073	8	2	47.4135	Transmembrane emp24 domain-containing protein 10 OS=Mus musculus GN=Tmed10
Q6PHN9	Rab35	2696.09	2850.86	2410.69	3243.4	3159.95	3282.99	3018.38	2799.38	2876.95	2177.98	2354.67	2285.83	2652.55	3228.78	2898.24	2272.83	1.21724	0.0677442	0.784211	0.0127658	0.703928	0.00207608	1.09262	0.25562	11	1	56.7003	Ras-related protein Rab-35 OS=Mus musculus GN=Rab35
Q6IFX2	Krt42	5372.28	5815.25	5714.97	5622.61	5190.93	5643.9	5603.16	5608.01	6048.88	5983.98	5872.13	5693.21	5634.17	5485.81	5753.35	5849.77	0.973669	0.555797	1.01676	0.673315	1.06634	0.148716	1.02115	0.545255	42	5	222.587	Keratin, type I cytoskeletal 42 OS=Mus musculus GN=Krt42
P70124	Serpinb5	15642.8	15337.2	15787.7	15864.9	15314.2	15700.4	16715.1	16985.1	15668.8	15541.1	14851.1	16052.5	15589.2	15626.5	16456.3	15481.6	1.00239	0.896232	0.94077	0.20596	0.990726	0.761706	1.05562	0.238641	12	8	80.8273	Serpin B5 OS=Mus musculus GN=Serpinb5
Q9JHI5	Ivd	1931.93	2021.08	1887.32	2282.26	2390.62	2451.13	2291.09	2054.5	2337.65	2020.49	2067.08	2136.36	1946.78	2374.67	2227.75	2074.64	1.21979	0.0119224	0.931275	0.287619	0.873655	0.0211732	1.14432	0.155591	11	2	67.6479	Isovaleryl-CoA dehydrogenase, mitochondrial OS=Mus musculus GN=Ivd
P62071	Rras2	1475.43	1673.39	1914.1	1809.82	1647.72	1526.49	1923.54	1413.18	1649.75	1221.83	1071.57	1267.92	1687.64	1661.34	1662.16	1187.11	0.984419	0.898958	0.714198	0.115128	0.714546	0.0232242	0.984899	0.912997	3	1	23.2597	Ras-related protein R-Ras2 OS=Mus musculus GN=Rras2
Q9CQV8	Ywhab	45269.1	44132.9	43849.5	44785.3	45536.6	45780.2	48956.4	46961.3	46902.2	50463.7	50029.9	48363.2	44417.2	45367.4	47606.6	49618.9	1.02139	0.204893	1.04227	0.150879	1.09371	0.0219986	1.07181	0.00471737	30	7	236.63	14-3-3 protein beta/alpha OS=Mus musculus GN=Ywhab
Q9JLQ0	Cd2ap	1668.57	1598.95	1231.95	709.615	753.615	765.935	1110.59	911.611	523.564	1243.19	1519.94	1235.61	1499.82	743.055	848.59	1332.92	0.495428	0.0547852	1.57074	0.140251	1.79383	0.0362072	0.565793	0.0437414	7	3	32.6282	CD2-associated protein OS=Mus musculus GN=Cd2ap
Q80X50	Ubap2l	1392.54	1437.86	1456.31	1506.38	1365.79	1332.62	1636.44	1670.7	1671.88	1170.15	1361.98	1308.83	1428.91	1401.6	1659.67	1280.32	0.980889	0.722213	0.771431	0.0474775	0.913474	0.233886	1.1615	0.00201833	3	2	15.3571	Ubiquitin-associated protein 2-like OS=Mus musculus GN=Ubap2l
P62259	Ywhae	74606.6	77033	75376.6	72366	70128.8	71627.3	90490.5	88144.7	87826.8	92572.1	91565.7	93703.8	75672.1	71374.1	88820.7	92613.9	0.943202	0.0287741	1.04271	0.0578028	1.29758	0.000657205	1.17376	0.011352	40	18	282.496	14-3-3 protein epsilon OS=Mus musculus GN=Ywhae
P24472	Gsta4	11661.5	11368.5	11624.6	11930.6	11479.1	11639.7	16284.6	16088	18082.5	14028.8	13048.9	13670.3	11551.5	11683.2	16818.4	13582.6	1.01139	0.5245	0.807609	0.0529199	1.16258	0.0222651	1.45594	0.00813307	12	7	81.0989	Glutathione S-transferase A4 OS=Mus musculus GN=Gsta4
Q9CPQ1	Cox6c	19349.8	19910.3	18474.4	17232.6	17294.3	17617.9	23204.2	23362.8	23445.7	23789.2	24137.8	23621.3	19244.8	17381.6	23337.6	23849.4	0.903183	0.0677442	1.02193	0.104694	1.37211	0.000411535	1.21267	0.0143018	18	9	113.496	Cytochrome c oxidase subunit 6C OS=Mus musculus GN=Cox6c
P67984	Rpl22	18801.8	18773.3	19282.6	20607.8	20062.8	20228.6	17891.2	18197	19527	16459.8	16347	15944.1	18952.5	20299.7	18538.4	16250.3	1.07108	0.0153458	0.876574	0.0716571	0.800517	0.00106011	0.978149	0.343078	6	4	27.423	60S ribosomal protein L22 OS=Mus musculus GN=Rpl22
Q62418	Dbnl	2070.42	1940.02	2071.37	2755.03	2956.71	2843.62	3104.67	3134.18	3395.94	2306.15	2361.7	2370.56	2027.27	2851.78	3211.6	2346.14	1.40671	0.00477749	0.73052	0.0299558	0.82269	0.0170606	1.5842	0.00358913	9	3	55.6092	Drebrin-like protein OS=Mus musculus GN=Dbnl
Q9QZQ8	H2afy	3331.68	3380.57	3355.21	2818.79	2932.59	2838.13	1609.72	1940.97	1816.36	1777.58	1786.74	1624.19	3355.82	2863.17	1789.02	1729.5	0.853195	0.00927742	0.966735	0.685542	0.604053	0.00178451	0.533109	0.00636106	7	3	40.5895	Core histone macro-H2A.1 OS=Mus musculus GN=H2afy
Q9WVK4	Ehd1	1997.88	1676.03	1617.82	1567.39	1529.21	1315.17	1669.54	1779.92	1658.3	1964.02	2018.07	1608.82	1763.91	1470.59	1702.59	1863.64	0.833711	0.164063	1.09459	0.414029	1.26727	0.0970969	0.965234	0.713717	12	2	59.2906	EH domain-containing protein 1 OS=Mus musculus GN=Ehd1
P14115	Rpl27a	2347.46	2378.45	2371.37	1813.24	1489.05	1868.79	2241.47	2127.66	2162.61	2000.35	1907.28	1736.06	2365.76	1723.69	2177.25	1881.23	0.7286	0.0589033	0.86404	0.0851064	1.09139	0.380996	0.920316	0.0499783	2	1	11.7649	60S ribosomal protein L27a OS=Mus musculus GN=Rpl27a
Q99MN9	Pccb	5216.97	5146.99	4967.22	5855.96	5571.78	5435.68	5841.13	5810.07	5509.79	5853.47	5306.1	5472.27	5110.39	5621.14	5720.33	5543.95	1.09994	0.0611826	0.969165	0.498917	0.986267	0.755854	1.11935	0.00201206	11	5	62.9372	Propionyl-CoA carboxylase beta chain, mitochondrial OS=Mus musculus GN=Pccb
Q60932	Vdac1	39169.6	38554.6	39294.6	39591.1	38489.1	38228.3	39727.1	40251.6	39582.9	38976.6	39582.5	37869.1	39006.3	38769.5	39853.9	38809.4	0.99393	0.707336	0.973792	0.227385	1.00103	0.958037	1.02173	0.188799	18	14	161.3	Voltage-dependent anion-selective channel protein 1 OS=Mus musculus GN=Vdac1
Q920B9	Supt16h	3653.07	3380.01	3515.81	3539.57	3282.22	3511.33	5334.52	4263.95	4691.58	5255.94	5157.58	5437.73	3516.3	3444.37	4763.35	5283.75	0.979545	0.619256	1.10925	0.304379	1.53402	0.00142941	1.35465	0.0196098	20	6	95.2631	FACT complex subunit SPT16 OS=Mus musculus GN=Supt16h
Q8BJW6	Eif2a	3574.69	3958.85	4078.81	3822.85	3808.51	4090.48	2590.64	2285.26	2654.14	2825.24	2808.84	2631.37	3870.78	3907.28	2510.01	2755.15	1.00943	0.883281	1.09766	0.217434	0.705133	0.00456497	0.64845	0.0221895	12	4	47.1948	Eukaryotic translation initiation factor 2A OS=Mus musculus GN=Eif2a
Q8BGQ7	Aars	299.65	341.831	336.629	124.867	167.042	165.977	362.547	306.895	420.23	394.581	326.593	376.098	326.037	152.629	363.224	365.757	0.468134	0.0059778	1.00697	0.963667	2.39638	0.00661931	1.11406	0.435823	12	1	69.4784	Alanine--tRNA ligase, cytoplasmic OS=Mus musculus GN=Aars
Q3UMR5	Mcu	4835.24	4845.23	4927.32	5064.49	5175.65	4919.61	5609	4950.88	5272.5	4970.02	5075.02	5033.74	4869.26	5053.25	5277.46	5026.26	1.03779	0.163316	0.952401	0.393578	0.994659	0.788174	1.08383	0.166039	12	4	61.7333	Calcium uniporter protein, mitochondrial OS=Mus musculus GN=Mcu
Q9CYZ2	Tpd52l2	2624.48	2771.35	2611.86	2504.27	2558.6	2957.53	2336.04	2337.05	2234.42	2094.64	1928.18	2172.89	2669.23	2673.47	2302.5	2065.24	1.00159	0.984702	0.896953	0.108363	0.772493	0.0506637	0.862609	0.0117592	3	2	13.6297	Tumor protein D54 OS=Mus musculus GN=Tpd52l2
P09803	Cdh1	18967.6	18474.1	19090.7	18192.9	18816.8	19261.8	22541.8	22309.6	22042.1	21152.4	21399.4	21146.4	18844.1	18757.2	22297.8	21232.7	0.995385	0.861615	0.952234	0.0250899	1.13198	0.0223177	1.18328	0.00603421	15	11	84.8385	Cadherin-1 OS=Mus musculus GN=Cdh1
Q62465	Vat1	16233.7	15884	14982.4	15499.8	14484.3	14851.4	13817.5	14933.5	14608.8	14532.5	14258.1	13308.1	15700	14945.2	14453.3	14032.9	0.951921	0.24639	0.970914	0.524321	0.938956	0.163878	0.920588	0.178643	13	6	73.0065	Synaptic vesicle membrane protein VAT-1 homolog OS=Mus musculus GN=Vat1
Q6AW69	Cgnl1	3412.65	3517.13	3412.22	3429.93	3879	3461.43	4031.64	4071.89	3478.56	3867.62	4128.02	4335.81	3447.34	3590.12	3860.7	4110.48	1.04142	0.490825	1.0647	0.430008	1.14494	0.0821815	1.11991	0.138339	6	2	22.6832	Cingulin-like protein 1 OS=Mus musculus GN=Cgnl1
P99024	Tubb5	6184.84	6592.13	5316.12	729.672	984.65	559.692	1079.23	668.001	266.265	6075.44	7521.95	4138.69	6031.03	758.005	671.164	5912.03	0.125684	0.0108936	8.80861	0.061281	7.79946	0.0504344	0.111285	0.0229628	19	1	162.141	Tubulin beta-5 chain OS=Mus musculus GN=Tubb5
Q8BP40	Acp6	2805.97	2997.76	2818.53	1927.48	1851.89	2025.95	3109.35	2915.25	2548.41	3146.03	3034.45	2709.44	2874.09	1935.11	2857.67	2963.3	0.673295	0.0040939	1.03696	0.7027	1.53134	0.0186172	0.994288	0.897587	11	3	57.6883	Lysophosphatidic acid phosphatase type 6 OS=Mus musculus GN=Acp6
Q922Q1	Marc2	7142.68	7085.56	7563.8	7935.28	8006.22	8296.4	6756.75	6937.16	6782.9	6087.61	6116.5	6258.35	7264.02	8079.3	6825.6	6154.15	1.11224	0.0331266	0.901628	0.00928918	0.761719	0.00389357	0.939646	0.136345	7	4	50.1773	Mitochondrial amidoxime reducing component 2 OS=Mus musculus GN=Marc2
Q9Z2G9	Htatip2	904.851	979.706	773.126	814.718	1339.29	849.388	846.222	742.831	647.418	552.677	817.316	765.692	885.894	1001.13	745.49	711.895	1.13008	0.632124	0.954935	0.797989	0.71109	0.266176	0.841512	0.103148	4	1	20.9431	Oxidoreductase HTATIP2 OS=Mus musculus GN=Htatip2
Q91VM9	Ppa2	18669	19023.9	18352.2	17273.2	16958.2	15552.9	18663.1	17959.6	17699.7	17024.5	17179.4	16661.3	18681.7	16594.8	18107.4	16955	0.888291	0.0762486	0.936358	0.0746871	1.02171	0.615178	0.969261	0.201224	6	5	46.9168	Inorganic pyrophosphatase 2, mitochondrial OS=Mus musculus GN=Ppa2
Q3UTJ2	Sorbs2	582.873	595.9	655.77	486.964	659.027	721.849	1022.4	810.458	849.872	675.916	609.388	469.535	611.514	622.613	894.244	584.946	1.01815	0.916314	0.654124	0.0580905	0.939502	0.737281	1.46234	0.0569944	5	1	24.4243	Sorbin and SH3 domain-containing protein 2 OS=Mus musculus GN=Sorbs2
Q571I9	Aldh16a1	1523.39	1367.73	1579.6	1744.76	2175.79	1965.16	2455.2	2424.95	2331.15	2029.15	2264.35	2118.03	1490.24	1961.9	2403.77	2137.18	1.3165	0.0744411	0.889095	0.0779326	1.08934	0.347255	1.61301	0.0119774	5	2	31.3398	Aldehyde dehydrogenase family 16 member A1 OS=Mus musculus GN=Aldh16a1
Q8CI51	Pdlim5	1912.62	1944.03	2062.32	1339.16	1503.79	1234.52	2215.14	2188.99	1624.19	2093.03	2274.51	1910.87	1972.99	1359.15	2009.44	2092.8	0.68888	0.0176252	1.04149	0.777813	1.53978	0.0149497	1.01847	0.949379	9	3	46.7973	PDZ and LIM domain protein 5 OS=Mus musculus GN=Pdlim5
Q9D0R2	Tars	12179.7	11456.7	11370.4	10971.5	11159.2	10830	13643.9	13791.1	13621	14048.3	14317.9	12915.8	11669	10986.9	13685.3	13760.7	0.941551	0.147075	1.0055	0.907108	1.25246	0.0332168	1.1728	0.0204379	19	6	112.647	Threonine--tRNA ligase, cytoplasmic OS=Mus musculus GN=Tars
P08228	Sod1	80008.8	80844.9	83593.3	99355.8	96424.9	97385.6	98351.6	93363.2	96663.1	89879.6	88223.2	88627.4	81482.4	97722.1	96126	88910.1	1.1993	0.00422547	0.924933	0.0623903	0.909826	0.00810731	1.17972	0.0151959	19	10	85.9189	Superoxide dismutase [Cu-Zn] OS=Mus musculus GN=Sod1
E9Q557	Dsp	51421.8	51258.6	51819.2	55509.2	54293.6	55804.1	53797.6	53862.2	53034.4	48587.2	47913.8	47610.1	51499.9	55202.3	53564.7	48037	1.07189	0.0234382	0.896803	0.0044864	0.8702	0.00321738	1.04009	0.0404906	106	30	567.447	Desmoplakin OS=Mus musculus GN=Dsp
Q64475	Hist1h2bb	128594	129391	130070	112971	117578	118899	168138	171691	170051	173809	177616	175258	129352	116483	169960	175561	0.900512	0.0334567	1.03296	0.0510286	1.50718	0.000923599	1.31393	0.000325465	41	9	107.759	Histone H2B type 1-B OS=Mus musculus GN=Hist1h2bb
Q9Z2I0	Letm1	26227	26167.3	25622.7	29251.5	28325.1	26860.9	27037.7	26486.2	25895.9	25642.7	24727.9	26188.4	26005.7	28145.8	26473.3	25519.7	1.0823	0.123	0.963978	0.221763	0.906695	0.0624962	1.01798	0.108689	26	13	162.944	LETM1 and EF-hand domain-containing protein 1, mitochondrial OS=Mus musculus GN=Letm1
Q9ERU9	Ranbp2	802.537	743.921	737.492	656.429	849.669	741.047	737.455	687.793	707.701	670.209	712.345	620.272	761.316	749.048	710.983	667.609	0.983886	0.885526	0.938994	0.318499	0.891276	0.329734	0.933886	0.0373551	9	1	37.2708	E3 SUMO-protein ligase RanBP2 OS=Mus musculus GN=Ranbp2
P08032	Spta1	6315.71	6351.57	5945.61	6335.78	5528.09	6046.01	4593.25	3534.24	3776.62	5708.3	5653.64	5528.88	6204.3	5969.96	3968.03	5630.27	0.96223	0.506221	1.41891	0.0673206	0.943101	0.330369	0.639562	0.0279217	79	10	423.089	Spectrin alpha chain, erythrocytic 1 OS=Mus musculus GN=Spta1
Q6PDM2	Srsf1	9542.76	10046.5	10203.5	12386.2	11793.8	12571.9	15147.4	15065.8	15309.3	12155.3	12807.4	12550.3	9930.9	12250.6	15174.2	12504.3	1.23359	0.00925182	0.824053	0.0130209	1.02071	0.492707	1.52797	0.00196959	17	8	123.851	Serine/arginine-rich splicing factor 1 OS=Mus musculus GN=Srsf1
Q3TES0	Iqsec3	2903.11	2558.66	2367.19	3404.65	3823.89	3569.18	3394.87	3322.81	3225.65	3019.41	2626	2791.41	2609.65	3599.24	3314.44	2812.27	1.3792	0.0235103	0.848491	0.0681047	0.781352	0.0197613	1.27007	0.0329875	10	2	39.4893	IQ motif and SEC7 domain-containing protein 3 OS=Mus musculus GN=Iqsec3
P57016	Lad1	5666.64	5489.22	5946.92	5251.6	5618.34	5628.82	5866.54	5880.23	5526.67	6081.81	5608.82	5622.92	5700.93	5499.59	5757.81	5771.18	0.964682	0.390409	1.00232	0.962788	1.04938	0.289039	1.00998	0.836098	20	7	99.8423	Ladinin-1 OS=Mus musculus GN=Lad1
P54823	Ddx6	264.007	258.889	262.133	38.7226	75.6579	2.59384	189.771	162.226	139.99	608.25	263.639	435.68	261.676	38.9915	163.996	435.856	0.149007	0.0232969	2.65773	0.166057	11.1783	0.0742778	0.626712	0.0311564	6	1	31.4358	Probable ATP-dependent RNA helicase DDX6 OS=Mus musculus GN=Ddx6
Q9DBH5	Lman2	7546.74	7764.25	7600.77	9628.68	9318.93	8996.03	8022.06	8185.67	7907.64	8602.2	8804.13	8350.82	7637.25	9314.55	8038.46	8585.72	1.21962	0.0195569	1.06808	0.0672858	0.921753	0.0551359	1.05253	0.014652	6	4	41.5603	Vesicular integral-membrane protein VIP36 OS=Mus musculus GN=Lman2
Q8R2Y0	Abhd6	1529.95	1252.25	1278.77	2283.52	1953.71	1859.6	993.332	1068.23	806.174	1658.08	1618.06	1427.09	1353.66	2032.27	955.913	1567.74	1.50132	0.0347812	1.64005	0.0203373	0.771422	0.0698802	0.70617	0.0677796	3	3	16.5366	Monoacylglycerol lipase ABHD6 OS=Mus musculus GN=Abhd6
P58044	Idi1	3667.2	3661.66	3758.4	4448.81	4442.37	4050.06	3168.34	3585.39	3353.17	3278.83	2999.73	2925.73	3695.75	4313.75	3368.96	3068.1	1.16722	0.0657733	0.910695	0.200688	0.711237	0.00769449	0.911578	0.129718	2	2	11.8384	Isopentenyl-diphosphate Delta-isomerase 1 OS=Mus musculus GN=Idi1
Q9WTM5	Ruvbl2	7546.64	7696.83	7048.86	8122.53	7994.43	7950.84	9556.54	8947.82	8227.33	9844.82	10048.7	9324.24	7430.78	8022.6	8910.56	9739.27	1.07964	0.127267	1.093	0.217434	1.21398	0.023303	1.19914	0.0230283	17	4	97.1486	RuvB-like 2 OS=Mus musculus GN=Ruvbl2
Q9Z1Z2	Strap	974.382	968	1081.51	1459.58	1487.31	1532.56	1038.4	1098.02	1144.93	922.382	845.05	896.881	1007.96	1493.15	1093.79	888.104	1.48135	0.00682854	0.811955	0.0267246	0.594787	0.000915766	1.08514	0.0646821	11	2	61.3317	Serine-threonine kinase receptor-associated protein OS=Mus musculus GN=Strap
Q9QYB1	Clic4	1801.86	1995.26	2132.1	2127.3	2602.42	2534.39	5936.47	5738.49	6186.75	4569.72	4097.09	4402.11	1976.41	2421.37	5953.9	4356.31	1.22514	0.115686	0.731673	0.00977514	1.79911	0.00381804	3.01249	0.0015746	10	2	66.2448	Chloride intracellular channel protein 4 OS=Mus musculus GN=Clic4
Q61112	Sdf4	1203.4	984.119	1140.96	1228.27	1044.81	953.686	1456.01	1559.71	1760.3	1516.7	1711.95	1701.52	1109.49	1075.59	1592	1643.39	0.96944	0.806274	1.03228	0.723439	1.5279	0.0147391	1.43489	0.0520263	8	2	58.9586	45 kDa calcium-binding protein OS=Mus musculus GN=Sdf4
Q61699	Hsph1	4247.26	4406.72	4788.62	4350.9	3858.63	3507.18	2782.11	3243.15	2357.64	4176.61	3989.87	3345.77	4480.87	3905.57	2794.3	3837.42	0.87161	0.179542	1.3733	0.0826434	0.982551	0.871834	0.623607	0.0568107	23	5	124.261	Heat shock protein 105 kDa OS=Mus musculus GN=Hsph1
Q99LP6	Grpel1	1850.01	1840.07	1249.6	1266.9	1021.31	761.533	1727.71	1385.54	1063.18	2272.9	2615.75	2251	1646.56	1016.58	1392.15	2379.88	0.617395	0.105837	1.70951	0.0459723	2.34107	0.0078691	0.845487	0.110945	7	1	35.3254	GrpE protein homolog 1, mitochondrial OS=Mus musculus GN=Grpel1
P63017	Hspa8	182738	178348	179879	175901	173569	174516	211624	216554	212156	187403	185519	186212	180322	174662	213445	186378	0.968613	0.055662	0.873191	0.0107426	1.06708	0.00213855	1.18369	0.00661678	77	29	469.045	Heat shock cognate 71 kDa protein OS=Mus musculus GN=Hspa8
Q91ZA3	Pcca	8575.98	9057.06	8718.59	8731.41	8254.4	8038.68	8482.83	7988.8	8699.06	8899.97	8674.92	8262.92	8783.88	8341.5	8390.23	8612.6	0.949637	0.209841	1.0265	0.547444	1.0325	0.425882	0.955185	0.364593	23	7	133.62	Propionyl-CoA carboxylase alpha chain, mitochondrial OS=Mus musculus GN=Pcca
P31938	Map2k1	268.221	286.087	378.429	510.844	638.872	590.448	264.151	357.578	349.23	208.919	238.577	267.977	310.912	580.055	323.653	238.491	1.86565	0.0193845	0.736872	0.136156	0.411152	0.0122069	1.04098	0.690211	3	1	15.6909	Dual specificity mitogen-activated protein kinase kinase 1 OS=Mus musculus GN=Map2k1
Q8BFZ9	Erlin2	11321.9	10323.4	10581.8	7932.33	8896.81	8932.96	10293.6	10503.8	10967.5	10834.5	11002.3	10671.1	10742.4	8587.36	10588.3	10836	0.799391	0.0231491	1.02339	0.424762	1.26185	0.0272258	0.985654	0.764446	9	5	53.5864	Erlin-2 OS=Mus musculus GN=Erlin2
Q8BYC6	Taok3	426.228	465.031	418.182	662.663	583.747	646.657	687.199	598.201	489.77	572.386	573.559	462.084	436.48	631.022	591.724	536.01	1.44571	0.0160352	0.905845	0.542287	0.849431	0.138972	1.35567	0.0892616	5	1	25.8041	Serine/threonine-protein kinase TAO3 OS=Mus musculus GN=Taok3
Q61316	Hspa4	31922.4	31722.4	32748.1	37840.4	38301.3	37922.7	37047.8	39228.7	38722	34103.4	33793.5	34519	32131	38021.5	38332.9	34138.6	1.18333	0.00532582	0.890584	0.0439632	0.897877	0.00221828	1.19302	0.0112276	30	14	182.268	Heat shock 70 kDa protein 4 OS=Mus musculus GN=Hspa4
P35276	Rab3d	4282.84	4417.06	4359.76	4393.67	4030.51	4106.27	4634.12	4823.29	4604.29	4417.14	4542.84	4727.94	4353.22	4176.81	4687.23	4562.64	0.959477	0.305917	0.973418	0.414768	1.09237	0.0792632	1.07673	0.0177617	6	2	38.3531	Ras-related protein Rab-3D OS=Mus musculus GN=Rab3d
Q6P4T2	Snrnp200	21189.6	22296	22449.8	24867.1	24975.4	25613.6	22233.5	23348.4	23329.6	22218.2	20937	21720.2	21978.5	25152	22970.5	21625.2	1.14439	0.0167901	0.941432	0.10777	0.859778	0.00867248	1.04514	0.00439973	22	3	115.424	U5 small nuclear ribonucleoprotein 200 kDa helicase OS=Mus musculus GN=Snrnp200
Q60864	Stip1	15630.1	16375	15606.1	16637.7	17648.2	16388.2	17831.6	17378.4	17213.7	15780.7	14941.1	15529.9	15870.4	16891.3	17474.6	15417.3	1.06433	0.145022	0.882266	0.0177198	0.912731	0.0604755	1.10108	0.043851	22	13	154.29	Stress-induced-phosphoprotein 1 OS=Mus musculus GN=Stip1
P62245	Rps15a	1780.12	1863.05	1948.17	2015.44	2158.28	2268.16	1766.73	1645.62	1794.09	1488.12	1702.97	1839.17	1863.78	2147.29	1735.48	1676.75	1.15212	0.0687154	0.966161	0.698753	0.780868	0.0395368	0.931161	0.171468	5	2	18.6372	40S ribosomal protein S15a OS=Mus musculus GN=Rps15a
P62702	Rps4x	5832.31	6335.6	5558.59	6072.3	6150.69	6352.52	3804.33	3878.92	4322.31	3837.29	4066.61	4584.65	5908.83	6191.84	4001.86	4162.85	1.0479	0.400183	1.04023	0.658691	0.672313	0.0144955	0.677267	0.0320437	12	5	70.2815	40S ribosomal protein S4, X isoform OS=Mus musculus GN=Rps4x
Q9EQU5	Set	17886.4	17629.7	17253.4	21743.7	20827.6	21786	17137	16336.6	17230.5	15270	15546.4	16571.6	17589.8	21452.4	16901.4	15796	1.21959	0.00712863	0.934598	0.145646	0.736326	0.00304542	0.96086	0.205157	8	5	63.778	Protein SET OS=Mus musculus GN=Set
Q61315	Apc	1215.65	1246.56	1451.05	2026.62	1801.63	1863.36	1711.76	1731.87	1815.19	1568.28	1476.92	1537.11	1304.42	1897.2	1752.94	1527.44	1.45445	0.0150116	0.871358	0.0241492	0.805099	0.0341585	1.34385	0.0153634	14	1	56.9305	Adenomatous polyposis coli protein OS=Mus musculus GN=Apc
A2AL36	Cntrl	4418.07	3865.38	4534.73	6723.67	6732.96	5760.03	5009.49	5225.99	4664.32	4440.3	4028.68	4509.39	4272.73	6405.55	4966.6	4326.13	1.49917	0.0228404	0.871043	0.0845787	0.675371	0.0232242	1.1624	0.198211	32	5	135.344	Centriolin OS=Mus musculus GN=Cntrl
Q9R100	Cdh17	99575.8	100726	97094.5	83115.6	83890.6	82515.7	88963.6	88422.7	85687	99331	102688	97654.8	99132.1	83174	87691.1	99891.1	0.839022	0.00919438	1.13913	0.0184125	1.20099	0.0128587	0.884588	0.00179817	27	16	218.825	Cadherin-17 OS=Mus musculus GN=Cdh17
Q64512	Ptpn13	4650.31	4331.07	4395	5173.4	5344.98	5093.47	5822.99	5697.17	6047.28	5621.75	5603.75	5756.54	4458.8	5203.95	5855.81	5660.68	1.16712	0.0160352	0.966677	0.257546	1.08777	0.0209209	1.31332	0.00981534	22	4	97.6801	Tyrosine-protein phosphatase non-receptor type 13 OS=Mus musculus GN=Ptpn13
P84104	Srsf3	12574.7	12591.7	12291.2	14717.8	14890.1	15291.2	13125.5	13834.1	13673.6	12376.5	12388.9	12128.8	12485.9	14966.4	13544.4	12298.1	1.19866	0.00587957	0.907985	0.0459311	0.821715	0.00443467	1.08478	0.0531191	6	2	62.8957	Serine/arginine-rich splicing factor 3 OS=Mus musculus GN=Srsf3
P70677	Casp3	3468.42	3551.73	3143.13	3770.05	3787.88	3761.69	3991.86	3895.3	3843.01	4260.86	4273.71	4234.65	3387.76	3773.2	3910.06	4256.41	1.11378	0.131475	1.08858	0.0348867	1.12806	0.000518623	1.15417	0.0441566	9	2	54.3635	Caspase-3 OS=Mus musculus GN=Casp3
Q9CPV4	Glod4	9386.89	9756.38	9494.43	8356.47	8595.98	7999.45	10249.5	9921.17	9674.99	9950.76	10436.9	9393.73	9545.9	8317.3	9948.54	9927.13	0.871296	0.0201541	0.997847	0.963667	1.19355	0.0297968	1.04218	0.220342	11	5	63.6255	Glyoxalase domain-containing protein 4 OS=Mus musculus GN=Glod4
O08832	Galnt4	2869.54	2760.58	2617.48	4260.98	3785.36	3529.89	2461.33	2762.04	2037.61	2875.1	2992.79	2780.06	2749.2	3858.74	2420.33	2882.65	1.40359	0.0493105	1.19102	0.215486	0.747043	0.0552258	0.880375	0.207111	7	3	34.3605	Polypeptide N-acetylgalactosaminyltransferase 4 OS=Mus musculus GN=Galnt4
P62281	Rps11	241.44	263.038	249.695	293.454	233.144	222.365	159.328	166.864	259.384	158.753	168.355	174.158	251.391	249.654	195.192	167.089	0.993092	0.960889	0.856021	0.548725	0.669279	0.0830691	0.776448	0.221485	5	1	24.0548	40S ribosomal protein S11 OS=Mus musculus GN=Rps11
Q9WUM3	Coro1b	7209.33	7473.21	7776.61	7572.76	8202.33	8393.79	8511.05	8288.7	8279.48	7588.01	7294.05	7287.41	7486.38	8056.29	8359.74	7389.82	1.07613	0.186586	0.883977	0.0127658	0.917273	0.129201	1.11666	0.0663596	15	6	87.8113	Coronin-1B OS=Mus musculus GN=Coro1b
P51658	Hsd17b2	5632.9	5283.48	5091.01	7154.61	7449.2	7565.84	8012.24	7893.16	7780.13	6995.79	7085.65	6804.36	5335.8	7389.88	7895.18	6961.93	1.38496	0.00548613	0.881796	0.00988111	0.94209	0.0742206	1.47966	0.00289597	7	3	44.5794	Estradiol 17-beta-dehydrogenase 2 OS=Mus musculus GN=Hsd17b2
O70400	Pdlim1	18902.6	18133.3	19053.9	15825.8	17124.4	16612.4	21986.6	21368.1	21982.6	19570.9	19207.1	19020.3	18696.6	16520.9	21779.1	19266.1	0.883629	0.0291192	0.884616	0.00862033	1.16617	0.0197726	1.16487	0.00162456	14	8	103.951	PDZ and LIM domain protein 1 OS=Mus musculus GN=Pdlim1
Q8K4L3	Svil	284.782	180.841	297.994	149.711	159.481	166.247	305.525	262.834	231.143	145.74	162.581	134.579	254.539	158.48	266.501	147.633	0.622614	0.166359	0.553969	0.0506185	0.93156	0.373109	1.04699	0.759993	5	1	21.9055	Supervillin OS=Mus musculus GN=Svil
Q9JHJ0	Tmod3	2644.38	2638.55	2154.78	1195.24	1027.85	1040.03	1457.93	1339.76	1419.64	1673.65	2432.41	1429.87	2479.24	1087.71	1405.77	1845.31	0.438727	0.0227878	1.31267	0.357414	1.69652	0.157721	0.567019	0.0181033	5	3	22.0255	Tropomodulin-3 OS=Mus musculus GN=Tmod3
Q8JZR0	Acsl5	918.326	877.81	739.51	1147.55	1298.74	1415.21	1071.51	1067.87	1189.76	1059.36	1111.6	1135.51	845.215	1287.17	1109.71	1102.16	1.52289	0.0298008	0.99319	0.907108	0.856265	0.163864	1.31294	0.11211	3	1	23.2941	Long-chain-fatty-acid--CoA ligase 5 OS=Mus musculus GN=Acsl5
Q9QXL1	Kif21b	645.146	671.772	617.564	427.039	704.694	532.168	1538.17	1322.95	1387.33	1659.39	1600.57	1761.8	644.827	554.634	1416.15	1673.92	0.860127	0.439543	1.18202	0.0716571	3.01806	0.00451957	2.19617	0.00513272	12	2	41.4577	Kinesin-like protein KIF21B OS=Mus musculus GN=Kif21b
Q9CWS0	Ddah1	7644.68	7353.13	6945.24	6983.69	7208.49	6734.34	7814.53	8014.55	7520.75	8932.3	8769.09	8615.31	7314.35	6975.51	7783.28	8772.23	0.953674	0.305917	1.12706	0.0263468	1.25758	0.00428567	1.06411	0.0917693	6	5	42.0111	N(G),N(G)-dimethylarginine dimethylaminohydrolase 1 OS=Mus musculus GN=Ddah1
Q8C0Z1	Itfg3	2435.58	2431.02	2176.88	2374.33	2279.96	1942.1	1939.26	1898.59	1703.91	2153.58	2100.87	2142.18	2347.83	2198.8	1847.25	2132.21	0.936525	0.464063	1.15426	0.0958071	0.969717	0.700279	0.786794	0.000645876	3	2	14.5111	Protein ITFG3 OS=Mus musculus GN=Itfg3
P50171	Hsd17b8	1105.45	999.701	1035.04	1218.18	1078.16	1164.16	1028.96	961.569	908.002	950.259	878.28	1078.8	1046.73	1153.5	966.176	969.114	1.102	0.155285	1.00304	0.973499	0.84015	0.0935493	0.923041	0.0960715	5	1	38.6691	Estradiol 17-beta-dehydrogenase 8 OS=Mus musculus GN=Hsd17b8
P30416	Fkbp4	25034.9	25761.8	25710.2	27793.1	27601.1	27650.5	29237.6	29536	29729.9	25986	25705.8	26312.8	25502.3	27681.6	29501.2	26001.5	1.08545	0.0229488	0.881372	0.00414629	0.939308	0.0149043	1.1568	0.00133823	23	10	135.599	Peptidyl-prolyl cis-trans isomerase FKBP4 OS=Mus musculus GN=Fkbp4
Q9D8B3	Chmp4b	3914.44	3986.81	4258.61	4838.1	5101.16	5199.11	4425.56	4687.35	4777.49	3910.49	3767.33	3862.9	4053.28	5046.13	4630.14	3846.91	1.24495	0.0113724	0.830841	0.0316946	0.762348	0.0101216	1.14232	0.0116708	3	2	17.8558	Charged multivesicular body protein 4b OS=Mus musculus GN=Chmp4b
Q9DCJ5	Ndufa8	4129.17	4494.16	3173.67	1178.99	1268.66	926.613	940.303	848.796	541.079	3119.19	4262.61	3144.36	3932.34	1124.76	776.726	3508.72	0.286028	0.0328977	4.51732	0.036551	3.11954	0.032325	0.197523	0.00266421	3	1	27.6532	NADH dehydrogenase [ubiquinone] 1 alpha subcomplex subunit 8 OS=Mus musculus GN=Ndufa8
P80316	Cct5	20585.9	20701.4	20177.4	22611.2	22172.3	22822	21006.2	21847.7	20679.5	22690.4	22232.3	21084.4	20488.3	22535.2	21177.8	22002.4	1.09991	0.00760245	1.03894	0.31543	0.976358	0.428333	1.03365	0.089684	24	12	127.661	T-complex protein 1 subunit epsilon OS=Mus musculus GN=Cct5
Q9DCD0	Pgd	53455.3	54470.3	55473.8	68452.7	65162.7	67836	64729.8	66239.7	67955.8	60678.8	61989.5	61509.2	54466.5	67150.5	66308.4	61392.5	1.23288	0.00711648	0.925862	0.0522676	0.914253	0.0330605	1.21742	0.000295144	22	16	131.767	6-phosphogluconate dehydrogenase, decarboxylating OS=Mus musculus GN=Pgd
Q60847	Col12a1	22393.3	22424.8	22202.9	23382.4	23136.5	22436.5	19394.6	19772.8	19312.1	19642.1	19345.2	18616.1	22340.3	22985.1	19493.2	19201.2	1.02886	0.192881	0.98502	0.529739	0.835374	0.00431989	0.872556	0.00156394	52	14	255.01	Collagen alpha-1(XII) chain OS=Mus musculus GN=Col12a1
G3X912	Sprtn	409.352	473.608	485.118	843.255	629.082	569.153	312.363	339.574	284.864	409.454	367.535	471.151	456.026	680.497	312.267	416.047	1.49223	0.148622	1.33234	0.0975991	0.611386	0.0979485	0.684758	0.040926	3	1	14.8922	SprT-like domain-containing protein Spartan OS=Mus musculus GN=Sprtn
Q8BTI8	Srrm2	112905	109391	110754	140348	149521	155542	115789	114496	117061	98778.6	105839	108677	111017	148470	115782	104432	1.33737	0.0268121	0.901968	0.0962323	0.703384	0.00746977	1.04292	0.041805	10	6	33.0478	Serine/arginine repetitive matrix protein 2 OS=Mus musculus GN=Srrm2
Q05860	Fmn1	214.782	133.019	208.103	37.1899	77.5952	37.0688	700.061	641.31	616.421	832.175	883.626	850.296	185.301	50.618	652.597	855.366	0.273166	0.0409747	1.31071	0.0200348	16.8985	0.00028337	3.52182	0.0132801	6	1	31.7604	Formin-1 OS=Mus musculus GN=Fmn1
Q99KP6	Prpf19	5538.06	5741.4	6128.28	5784.59	5544.66	6087.33	6401.72	6461.1	6149.23	5456.04	5363.99	5770.77	5802.58	5805.53	6337.35	5530.27	1.00051	0.992086	0.872647	0.0274473	0.952586	0.285721	1.09216	0.177316	9	4	42.7805	Pre-mRNA-processing factor 19 OS=Mus musculus GN=Prpf19
Q8BMP6	Acbd3	2258.22	2439.93	2704.2	2300.56	2145.26	2078.12	2244.66	2787.23	2587.01	2168.57	2077.22	2303.27	2467.45	2174.65	2539.64	2183.02	0.881333	0.186241	0.85958	0.204308	1.00385	0.939922	1.02925	0.659676	9	3	49.9342	Golgi resident protein GCP60 OS=Mus musculus GN=Acbd3
Q8VE47	Uba5	913.938	818.904	918.839	858.861	600.588	706.309	877.968	797.467	665.482	688.598	713.258	686.035	883.893	721.919	780.305	695.964	0.816749	0.200424	0.891912	0.383283	0.964046	0.789381	0.882805	0.31094	3	1	14.8047	Ubiquitin-like modifier-activating enzyme 5 OS=Mus musculus GN=Uba5
Q9DBC7	Prkar1a	661.656	854.607	618.144	364.192	197.447	177.341	109.849	174.127	83.839	469.231	602.065	438.274	711.469	246.327	122.605	503.19	0.346223	0.023163	4.10415	0.0251639	2.04277	0.0483757	0.172327	0.004257	3	1	15.7429	cAMP-dependent protein kinase type I-alpha regulatory subunit OS=Mus musculus GN=Prkar1a
Q6ZQM8	Ugt1a7c	38205	40916.5	40693.8	53866.4	51329.1	52144	52992.9	52643.4	50711.8	54707.3	54897	54188.4	39938.5	52446.5	52116	54597.6	1.31318	0.0043962	1.04762	0.108279	1.04101	0.121603	1.30491	0.0139047	28	12	169.477	UDP-glucuronosyltransferase 1-7C OS=Mus musculus GN=Ugt1a7c
P09405	Ncl	77167.2	76835.7	75679.1	94554.3	92750.7	92031.5	107410	107168	102346	99834.2	99625.4	99471.2	76560.7	93112.2	105641	99643.6	1.21619	0.00285216	0.943226	0.113627	1.07015	0.0232242	1.37984	0.000957725	28	22	191.511	Nucleolin OS=Mus musculus GN=Ncl
Q62469	Itga2	2599.71	2580.32	2651.95	2120.46	2248.39	2296.84	1754.01	1899.91	1699.56	1906.28	2045.55	2199.59	2610.66	2221.9	1784.49	2050.47	0.851087	0.024525	1.14905	0.115665	0.922847	0.210736	0.683541	0.0110924	3	3	14.392	Integrin alpha-2 OS=Mus musculus GN=Itga2
Q9CQC9	Sar1b	2429.89	2244.41	2329.88	2544	2478.96	2719.02	1575.06	1423.18	1123.83	1911.88	1770.07	1721.11	2334.73	2580.66	1374.03	1801.02	1.10534	0.0910916	1.31076	0.113627	0.697892	0.00557864	0.588516	0.0296781	1	1	7.1855	GTP-binding protein SAR1b OS=Mus musculus GN=Sar1b
Q922R8	Pdia6	37995.9	37663.9	37623	46876	47727.6	45848.5	43087.4	42733.8	42550.7	47174.7	47179.4	49192.3	37760.9	46817.4	42790.6	47848.8	1.23984	0.0108936	1.11821	0.0386757	1.02203	0.346989	1.1332	6.29153e-05	18	14	125.216	Protein disulfide-isomerase A6 OS=Mus musculus GN=Pdia6
Q9Z1W8	Atp12a	51968.4	52983.4	55693	64280.6	63381.9	62345.2	78485.1	79791.4	81583.9	71067.3	69533.7	70945.2	53548.3	63335.9	79953.4	70515.4	1.18278	0.0159009	0.881956	0.0144953	1.11336	0.00384084	1.49311	0.000587432	38	4	220.58	Potassium-transporting ATPase alpha chain 2 OS=Mus musculus GN=Atp12a
Q3V0K9	Pls1	23987.4	23868.5	23657	23625.7	22724.3	22931.1	24897.5	24332.6	23953	23074.7	23254.7	24045	23837.7	23093.7	24394.4	23458.1	0.968791	0.142514	0.961621	0.133108	1.01578	0.460651	1.02336	0.0899187	31	14	176.157	Plastin-1 OS=Mus musculus GN=Pls1
P30681	Hmgb2	17216	16489.8	17016.4	17776.6	19995.5	19559.6	17202.6	17860.6	17705.9	14854.8	14566.3	15289.7	16907.4	19110.5	17589.7	14903.6	1.13031	0.110518	0.847291	0.00844209	0.779862	0.0316232	1.04036	0.231036	8	4	62.4406	High mobility group protein B2 OS=Mus musculus GN=Hmgb2
Q9WUM4	Coro1c	6703.94	6728.29	6959.56	6317.96	6971.66	6679.39	7829.34	7926.56	7740.36	6489.6	6629.24	6574.35	6797.26	6656.34	7832.09	6564.4	0.979268	0.606026	0.838141	0.00339339	0.986187	0.712215	1.15224	0.0155862	7	2	49.2126	Coronin-1C OS=Mus musculus GN=Coro1c
Q3UV17	Krt76	9619.06	10386.4	10138.4	14075.1	13418.3	13558.9	14839.1	14384.3	15724.1	14846.8	15021.5	15610.4	10048	13684.1	14982.5	15159.6	1.36188	0.0038334	1.01182	0.772674	1.10782	0.0191233	1.4911	0.00842313	46	5	236.506	Keratin, type II cytoskeletal 2 oral OS=Mus musculus GN=Krt76
Q00897	Serpina1d	429.586	351.154	308.624	28.3345	25.6818	0	67.1464	70.7171	44.474	357.388	534.572	179.024	363.121	18.0054	60.7792	356.995	0.0495852	0.0217541	5.87364	0.156826	19.827	0.105957	0.16738	0.00312446	9	1	70.2943	Alpha-1-antitrypsin 1-4 OS=Mus musculus GN=Serpina1d
Q8K1Z0	Coq9	1863	1721.38	1653.41	2739.87	2376.18	2748.73	2245.71	2092.64	2312	2049.81	2080.85	1854.15	1745.93	2621.59	2216.78	1994.94	1.50155	0.0229456	0.899924	0.133788	0.760964	0.0327792	1.26969	0.038203	3	1	27.2834	Ubiquinone biosynthesis protein COQ9, mitochondrial OS=Mus musculus GN=Coq9
P26369	U2af2	2672.74	2387.63	2634.24	2273.79	2341.44	2144.73	2284.82	2584.01	2373.62	2093.64	2128.16	2227.01	2564.87	2253.32	2414.15	2149.6	0.878532	0.0852815	0.890418	0.129367	0.953971	0.262783	0.941236	0.485509	1	1	6.8186	Splicing factor U2AF 65 kDa subunit OS=Mus musculus GN=U2af2
P26638	Sars	8960.12	8314.93	8327.79	3242.18	3077.59	3290.24	4929.03	4467.61	4540.49	7277.78	7224.99	6953.24	8534.28	3203.34	4645.71	7152.01	0.37535	0.00554197	1.53949	0.00559771	2.23267	0.000677652	0.544358	0.000127329	10	4	59.3208	Serine--tRNA ligase, cytoplasmic OS=Mus musculus GN=Sars
P53026	Rpl10a	228.089	263.584	220.702	301.835	212.653	316.178	861.178	696.532	660.762	564.303	612.44	583.002	237.458	276.889	739.491	586.582	1.16605	0.409466	0.793224	0.186023	2.11847	0.0118352	3.11419	0.00841704	2	1	9.9018	60S ribosomal protein L10a OS=Mus musculus GN=Rpl10a
O35621	Pmm1	562.723	517.602	528.403	339.414	262.385	464.28	400.506	299.17	324.668	340.117	307.741	507.139	536.243	355.36	341.448	384.999	0.662684	0.126056	1.12755	0.64232	1.08341	0.773543	0.636741	0.0176718	4	1	21.8169	Phosphomannomutase 1 OS=Mus musculus GN=Pmm1
O08663	Metap2	1487.77	1508.48	1468.49	1419.3	1462.92	1370.5	1281.67	1311.79	1291.39	1217.56	1187.06	1300.15	1488.25	1417.57	1294.95	1234.92	0.952512	0.145354	0.953643	0.283362	0.871151	0.0272537	0.870118	0.00182828	8	1	53.1907	Methionine aminopeptidase 2 OS=Mus musculus GN=Metap2
P17717	Ugt2b17	725.976	923.408	927.36	820.479	793.477	573.877	927.156	1005.34	1152.46	932.773	926.112	799.546	858.915	729.278	1028.32	886.144	0.849069	0.334683	0.861742	0.22334	1.2151	0.209711	1.19723	0.0659361	4	1	25.8799	UDP-glucuronosyltransferase 2B17 OS=Mus musculus GN=Ugt2b17
Q9JHR7	Ide	20545.1	20933.5	21351.1	23098.7	22780.8	22476.6	17769.1	17658.6	18054.7	15955.3	15120.7	16877.2	20943.2	22785.4	17827.5	15984.4	1.08796	0.0148061	0.896615	0.10656	0.701519	0.00845444	0.851229	0.00242881	22	9	107.943	Insulin-degrading enzyme OS=Mus musculus GN=Ide
P46660	Ina	2423.9	2101.12	1776.52	2113.24	2129.69	1783.49	2600.98	3052.87	2860.68	2841.21	3116.6	2858.83	2100.51	2008.81	2838.18	2938.88	0.956342	0.751342	1.03548	0.633838	1.463	0.0101216	1.35118	0.128062	15	2	113.325	Alpha-internexin OS=Mus musculus GN=Ina
Q9DBJ3	Baiap2l1	1746.34	2090.21	1970.23	1840.27	1902.34	1813.66	1566.37	1525.94	1480.13	1876.84	1683.52	1902.77	1935.59	1852.09	1524.15	1821.05	0.956861	0.555797	1.1948	0.0751447	0.983238	0.737878	0.787432	0.0668021	5	2	18.2468	Brain-specific angiogenesis inhibitor 1-associated protein 2-like protein 1 OS=Mus musculus GN=Baiap2l1
P52503	Ndufs6	7914.2	8691.23	8744.8	9636.74	9065.4	9630.27	10423.9	9885.86	10677.3	8049.8	8389.08	8661.94	8450.08	9444.14	10329	8366.94	1.11764	0.0754693	0.810042	0.0171714	0.88594	0.0266172	1.22236	0.0415123	11	5	60.9524	NADH dehydrogenase [ubiquinone] iron-sulfur protein 6, mitochondrial OS=Mus musculus GN=Ndufs6
P14152	Mdh1	96701.9	95946.3	98719.3	87368.6	89112	86058.2	114663	108095	109443	107448	109306	108444	97122.5	87512.9	110734	108400	0.901057	0.00765674	0.978923	0.440843	1.23867	0.00178451	1.14014	0.0231509	36	28	194.958	Malate dehydrogenase, cytoplasmic OS=Mus musculus GN=Mdh1
P25444	Rps2	8464.72	8778.88	8720.36	7730.13	7244.7	7394.44	6106.84	6317.42	5900.52	6724.06	6066.97	6472.03	8654.65	7456.42	6108.26	6421.02	0.861551	0.0140082	1.0512	0.324494	0.86114	0.0269403	0.705777	0.00359447	8	4	39.328	40S ribosomal protein S2 OS=Mus musculus GN=Rps2
Q99P72	Rtn4	457.242	524.777	425.107	503.531	462.327	420.099	540.719	468.025	437.43	395.858	394.601	400.572	469.042	461.986	482.058	397.01	0.984956	0.892627	0.823574	0.165399	0.859356	0.144897	1.02775	0.76962	9	1	34.4564	Reticulon-4 OS=Mus musculus GN=Rtn4
O88492	Plin4	1731.23	1642.93	1807.1	1932.1	2164.82	2078.06	1902.07	1869.61	2079.35	1377.33	1498.2	1790.05	1727.09	2058.33	1950.34	1555.19	1.19179	0.0414484	0.797396	0.109661	0.755562	0.0526185	1.12927	0.012951	8	1	33.7915	Perilipin-4 OS=Mus musculus GN=Plin4
Q91V41	Rab14	7657.49	7839.45	7156.89	8177.27	8008.55	7755.88	9099.95	9262.68	9240.92	9033.7	9272.64	8898.09	7551.28	7980.57	9201.19	9068.14	1.05685	0.211821	0.985541	0.432314	1.13628	0.00895044	1.21849	0.0202628	10	5	73.8976	Ras-related protein Rab-14 OS=Mus musculus GN=Rab14
P52840	Sult1a1	17310.6	17454.5	17701.1	13727.8	12687.8	12531.9	15556.7	16111.4	16706.5	12566.4	12140.4	12682.4	17488.7	12982.5	16124.9	12463.1	0.742335	0.0146148	0.772909	0.014787	0.95999	0.347187	0.922015	0.0288621	14	12	55.085	Sulfotransferase 1A1 OS=Mus musculus GN=Sult1a1
Q03958	Pfdn6	1234.08	987.567	725.951	1047.27	1081.59	788.364	982.872	806.751	797.799	1045.59	989.786	858.026	982.532	972.409	862.474	964.466	0.989697	0.96884	1.11825	0.357414	0.991832	0.950807	0.877807	0.392402	3	2	17.6567	Prefoldin subunit 6 OS=Mus musculus GN=Pfdn6
P15626	Gstm2	10130.5	8741.62	8093.81	6971.91	6543.43	7054.46	6842.07	6812.19	7204.01	7956.05	6965.57	5438.21	8988.63	6856.6	6952.76	6786.61	0.762808	0.0988252	0.976104	0.877694	0.989793	0.940038	0.773506	0.0866709	17	5	116.723	Glutathione S-transferase Mu 2 OS=Mus musculus GN=Gstm2
P97429	Anxa4	61224.6	60569.4	56745.4	57201.5	58329.2	58119.3	67752.1	66922.6	66632.2	67985.8	67186.2	67685.2	59513.1	57883.3	67102.3	67619.1	0.972614	0.421302	1.0077	0.357514	1.1682	0.00106011	1.12752	0.0265209	30	14	204.516	Annexin A4 OS=Mus musculus GN=Anxa4
Q9ERF3	Wdr61	3052.07	3261.25	2539.09	3657.8	3604.57	3244.31	4356.07	4114.29	3301.59	2294.49	2316.38	2656.21	2950.8	3502.23	3923.98	2422.36	1.18687	0.151698	0.617322	0.0648511	0.691663	0.0102871	1.3298	0.016718	3	1	16.4132	WD repeat-containing protein 61 OS=Mus musculus GN=Wdr61
P99028	Uqcrh	11666.3	11452.3	11554.5	13455.6	12893.9	13019.9	10801	11533.9	10296.6	12496.2	11336.9	11269.4	11557.7	13123.1	10877.2	11700.8	1.13545	0.0194125	1.07573	0.271342	0.891619	0.0761658	0.941121	0.22971	3	2	43.7078	Cytochrome b-c1 complex subunit 6, mitochondrial OS=Mus musculus GN=Uqcrh
Q3US41	Esrp1	733.655	922.436	859.897	610.255	562.271	586.091	603.478	567.042	464.902	774.263	791.156	669.343	838.662	586.206	545.141	744.921	0.698977	0.0678239	1.36647	0.0558494	1.27075	0.0603131	0.650012	0.0734963	3	1	12.5802	Epithelial splicing regulatory protein 1 OS=Mus musculus GN=Esrp1
Q91VD9	Ndufs1	70376.6	72685.4	71623	70538.2	71233.8	71231.2	86956	87526.4	87205.1	83719.5	83829.4	86978.7	71561.7	71001.1	87229.2	84842.5	0.992166	0.554711	0.97264	0.217434	1.19495	0.0116024	1.21894	0.00141396	33	23	254.121	NADH-ubiquinone oxidoreductase 75 kDa subunit, mitochondrial OS=Mus musculus GN=Ndufs1
Q9CXR1	Dhrs7	364.051	298.245	218.28	41.064	0	0	0	0	0	545.305	639.054	147.807	293.525	13.688	0	444.056	0.0466331	0.0333915	Inf	0.153086	32.4412	0.131936	0	0.000548436	2	1	16.105	Dehydrogenase/reductase SDR family member 7 OS=Mus musculus GN=Dhrs7
Q62261	Sptbn1	110108	108327	108184	98464.1	97858.7	96932.3	113544	113866	111922	108865	107344	105981	108873	97751.7	113110	107397	0.89785	0.00329952	0.949487	0.0257142	1.09867	0.00702078	1.03892	0.0231401	121	65	832.768	Spectrin beta chain, non-erythrocytic 1 OS=Mus musculus GN=Sptbn1
Q9CWK8	Snx2	5858.58	5911.06	6003.34	6910.45	7189.9	7117.77	6899.74	7112.64	6967.33	6338.06	6222.85	5994.51	5924.33	7072.7	6993.24	6185.14	1.19384	0.00712863	0.884446	0.0203719	0.874508	0.00893354	1.18043	0.00397845	17	4	116.434	Sorting nexin-2 OS=Mus musculus GN=Snx2
Q91WD5	Ndufs2	2773.73	2532.05	2303.32	1868.85	1465.8	1587.99	1781.15	1668.04	2090.52	2734.48	2858.15	2376.15	2536.37	1640.88	1846.57	2656.26	0.646943	0.0228114	1.43848	0.0394562	1.6188	0.0149043	0.728038	0.103206	7	3	36.0188	NADH dehydrogenase [ubiquinone] iron-sulfur protein 2, mitochondrial OS=Mus musculus GN=Ndufs2
Q6PDL0	Dync1li2	5101.25	4912.15	4528.01	5085.67	5423.02	4683.86	6175.49	5419.16	5320.85	5110.29	5197.56	5188.06	4847.13	5064.18	5638.5	5165.3	1.04478	0.531113	0.916077	0.292631	1.01997	0.716628	1.16326	0.0316507	18	5	98.0128	Cytoplasmic dynein 1 light intermediate chain 2 OS=Mus musculus GN=Dync1li2
Q99JW5	Epcam	46779.7	47758.7	43532.6	27699.5	29527.8	26958.1	37191.3	37153.2	34696.6	57181.7	60309.2	57028.5	46023.6	28061.8	36347	58173.1	0.609726	0.00587957	1.60049	0.00414629	2.07304	0.000951264	0.789747	0.00106403	15	11	86.2132	Epithelial cell adhesion molecule OS=Mus musculus GN=Epcam
Q93092	Taldo1	78578.1	77428.7	78186.1	82982.9	86013	87535.6	94108.6	96255.3	95778	84822	84544.4	88479.6	78064.3	85510.5	95380.6	85948.6	1.09539	0.048712	0.901112	0.0263468	1.00512	0.841758	1.22182	0.0029181	28	19	210.011	Transaldolase OS=Mus musculus GN=Taldo1
Q9QZQ1	Mllt4	279.553	246.602	268.308	298.582	285.684	235.649	265.528	249.223	253.42	319.02	279.931	373.751	264.821	273.305	256.057	324.234	1.03204	0.768329	1.26626	0.186023	1.18634	0.248354	0.966906	0.270878	9	1	32.0036	Afadin OS=Mus musculus GN=Mllt4
P62774	Mtpn	15981.3	15610.4	15345.3	12572.5	12223.7	11803.8	14514.8	14086.2	13566.9	13662.2	13507.2	14047.1	15645.7	12200	14055.9	13738.8	0.779768	0.00406968	0.977441	0.462662	1.12614	0.0154747	0.898391	0.00565788	5	3	48.9732	Myotrophin OS=Mus musculus GN=Mtpn
Q99PT1	Arhgdia	55150.6	53789.4	55953.2	55704.5	59351.7	61040.2	69416.9	70067.8	70348.7	60834.5	59490.4	62317.3	54964.4	58698.8	69944.5	60880.8	1.06794	0.175247	0.870416	0.0199158	1.03717	0.350443	1.27254	0.00231862	20	14	160.135	Rho GDP-dissociation inhibitor 1 OS=Mus musculus GN=Arhgdia
P97449	Anpep	1735.77	1827.01	1781.57	2246.55	2051.88	2138.83	1748.22	1910.72	1854.38	1627.88	1881.6	1892.56	1781.45	2145.76	1837.78	1800.68	1.2045	0.0285891	0.979815	0.778213	0.839182	0.0547479	1.03162	0.122261	7	2	33.6823	Aminopeptidase N OS=Mus musculus GN=Anpep
Q3THE2	Myl12b	19617.8	18893.6	19557.6	22661.6	21942.6	21879.3	20414.4	21864.7	20587.3	21663	20483.8	19870	19356.3	22161.2	20955.5	20672.2	1.14491	0.00711648	0.986484	0.758883	0.932812	0.115068	1.08262	0.143324	28	2	190.527	Myosin regulatory light chain 12B OS=Mus musculus GN=Myl12b
P62192	Psmc1	2029.55	2055.99	2100.02	2614.13	2465.4	2476.36	2225.63	2221.7	2319.6	2143.22	2128.26	1995.51	2061.86	2518.63	2255.64	2089	1.22153	0.0159367	0.92612	0.0907803	0.829419	0.00941224	1.09399	0.00513207	7	1	35.4414	26S protease regulatory subunit 4 OS=Mus musculus GN=Psmc1
Q9D8V0	Hm13	0	0	0	0	0	0	0	0	0	2044.87	2011.26	1294.21	0	0	0	1783.45	NA	NA	Inf	0.0470254	Inf	0.0322534	#DIV/0!	1	8	1	50.8385	Minor histocompatibility antigen H13 OS=Mus musculus GN=Hm13
Q7TMY8	Huwe1	483.966	986.43	1063.13	0	0	0	0	0	0	5148.8	5963.79	5161.63	844.508	0	0	5424.74	0	0.0738702	Inf	0.014787	Inf	0.008327	0	0.00115425	8	1	30.4887	E3 ubiquitin-protein ligase HUWE1 OS=Mus musculus GN=Huwe1
Q91YP2	Nln	207.647	220.262	120.234	0	0	0	0	0	0	253.451	364.288	252.549	182.714	0	0	290.096	0	0.0538927	Inf	0.0431148	Inf	0.0290079	0	0.00107735	6	1	33.0922	Neurolysin, mitochondrial OS=Mus musculus GN=Nln

## Sheet: Column names legend
Accession	UniProt accession ID
Gene ID	NCBI gene ID
12m AIN_1	protein abundance measure 1 for group 12 months fed with control diet (AIN-93G)
12m AIN_2	protein abundance measure 2 for group 12 months fed with control diet (AIN-93G)
12m AIN_3	protein abundance measure 3 for group 12 months fed with control diet (AIN-93G)
12m WD_1	protein abundance measure 1 for group 12 months fed with Western diet
12m WD_2	protein abundance measure 2 for group 12 months fed with Western diet
12m WD_3	protein abundance measure 3 for group 12 months fed with Western diet
18m AIN_1	protein abundance measure 1 for group 18 months fed with control diet (AIN-93G)
18m AIN_2	protein abundance measure 2 for group 18 months fed with control diet (AIN-93G)
18m AIN_3	protein abundance measure 3 for group 18 months fed with control diet (AIN-93G)
18m WD_1	protein abundance measure 1 for group 18 months fed with Western diet
18m WD_2	protein abundance measure 2 for group 18 months fed with Western diet
18m WD_3	protein abundance measure 3 for group 18 months fed with Western diet
Average 12 AIN	Average protein abundance in group 12 months fed with control diet
Average 12 WD	Average protein abundance in group 12 months fed with Western diet
Average 18 AIN	Average protein abundance in group 18 months fed with control diet
Average 18 WD	Average protein abundance in group 18 months fed with Western diet
12 WD / 12 AIN	Ration between groups: 12 WD and 12 AIN
p value	p value for coresponding comaprison calculated in Waters software
18 WD / 18AIN	Ration between groups: 18 WD and 18 AIN
18 WD / 12 WD	Ration between groups: 18 WD and 12 WD
18AIN / 12 AIN	Ration between groups: 18 AIN and 12 AIN
Peptide count	Number of peptides detected in LS MS analysis for each protein
Peptides used for quantitation	Number of peptides detected in LS MS analysis for each protein and used for quantitation
Confidence score	Confidence score of detected proteins
Description	Name of the protein, taxon, gene name
